# Supplementary material for: Risk Factors and Predictive Nomograms for Early Death of Patients with Advanced Hepatocellular Carcinoma: A Large Retrospective Study Based on the SEER Database
Source: Research Square preprint supplement (doi:10.21203/rs.3.rs-1415995/v1), 2022-03-22
Supplement: Supplementary file 3 [file 2506f9bc506fb1ece47aa355.xlsx]

## Sheet: Sheet1
Survival_months_1	Age	Gender	Race	Marital_status	Tumor_size_1	Histological_grade	AFP	Fibrosis_score	T_stage_2	N_stage	Bone_metastasis	Brain_metastasis	Lung_metastasis	Surgery_1	Radiotherapy	Chemotherapy
＞3	≥40	Male	White	Married	51~100	Unknown	Positive	Unknown	T3	N0	No	No	Yes	No	No/Unknown	Yes
≤3	≥40	Female	Black	Divorced	＞100	Unknown	Positive	Ishak 5-6	T3	N1	No	No	No	No	No/Unknown	No/Unknown
≤3	≥40	Male	Black	Unmarried	＞100	Unknown	Positive	Unknown	T3	N0	No	No	Yes	No	No/Unknown	No/Unknown
≤3	≥40	Male	Others	Widowed	＞100	Grade III	Negative	Unknown	T4	N0	No	No	No	No	No/Unknown	No/Unknown
＞3	≥40	Male	White	Married	Unknown	Grade I	Positive	Ishak 5-6	T1	N1	No	No	No	No	No/Unknown	Yes
≤3	≥40	Male	Others	Unmarried	＞100	Unknown	Unknown	Unknown	T3	N0	No	No	No	No	No/Unknown	No/Unknown
≤3	≥40	Male	Black	Unmarried	Unknown	Unknown	Negative	Unknown	TX	NX	Yes	No	No	No	Yes	Yes
≤3	≥40	Male	Others	Unmarried	Unknown	Unknown	Negative	Unknown	TX	N0	Yes	No	No	No	No/Unknown	No/Unknown
≤3	≥40	Female	Black	Widowed	＞100	Unknown	Unknown	Unknown	T4	N0	Unknown	Unknown	Unknown	No	No/Unknown	No/Unknown
≤3	≥40	Male	White	Divorced	Unknown	Unknown	Positive	Unknown	T3	N0	Yes	No	No	No	No/Unknown	No/Unknown
＞3	≥40	Male	White	Married	Unknown	Unknown	Positive	Ishak 5-6	T1	N0	No	No	Yes	No	No/Unknown	Yes
≤3	≥40	Female	White	Widowed	Unknown	Grade III	Unknown	Unknown	T1	N0	Yes	No	Yes	No	Yes	No/Unknown
≤3	≥40	Female	White	Widowed	Unknown	Grade II	Unknown	Unknown	T1	N0	Yes	No	Yes	No	No/Unknown	No/Unknown
≤3	≥40	Male	White	Married	Unknown	Grade II	Positive	Unknown	T1	N0	No	No	No	No	No/Unknown	No/Unknown
≤3	≥40	Female	Others	Widowed	＞100	Unknown	Positive	Unknown	T1	N0	No	No	Yes	No	No/Unknown	No/Unknown
＞3	≥40	Male	White	Unmarried	Unknown	Unknown	Positive	Ishak 0-4	TX	N0	No	No	No	No	No/Unknown	No/Unknown
＞3	≥40	Male	Others	Married	51~100	Unknown	Positive	Unknown	T4	N1	Unknown	No	Yes	No	No/Unknown	No/Unknown
＞3	≥40	Male	Others	Widowed	21~50	Unknown	Negative	Unknown	T2	N0	Yes	No	No	No	No/Unknown	No/Unknown
≤3	≥40	Male	White	Married	Unknown	Unknown	Positive	Ishak 5-6	T3	NX	No	No	No	No	No/Unknown	No/Unknown
≤3	≥40	Male	Black	Unmarried	＞100	Unknown	Positive	Ishak 0-4	T3	N0	Yes	No	Yes	No	No/Unknown	No/Unknown
＞3	≥40	Male	White	Married	Unknown	Unknown	Unknown	Unknown	TX	N0	Yes	No	No	No	Yes	No/Unknown
＞3	≥40	Male	Black	Unmarried	＞100	Grade III	Positive	Unknown	T3	N0	No	No	No	No	No/Unknown	No/Unknown
＞3	≥40	Male	White	Unmarried	＞100	Unknown	Positive	Unknown	T3	N0	No	No	No	No	Yes	Yes
＞3	≥40	Male	White	Unmarried	Unknown	Unknown	Unknown	Unknown	TX	N1	No	No	Yes	No	No/Unknown	No/Unknown
＞3	＜40	Male	White	Separated	＞100	Unknown	Positive	Unknown	T3	N0	No	No	No	No	No/Unknown	No/Unknown
≤3	≥40	Male	Others	Married	Unknown	Unknown	Positive	Ishak 5-6	TX	N1	Yes	No	Unknown	No	No/Unknown	No/Unknown
＞3	≥40	Male	Black	Married	＞100	Unknown	Positive	Unknown	T3	N0	No	No	Yes	No	No/Unknown	Yes
＞3	≥40	Male	Others	Married	＞100	Unknown	Positive	Unknown	T4	N1	No	No	No	No	No/Unknown	Yes
≤3	≥40	Male	Black	Married	Unknown	Unknown	Unknown	Unknown	T1	N0	No	No	Yes	No	No/Unknown	No/Unknown
≤3	≥40	Male	White	Unmarried	51~100	Unknown	Unknown	Unknown	T3	N1	No	No	No	No	No/Unknown	No/Unknown
≤3	≥40	Male	Others	Married	＞100	Grade III	Positive	Unknown	T3	N0	No	No	No	No	No/Unknown	Yes
＞3	≥40	Male	White	Divorced	51~100	Unknown	Unknown	Unknown	T1	N0	No	No	No	No	No/Unknown	Yes
＞3	≥40	Female	Black	Unmarried	＞100	Grade I	Negative	Ishak 0-4	T3	N0	No	No	No	No	No/Unknown	Yes
≤3	≥40	Female	White	Married	21~50	Unknown	Negative	Unknown	T2	N1	No	No	No	No	No/Unknown	No/Unknown
＞3	≥40	Male	Black	Unmarried	≤20	Unknown	Negative	Unknown	T2	N1	No	No	No	Local tumor destruction	No/Unknown	No/Unknown
≤3	＜40	Male	Others	Married	＞100	Unknown	Positive	Ishak 0-4	T3	N0	No	No	Yes	No	No/Unknown	No/Unknown
≤3	≥40	Female	Others	Married	Unknown	Unknown	Unknown	Unknown	T4	NX	Yes	No	No	No	No/Unknown	No/Unknown
≤3	≥40	Female	Others	Married	Unknown	Unknown	Positive	Unknown	T4	NX	No	No	No	No	No/Unknown	No/Unknown
≤3	≥40	Female	Others	Married	51~100	Unknown	Unknown	Unknown	T2	N0	No	No	Yes	No	No/Unknown	No/Unknown
≤3	≥40	Female	Others	Widowed	51~100	Unknown	Unknown	Unknown	T1	N0	No	No	Yes	No	No/Unknown	No/Unknown
＞3	≥40	Female	White	Unmarried	51~100	Unknown	Positive	Ishak 5-6	T4	N1	No	No	Yes	No	Yes	Yes
≤3	≥40	Male	Black	Divorced	21~50	Unknown	Negative	Unknown	T3	N1	No	No	No	No	No/Unknown	No/Unknown
≤3	≥40	Male	White	Divorced	≤20	Unknown	Positive	Unknown	T4	N1	No	No	Yes	No	No/Unknown	No/Unknown
＞3	≥40	Female	Others	Married	＞100	Unknown	Positive	Unknown	T4	N0	No	No	Yes	No	No/Unknown	Yes
＞3	≥40	Female	Others	Widowed	＞100	Unknown	Positive	Unknown	T4	N0	No	No	No	No	No/Unknown	Yes
≤3	≥40	Male	Others	Married	＞100	Unknown	Positive	Unknown	TX	NX	Yes	No	Yes	No	No/Unknown	No/Unknown
＞3	≥40	Male	White	Married	Unknown	Unknown	Negative	Unknown	TX	N1	Yes	No	Unknown	No	No/Unknown	Yes
＞3	≥40	Male	White	Married	Unknown	Grade I	Positive	Unknown	T3	NX	No	No	No	No	No/Unknown	Yes
≤3	≥40	Male	White	Married	Unknown	Unknown	Unknown	Unknown	T3	N1	No	No	Yes	No	No/Unknown	No/Unknown
＞3	≥40	Male	White	Married	＞100	Unknown	Negative	Unknown	T2	N0	No	No	No	Wedge resection	No/Unknown	Yes
≤3	≥40	Female	White	Unmarried	Unknown	Unknown	Positive	Unknown	TX	NX	Yes	No	Yes	No	No/Unknown	Yes
＞3	≥40	Male	White	Married	＞100	Grade II	Unknown	Unknown	T1	N0	No	No	Yes	No	No/Unknown	No/Unknown
＞3	≥40	Male	White	Unmarried	Unknown	Unknown	Unknown	Unknown	TX	NX	Unknown	Unknown	Unknown	No	No/Unknown	Yes
≤3	≥40	Male	Black	Divorced	Unknown	Unknown	Positive	Unknown	T1	N0	No	No	Yes	No	No/Unknown	No/Unknown
＞3	≥40	Male	White	Married	Unknown	Unknown	Unknown	Unknown	TX	NX	Yes	No	No	No	No/Unknown	Yes
＞3	≥40	Male	White	Married	≤20	Unknown	Positive	Ishak 5-6	T3	N0	No	No	No	No	No/Unknown	No/Unknown
＞3	≥40	Male	Others	Unknown	Unknown	Unknown	Positive	Unknown	T1	N0	No	No	Yes	No	No/Unknown	Yes
≤3	≥40	Male	White	Married	＞100	Unknown	Positive	Unknown	T3	N0	No	No	Yes	No	No/Unknown	No/Unknown
≤3	≥40	Male	White	Unmarried	Unknown	Unknown	Positive	Unknown	T4	N1	No	No	No	No	No/Unknown	No/Unknown
≤3	≥40	Male	White	Unmarried	Unknown	Unknown	Unknown	Unknown	TX	NX	No	No	Yes	No	No/Unknown	No/Unknown
＞3	≥40	Male	Others	Married	51~100	Unknown	Positive	Unknown	TX	N0	No	No	No	Local tumor destruction	No/Unknown	Yes
＞3	≥40	Female	White	Widowed	21~50	Unknown	Positive	Unknown	T2	NX	No	No	Yes	No	No/Unknown	Yes
≤3	≥40	Male	Others	Unmarried	Unknown	Grade III	Unknown	Ishak 0-4	T1	N0	No	No	Yes	No	Yes	No/Unknown
≤3	≥40	Female	White	Separated	＞100	Unknown	Unknown	Unknown	T1	N1	No	No	No	No	No/Unknown	No/Unknown
≤3	≥40	Male	White	Unmarried	＞100	Unknown	Unknown	Unknown	T4	N0	No	No	Yes	No	No/Unknown	No/Unknown
≤3	≥40	Male	Others	Married	≤20	Unknown	Positive	Unknown	T3	N0	Yes	No	No	No	No/Unknown	No/Unknown
＞3	≥40	Male	Others	Married	＞100	Unknown	Positive	Ishak 0-4	T4	N1	Unknown	Unknown	Unknown	No	No/Unknown	No/Unknown
＞3	≥40	Male	Others	Married	＞100	Unknown	Positive	Unknown	T4	N1	No	No	No	No	No/Unknown	No/Unknown
≤3	≥40	Male	Others	Married	＞100	Unknown	Positive	Unknown	T3	N0	No	No	Yes	No	No/Unknown	No/Unknown
＞3	≥40	Male	Black	Unknown	51~100	Grade II	Positive	Unknown	T3	N0	Yes	No	No	No	No/Unknown	Yes
＞3	≥40	Male	White	Married	＞100	Unknown	Positive	Ishak 5-6	T3	N1	Yes	No	No	No	Yes	Yes
≤3	≥40	Female	White	Unmarried	＞100	Unknown	Positive	Ishak 5-6	T3	N0	No	No	Yes	No	No/Unknown	Yes
＞3	≥40	Male	Others	Unknown	Unknown	Unknown	Unknown	Unknown	TX	NX	No	No	No	No	No/Unknown	No/Unknown
≤3	≥40	Female	Black	Married	21~50	Unknown	Positive	Unknown	T2	N0	Yes	No	No	No	No/Unknown	Yes
≤3	≥40	Male	White	Married	Unknown	Unknown	Positive	Unknown	T2	N0	No	No	Yes	No	No/Unknown	No/Unknown
≤3	≥40	Male	White	Unmarried	＞100	Grade III	Negative	Unknown	T3	N1	Yes	No	Yes	No	No/Unknown	Yes
＞3	≥40	Male	Black	Unmarried	＞100	Grade I	Unknown	Unknown	T3	N0	No	No	Yes	No	No/Unknown	No/Unknown
≤3	≥40	Male	Others	Married	51~100	Unknown	Positive	Ishak 5-6	T3	N1	Yes	Unknown	No	No	No/Unknown	No/Unknown
＞3	≥40	Male	Black	Unmarried	21~50	Grade II	Negative	Ishak 5-6	T1	N0	No	No	Yes	Lobectomy	No/Unknown	No/Unknown
＞3	≥40	Male	White	Unmarried	Unknown	Unknown	Unknown	Ishak 5-6	T3	N0	No	No	No	No	No/Unknown	Yes
＞3	≥40	Male	White	Married	21~50	Unknown	Negative	Unknown	T2	N0	No	No	No	No	No/Unknown	No/Unknown
≤3	≥40	Male	White	Separated	Unknown	Unknown	Positive	Unknown	TX	NX	Yes	No	No	No	Yes	No/Unknown
≤3	≥40	Male	Others	Unmarried	＞100	Unknown	Positive	Ishak 0-4	T1	N0	No	No	Yes	No	No/Unknown	No/Unknown
≤3	≥40	Female	Black	Unmarried	21~50	Unknown	Positive	Ishak 5-6	T3	N0	No	No	No	No	No/Unknown	No/Unknown
≤3	≥40	Male	Others	Married	Unknown	Unknown	Positive	Unknown	TX	N1	No	No	No	No	No/Unknown	No/Unknown
≤3	≥40	Male	White	Unmarried	Unknown	Unknown	Positive	Ishak 5-6	T3	N0	No	Yes	Yes	No	Yes	No/Unknown
＞3	≥40	Male	White	Married	＞100	Unknown	Unknown	Unknown	T1	N0	Yes	No	No	No	Yes	Yes
＞3	≥40	Male	Others	Married	51~100	Grade II	Positive	Unknown	T1	NX	Yes	No	No	No	No/Unknown	No/Unknown
≤3	≥40	Male	White	Married	51~100	Grade III	Positive	Ishak 5-6	T3	N1	No	No	No	No	No/Unknown	No/Unknown
＞3	≥40	Male	Others	Married	51~100	Unknown	Positive	Ishak 0-4	T3	N1	No	No	Yes	No	No/Unknown	No/Unknown
＞3	≥40	Male	White	Divorced	21~50	Unknown	Negative	Ishak 5-6	T1	N0	Yes	No	No	No	Yes	Yes
≤3	≥40	Female	Others	Widowed	21~50	Unknown	Positive	Ishak 5-6	T1	N1	No	No	Yes	No	No/Unknown	No/Unknown
≤3	≥40	Male	Others	Unmarried	Unknown	Unknown	Positive	Ishak 0-4	T1	N0	Yes	Yes	No	No	Yes	No/Unknown
≤3	≥40	Male	White	Unmarried	＞100	Unknown	Positive	Ishak 5-6	T3	N0	No	No	No	No	No/Unknown	No/Unknown
≤3	≥40	Female	Black	Married	Unknown	Unknown	Unknown	Unknown	TX	NX	No	No	Yes	No	No/Unknown	No/Unknown
≤3	≥40	Male	Others	Married	51~100	Unknown	Unknown	Unknown	T3	N0	No	No	Yes	No	No/Unknown	Yes
＞3	≥40	Male	White	Unknown	Unknown	Unknown	Positive	Unknown	T1	N0	Yes	No	No	No	No/Unknown	Yes
≤3	≥40	Male	White	Widowed	51~100	Unknown	Positive	Ishak 5-6	T3	N0	Yes	No	Yes	No	Yes	No/Unknown
＞3	≥40	Male	Others	Married	51~100	Unknown	Positive	Unknown	T1	N0	No	No	Yes	No	No/Unknown	Yes
＞3	≥40	Male	White	Unmarried	Unknown	Unknown	Positive	Ishak 5-6	T3	N0	No	No	Yes	No	No/Unknown	No/Unknown
＞3	＜40	Female	Others	Married	＞100	Grade III	Negative	Unknown	T1	N1	No	No	No	No	No/Unknown	No/Unknown
≤3	≥40	Male	Others	Married	＞100	Unknown	Positive	Unknown	T4	N0	No	No	Yes	No	No/Unknown	No/Unknown
≤3	≥40	Male	Others	Unknown	＞100	Unknown	Positive	Unknown	T3	NX	No	No	Yes	No	No/Unknown	No/Unknown
≤3	≥40	Female	Others	Unknown	Unknown	Unknown	Positive	Unknown	TX	N0	No	No	Yes	No	No/Unknown	No/Unknown
≤3	≥40	Female	Others	Widowed	Unknown	Unknown	Positive	Ishak 5-6	TX	NX	No	No	Yes	No	No/Unknown	No/Unknown
≤3	≥40	Male	White	Married	51~100	Unknown	Unknown	Unknown	T3	N0	Yes	No	No	No	Yes	No/Unknown
≤3	≥40	Male	Others	Unmarried	51~100	Unknown	Positive	Ishak 0-4	T3	NX	Yes	No	Yes	No	No/Unknown	No/Unknown
≤3	≥40	Female	Others	Widowed	21~50	Unknown	Positive	Unknown	T3	N0	No	No	No	No	No/Unknown	No/Unknown
≤3	≥40	Male	Black	Unmarried	＞100	Unknown	Positive	Unknown	T1	N0	No	No	Yes	No	No/Unknown	No/Unknown
≤3	≥40	Male	White	Married	Unknown	Unknown	Unknown	Ishak 0-4	T1	N1	No	No	Yes	No	No/Unknown	No/Unknown
≤3	≥40	Male	Others	Married	≤20	Grade II	Positive	Unknown	T3	N1	No	No	Yes	No	No/Unknown	Yes
≤3	≥40	Male	White	Unmarried	51~100	Unknown	Positive	Unknown	TX	N0	No	No	Yes	No	No/Unknown	No/Unknown
＞3	≥40	Female	Black	Divorced	Unknown	Grade II	Unknown	Ishak 0-4	T1	N0	Yes	No	No	Local tumor destruction	Yes	No/Unknown
≤3	≥40	Male	Others	Unmarried	≤20	Grade III	Negative	Unknown	T1	N0	No	No	No	No	No/Unknown	No/Unknown
＞3	≥40	Male	Black	Married	Unknown	Unknown	Positive	Unknown	T4	N0	No	No	No	No	Yes	Yes
＞3	≥40	Male	White	Married	51~100	Grade III	Positive	Ishak 5-6	T3	N0	No	No	Yes	No	No/Unknown	Yes
≤3	≥40	Male	White	Married	Unknown	Grade II	Positive	Unknown	T1	N0	No	No	No	No	No/Unknown	No/Unknown
≤3	≥40	Male	Others	Married	Unknown	Unknown	Positive	Ishak 0-4	T4	N0	No	No	Yes	No	No/Unknown	Yes
≤3	≥40	Male	White	Divorced	Unknown	Unknown	Positive	Unknown	T2	N1	Unknown	Unknown	Yes	No	No/Unknown	No/Unknown
≤3	≥40	Male	White	Widowed	＞100	Unknown	Unknown	Unknown	T3	NX	Unknown	Unknown	Unknown	No	No/Unknown	No/Unknown
≤3	≥40	Male	Others	Unknown	51~100	Unknown	Unknown	Unknown	T1	N1	Unknown	Unknown	Unknown	No	No/Unknown	No/Unknown
≤3	≥40	Male	Others	Married	Unknown	Unknown	Negative	Ishak 5-6	T3	N1	No	No	Yes	No	No/Unknown	Yes
≤3	≥40	Male	Others	Married	51~100	Unknown	Positive	Unknown	T3	NX	No	No	Yes	No	No/Unknown	No/Unknown
≤3	≥40	Male	White	Married	＞100	Grade III	Positive	Unknown	T3	NX	No	No	No	No	No/Unknown	No/Unknown
≤3	≥40	Female	White	Unmarried	Unknown	Unknown	Unknown	Unknown	TX	N0	Yes	No	Yes	No	No/Unknown	No/Unknown
≤3	≥40	Male	Others	Married	Unknown	Unknown	Unknown	Ishak 5-6	T4	N0	No	No	Yes	No	No/Unknown	No/Unknown
＞3	≥40	Male	White	Married	51~100	Unknown	Positive	Unknown	T3	N0	Yes	No	No	No	No/Unknown	Yes
＞3	≥40	Male	White	Married	＞100	Grade I	Negative	Unknown	T3	N0	Yes	No	No	No	Yes	Yes
＞3	≥40	Male	White	Divorced	Unknown	Unknown	Positive	Ishak 5-6	TX	N0	Yes	No	No	No	No/Unknown	No/Unknown
≤3	≥40	Male	Others	Married	＞100	Grade II	Positive	Ishak 5-6	T1	N0	No	No	Yes	No	No/Unknown	No/Unknown
≤3	≥40	Male	Others	Married	＞100	Unknown	Unknown	Unknown	T3	N0	No	No	Yes	No	No/Unknown	No/Unknown
≤3	≥40	Male	Others	Married	＞100	Unknown	Unknown	Unknown	TX	NX	No	No	Yes	No	No/Unknown	No/Unknown
≤3	≥40	Male	White	Married	Unknown	Unknown	Unknown	Ishak 5-6	TX	NX	Yes	No	No	No	No/Unknown	No/Unknown
＞3	≥40	Male	Black	Unmarried	＞100	Unknown	Unknown	Ishak 5-6	T3	N0	No	No	Yes	No	No/Unknown	Yes
≤3	≥40	Male	White	Married	≤20	Unknown	Positive	Ishak 0-4	T2	N1	Yes	No	Yes	No	Yes	No/Unknown
＞3	≥40	Male	White	Married	＞100	Grade III	Positive	Ishak 5-6	T3	N0	No	No	No	No	Yes	Yes
≤3	≥40	Male	White	Unknown	21~50	Unknown	Negative	Unknown	T2	N0	Yes	No	No	No	No/Unknown	No/Unknown
＞3	≥40	Male	Black	Unmarried	51~100	Unknown	Positive	Ishak 0-4	T3	N1	No	No	No	No	No/Unknown	No/Unknown
≤3	≥40	Male	Others	Married	21~50	Grade III	Positive	Ishak 5-6	T2	N0	Yes	No	No	No	Yes	No/Unknown
＞3	≥40	Male	White	Married	51~100	Unknown	Positive	Unknown	T1	NX	No	No	Yes	No	No/Unknown	Yes
≤3	≥40	Male	Others	Married	＞100	Unknown	Positive	Unknown	T3	N0	No	No	Yes	No	No/Unknown	No/Unknown
≤3	≥40	Male	White	Unknown	Unknown	Unknown	Negative	Unknown	TX	NX	Yes	No	Yes	No	No/Unknown	No/Unknown
≤3	≥40	Male	Others	Unknown	Unknown	Unknown	Positive	Ishak 5-6	TX	N1	No	No	Yes	No	No/Unknown	No/Unknown
≤3	≥40	Male	Others	Unknown	51~100	Unknown	Positive	Unknown	T1	N0	Yes	No	No	No	Yes	No/Unknown
≤3	≥40	Female	Black	Married	Unknown	Grade II	Positive	Unknown	TX	N1	No	No	No	No	No/Unknown	Yes
≤3	≥40	Male	Black	Unmarried	51~100	Unknown	Positive	Unknown	T3	N0	No	No	Yes	No	No/Unknown	Yes
≤3	≥40	Male	Black	Unmarried	Unknown	Unknown	Unknown	Unknown	T1	N1	Yes	No	No	No	Yes	No/Unknown
≤3	≥40	Male	White	Divorced	51~100	Unknown	Unknown	Unknown	T3	N0	Yes	No	No	No	No/Unknown	No/Unknown
＞3	≥40	Male	White	Married	51~100	Unknown	Negative	Unknown	T1	N0	Yes	No	Unknown	No	Yes	No/Unknown
≤3	≥40	Female	Others	Widowed	21~50	Unknown	Positive	Unknown	T2	N0	No	No	No	No	No/Unknown	No/Unknown
≤3	＜40	Male	Others	Married	＞100	Unknown	Positive	Unknown	T3	N0	No	No	Yes	No	No/Unknown	No/Unknown
≤3	≥40	Male	White	Unmarried	51~100	Unknown	Negative	Ishak 5-6	T3	N1	Yes	No	No	No	No/Unknown	No/Unknown
≤3	≥40	Male	White	Separated	51~100	Grade III	Positive	Unknown	T1	N1	No	No	No	No	No/Unknown	No/Unknown
≤3	≥40	Male	Black	Unmarried	Unknown	Grade II	Positive	Unknown	T3	N0	No	No	No	No	No/Unknown	No/Unknown
≤3	≥40	Male	Black	Divorced	＞100	Unknown	Positive	Ishak 5-6	T3	N0	No	No	Yes	No	No/Unknown	No/Unknown
＞3	≥40	Male	Others	Married	51~100	Unknown	Positive	Ishak 0-4	T1	N0	Yes	No	No	No	Yes	Yes
＞3	≥40	Male	Black	Separated	51~100	Unknown	Positive	Unknown	T4	N1	Yes	No	No	No	No/Unknown	No/Unknown
≤3	≥40	Male	Others	Widowed	51~100	Unknown	Negative	Unknown	T3	N0	No	No	Yes	No	No/Unknown	No/Unknown
≤3	≥40	Male	White	Unmarried	21~50	Unknown	Positive	Unknown	T1	N0	No	No	No	No	No/Unknown	No/Unknown
≤3	≥40	Male	Black	Divorced	Unknown	Grade III	Unknown	Unknown	T1	N0	Yes	No	Yes	No	Yes	No/Unknown
＞3	＜40	Female	White	Unmarried	＞100	Unknown	Positive	Unknown	T3	N0	No	No	Yes	No	Yes	Yes
≤3	≥40	Male	White	Married	Unknown	Unknown	Positive	Unknown	T1	N0	No	No	Yes	No	No/Unknown	Yes
＞3	≥40	Male	White	Married	51~100	Grade I	Negative	Unknown	T3	N0	Yes	No	Yes	No	Yes	Yes
＞3	≥40	Male	Black	Married	Unknown	Unknown	Positive	Ishak 0-4	T3	N1	No	No	No	No	No/Unknown	Yes
≤3	≥40	Male	Others	Married	21~50	Grade I	Negative	Ishak 0-4	T2	N0	No	No	No	No	No/Unknown	Yes
≤3	≥40	Male	Black	Separated	Unknown	Unknown	Positive	Unknown	TX	N0	Yes	No	No	No	No/Unknown	No/Unknown
＞3	≥40	Male	Black	Unmarried	＞100	Unknown	Positive	Unknown	T3	N1	Yes	No	Yes	No	No/Unknown	Yes
≤3	≥40	Male	White	Divorced	Unknown	Unknown	Unknown	Unknown	T4	NX	Unknown	Unknown	Unknown	No	No/Unknown	No/Unknown
＞3	≥40	Male	White	Unmarried	51~100	Unknown	Positive	Ishak 0-4	T3	N1	Unknown	Unknown	Unknown	No	No/Unknown	No/Unknown
＞3	≥40	Male	White	Divorced	Unknown	Unknown	Positive	Ishak 5-6	TX	N0	Yes	No	No	No	No/Unknown	No/Unknown
≤3	≥40	Male	Others	Married	≤20	Unknown	Unknown	Unknown	T1	N0	Yes	No	No	No	No/Unknown	No/Unknown
≤3	≥40	Male	White	Unmarried	Unknown	Grade II	Positive	Unknown	TX	N0	No	No	No	No	No/Unknown	No/Unknown
≤3	≥40	Male	White	Divorced	Unknown	Unknown	Positive	Unknown	TX	N1	No	No	Yes	No	No/Unknown	No/Unknown
＞3	≥40	Male	White	Unmarried	51~100	Unknown	Positive	Ishak 5-6	T1	N0	No	No	Yes	No	No/Unknown	No/Unknown
＞3	≥40	Male	Black	Unmarried	21~50	Unknown	Positive	Ishak 5-6	T3	N0	No	No	No	No	No/Unknown	Yes
≤3	≥40	Male	Others	Married	Unknown	Unknown	Positive	Unknown	T1	N0	No	No	Yes	No	No/Unknown	No/Unknown
＞3	≥40	Male	White	Married	＞100	Unknown	Positive	Unknown	T1	N0	Unknown	Unknown	Unknown	No	No/Unknown	No/Unknown
＞3	≥40	Male	White	Unmarried	21~50	Unknown	Unknown	Unknown	T1	N0	Yes	No	No	No	No/Unknown	No/Unknown
＞3	＜40	Male	Others	Married	Unknown	Unknown	Positive	Ishak 5-6	T3	N0	No	No	Yes	No	No/Unknown	Yes
≤3	≥40	Male	Black	Married	Unknown	Unknown	Positive	Ishak 5-6	T4	N0	No	No	Yes	No	No/Unknown	No/Unknown
≤3	≥40	Male	White	Married	51~100	Unknown	Positive	Unknown	T3	N0	No	No	No	No	No/Unknown	No/Unknown
≤3	≥40	Female	White	Unmarried	＞100	Unknown	Unknown	Unknown	TX	NX	No	No	Yes	No	No/Unknown	No/Unknown
≤3	≥40	Male	Others	Married	21~50	Unknown	Positive	Ishak 5-6	T3	N0	No	No	No	No	No/Unknown	Yes
≤3	≥40	Male	White	Separated	Unknown	Unknown	Positive	Unknown	T3	N0	Yes	No	No	No	No/Unknown	No/Unknown
≤3	≥40	Male	Others	Unmarried	＞100	Unknown	Unknown	Unknown	T3	N0	Yes	No	No	No	No/Unknown	No/Unknown
≤3	≥40	Male	Others	Unmarried	Unknown	Unknown	Positive	Ishak 0-4	T3	N1	No	No	Yes	No	No/Unknown	No/Unknown
＞3	≥40	Male	Others	Married	Unknown	Grade I	Positive	Unknown	TX	N0	No	No	No	No	No/Unknown	No/Unknown
≤3	≥40	Male	White	Widowed	51~100	Unknown	Positive	Unknown	T3	N0	No	No	No	No	No/Unknown	No/Unknown
＞3	≥40	Male	Others	Married	51~100	Unknown	Positive	Unknown	T4	N0	No	No	No	Local tumor destruction	No/Unknown	Yes
≤3	≥40	Male	White	Unknown	Unknown	Unknown	Positive	Unknown	TX	N0	Yes	No	No	No	No/Unknown	No/Unknown
≤3	≥40	Male	White	Divorced	Unknown	Unknown	Unknown	Unknown	T4	NX	No	No	Yes	No	No/Unknown	No/Unknown
≤3	≥40	Male	White	Married	21~50	Unknown	Positive	Unknown	T1	N0	Yes	No	No	No	Yes	Yes
≤3	≥40	Male	Others	Married	＞100	Unknown	Positive	Unknown	T3	N1	No	No	Yes	No	No/Unknown	Yes
≤3	≥40	Male	White	Married	51~100	Unknown	Positive	Ishak 5-6	T3	N1	No	No	No	No	No/Unknown	No/Unknown
＞3	≥40	Male	White	Unmarried	21~50	Grade III	Positive	Unknown	T2	N0	Yes	No	No	No	No/Unknown	Yes
＞3	≥40	Male	White	Unmarried	＞100	Grade III	Negative	Unknown	T4	N1	No	No	No	No	No/Unknown	Yes
＞3	≥40	Male	White	Married	Unknown	Unknown	Positive	Unknown	TX	N1	No	No	No	No	No/Unknown	Yes
≤3	≥40	Male	Black	Unmarried	＞100	Unknown	Positive	Ishak 5-6	T3	N1	No	Yes	Yes	No	Yes	No/Unknown
≤3	≥40	Male	White	Married	≤20	Unknown	Unknown	Ishak 5-6	T1	N1	No	No	No	No	No/Unknown	No/Unknown
≤3	≥40	Male	Others	Unmarried	Unknown	Unknown	Unknown	Unknown	TX	NX	No	No	Yes	No	No/Unknown	No/Unknown
≤3	≥40	Male	Black	Unmarried	＞100	Unknown	Positive	Ishak 0-4	T1	N1	No	No	No	No	No/Unknown	Yes
＞3	≥40	Male	White	Separated	21~50	Unknown	Positive	Unknown	T1	N0	No	No	No	No	No/Unknown	Yes
≤3	≥40	Male	Black	Unmarried	51~100	Unknown	Positive	Ishak 5-6	T1	N0	Yes	No	No	No	No/Unknown	No/Unknown
≤3	≥40	Male	Others	Married	Unknown	Unknown	Positive	Unknown	TX	NX	No	No	Yes	No	No/Unknown	No/Unknown
＞3	≥40	Male	White	Separated	51~100	Unknown	Negative	Ishak 5-6	T1	N0	No	No	No	No	No/Unknown	No/Unknown
≤3	≥40	Male	Black	Married	21~50	Unknown	Positive	Unknown	T2	N0	No	No	No	No	No/Unknown	No/Unknown
≤3	≥40	Male	White	Married	51~100	Unknown	Unknown	Unknown	T3	N1	Yes	No	No	No	No/Unknown	No/Unknown
≤3	≥40	Male	White	Unmarried	51~100	Unknown	Positive	Unknown	T2	N1	No	No	Yes	No	No/Unknown	No/Unknown
＞3	≥40	Male	White	Unmarried	21~50	Grade II	Unknown	Unknown	T2	N0	Yes	Yes	Yes	No	Yes	No/Unknown
≤3	≥40	Female	White	Widowed	＞100	Unknown	Unknown	Ishak 0-4	T1	N0	No	No	Yes	No	No/Unknown	No/Unknown
≤3	≥40	Male	White	Unmarried	≤20	Unknown	Positive	Unknown	T1	N0	No	No	Yes	No	No/Unknown	No/Unknown
≤3	≥40	Male	Black	Unmarried	≤20	Unknown	Positive	Unknown	T1	N0	Yes	No	Yes	No	Yes	No/Unknown
≤3	≥40	Female	Others	Married	Unknown	Unknown	Unknown	Unknown	TX	NX	No	No	Yes	No	No/Unknown	No/Unknown
＞3	≥40	Male	White	Married	51~100	Grade II	Positive	Ishak 5-6	T3	N1	No	No	Yes	No	No/Unknown	Yes
≤3	≥40	Male	White	Unmarried	51~100	Grade I	Positive	Unknown	T1	N0	No	No	Yes	No	No/Unknown	No/Unknown
≤3	＜40	Male	White	Unmarried	Unknown	Unknown	Unknown	Unknown	TX	N0	No	No	Yes	No	Yes	No/Unknown
≤3	≥40	Male	White	Widowed	≤20	Grade I	Positive	Unknown	T4	NX	Yes	Unknown	Unknown	No	No/Unknown	No/Unknown
≤3	＜40	Male	Others	Married	＞100	Grade III	Positive	Unknown	T3	N0	No	No	Yes	No	No/Unknown	No/Unknown
≤3	≥40	Female	White	Unmarried	Unknown	Unknown	Unknown	Unknown	TX	N0	Yes	No	Yes	No	No/Unknown	No/Unknown
≤3	≥40	Male	Black	Unmarried	≤20	Unknown	Positive	Unknown	T2	N1	No	No	Yes	No	No/Unknown	No/Unknown
≤3	≥40	Male	White	Unmarried	51~100	Unknown	Positive	Ishak 0-4	T3	N1	No	No	Yes	No	No/Unknown	No/Unknown
≤3	≥40	Male	Black	Unmarried	≤20	Grade II	Unknown	Unknown	T1	N0	Yes	Yes	Yes	No	No/Unknown	No/Unknown
≤3	≥40	Male	Black	Unmarried	21~50	Unknown	Positive	Unknown	T3	N1	No	No	No	No	No/Unknown	No/Unknown
＞3	≥40	Male	Others	Married	Unknown	Grade III	Positive	Ishak 0-4	T4	N0	No	No	Yes	No	Yes	Yes
≤3	≥40	Male	White	Married	Unknown	Unknown	Unknown	Unknown	TX	NX	No	No	No	No	No/Unknown	No/Unknown
＞3	≥40	Male	White	Unmarried	Unknown	Unknown	Positive	Unknown	TX	N1	Unknown	Unknown	Yes	No	No/Unknown	No/Unknown
＞3	≥40	Male	Others	Married	＞100	Grade I	Positive	Ishak 0-4	T3	N0	No	No	Yes	No	No/Unknown	No/Unknown
＞3	≥40	Male	White	Widowed	21~50	Unknown	Positive	Unknown	T3	N1	No	No	Yes	No	No/Unknown	No/Unknown
≤3	≥40	Male	White	Divorced	51~100	Grade II	Positive	Ishak 5-6	T3	N0	No	No	Yes	No	No/Unknown	No/Unknown
≤3	≥40	Male	White	Unmarried	21~50	Unknown	Positive	Unknown	T2	N1	Yes	No	No	No	No/Unknown	No/Unknown
≤3	≥40	Male	Others	Married	＞100	Unknown	Positive	Unknown	T3	N0	Yes	No	Yes	No	No/Unknown	No/Unknown
＞3	≥40	Male	White	Widowed	Unknown	Grade II	Positive	Unknown	T1	N0	No	No	Yes	No	No/Unknown	No/Unknown
≤3	≥40	Male	Others	Widowed	＞100	Unknown	Positive	Unknown	T4	N1	No	No	No	No	No/Unknown	No/Unknown
＞3	≥40	Male	Others	Married	Unknown	Unknown	Positive	Unknown	T4	NX	Yes	No	No	No	Yes	No/Unknown
＞3	≥40	Female	Others	Married	51~100	Unknown	Positive	Ishak 5-6	T3	N0	No	No	No	No	No/Unknown	Yes
＞3	≥40	Male	White	Married	51~100	Unknown	Positive	Unknown	TX	N0	No	No	No	No	No/Unknown	No/Unknown
≤3	≥40	Male	White	Married	Unknown	Unknown	Positive	Unknown	T3	N0	Yes	No	No	No	No/Unknown	Yes
≤3	≥40	Male	White	Unmarried	＞100	Unknown	Positive	Ishak 5-6	T3	N1	No	No	No	No	No/Unknown	Yes
≤3	≥40	Male	Others	Married	＞100	Grade II	Unknown	Unknown	T3	N0	No	No	Yes	No	No/Unknown	No/Unknown
≤3	≥40	Male	White	Married	51~100	Grade I	Negative	Unknown	T1	N0	Yes	No	Yes	No	No/Unknown	No/Unknown
＞3	≥40	Male	White	Married	51~100	Grade III	Positive	Ishak 0-4	T1	N0	Yes	No	No	No	Yes	Yes
≤3	≥40	Male	White	Widowed	51~100	Unknown	Positive	Ishak 0-4	T3	N0	No	No	No	No	No/Unknown	Yes
≤3	≥40	Male	Black	Married	＞100	Unknown	Positive	Unknown	T3	N1	No	No	No	No	No/Unknown	No/Unknown
＞3	≥40	Male	White	Unmarried	51~100	Unknown	Negative	Ishak 5-6	T3	N0	Yes	No	No	No	Yes	No/Unknown
≤3	≥40	Male	Others	Divorced	＞100	Unknown	Negative	Ishak 5-6	T3	N0	No	No	No	No	No/Unknown	No/Unknown
＞3	≥40	Female	Others	Married	51~100	Grade III	Negative	Unknown	T4	N0	No	No	No	Lobectomy	No/Unknown	No/Unknown
≤3	≥40	Male	White	Unmarried	＞100	Unknown	Positive	Unknown	T3	N0	No	No	Yes	No	No/Unknown	No/Unknown
≤3	≥40	Female	White	Divorced	Unknown	Unknown	Positive	Unknown	T3	N0	Yes	No	Yes	No	No/Unknown	Yes
≤3	≥40	Female	White	Married	51~100	Grade I	Negative	Unknown	T4	N0	No	No	Yes	No	No/Unknown	Yes
＞3	≥40	Male	White	Unmarried	51~100	Unknown	Negative	Unknown	T3	N1	No	No	No	No	No/Unknown	Yes
≤3	≥40	Female	White	Widowed	Unknown	Unknown	Unknown	Unknown	TX	N0	No	No	No	No	No/Unknown	No/Unknown
≤3	≥40	Female	Others	Married	＞100	Grade II	Positive	Ishak 0-4	T3	N0	No	No	No	No	No/Unknown	No/Unknown
≤3	≥40	Male	Others	Unmarried	51~100	Unknown	Positive	Ishak 0-4	T3	N0	No	No	No	No	No/Unknown	No/Unknown
≤3	≥40	Male	White	Widowed	Unknown	Unknown	Positive	Unknown	TX	N0	No	No	Yes	No	No/Unknown	No/Unknown
≤3	≥40	Male	Others	Married	Unknown	Unknown	Positive	Unknown	TX	NX	No	No	No	No	No/Unknown	No/Unknown
≤3	≥40	Female	Black	Unmarried	51~100	Unknown	Positive	Ishak 0-4	T2	N1	Yes	No	No	No	Yes	No/Unknown
≤3	≥40	Male	Others	Married	＞100	Unknown	Positive	Unknown	T3	N0	No	No	Yes	No	No/Unknown	No/Unknown
≤3	≥40	Female	Others	Widowed	21~50	Unknown	Negative	Ishak 5-6	T2	N0	No	No	Yes	No	No/Unknown	No/Unknown
＞3	≥40	Male	White	Widowed	Unknown	Grade II	Positive	Unknown	T1	N1	Yes	No	No	No	Yes	Yes
≤3	≥40	Male	Others	Married	＞100	Unknown	Positive	Unknown	T3	N0	Yes	No	Yes	No	No/Unknown	No/Unknown
≤3	≥40	Male	Black	Married	51~100	Unknown	Positive	Unknown	T4	N1	No	No	Yes	No	No/Unknown	No/Unknown
＞3	≥40	Male	Others	Married	51~100	Grade III	Negative	Unknown	T1	N1	No	No	No	No	No/Unknown	Yes
＞3	≥40	Male	Others	Married	＞100	Unknown	Positive	Unknown	T3	NX	No	No	Yes	No	No/Unknown	Yes
＞3	≥40	Male	Others	Married	Unknown	Unknown	Unknown	Unknown	TX	N0	Yes	No	No	No	No/Unknown	Yes
＞3	≥40	Male	White	Married	51~100	Unknown	Unknown	Ishak 5-6	T1	N0	No	No	Yes	No	Yes	No/Unknown
≤3	≥40	Male	Others	Married	51~100	Unknown	Positive	Ishak 5-6	T3	N0	Yes	No	No	No	No/Unknown	No/Unknown
≤3	≥40	Male	Others	Unmarried	Unknown	Unknown	Positive	Ishak 5-6	T4	N0	No	No	No	No	No/Unknown	No/Unknown
≤3	≥40	Male	White	Unmarried	Unknown	Unknown	Unknown	Unknown	TX	NX	No	No	Yes	No	No/Unknown	No/Unknown
≤3	≥40	Male	Black	Unmarried	＞100	Unknown	Unknown	Unknown	T3	N0	No	No	Yes	No	No/Unknown	No/Unknown
＞3	≥40	Female	White	Divorced	51~100	Grade I	Negative	Unknown	T3	N0	No	No	Yes	No	No/Unknown	No/Unknown
≤3	≥40	Male	Others	Married	51~100	Unknown	Negative	Unknown	T1	N0	No	Yes	No	No	No/Unknown	No/Unknown
＞3	≥40	Female	Others	Widowed	21~50	Unknown	Positive	Ishak 5-6	T3	N0	No	No	Yes	No	No/Unknown	Yes
＞3	≥40	Male	Others	Married	51~100	Unknown	Positive	Ishak 0-4	T3	N0	Yes	No	No	No	Yes	Yes
＞3	≥40	Male	White	Unmarried	51~100	Unknown	Positive	Unknown	T3	NX	Yes	No	No	No	Yes	Yes
＞3	≥40	Male	Others	Unmarried	21~50	Unknown	Negative	Ishak 5-6	T3	N0	No	No	Yes	No	No/Unknown	Yes
＞3	≥40	Male	White	Divorced	51~100	Unknown	Positive	Unknown	T3	NX	Unknown	Unknown	Unknown	No	No/Unknown	No/Unknown
≤3	≥40	Male	Others	Married	Unknown	Unknown	Positive	Unknown	TX	N0	Yes	No	No	No	Yes	Yes
＞3	≥40	Male	Black	Separated	51~100	Unknown	Positive	Ishak 5-6	T3	N0	Yes	No	No	No	Yes	No/Unknown
≤3	＜40	Male	Black	Unmarried	Unknown	Grade III	Positive	Unknown	TX	N0	No	No	Yes	No	No/Unknown	No/Unknown
≤3	≥40	Female	White	Divorced	51~100	Unknown	Unknown	Ishak 5-6	T3	N1	Unknown	No	Unknown	No	No/Unknown	No/Unknown
≤3	≥40	Male	Black	Unmarried	21~50	Unknown	Positive	Unknown	T2	N0	Yes	No	No	No	Yes	No/Unknown
≤3	≥40	Male	White	Unmarried	Unknown	Unknown	Positive	Ishak 5-6	T3	N0	No	No	Yes	No	No/Unknown	No/Unknown
≤3	≥40	Female	Others	Married	＞100	Unknown	Positive	Unknown	T1	N1	No	Yes	No	No	No/Unknown	No/Unknown
＞3	≥40	Male	White	Unmarried	51~100	Unknown	Unknown	Unknown	T3	N0	Yes	No	No	No	No/Unknown	Yes
＞3	≥40	Female	White	Married	51~100	Unknown	Positive	Unknown	T3	N0	No	No	Yes	No	No/Unknown	No/Unknown
≤3	≥40	Female	Black	Widowed	51~100	Unknown	Negative	Ishak 5-6	T3	N0	No	No	Yes	No	No/Unknown	No/Unknown
＞3	≥40	Male	White	Married	Unknown	Unknown	Negative	Ishak 5-6	TX	N1	No	No	Yes	No	No/Unknown	Yes
＞3	≥40	Male	White	Unmarried	≤20	Unknown	Positive	Unknown	T3	N1	No	Unknown	No	No	No/Unknown	Yes
＞3	≥40	Male	Black	Separated	51~100	Unknown	Positive	Unknown	T3	N0	Yes	No	No	No	Yes	Yes
＞3	≥40	Male	White	Unknown	21~50	Unknown	Positive	Unknown	T2	N0	No	No	No	No	No/Unknown	Yes
≤3	≥40	Male	Others	Divorced	21~50	Unknown	Positive	Ishak 5-6	T1	N0	No	No	No	No	No/Unknown	No/Unknown
＞3	≥40	Male	White	Unmarried	51~100	Unknown	Positive	Unknown	T3	N1	No	No	No	No	No/Unknown	Yes
≤3	≥40	Male	White	Married	＞100	Unknown	Positive	Unknown	TX	NX	No	No	Yes	No	No/Unknown	No/Unknown
≤3	≥40	Male	Others	Unmarried	51~100	Grade III	Positive	Ishak 5-6	T1	N0	No	No	No	No	No/Unknown	No/Unknown
≤3	≥40	Male	White	Married	51~100	Unknown	Positive	Ishak 5-6	T3	N0	No	No	No	No	Yes	No/Unknown
≤3	≥40	Male	Others	Married	＞100	Unknown	Positive	Ishak 5-6	T3	N0	Yes	No	Yes	No	No/Unknown	Yes
＞3	≥40	Male	White	Unmarried	51~100	Unknown	Positive	Unknown	T1	N0	Yes	No	No	No	Yes	Yes
≤3	≥40	Female	Others	Married	51~100	Unknown	Positive	Ishak 0-4	T4	N0	No	No	No	No	No/Unknown	No/Unknown
＞3	≥40	Male	Black	Unmarried	Unknown	Grade III	Positive	Unknown	T1	N0	No	No	No	No	No/Unknown	Yes
≤3	≥40	Male	Others	Married	51~100	Unknown	Positive	Unknown	T3	N0	No	No	Yes	No	No/Unknown	No/Unknown
≤3	≥40	Male	Black	Unmarried	51~100	Unknown	Unknown	Unknown	T3	N0	No	No	No	No	No/Unknown	No/Unknown
＞3	≥40	Male	Others	Unmarried	21~50	Unknown	Positive	Unknown	T3	N1	Yes	No	Yes	No	Yes	Yes
≤3	≥40	Male	White	Married	＞100	Unknown	Positive	Ishak 5-6	T4	N1	No	No	Yes	No	No/Unknown	No/Unknown
≤3	≥40	Male	Others	Married	＞100	Unknown	Positive	Ishak 5-6	T3	N0	No	No	Yes	No	No/Unknown	Yes
≤3	≥40	Male	Others	Married	＞100	Unknown	Positive	Ishak 5-6	T3	N1	No	Unknown	Yes	No	No/Unknown	No/Unknown
＞3	≥40	Male	White	Married	51~100	Unknown	Negative	Unknown	T1	N0	No	No	Yes	No	No/Unknown	No/Unknown
≤3	≥40	Female	Others	Widowed	＞100	Unknown	Positive	Unknown	T3	N0	No	No	Yes	No	No/Unknown	No/Unknown
＞3	≥40	Male	Black	Unknown	51~100	Grade II	Unknown	Unknown	T3	N0	No	No	Yes	No	No/Unknown	No/Unknown
≤3	≥40	Male	White	Married	51~100	Unknown	Positive	Unknown	T3	NX	No	No	Yes	No	No/Unknown	Yes
≤3	≥40	Male	White	Unmarried	21~50	Unknown	Positive	Unknown	T1	N0	No	No	Yes	No	No/Unknown	No/Unknown
＞3	≥40	Male	Others	Unmarried	Unknown	Unknown	Unknown	Unknown	TX	NX	Unknown	No	Unknown	No	No/Unknown	No/Unknown
＞3	≥40	Male	Others	Married	≤20	Unknown	Positive	Unknown	T3	N0	No	No	No	No	Yes	Yes
＞3	≥40	Male	Black	Divorced	21~50	Unknown	Positive	Ishak 0-4	T2	N1	No	No	No	No	No/Unknown	Yes
＞3	≥40	Male	Black	Married	51~100	Unknown	Negative	Unknown	T3	N1	No	No	No	No	No/Unknown	Yes
＞3	≥40	Male	Others	Married	＞100	Unknown	Positive	Unknown	T3	N0	No	No	Yes	No	No/Unknown	Yes
≤3	≥40	Male	Others	Unmarried	51~100	Unknown	Positive	Unknown	T3	NX	No	No	Yes	No	No/Unknown	No/Unknown
≤3	＜40	Male	Black	Unmarried	Unknown	Unknown	Unknown	Unknown	TX	N0	No	No	Yes	No	No/Unknown	No/Unknown
≤3	≥40	Male	White	Unmarried	Unknown	Grade III	Unknown	Unknown	T1	N0	No	No	Yes	No	No/Unknown	No/Unknown
≤3	≥40	Female	White	Widowed	Unknown	Unknown	Unknown	Unknown	T3	NX	Yes	No	Unknown	No	No/Unknown	No/Unknown
≤3	≥40	Female	White	Married	＞100	Grade II	Positive	Unknown	T1	N0	No	No	Yes	No	No/Unknown	Yes
＞3	≥40	Female	White	Widowed	Unknown	Unknown	Unknown	Ishak 5-6	TX	NX	Yes	No	No	No	No/Unknown	Yes
＞3	≥40	Male	White	Unknown	Unknown	Unknown	Positive	Unknown	TX	N1	Yes	No	No	No	Yes	Yes
≤3	≥40	Male	White	Divorced	Unknown	Grade II	Unknown	Unknown	T3	NX	No	No	Yes	No	No/Unknown	No/Unknown
≤3	≥40	Male	White	Married	＞100	Unknown	Unknown	Unknown	T3	N0	Yes	No	No	No	No/Unknown	No/Unknown
≤3	≥40	Male	White	Married	Unknown	Grade II	Positive	Unknown	TX	N0	No	No	No	No	No/Unknown	Yes
≤3	≥40	Male	White	Married	＞100	Unknown	Negative	Unknown	T1	N0	No	Yes	Yes	No	No/Unknown	No/Unknown
＞3	≥40	Male	White	Married	21~50	Grade III	Unknown	Unknown	T1	NX	No	No	No	Wedge resection	No/Unknown	No/Unknown
≤3	≥40	Male	White	Divorced	＞100	Unknown	Positive	Unknown	T3	N1	No	No	No	Local tumor destruction	No/Unknown	Yes
≤3	≥40	Male	White	Married	Unknown	Unknown	Unknown	Unknown	TX	N0	Yes	No	Yes	No	No/Unknown	No/Unknown
≤3	≥40	Male	White	Married	Unknown	Unknown	Positive	Unknown	TX	N0	No	No	Yes	No	No/Unknown	No/Unknown
＞3	≥40	Female	White	Unmarried	≤20	Grade III	Negative	Unknown	TX	N0	No	No	Yes	Local tumor destruction	No/Unknown	No/Unknown
＞3	≥40	Male	White	Unmarried	21~50	Unknown	Unknown	Unknown	T1	N0	No	No	No	No	No/Unknown	Yes
≤3	≥40	Male	White	Widowed	＞100	Grade III	Positive	Unknown	T3	N0	Yes	No	No	No	Yes	No/Unknown
≤3	≥40	Male	Black	Married	Unknown	Unknown	Unknown	Unknown	TX	NX	Yes	No	Yes	No	No/Unknown	No/Unknown
≤3	≥40	Male	White	Married	Unknown	Grade I	Unknown	Unknown	TX	N1	No	No	No	No	No/Unknown	No/Unknown
≤3	≥40	Male	Black	Unmarried	Unknown	Unknown	Positive	Ishak 5-6	T3	N0	No	No	Yes	No	No/Unknown	No/Unknown
＞3	≥40	Male	White	Unmarried	Unknown	Grade I	Positive	Unknown	T4	N1	No	No	No	No	No/Unknown	Yes
＞3	≥40	Male	Others	Separated	51~100	Unknown	Positive	Unknown	T3	N0	No	No	No	No	No/Unknown	No/Unknown
≤3	≥40	Male	White	Unmarried	21~50	Grade I	Positive	Ishak 5-6	T2	N0	No	No	No	No	No/Unknown	No/Unknown
≤3	≥40	Male	White	Married	≤20	Grade II	Positive	Unknown	T4	NX	No	No	Yes	No	No/Unknown	No/Unknown
＞3	≥40	Male	Black	Unmarried	＞100	Unknown	Negative	Unknown	T3	N0	No	No	No	No	No/Unknown	Yes
＞3	≥40	Female	White	Divorced	21~50	Unknown	Unknown	Unknown	T1	N1	No	No	No	No	No/Unknown	No/Unknown
≤3	≥40	Male	White	Unmarried	＞100	Unknown	Unknown	Unknown	T3	N0	No	No	Yes	Local tumor destruction	No/Unknown	Yes
＞3	≥40	Female	White	Unmarried	21~50	Unknown	Positive	Unknown	T2	N0	No	No	Yes	Local tumor destruction	No/Unknown	Yes
≤3	≥40	Male	White	Married	＞100	Grade I	Positive	Unknown	T4	N0	No	No	Yes	No	No/Unknown	No/Unknown
≤3	≥40	Male	White	Married	51~100	Grade III	Positive	Unknown	T3	N0	No	No	Yes	No	No/Unknown	Yes
≤3	≥40	Male	White	Unmarried	Unknown	Unknown	Positive	Unknown	TX	N0	No	No	Yes	No	No/Unknown	No/Unknown
＞3	≥40	Male	White	Married	＞100	Unknown	Unknown	Unknown	T3	NX	Unknown	No	Unknown	No	No/Unknown	Yes
≤3	≥40	Male	Others	Married	Unknown	Unknown	Positive	Unknown	T4	N0	No	No	Yes	No	No/Unknown	No/Unknown
＞3	≥40	Male	White	Married	21~50	Grade II	Positive	Ishak 0-4	T2	N1	No	No	No	No	No/Unknown	Yes
＞3	≥40	Female	White	Married	Unknown	Unknown	Negative	Unknown	T2	N1	Yes	Yes	Yes	No	No/Unknown	No/Unknown
≤3	≥40	Male	Black	Unmarried	21~50	Grade III	Positive	Unknown	T4	NX	No	No	Yes	No	No/Unknown	Yes
≤3	≥40	Male	White	Unmarried	≤20	Unknown	Positive	Unknown	T3	N1	No	No	No	No	No/Unknown	Yes
≤3	≥40	Male	White	Unmarried	51~100	Unknown	Positive	Unknown	T3	N1	No	No	Yes	No	No/Unknown	No/Unknown
＞3	≥40	Male	Black	Unmarried	51~100	Unknown	Positive	Unknown	T3	N0	Yes	No	Unknown	No	No/Unknown	Yes
≤3	≥40	Male	White	Unmarried	51~100	Unknown	Positive	Unknown	T3	N0	No	No	No	No	No/Unknown	No/Unknown
＞3	＜40	Male	Black	Unmarried	51~100	Grade II	Positive	Unknown	T3	N1	Yes	No	No	No	No/Unknown	Yes
≤3	≥40	Male	White	Unmarried	Unknown	Unknown	Positive	Unknown	TX	N1	No	No	No	No	No/Unknown	Yes
≤3	≥40	Female	White	Widowed	≤20	Unknown	Unknown	Unknown	T4	N0	No	No	Yes	No	No/Unknown	No/Unknown
≤3	≥40	Male	White	Unmarried	51~100	Unknown	Positive	Unknown	T3	N1	No	No	Yes	No	No/Unknown	No/Unknown
＞3	≥40	Female	White	Divorced	51~100	Unknown	Positive	Unknown	TX	NX	Yes	No	No	No	Yes	Yes
≤3	≥40	Female	White	Married	51~100	Grade III	Unknown	Unknown	T1	N1	Yes	No	Yes	No	No/Unknown	Yes
≤3	≥40	Male	White	Married	Unknown	Unknown	Positive	Unknown	TX	N1	No	No	No	No	No/Unknown	No/Unknown
＞3	≥40	Male	White	Unmarried	51~100	Grade II	Positive	Unknown	T3	N0	Yes	No	No	No	Yes	Yes
＞3	≥40	Male	White	Widowed	＞100	Grade II	Negative	Unknown	T3	NX	No	No	Unknown	Wedge resection	No/Unknown	No/Unknown
≤3	≥40	Male	White	Unmarried	51~100	Unknown	Positive	Unknown	T3	N0	No	No	Yes	No	No/Unknown	No/Unknown
＞3	≥40	Male	White	Divorced	51~100	Grade I	Positive	Unknown	T3	N1	No	No	No	No	No/Unknown	Yes
≤3	≥40	Male	White	Married	21~50	Grade III	Positive	Unknown	T3	N1	Yes	No	No	No	Yes	Yes
≤3	≥40	Male	White	Divorced	Unknown	Unknown	Positive	Unknown	TX	N1	No	Unknown	Unknown	No	No/Unknown	No/Unknown
≤3	≥40	Male	Black	Unknown	＞100	Unknown	Positive	Unknown	T3	N1	No	No	No	No	No/Unknown	Yes
≤3	≥40	Male	White	Married	＞100	Grade III	Unknown	Unknown	T3	N1	No	No	No	No	No/Unknown	No/Unknown
＞3	≥40	Male	White	Married	51~100	Unknown	Negative	Unknown	T3	N0	Yes	No	No	No	No/Unknown	Yes
＞3	≥40	Male	White	Married	21~50	Grade III	Positive	Unknown	T2	N0	No	No	No	Local tumor destruction	No/Unknown	Yes
＞3	≥40	Male	Black	Unmarried	＞100	Unknown	Positive	Unknown	T4	N0	No	No	No	No	No/Unknown	No/Unknown
≤3	≥40	Male	White	Unmarried	51~100	Unknown	Negative	Unknown	T1	N1	No	No	No	No	No/Unknown	Yes
≤3	≥40	Male	Black	Married	21~50	Grade II	Unknown	Unknown	T3	N0	Yes	No	No	No	Yes	No/Unknown
＞3	≥40	Male	White	Unmarried	＞100	Grade II	Positive	Unknown	T3	N0	No	No	No	No	No/Unknown	No/Unknown
≤3	≥40	Female	White	Divorced	Unknown	Grade III	Positive	Unknown	TX	N0	Yes	No	No	No	Yes	No/Unknown
≤3	≥40	Male	White	Unmarried	Unknown	Unknown	Positive	Unknown	T3	N1	No	No	Yes	No	No/Unknown	No/Unknown
≤3	≥40	Male	White	Unmarried	21~50	Unknown	Positive	Unknown	T4	N1	No	No	No	No	No/Unknown	No/Unknown
≤3	≥40	Male	White	Married	Unknown	Unknown	Positive	Unknown	T3	N1	No	No	No	No	No/Unknown	Yes
≤3	≥40	Male	White	Married	21~50	Unknown	Positive	Unknown	T2	N0	No	No	No	No	No/Unknown	No/Unknown
≤3	≥40	Male	White	Married	＞100	Grade III	Positive	Unknown	T3	N1	No	No	Yes	No	No/Unknown	Yes
≤3	≥40	Female	White	Divorced	21~50	Unknown	Unknown	Unknown	T1	N1	No	No	Yes	No	No/Unknown	Yes
＞3	≥40	Female	White	Unmarried	Unknown	Unknown	Unknown	Unknown	TX	NX	No	Yes	Unknown	No	Yes	No/Unknown
≤3	≥40	Male	White	Married	Unknown	Grade I	Positive	Ishak 5-6	T3	N1	No	No	No	No	No/Unknown	No/Unknown
≤3	≥40	Male	White	Married	51~100	Unknown	Unknown	Unknown	T4	N0	No	No	No	No	No/Unknown	Yes
＞3	≥40	Male	White	Married	＞100	Unknown	Positive	Unknown	T4	N0	Yes	No	No	No	No/Unknown	Yes
＞3	≥40	Male	White	Unmarried	51~100	Unknown	Positive	Unknown	T3	N0	Yes	No	No	No	Yes	Yes
≤3	≥40	Male	White	Married	＞100	Grade II	Unknown	Ishak 0-4	T3	N1	Yes	No	No	No	Yes	Yes
＞3	≥40	Male	White	Married	Unknown	Unknown	Positive	Ishak 5-6	TX	N0	No	No	No	No	No/Unknown	Yes
≤3	≥40	Male	White	Married	Unknown	Unknown	Positive	Unknown	TX	N0	Yes	No	No	No	No/Unknown	No/Unknown
≤3	≥40	Male	Black	Married	21~50	Unknown	Positive	Unknown	T1	N0	Yes	No	No	No	No/Unknown	No/Unknown
≤3	≥40	Male	White	Married	≤20	Grade II	Positive	Unknown	T1	N0	Yes	No	No	No	Yes	No/Unknown
＞3	≥40	Male	White	Married	51~100	Grade I	Positive	Unknown	T1	N0	No	No	Yes	No	No/Unknown	Yes
≤3	≥40	Female	White	Widowed	≤20	Unknown	Positive	Unknown	T2	N1	Yes	No	Yes	No	No/Unknown	No/Unknown
≤3	≥40	Male	White	Unmarried	21~50	Grade II	Positive	Unknown	TX	N1	Yes	Unknown	Yes	No	No/Unknown	No/Unknown
≤3	≥40	Male	White	Divorced	21~50	Unknown	Positive	Unknown	T2	N0	Yes	No	Yes	No	Yes	No/Unknown
＞3	≥40	Male	Black	Unmarried	51~100	Grade III	Unknown	Unknown	T3	N0	No	Yes	No	No	No/Unknown	No/Unknown
≤3	≥40	Male	White	Married	Unknown	Unknown	Positive	Unknown	T1	NX	No	No	Yes	No	No/Unknown	No/Unknown
≤3	≥40	Female	White	Widowed	Unknown	Unknown	Positive	Unknown	TX	N1	No	No	Yes	No	No/Unknown	No/Unknown
≤3	≥40	Male	White	Unmarried	21~50	Unknown	Positive	Unknown	T3	N1	Yes	No	No	No	Yes	No/Unknown
≤3	≥40	Male	White	Married	51~100	Unknown	Positive	Unknown	T3	N1	No	No	No	No	No/Unknown	No/Unknown
＞3	≥40	Male	White	Separated	21~50	Grade II	Negative	Ishak 0-4	T1	N0	No	No	No	Local tumor destruction	No/Unknown	No/Unknown
≤3	≥40	Male	White	Unmarried	51~100	Grade III	Negative	Unknown	T3	N1	Yes	No	Yes	No	Yes	No/Unknown
≤3	≥40	Male	Others	Married	51~100	Unknown	Positive	Unknown	T3	N1	No	No	Yes	No	No/Unknown	Yes
≤3	≥40	Male	Black	Unmarried	＞100	Unknown	Positive	Unknown	T3	N0	No	No	Yes	No	No/Unknown	No/Unknown
≤3	≥40	Male	White	Married	51~100	Unknown	Positive	Unknown	T3	N1	No	No	No	No	No/Unknown	No/Unknown
≤3	≥40	Male	White	Divorced	Unknown	Unknown	Positive	Unknown	T1	NX	No	No	Yes	No	No/Unknown	No/Unknown
＞3	≥40	Male	White	Unmarried	21~50	Unknown	Positive	Unknown	T1	N0	No	Yes	No	No	No/Unknown	No/Unknown
≤3	≥40	Male	White	Unmarried	Unknown	Unknown	Unknown	Unknown	TX	N0	Yes	No	Yes	No	No/Unknown	Yes
＞3	≥40	Male	White	Married	≤20	Unknown	Positive	Unknown	T1	N1	No	No	No	Local tumor destruction	No/Unknown	No/Unknown
＞3	≥40	Female	White	Married	51~100	Grade II	Positive	Unknown	T3	N0	No	No	No	No	No/Unknown	Yes
＞3	≥40	Male	White	Divorced	21~50	Grade I	Positive	Unknown	T2	N1	No	No	No	No	No/Unknown	Yes
＞3	≥40	Female	White	Married	Unknown	Unknown	Unknown	Unknown	T4	N0	No	No	Yes	No	No/Unknown	Yes
＞3	≥40	Male	Black	Unmarried	Unknown	Unknown	Positive	Unknown	TX	N1	Yes	No	Yes	No	Yes	Yes
≤3	≥40	Male	White	Unmarried	51~100	Unknown	Positive	Unknown	T3	NX	No	No	Yes	No	No/Unknown	No/Unknown
＞3	≥40	Male	Black	Married	＞100	Unknown	Positive	Unknown	T4	N0	No	No	No	Local tumor destruction	No/Unknown	Yes
≤3	≥40	Male	White	Divorced	Unknown	Grade IV	Unknown	Unknown	T1	N1	No	No	No	No	No/Unknown	No/Unknown
≤3	≥40	Male	Black	Unknown	21~50	Unknown	Positive	Unknown	T2	N0	Yes	No	No	No	No/Unknown	No/Unknown
＞3	≥40	Male	White	Married	21~50	Grade II	Positive	Ishak 5-6	T2	N0	No	No	Yes	No	No/Unknown	Yes
≤3	≥40	Male	White	Unmarried	51~100	Grade III	Positive	Unknown	T3	N1	No	No	No	No	No/Unknown	Yes
≤3	≥40	Male	Black	Married	≤20	Unknown	Positive	Unknown	T1	N0	No	No	No	No	No/Unknown	Yes
＞3	≥40	Female	White	Married	≤20	Unknown	Positive	Unknown	T3	N0	No	No	No	No	No/Unknown	No/Unknown
＞3	≥40	Female	Black	Unmarried	＞100	Grade III	Positive	Unknown	T3	N0	Yes	No	No	Lobectomy	No/Unknown	No/Unknown
＞3	≥40	Female	White	Widowed	Unknown	Grade II	Unknown	Unknown	T4	N0	No	No	No	No	No/Unknown	No/Unknown
≤3	≥40	Male	White	Widowed	Unknown	Unknown	Unknown	Unknown	TX	N1	No	No	No	No	No/Unknown	No/Unknown
≤3	≥40	Male	Black	Divorced	51~100	Unknown	Positive	Ishak 5-6	T3	N0	Yes	No	No	No	No/Unknown	No/Unknown
≤3	≥40	Male	White	Married	21~50	Grade II	Positive	Ishak 0-4	T2	N1	No	No	No	No	No/Unknown	No/Unknown
≤3	≥40	Male	White	Divorced	Unknown	Unknown	Positive	Unknown	T3	N1	Unknown	Unknown	Unknown	No	No/Unknown	No/Unknown
≤3	≥40	Male	White	Married	21~50	Unknown	Positive	Unknown	T1	N1	No	No	No	No	No/Unknown	No/Unknown
＞3	≥40	Male	White	Married	51~100	Unknown	Negative	Ishak 0-4	T1	N0	Yes	No	No	No	No/Unknown	Yes
≤3	≥40	Male	White	Divorced	Unknown	Unknown	Positive	Unknown	T3	N0	No	No	No	No	Yes	Yes
＞3	≥40	Female	White	Married	≤20	Grade III	Positive	Unknown	T1	N0	No	No	No	Wedge resection	No/Unknown	No/Unknown
＞3	≥40	Female	Black	Divorced	51~100	Grade II	Unknown	Ishak 5-6	T3	N0	Yes	No	No	Local tumor destruction	No/Unknown	Yes
≤3	≥40	Female	White	Married	21~50	Unknown	Positive	Unknown	T2	N0	No	No	Yes	No	No/Unknown	Yes
≤3	≥40	Male	Others	Married	＞100	Unknown	Positive	Unknown	T3	N0	Yes	No	Yes	No	No/Unknown	No/Unknown
＞3	≥40	Male	White	Married	51~100	Unknown	Positive	Unknown	T4	N1	No	No	Yes	Local tumor destruction	No/Unknown	Yes
≤3	≥40	Male	White	Unmarried	Unknown	Unknown	Positive	Unknown	T3	N0	No	No	Yes	No	No/Unknown	No/Unknown
≤3	≥40	Male	Others	Married	51~100	Unknown	Positive	Unknown	T3	N0	No	No	Yes	No	No/Unknown	Yes
≤3	≥40	Male	White	Unmarried	Unknown	Unknown	Positive	Unknown	TX	N0	No	No	Yes	No	No/Unknown	No/Unknown
≤3	≥40	Male	White	Unmarried	51~100	Unknown	Unknown	Unknown	T4	N0	No	No	Yes	No	No/Unknown	No/Unknown
＞3	≥40	Male	White	Married	51~100	Unknown	Positive	Unknown	T1	N0	No	No	No	No	No/Unknown	Yes
≤3	≥40	Male	Black	Divorced	Unknown	Unknown	Positive	Unknown	TX	N0	Yes	No	No	No	No/Unknown	No/Unknown
≤3	≥40	Female	Black	Divorced	Unknown	Grade II	Unknown	Unknown	TX	N0	No	No	No	No	No/Unknown	Yes
≤3	≥40	Male	White	Married	＞100	Unknown	Negative	Unknown	T3	N1	No	No	No	No	No/Unknown	No/Unknown
＞3	≥40	Male	Others	Married	51~100	Grade III	Positive	Unknown	TX	N1	Unknown	Unknown	Yes	No	No/Unknown	No/Unknown
≤3	≥40	Male	Others	Married	Unknown	Grade II	Positive	Unknown	TX	N1	Yes	No	No	No	No/Unknown	No/Unknown
≤3	≥40	Male	White	Unmarried	51~100	Grade III	Positive	Unknown	T4	N1	No	No	Yes	No	No/Unknown	No/Unknown
≤3	＜40	Female	White	Unmarried	51~100	Unknown	Unknown	Unknown	T3	N1	Yes	No	Yes	No	No/Unknown	Yes
≤3	≥40	Male	White	Divorced	21~50	Grade III	Positive	Unknown	T2	N1	Yes	No	No	No	Yes	Yes
＞3	≥40	Male	White	Separated	Unknown	Unknown	Unknown	Unknown	TX	NX	Unknown	Unknown	Yes	No	No/Unknown	No/Unknown
≤3	≥40	Female	White	Married	≤20	Grade IV	Unknown	Unknown	T3	N0	No	No	No	No	No/Unknown	Yes
＞3	≥40	Male	White	Married	51~100	Grade III	Positive	Unknown	T1	N0	Yes	Yes	No	No	Yes	Yes
≤3	≥40	Male	Others	Widowed	＞100	Unknown	Positive	Unknown	T3	NX	No	No	Yes	No	No/Unknown	Yes
≤3	≥40	Male	White	Married	Unknown	Grade II	Positive	Unknown	TX	N1	No	No	Yes	No	No/Unknown	Yes
≤3	≥40	Female	White	Widowed	Unknown	Unknown	Positive	Unknown	TX	NX	No	No	Yes	No	No/Unknown	No/Unknown
≤3	≥40	Male	White	Divorced	21~50	Unknown	Unknown	Unknown	T4	N0	Yes	No	Yes	No	Yes	No/Unknown
＞3	≥40	Male	Others	Divorced	Unknown	Grade I	Unknown	Unknown	TX	N0	No	No	No	No	No/Unknown	Yes
≤3	≥40	Male	White	Married	Unknown	Grade II	Unknown	Unknown	TX	N0	No	No	Yes	No	No/Unknown	No/Unknown
≤3	≥40	Male	White	Married	＞100	Unknown	Positive	Unknown	T4	N1	No	No	No	No	No/Unknown	Yes
≤3	≥40	Male	White	Married	21~50	Unknown	Unknown	Unknown	T2	N0	No	No	No	No	No/Unknown	Yes
＞3	≥40	Male	White	Married	＞100	Unknown	Positive	Unknown	T3	N0	Yes	No	No	No	Yes	Yes
≤3	≥40	Male	Black	Married	51~100	Unknown	Negative	Unknown	T3	N0	No	No	Yes	No	No/Unknown	No/Unknown
＞3	≥40	Female	White	Unmarried	51~100	Grade II	Positive	Unknown	T3	N0	Yes	No	No	No	Yes	Yes
＞3	≥40	Male	Black	Unmarried	＞100	Grade II	Positive	Unknown	T3	N0	No	No	No	No	No/Unknown	Yes
＞3	≥40	Male	Black	Widowed	51~100	Unknown	Positive	Unknown	T3	N0	No	No	No	No	No/Unknown	Yes
≤3	≥40	Male	White	Married	51~100	Unknown	Positive	Ishak 0-4	T3	N0	No	No	Yes	No	No/Unknown	Yes
≤3	≥40	Male	Black	Unmarried	＞100	Unknown	Positive	Unknown	TX	NX	No	No	No	No	No/Unknown	No/Unknown
≤3	≥40	Male	Black	Married	Unknown	Unknown	Positive	Unknown	TX	N0	Yes	No	No	No	No/Unknown	No/Unknown
＞3	≥40	Male	White	Unmarried	Unknown	Unknown	Positive	Unknown	TX	N0	No	No	No	No	No/Unknown	Yes
≤3	≥40	Male	White	Widowed	21~50	Grade I	Positive	Unknown	T2	N0	Yes	No	No	No	No/Unknown	No/Unknown
＞3	≥40	Male	White	Married	＞100	Unknown	Positive	Unknown	T2	NX	Yes	No	Yes	No	No/Unknown	No/Unknown
＞3	≥40	Male	White	Unmarried	51~100	Unknown	Positive	Unknown	T3	N0	Yes	No	No	No	Yes	Yes
≤3	≥40	Male	White	Married	51~100	Unknown	Positive	Ishak 5-6	T3	N0	No	No	No	No	No/Unknown	No/Unknown
≤3	≥40	Male	White	Married	＞100	Unknown	Negative	Unknown	T3	N1	No	No	No	No	Yes	No/Unknown
≤3	≥40	Male	White	Widowed	Unknown	Unknown	Positive	Unknown	T3	N1	No	No	Yes	No	No/Unknown	No/Unknown
≤3	≥40	Male	White	Married	＞100	Unknown	Unknown	Unknown	T1	N0	No	No	Yes	No	No/Unknown	Yes
≤3	≥40	Male	Black	Unmarried	＞100	Unknown	Positive	Unknown	T3	N1	Yes	No	No	No	Yes	No/Unknown
≤3	≥40	Male	White	Married	＞100	Unknown	Positive	Unknown	T3	N0	No	No	Yes	No	No/Unknown	No/Unknown
≤3	≥40	Male	White	Married	21~50	Unknown	Positive	Unknown	T2	N0	No	No	Yes	No	No/Unknown	No/Unknown
≤3	≥40	Male	White	Unmarried	≤20	Unknown	Positive	Unknown	T2	N0	No	No	No	No	No/Unknown	Yes
≤3	≥40	Male	White	Unmarried	＞100	Unknown	Positive	Unknown	T3	N0	No	No	Yes	No	No/Unknown	No/Unknown
＞3	≥40	Female	Black	Divorced	51~100	Unknown	Positive	Unknown	T3	N1	No	No	No	No	No/Unknown	Yes
＞3	≥40	Male	Black	Unmarried	51~100	Grade II	Unknown	Unknown	T4	N1	Unknown	Unknown	Unknown	No	No/Unknown	No/Unknown
≤3	≥40	Male	White	Unmarried	Unknown	Unknown	Unknown	Unknown	TX	NX	Yes	No	No	No	No/Unknown	No/Unknown
＞3	≥40	Male	White	Married	51~100	Unknown	Positive	Ishak 5-6	T4	N0	Yes	No	Yes	No	No/Unknown	Yes
＞3	≥40	Male	White	Married	＞100	Grade I	Positive	Unknown	T3	N1	No	No	No	No	No/Unknown	Yes
＞3	≥40	Male	White	Married	21~50	Unknown	Unknown	Ishak 5-6	T1	N0	No	No	No	No	No/Unknown	Yes
＞3	≥40	Male	Black	Unmarried	≤20	Unknown	Unknown	Unknown	T1	N0	Yes	No	Yes	No	Yes	Yes
＞3	≥40	Male	White	Married	21~50	Unknown	Negative	Ishak 5-6	T2	N1	No	No	No	No	No/Unknown	Yes
≤3	≥40	Male	White	Unknown	＞100	Grade II	Negative	Unknown	T3	N1	No	No	Yes	No	No/Unknown	Yes
≤3	≥40	Female	White	Unmarried	51~100	Grade II	Positive	Ishak 5-6	TX	N0	No	No	No	No	No/Unknown	No/Unknown
＞3	≥40	Male	Others	Married	51~100	Grade I	Positive	Ishak 0-4	T1	N0	No	No	Yes	No	Yes	Yes
≤3	≥40	Male	White	Married	Unknown	Grade III	Positive	Unknown	T1	N1	Yes	No	No	No	No/Unknown	No/Unknown
＞3	≥40	Female	Black	Divorced	21~50	Unknown	Negative	Ishak 5-6	T2	N0	Yes	No	No	No	Yes	Yes
≤3	≥40	Female	Black	Unknown	Unknown	Unknown	Unknown	Unknown	TX	N0	No	No	Yes	No	No/Unknown	No/Unknown
≤3	≥40	Female	White	Unmarried	Unknown	Unknown	Positive	Unknown	T3	N0	No	No	Yes	No	No/Unknown	No/Unknown
≤3	≥40	Male	White	Widowed	＞100	Grade II	Positive	Unknown	T3	N0	No	No	No	No	No/Unknown	No/Unknown
＞3	≥40	Male	White	Married	21~50	Grade II	Negative	Ishak 5-6	T1	N0	No	No	Yes	No	No/Unknown	Yes
≤3	≥40	Male	White	Married	51~100	Grade I	Positive	Unknown	T3	N0	Yes	No	No	No	No/Unknown	No/Unknown
≤3	≥40	Male	White	Married	＞100	Unknown	Positive	Unknown	T3	N1	No	No	No	No	Yes	Yes
＞3	≥40	Male	White	Married	Unknown	Unknown	Unknown	Unknown	TX	NX	Yes	No	No	No	Yes	No/Unknown
≤3	≥40	Female	White	Divorced	Unknown	Unknown	Positive	Unknown	T1	N0	No	No	No	No	No/Unknown	No/Unknown
＞3	≥40	Female	Black	Married	51~100	Unknown	Negative	Ishak 5-6	T1	N0	No	No	Yes	No	No/Unknown	No/Unknown
≤3	≥40	Male	White	Married	51~100	Unknown	Positive	Unknown	T3	N0	Unknown	No	Yes	No	No/Unknown	Yes
≤3	≥40	Male	White	Unmarried	＞100	Unknown	Positive	Ishak 5-6	T1	N1	No	No	No	No	No/Unknown	No/Unknown
＞3	≥40	Male	White	Married	51~100	Grade III	Positive	Unknown	T1	N0	Yes	No	No	No	Yes	Yes
＞3	≥40	Male	Black	Divorced	21~50	Grade II	Positive	Unknown	T1	N0	Unknown	Unknown	Unknown	No	No/Unknown	No/Unknown
≤3	≥40	Male	White	Married	Unknown	Grade III	Positive	Unknown	TX	N1	No	No	Yes	No	Yes	No/Unknown
≤3	≥40	Male	White	Married	51~100	Grade II	Positive	Unknown	T3	N0	No	No	Yes	No	No/Unknown	Yes
≤3	≥40	Male	White	Divorced	21~50	Grade II	Negative	Unknown	T3	N1	No	No	No	No	No/Unknown	No/Unknown
≤3	≥40	Male	White	Married	＞100	Unknown	Positive	Unknown	T3	N0	No	No	No	No	No/Unknown	Yes
≤3	≥40	Male	Black	Married	21~50	Unknown	Unknown	Unknown	T2	N0	No	No	Yes	No	No/Unknown	No/Unknown
≤3	≥40	Male	Black	Married	Unknown	Unknown	Positive	Unknown	T3	N0	No	No	Yes	No	No/Unknown	No/Unknown
≤3	≥40	Male	White	Married	＞100	Unknown	Positive	Unknown	T1	N1	No	No	No	No	No/Unknown	No/Unknown
≤3	≥40	Male	White	Unmarried	51~100	Unknown	Negative	Unknown	T3	N0	No	No	Yes	No	No/Unknown	No/Unknown
＞3	≥40	Male	White	Married	51~100	Grade II	Positive	Unknown	T3	N0	No	Yes	No	No	Yes	Yes
≤3	≥40	Male	White	Married	Unknown	Unknown	Positive	Ishak 5-6	T1	NX	Yes	Yes	No	No	No/Unknown	No/Unknown
≤3	≥40	Male	White	Widowed	51~100	Unknown	Positive	Unknown	T1	N0	No	No	No	No	No/Unknown	Yes
＞3	≥40	Male	White	Married	Unknown	Unknown	Unknown	Ishak 5-6	T3	N0	No	No	No	No	No/Unknown	Yes
≤3	≥40	Male	Black	Married	＞100	Grade II	Positive	Unknown	T3	NX	No	No	Yes	No	No/Unknown	No/Unknown
≤3	≥40	Male	White	Divorced	51~100	Unknown	Unknown	Ishak 5-6	T3	N0	No	Yes	No	No	No/Unknown	No/Unknown
≤3	≥40	Female	Black	Divorced	21~50	Unknown	Positive	Unknown	T2	N0	No	No	No	No	No/Unknown	No/Unknown
≤3	≥40	Male	White	Unmarried	21~50	Grade II	Negative	Unknown	T2	N1	Yes	Yes	No	No	No/Unknown	No/Unknown
≤3	≥40	Male	White	Widowed	Unknown	Unknown	Unknown	Unknown	T1	N0	No	No	No	No	No/Unknown	No/Unknown
＞3	≥40	Male	White	Unmarried	51~100	Unknown	Positive	Unknown	T1	N0	No	No	Yes	No	No/Unknown	Yes
＞3	≥40	Male	Black	Divorced	Unknown	Grade II	Positive	Unknown	TX	NX	No	No	Yes	No	No/Unknown	No/Unknown
＞3	≥40	Male	Black	Widowed	21~50	Grade II	Positive	Unknown	T2	N1	No	No	No	No	No/Unknown	Yes
≤3	≥40	Male	Black	Unmarried	51~100	Unknown	Positive	Unknown	T3	NX	Yes	No	Yes	No	No/Unknown	No/Unknown
≤3	≥40	Male	Black	Unmarried	Unknown	Grade III	Positive	Unknown	TX	N0	Yes	No	No	No	No/Unknown	No/Unknown
≤3	≥40	Male	Black	Unmarried	＞100	Grade I	Unknown	Unknown	T1	N0	No	No	Yes	No	No/Unknown	Yes
≤3	≥40	Male	White	Married	21~50	Unknown	Negative	Ishak 5-6	T1	N1	No	No	No	No	No/Unknown	No/Unknown
≤3	≥40	Female	Black	Widowed	21~50	Grade III	Positive	Ishak 5-6	T2	N0	No	No	Yes	No	No/Unknown	No/Unknown
＞3	≥40	Male	Black	Unmarried	51~100	Unknown	Positive	Unknown	T3	NX	Yes	No	Yes	No	No/Unknown	No/Unknown
≤3	≥40	Male	Black	Unmarried	Unknown	Unknown	Positive	Unknown	TX	NX	No	No	Yes	No	No/Unknown	Yes
≤3	≥40	Female	Black	Divorced	＞100	Unknown	Positive	Ishak 5-6	T3	NX	Yes	No	No	No	Yes	No/Unknown
≤3	≥40	Male	Black	Separated	Unknown	Grade III	Positive	Unknown	T3	N0	No	No	No	No	No/Unknown	No/Unknown
≤3	≥40	Male	Black	Unmarried	51~100	Unknown	Positive	Unknown	T3	N0	No	No	No	No	No/Unknown	No/Unknown
≤3	≥40	Male	White	Married	＞100	Grade IV	Positive	Unknown	T3	NX	Yes	No	No	No	No/Unknown	No/Unknown
≤3	≥40	Male	White	Unmarried	Unknown	Unknown	Unknown	Unknown	TX	NX	Unknown	Unknown	Unknown	No	No/Unknown	No/Unknown
≤3	≥40	Female	Black	Unmarried	≤20	Grade II	Unknown	Unknown	T2	N0	Yes	No	No	No	No/Unknown	No/Unknown
＞3	≥40	Male	Black	Unmarried	Unknown	Grade II	Positive	Unknown	T4	N0	No	No	Yes	No	No/Unknown	Yes
＞3	≥40	Male	White	Married	21~50	Unknown	Negative	Ishak 0-4	T2	N0	No	No	No	No	No/Unknown	No/Unknown
≤3	≥40	Female	Black	Widowed	Unknown	Grade III	Positive	Ishak 5-6	TX	N1	No	No	No	No	No/Unknown	No/Unknown
≤3	≥40	Male	White	Unmarried	＞100	Grade II	Positive	Unknown	T3	N0	Yes	No	No	No	No/Unknown	No/Unknown
≤3	≥40	Female	Black	Unmarried	51~100	Unknown	Positive	Unknown	T3	N0	No	No	Yes	No	No/Unknown	No/Unknown
≤3	≥40	Male	White	Married	Unknown	Grade III	Positive	Ishak 5-6	TX	N0	Yes	No	No	No	No/Unknown	Yes
＞3	＜40	Male	Others	Unmarried	51~100	Unknown	Positive	Unknown	T3	N0	Yes	No	No	No	No/Unknown	Yes
≤3	≥40	Female	Black	Married	Unknown	Unknown	Unknown	Unknown	TX	NX	Yes	Yes	Yes	No	No/Unknown	No/Unknown
＞3	≥40	Male	White	Married	＞100	Unknown	Positive	Ishak 5-6	T3	N0	Yes	No	Yes	No	No/Unknown	Yes
≤3	≥40	Male	Black	Divorced	≤20	Unknown	Positive	Ishak 5-6	T2	N1	No	No	No	No	No/Unknown	No/Unknown
≤3	≥40	Male	Others	Divorced	＞100	Unknown	Positive	Ishak 5-6	T3	N1	No	No	Yes	No	No/Unknown	Yes
≤3	≥40	Male	White	Married	Unknown	Grade II	Positive	Unknown	TX	N0	No	No	Yes	No	No/Unknown	No/Unknown
＞3	≥40	Male	White	Married	21~50	Unknown	Negative	Ishak 5-6	T3	N0	No	No	No	No	No/Unknown	Yes
≤3	≥40	Female	Black	Divorced	51~100	Unknown	Positive	Ishak 5-6	T3	N0	No	No	No	No	No/Unknown	No/Unknown
≤3	≥40	Female	White	Married	Unknown	Unknown	Positive	Unknown	TX	N0	No	No	Yes	No	No/Unknown	No/Unknown
≤3	≥40	Male	White	Divorced	21~50	Unknown	Positive	Unknown	T2	N0	No	No	Yes	No	No/Unknown	No/Unknown
≤3	≥40	Male	White	Married	Unknown	Unknown	Unknown	Unknown	TX	N0	Unknown	Unknown	Unknown	No	No/Unknown	No/Unknown
≤3	≥40	Male	White	Unmarried	51~100	Unknown	Positive	Ishak 5-6	T3	N0	No	No	Yes	No	No/Unknown	Yes
≤3	≥40	Male	White	Married	51~100	Unknown	Positive	Unknown	T3	N0	No	No	No	No	No/Unknown	No/Unknown
＞3	≥40	Male	Black	Divorced	51~100	Grade II	Positive	Ishak 5-6	T3	N0	Yes	No	No	No	No/Unknown	Yes
≤3	≥40	Male	Black	Married	21~50	Unknown	Positive	Unknown	T2	N0	Yes	No	No	No	No/Unknown	No/Unknown
≤3	≥40	Male	White	Married	Unknown	Unknown	Positive	Unknown	TX	N0	Unknown	Unknown	Unknown	No	No/Unknown	No/Unknown
≤3	≥40	Male	White	Unmarried	21~50	Unknown	Unknown	Unknown	T2	N0	No	No	Yes	No	No/Unknown	No/Unknown
＞3	≥40	Female	White	Married	Unknown	Unknown	Unknown	Unknown	TX	NX	Yes	No	No	No	Yes	No/Unknown
≤3	≥40	Male	White	Divorced	Unknown	Unknown	Unknown	Ishak 5-6	TX	NX	Unknown	Unknown	Unknown	No	No/Unknown	No/Unknown
＞3	≥40	Male	White	Married	Unknown	Unknown	Unknown	Ishak 5-6	TX	NX	Unknown	Unknown	Unknown	No	No/Unknown	No/Unknown
≤3	≥40	Female	White	Married	Unknown	Unknown	Unknown	Ishak 5-6	TX	NX	Yes	No	No	No	No/Unknown	No/Unknown
＞3	≥40	Male	Black	Married	＞100	Grade II	Negative	Unknown	T1	N0	Yes	No	No	No	Yes	No/Unknown
＞3	≥40	Male	White	Married	51~100	Grade I	Unknown	Unknown	T4	N0	No	Yes	Yes	No	No/Unknown	No/Unknown
≤3	≥40	Male	Black	Married	＞100	Grade II	Positive	Unknown	T3	N0	No	No	No	No	No/Unknown	No/Unknown
≤3	≥40	Male	White	Married	＞100	Unknown	Positive	Ishak 5-6	T3	NX	No	No	Yes	No	No/Unknown	Yes
＞3	≥40	Male	Black	Widowed	21~50	Unknown	Positive	Ishak 5-6	T1	N0	Yes	No	No	No	Yes	No/Unknown
≤3	≥40	Male	Black	Married	21~50	Unknown	Positive	Ishak 5-6	T3	NX	Yes	No	No	No	Yes	No/Unknown
＞3	≥40	Male	White	Married	51~100	Unknown	Positive	Ishak 5-6	T1	N0	Yes	Yes	Yes	Local tumor destruction	Yes	No/Unknown
≤3	≥40	Male	Black	Married	Unknown	Unknown	Positive	Ishak 5-6	T3	N1	No	No	Yes	No	No/Unknown	Yes
＞3	≥40	Male	Black	Unmarried	21~50	Grade II	Positive	Ishak 5-6	T3	N0	No	No	Yes	Local tumor destruction	No/Unknown	Yes
＞3	≥40	Male	Black	Unmarried	51~100	Unknown	Negative	Unknown	T1	N0	No	No	No	Local tumor destruction	Yes	No/Unknown
≤3	≥40	Male	White	Married	51~100	Grade II	Positive	Ishak 5-6	T4	N0	No	No	Yes	No	No/Unknown	Yes
＞3	≥40	Female	White	Divorced	51~100	Grade II	Positive	Unknown	T4	N1	No	No	No	No	No/Unknown	Yes
＞3	＜40	Female	White	Unmarried	＞100	Grade II	Positive	Ishak 0-4	T3	N0	No	No	No	Lobectomy	Yes	Yes
≤3	≥40	Male	White	Divorced	21~50	Unknown	Unknown	Unknown	T4	N1	No	No	No	No	No/Unknown	Yes
≤3	≥40	Male	Black	Married	＞100	Grade I	Positive	Unknown	T3	N0	No	No	No	No	No/Unknown	Yes
≤3	≥40	Male	White	Married	＞100	Unknown	Negative	Ishak 0-4	T3	N1	No	No	No	No	No/Unknown	No/Unknown
≤3	≥40	Male	Black	Unmarried	51~100	Grade II	Positive	Unknown	T3	N0	No	No	Yes	No	Yes	Yes
≤3	≥40	Male	White	Divorced	Unknown	Grade III	Positive	Ishak 0-4	TX	N0	Yes	No	No	No	Yes	No/Unknown
≤3	≥40	Male	White	Widowed	Unknown	Grade II	Positive	Unknown	T1	N0	No	No	Yes	No	No/Unknown	No/Unknown
≤3	≥40	Male	Black	Unmarried	51~100	Unknown	Positive	Ishak 5-6	T1	N0	No	No	Yes	No	No/Unknown	No/Unknown
≤3	≥40	Male	White	Married	51~100	Unknown	Positive	Unknown	T3	N0	No	No	Yes	No	No/Unknown	No/Unknown
≤3	≥40	Male	Black	Married	21~50	Grade III	Positive	Unknown	T2	N0	No	No	No	No	No/Unknown	No/Unknown
≤3	≥40	Male	White	Unmarried	51~100	Unknown	Unknown	Unknown	T3	N0	No	No	Yes	No	No/Unknown	No/Unknown
≤3	≥40	Male	White	Unmarried	Unknown	Unknown	Negative	Unknown	TX	NX	No	No	No	No	No/Unknown	No/Unknown
≤3	≥40	Male	White	Unmarried	＞100	Unknown	Positive	Unknown	T3	NX	No	No	Yes	No	No/Unknown	No/Unknown
＞3	≥40	Male	Black	Married	Unknown	Unknown	Negative	Unknown	TX	N0	Yes	No	Unknown	No	Yes	No/Unknown
＞3	≥40	Male	White	Married	21~50	Unknown	Positive	Ishak 5-6	T2	N0	No	No	Yes	Lobectomy	No/Unknown	No/Unknown
＞3	≥40	Male	White	Unmarried	51~100	Grade II	Positive	Unknown	T4	N1	Yes	No	No	No	No/Unknown	Yes
＞3	≥40	Male	Black	Widowed	21~50	Unknown	Positive	Ishak 5-6	T2	N0	No	No	Yes	No	No/Unknown	No/Unknown
＞3	≥40	Male	Black	Unmarried	＞100	Grade I	Positive	Unknown	T3	N0	No	No	Yes	No	No/Unknown	Yes
≤3	≥40	Female	Black	Married	21~50	Grade I	Positive	Unknown	T2	N0	Yes	No	Yes	No	No/Unknown	Yes
＞3	≥40	Male	Black	Married	51~100	Unknown	Positive	Ishak 0-4	T3	N1	No	No	Yes	No	No/Unknown	Yes
＞3	≥40	Male	Black	Unmarried	＞100	Grade II	Unknown	Ishak 5-6	T3	N0	No	No	Yes	No	No/Unknown	No/Unknown
≤3	≥40	Male	Black	Widowed	＞100	Unknown	Positive	Unknown	T3	N1	Yes	No	No	No	No/Unknown	Yes
≤3	≥40	Male	White	Married	51~100	Unknown	Positive	Unknown	T3	NX	Yes	No	Yes	No	No/Unknown	No/Unknown
≤3	≥40	Male	Black	Married	Unknown	Unknown	Unknown	Unknown	T1	NX	No	No	Yes	No	No/Unknown	No/Unknown
≤3	≥40	Male	White	Unmarried	51~100	Grade II	Unknown	Unknown	T3	N0	No	No	No	No	No/Unknown	No/Unknown
＞3	≥40	Male	White	Married	＞100	Grade I	Negative	Unknown	T3	N0	No	No	No	No	No/Unknown	Yes
≤3	≥40	Female	Black	Unknown	51~100	Unknown	Positive	Unknown	T3	N1	Yes	No	No	No	No/Unknown	No/Unknown
＞3	≥40	Female	White	Married	21~50	Unknown	Positive	Ishak 5-6	T1	N0	No	No	Yes	No	No/Unknown	Yes
≤3	≥40	Male	White	Unknown	51~100	Unknown	Unknown	Unknown	T3	N0	Yes	No	No	No	No/Unknown	Yes
≤3	≥40	Male	White	Unmarried	＞100	Grade I	Positive	Unknown	T4	N0	Yes	No	No	No	No/Unknown	No/Unknown
≤3	≥40	Male	White	Unmarried	＞100	Unknown	Positive	Ishak 5-6	T3	N1	No	No	Yes	No	No/Unknown	No/Unknown
≤3	≥40	Male	White	Married	Unknown	Unknown	Positive	Ishak 5-6	T3	N0	No	No	No	No	No/Unknown	No/Unknown
＞3	≥40	Male	White	Married	21~50	Unknown	Positive	Ishak 5-6	T2	N0	No	No	No	No	No/Unknown	Yes
＞3	≥40	Female	White	Married	51~100	Grade III	Positive	Unknown	T3	N0	No	No	Yes	No	No/Unknown	Yes
＞3	≥40	Male	White	Unmarried	Unknown	Unknown	Positive	Unknown	T4	N0	Yes	No	No	No	No/Unknown	No/Unknown
≤3	≥40	Male	Black	Divorced	21~50	Unknown	Positive	Ishak 5-6	T4	N0	No	No	No	No	No/Unknown	No/Unknown
≤3	≥40	Male	Black	Unmarried	Unknown	Unknown	Unknown	Unknown	TX	N0	Yes	No	Yes	No	No/Unknown	No/Unknown
≤3	≥40	Female	Others	Married	＞100	Grade I	Positive	Ishak 0-4	T1	N0	No	No	Yes	No	No/Unknown	No/Unknown
＞3	≥40	Male	Black	Unmarried	21~50	Unknown	Negative	Unknown	T2	N0	No	No	No	No	No/Unknown	Yes
≤3	≥40	Male	Black	Unmarried	Unknown	Grade III	Positive	Unknown	TX	N0	Yes	No	Yes	No	Yes	No/Unknown
≤3	≥40	Male	White	Widowed	＞100	Unknown	Positive	Ishak 0-4	T3	N1	No	No	No	No	No/Unknown	No/Unknown
＞3	≥40	Male	White	Married	21~50	Grade II	Positive	Unknown	T2	N0	Yes	No	No	No	No/Unknown	Yes
≤3	≥40	Female	Black	Unmarried	Unknown	Unknown	Positive	Unknown	TX	NX	Unknown	Unknown	Unknown	No	No/Unknown	No/Unknown
≤3	≥40	Male	White	Unknown	≤20	Unknown	Unknown	Unknown	T2	NX	No	No	No	No	No/Unknown	No/Unknown
≤3	≥40	Male	Black	Unmarried	＞100	Grade I	Positive	Ishak 5-6	T1	N0	Yes	No	No	No	No/Unknown	No/Unknown
≤3	≥40	Male	Black	Married	51~100	Unknown	Positive	Ishak 5-6	T3	N1	No	No	No	No	No/Unknown	No/Unknown
≤3	≥40	Male	Black	Divorced	Unknown	Grade II	Unknown	Ishak 5-6	T4	NX	No	No	No	No	No/Unknown	No/Unknown
≤3	≥40	Male	Black	Divorced	51~100	Unknown	Unknown	Unknown	T1	N0	No	No	No	No	No/Unknown	No/Unknown
≤3	≥40	Male	White	Married	＞100	Grade III	Positive	Unknown	T2	N0	No	No	No	Wedge resection	No/Unknown	No/Unknown
≤3	≥40	Male	Black	Unmarried	21~50	Unknown	Positive	Ishak 5-6	T1	N0	Yes	No	No	No	No/Unknown	No/Unknown
≤3	≥40	Male	Black	Married	Unknown	Unknown	Positive	Ishak 5-6	TX	N1	No	No	No	No	No/Unknown	No/Unknown
≤3	≥40	Male	Black	Married	＞100	Grade II	Positive	Unknown	T3	N0	No	No	Yes	No	Yes	Yes
≤3	≥40	Male	White	Divorced	＞100	Unknown	Positive	Ishak 5-6	T3	N1	Yes	No	No	No	Yes	No/Unknown
＞3	≥40	Male	Black	Divorced	51~100	Grade I	Positive	Unknown	T3	N1	No	No	No	No	No/Unknown	No/Unknown
≤3	≥40	Male	Black	Unmarried	51~100	Unknown	Positive	Ishak 5-6	T3	N0	Yes	No	No	No	Yes	No/Unknown
≤3	≥40	Male	Black	Divorced	51~100	Unknown	Positive	Unknown	T1	N0	Yes	No	No	No	Yes	No/Unknown
＞3	≥40	Male	Black	Married	＞100	Grade II	Positive	Unknown	T3	N1	Yes	No	Yes	No	Yes	Yes
＞3	≥40	Male	Black	Divorced	21~50	Grade III	Unknown	Unknown	T1	N0	Yes	No	No	No	Yes	Yes
≤3	≥40	Male	White	Widowed	21~50	Grade III	Positive	Unknown	T1	N1	No	No	No	No	No/Unknown	No/Unknown
＞3	≥40	Male	Black	Unmarried	51~100	Grade II	Positive	Unknown	T3	N1	Yes	No	No	No	No/Unknown	Yes
＞3	≥40	Male	White	Married	21~50	Unknown	Positive	Ishak 5-6	T1	N0	Yes	Unknown	Unknown	No	No/Unknown	Yes
＞3	≥40	Male	White	Married	51~100	Unknown	Unknown	Unknown	T3	N0	No	No	Yes	No	No/Unknown	Yes
≤3	≥40	Male	Others	Married	21~50	Grade III	Positive	Unknown	T3	N0	Yes	No	No	No	No/Unknown	Yes
≤3	≥40	Male	Black	Married	Unknown	Unknown	Positive	Unknown	TX	N1	No	No	Yes	No	No/Unknown	Yes
＞3	＜40	Female	White	Married	21~50	Unknown	Unknown	Unknown	T1	N0	Unknown	No	No	No	Yes	Yes
＞3	≥40	Male	Black	Divorced	51~100	Unknown	Positive	Ishak 5-6	T1	N0	Yes	No	No	No	Yes	No/Unknown
≤3	≥40	Female	Black	Divorced	51~100	Unknown	Positive	Ishak 5-6	T3	N1	No	No	No	No	Yes	Yes
≤3	≥40	Male	White	Married	51~100	Grade I	Positive	Ishak 5-6	T3	N1	No	No	No	No	No/Unknown	Yes
＞3	≥40	Male	Black	Married	Unknown	Unknown	Positive	Ishak 5-6	TX	N0	Yes	No	No	No	Yes	No/Unknown
≤3	≥40	Male	White	Married	21~50	Unknown	Positive	Ishak 5-6	TX	NX	Unknown	Unknown	Unknown	No	No/Unknown	No/Unknown
≤3	≥40	Male	White	Divorced	Unknown	Grade IV	Positive	Unknown	TX	N0	No	No	No	No	No/Unknown	No/Unknown
＞3	≥40	Male	White	Married	51~100	Unknown	Positive	Unknown	T1	N0	Yes	No	No	No	Yes	Yes
＞3	≥40	Female	White	Widowed	21~50	Grade II	Positive	Unknown	T3	N0	No	No	Yes	No	No/Unknown	Yes
＞3	≥40	Male	White	Unknown	51~100	Grade II	Positive	Ishak 0-4	T2	N0	No	No	No	Lobectomy	No/Unknown	No/Unknown
≤3	≥40	Male	White	Married	Unknown	Unknown	Positive	Unknown	TX	N0	No	No	Yes	No	No/Unknown	No/Unknown
≤3	≥40	Male	Black	Married	Unknown	Unknown	Positive	Unknown	T3	N0	No	No	No	No	No/Unknown	No/Unknown
≤3	≥40	Female	Black	Unknown	＞100	Unknown	Negative	Unknown	T3	N0	No	No	Yes	No	Yes	No/Unknown
＞3	≥40	Male	White	Unmarried	Unknown	Unknown	Positive	Ishak 5-6	T1	N1	Yes	No	Yes	No	Yes	No/Unknown
＞3	≥40	Male	Black	Separated	51~100	Grade I	Positive	Ishak 5-6	T3	N0	Yes	No	No	No	Yes	Yes
≤3	≥40	Female	White	Widowed	21~50	Unknown	Positive	Unknown	T2	N0	No	No	No	No	No/Unknown	No/Unknown
≤3	≥40	Female	Black	Unmarried	51~100	Unknown	Positive	Ishak 5-6	T3	N1	No	No	Yes	No	Yes	No/Unknown
≤3	≥40	Male	White	Unmarried	＞100	Unknown	Unknown	Unknown	T4	N0	No	No	No	No	No/Unknown	No/Unknown
≤3	≥40	Male	White	Unmarried	21~50	Unknown	Positive	Unknown	T1	N0	No	No	Yes	No	No/Unknown	No/Unknown
≤3	≥40	Male	Black	Married	Unknown	Grade III	Positive	Ishak 5-6	T3	NX	No	No	No	No	No/Unknown	Yes
＞3	≥40	Male	Black	Married	21~50	Grade III	Positive	Unknown	T2	N1	No	No	No	No	Yes	Yes
≤3	≥40	Female	Black	Unmarried	Unknown	Unknown	Positive	Unknown	T1	N0	No	No	Yes	No	No/Unknown	No/Unknown
≤3	≥40	Male	Black	Widowed	51~100	Unknown	Positive	Unknown	T1	N0	Yes	No	Yes	No	No/Unknown	No/Unknown
≤3	≥40	Female	White	Divorced	51~100	Unknown	Positive	Unknown	T3	N0	Yes	No	No	No	Yes	No/Unknown
＞3	≥40	Male	Black	Unmarried	51~100	Unknown	Positive	Unknown	T3	N0	Yes	No	No	No	No/Unknown	No/Unknown
≤3	≥40	Male	White	Unmarried	Unknown	Unknown	Unknown	Unknown	TX	NX	Unknown	Unknown	Unknown	No	No/Unknown	No/Unknown
≤3	≥40	Male	Black	Unmarried	＞100	Grade II	Unknown	Unknown	T1	N0	No	No	Yes	No	No/Unknown	No/Unknown
＞3	≥40	Male	White	Married	＞100	Grade I	Negative	Ishak 0-4	T1	N0	No	No	No	Lobectomy	No/Unknown	Yes
≤3	≥40	Male	Black	Unmarried	51~100	Unknown	Positive	Unknown	T1	N0	Yes	No	No	No	No/Unknown	No/Unknown
＞3	≥40	Male	White	Married	Unknown	Unknown	Positive	Ishak 0-4	TX	N1	No	No	No	No	No/Unknown	Yes
≤3	≥40	Male	White	Married	Unknown	Unknown	Positive	Ishak 5-6	TX	NX	No	No	Yes	No	No/Unknown	No/Unknown
≤3	≥40	Male	Black	Separated	21~50	Unknown	Positive	Ishak 5-6	T4	N0	No	No	Yes	No	No/Unknown	No/Unknown
≤3	≥40	Male	Black	Unknown	21~50	Unknown	Positive	Unknown	T2	N0	Yes	No	No	No	No/Unknown	No/Unknown
≤3	≥40	Male	Black	Divorced	Unknown	Unknown	Positive	Unknown	TX	N0	No	No	Yes	No	No/Unknown	No/Unknown
≤3	≥40	Male	Black	Divorced	Unknown	Unknown	Unknown	Unknown	T1	N0	Yes	Unknown	Unknown	No	No/Unknown	No/Unknown
＞3	≥40	Male	Black	Unmarried	21~50	Grade I	Positive	Unknown	T2	N0	Yes	No	No	No	No/Unknown	Yes
≤3	≥40	Male	Black	Married	Unknown	Grade II	Positive	Ishak 0-4	TX	N0	No	No	Yes	No	No/Unknown	No/Unknown
＞3	≥40	Male	White	Married	21~50	Unknown	Positive	Ishak 5-6	T2	N0	No	No	No	No	No/Unknown	Yes
＞3	≥40	Male	White	Married	21~50	Grade II	Negative	Unknown	T2	N0	Yes	No	No	No	Yes	No/Unknown
＞3	≥40	Male	White	Divorced	21~50	Unknown	Positive	Ishak 5-6	T2	N0	No	No	No	No	No/Unknown	Yes
≤3	≥40	Male	Black	Separated	51~100	Unknown	Positive	Unknown	T4	N1	No	No	Unknown	No	No/Unknown	Yes
＞3	≥40	Male	White	Divorced	51~100	Grade II	Positive	Ishak 5-6	T3	N0	No	No	No	No	No/Unknown	Yes
≤3	≥40	Female	White	Married	21~50	Unknown	Negative	Unknown	T2	N0	Yes	No	No	No	Yes	No/Unknown
≤3	≥40	Male	White	Married	＞100	Unknown	Positive	Unknown	T4	N0	No	No	Yes	No	No/Unknown	Yes
＞3	≥40	Female	Black	Divorced	21~50	Unknown	Unknown	Unknown	T1	N1	No	No	No	No	No/Unknown	No/Unknown
≤3	≥40	Male	White	Unmarried	51~100	Unknown	Unknown	Unknown	T1	N0	No	No	No	No	No/Unknown	No/Unknown
≤3	≥40	Male	White	Married	＞100	Grade II	Positive	Unknown	T3	N0	No	No	Yes	No	No/Unknown	Yes
≤3	≥40	Male	White	Divorced	Unknown	Unknown	Unknown	Unknown	TX	N0	No	No	No	No	No/Unknown	Yes
≤3	≥40	Female	White	Widowed	Unknown	Grade II	Unknown	Unknown	T1	N0	Yes	No	No	No	No/Unknown	Yes
≤3	≥40	Male	Others	Married	＞100	Grade II	Unknown	Unknown	T4	N0	No	No	Yes	No	Yes	No/Unknown
＞3	≥40	Male	White	Married	≤20	Unknown	Positive	Unknown	T2	N0	Yes	No	No	No	No/Unknown	Yes
≤3	≥40	Male	White	Married	＞100	Unknown	Positive	Ishak 0-4	T3	N1	No	No	No	No	Yes	No/Unknown
＞3	≥40	Male	White	Unmarried	21~50	Grade III	Negative	Unknown	T1	N0	Yes	Yes	No	No	Yes	Yes
＞3	≥40	Male	White	Married	21~50	Grade II	Positive	Ishak 0-4	T2	N0	No	No	Yes	No	No/Unknown	Yes
＞3	≥40	Female	White	Divorced	21~50	Grade I	Positive	Ishak 5-6	T2	N1	No	No	No	No	Yes	Yes
≤3	≥40	Male	White	Married	Unknown	Unknown	Negative	Unknown	T3	N0	Yes	No	No	No	No/Unknown	No/Unknown
≤3	≥40	Female	White	Widowed	21~50	Unknown	Negative	Ishak 5-6	T2	N1	No	No	No	No	No/Unknown	No/Unknown
≤3	≥40	Male	Others	Married	51~100	Unknown	Positive	Unknown	T4	N0	No	No	Yes	No	No/Unknown	No/Unknown
≤3	≥40	Male	White	Married	＞100	Unknown	Positive	Unknown	T2	N0	No	No	Yes	No	Yes	No/Unknown
≤3	≥40	Male	White	Married	51~100	Unknown	Negative	Unknown	TX	NX	No	No	No	No	No/Unknown	No/Unknown
≤3	≥40	Female	White	Married	21~50	Unknown	Negative	Ishak 5-6	T2	N0	No	No	Yes	No	No/Unknown	Yes
≤3	≥40	Male	Black	Divorced	Unknown	Unknown	Positive	Unknown	T3	N0	No	No	Yes	No	Yes	Yes
＞3	≥40	Male	White	Unmarried	Unknown	Unknown	Positive	Unknown	TX	N1	No	No	No	No	No/Unknown	Yes
＞3	≥40	Male	Black	Unmarried	51~100	Grade I	Negative	Ishak 5-6	T3	N1	No	No	No	No	No/Unknown	Yes
＞3	≥40	Male	White	Married	51~100	Grade II	Positive	Unknown	T1	N0	No	No	Yes	No	No/Unknown	Yes
≤3	≥40	Female	White	Widowed	Unknown	Unknown	Positive	Unknown	TX	N0	No	No	Yes	No	No/Unknown	No/Unknown
≤3	≥40	Male	White	Married	Unknown	Unknown	Positive	Ishak 5-6	T3	N0	Unknown	Unknown	Unknown	No	No/Unknown	Yes
≤3	≥40	Male	White	Married	≤20	Grade III	Unknown	Ishak 0-4	TX	N1	No	No	Yes	No	No/Unknown	Yes
＞3	≥40	Male	Black	Divorced	Unknown	Unknown	Unknown	Unknown	TX	NX	Unknown	No	No	No	No/Unknown	No/Unknown
≤3	≥40	Female	Black	Widowed	＞100	Grade III	Positive	Unknown	T3	N1	No	No	Yes	No	No/Unknown	No/Unknown
＞3	≥40	Female	White	Married	Unknown	Grade I	Positive	Unknown	T3	N1	No	No	No	No	Yes	Yes
≤3	≥40	Male	Black	Unmarried	＞100	Unknown	Positive	Ishak 0-4	T3	N0	No	No	Yes	No	No/Unknown	Yes
≤3	≥40	Male	White	Married	＞100	Grade II	Positive	Ishak 0-4	T3	N1	No	No	No	No	No/Unknown	Yes
＞3	≥40	Male	Black	Married	＞100	Unknown	Positive	Unknown	T3	N0	Yes	No	No	No	No/Unknown	No/Unknown
≤3	≥40	Male	White	Married	21~50	Grade III	Unknown	Unknown	T3	N0	No	No	Yes	No	No/Unknown	No/Unknown
≤3	≥40	Male	Black	Married	＞100	Grade II	Positive	Unknown	T3	N1	No	No	No	No	No/Unknown	No/Unknown
＞3	＜40	Female	White	Unmarried	＞100	Unknown	Negative	Ishak 0-4	T4	N1	No	No	No	No	No/Unknown	Yes
＞3	≥40	Female	White	Married	＞100	Grade III	Positive	Unknown	T4	N1	No	No	No	No	Yes	Yes
＞3	≥40	Male	Black	Unknown	51~100	Grade I	Positive	Unknown	T1	N0	Unknown	Unknown	Unknown	No	No/Unknown	Yes
＞3	≥40	Male	White	Divorced	51~100	Grade II	Positive	Ishak 5-6	T3	N0	Yes	Yes	No	No	Yes	No/Unknown
≤3	≥40	Male	Black	Unmarried	51~100	Unknown	Positive	Ishak 5-6	T3	N0	Yes	No	Yes	No	No/Unknown	Yes
≤3	≥40	Male	White	Married	Unknown	Grade II	Positive	Unknown	TX	N0	No	No	Yes	No	No/Unknown	No/Unknown
≤3	≥40	Male	White	Married	51~100	Grade II	Positive	Ishak 5-6	T3	N0	No	No	Yes	No	No/Unknown	No/Unknown
＞3	≥40	Male	White	Married	21~50	Unknown	Negative	Unknown	T2	N0	Yes	No	No	No	Yes	No/Unknown
＞3	＜40	Female	White	Unmarried	＞100	Unknown	Negative	Ishak 5-6	T4	NX	No	No	No	No	No/Unknown	Yes
＞3	≥40	Male	White	Unmarried	Unknown	Unknown	Positive	Ishak 5-6	TX	N1	No	No	No	No	No/Unknown	Yes
＞3	≥40	Male	Black	Unmarried	51~100	Grade II	Positive	Ishak 5-6	T1	N0	Yes	No	Yes	No	Yes	Yes
≤3	≥40	Male	Black	Divorced	Unknown	Unknown	Positive	Unknown	TX	N0	No	No	No	No	No/Unknown	No/Unknown
≤3	≥40	Male	Black	Unmarried	51~100	Unknown	Positive	Unknown	T3	N0	Yes	No	Yes	No	No/Unknown	Yes
≤3	≥40	Male	Black	Unmarried	Unknown	Unknown	Unknown	Unknown	TX	NX	Yes	No	No	No	No/Unknown	No/Unknown
≤3	≥40	Male	Black	Married	51~100	Grade II	Positive	Unknown	T3	N0	No	No	No	No	No/Unknown	No/Unknown
＞3	＜40	Male	Black	Unmarried	51~100	Unknown	Positive	Ishak 5-6	T3	N0	No	No	No	No	Yes	Yes
＞3	≥40	Male	White	Married	＞100	Grade II	Positive	Unknown	T4	N1	No	No	Yes	No	No/Unknown	No/Unknown
＞3	≥40	Female	White	Married	51~100	Grade III	Positive	Ishak 5-6	T2	N0	No	No	No	Wedge resection	No/Unknown	No/Unknown
＞3	≥40	Male	White	Divorced	51~100	Grade II	Negative	Unknown	T3	N0	No	No	No	Local tumor destruction	Yes	No/Unknown
＞3	≥40	Female	White	Married	21~50	Unknown	Positive	Ishak 5-6	T2	N0	Yes	No	No	No	No/Unknown	Yes
＞3	≥40	Male	White	Married	51~100	Unknown	Unknown	Ishak 0-4	T3	N0	Yes	No	No	No	Yes	Yes
＞3	≥40	Male	White	Widowed	51~100	Unknown	Negative	Unknown	T3	N0	No	No	Yes	No	No/Unknown	No/Unknown
≤3	≥40	Female	Black	Unmarried	Unknown	Unknown	Negative	Ishak 0-4	TX	N0	No	No	No	No	No/Unknown	No/Unknown
＞3	≥40	Male	White	Unknown	≤20	Grade I	Positive	Unknown	T3	N0	Yes	No	No	No	No/Unknown	Yes
≤3	≥40	Male	Black	Married	Unknown	Unknown	Positive	Unknown	TX	NX	No	No	No	No	No/Unknown	No/Unknown
≤3	≥40	Male	Black	Unmarried	＞100	Unknown	Positive	Unknown	T3	N0	No	No	Yes	No	No/Unknown	No/Unknown
＞3	≥40	Male	White	Unmarried	51~100	Unknown	Positive	Unknown	T4	N0	Yes	No	No	No	No/Unknown	Yes
＞3	≥40	Male	White	Married	51~100	Unknown	Positive	Unknown	T3	N0	No	No	No	No	Yes	No/Unknown
≤3	≥40	Female	Black	Unmarried	＞100	Unknown	Positive	Unknown	T3	N0	No	No	Yes	No	No/Unknown	No/Unknown
≤3	≥40	Male	Black	Married	51~100	Unknown	Negative	Unknown	T3	N0	Yes	No	No	No	No/Unknown	No/Unknown
＞3	≥40	Male	Black	Married	＞100	Grade I	Positive	Unknown	T3	N0	Yes	No	No	No	Yes	No/Unknown
＞3	≥40	Male	White	Unknown	51~100	Grade III	Positive	Unknown	T3	N1	Yes	No	No	No	Yes	Yes
≤3	≥40	Female	White	Divorced	Unknown	Unknown	Positive	Unknown	TX	N1	No	No	No	No	No/Unknown	No/Unknown
≤3	≥40	Male	White	Married	＞100	Unknown	Unknown	Unknown	T3	N0	No	No	Yes	No	No/Unknown	No/Unknown
≤3	≥40	Male	White	Divorced	51~100	Grade III	Positive	Unknown	T1	N0	Yes	No	No	No	Yes	Yes
≤3	≥40	Male	Black	Married	21~50	Grade I	Positive	Ishak 0-4	T2	N0	Yes	No	No	No	Yes	No/Unknown
≤3	≥40	Male	White	Married	21~50	Unknown	Positive	Ishak 5-6	T2	N0	Yes	No	No	No	Yes	No/Unknown
＞3	≥40	Male	White	Married	Unknown	Unknown	Positive	Unknown	T4	N1	No	No	No	No	No/Unknown	Yes
≤3	≥40	Female	White	Married	21~50	Unknown	Positive	Unknown	T1	N0	No	Yes	No	No	No/Unknown	No/Unknown
≤3	≥40	Female	Black	Married	Unknown	Unknown	Positive	Unknown	T3	N0	No	No	No	No	No/Unknown	Yes
≤3	≥40	Male	White	Married	＞100	Unknown	Positive	Unknown	T3	N0	No	No	Yes	No	No/Unknown	No/Unknown
≤3	≥40	Male	White	Unknown	21~50	Grade III	Positive	Unknown	T2	N1	No	No	Yes	No	No/Unknown	No/Unknown
≤3	≥40	Female	Black	Unmarried	51~100	Unknown	Negative	Unknown	T3	N0	No	No	Yes	No	No/Unknown	No/Unknown
≤3	≥40	Male	White	Unmarried	Unknown	Grade IV	Positive	Unknown	T3	N1	No	No	No	No	No/Unknown	No/Unknown
≤3	≥40	Male	White	Married	Unknown	Grade III	Positive	Unknown	TX	NX	No	No	No	No	No/Unknown	No/Unknown
＞3	≥40	Male	White	Divorced	＞100	Grade II	Unknown	Unknown	T3	N0	Yes	No	No	No	Yes	Yes
≤3	≥40	Male	Black	Unmarried	＞100	Unknown	Positive	Unknown	T3	N0	No	No	No	No	No/Unknown	No/Unknown
＞3	≥40	Male	Black	Married	Unknown	Unknown	Unknown	Unknown	T3	N0	Yes	No	No	No	No/Unknown	Yes
≤3	≥40	Female	Black	Unmarried	＞100	Unknown	Unknown	Unknown	T1	N0	No	No	No	No	No/Unknown	No/Unknown
≤3	≥40	Female	Black	Unmarried	21~50	Unknown	Positive	Unknown	T2	N1	No	No	Yes	No	No/Unknown	No/Unknown
≤3	＜40	Male	Others	Married	Unknown	Unknown	Positive	Unknown	TX	N0	No	No	Yes	No	No/Unknown	No/Unknown
＞3	≥40	Male	White	Married	21~50	Unknown	Positive	Unknown	T2	N0	No	No	Yes	No	No/Unknown	Yes
＞3	≥40	Male	White	Unknown	＞100	Unknown	Unknown	Unknown	T1	N1	No	No	No	No	No/Unknown	No/Unknown
＞3	≥40	Male	Others	Unknown	Unknown	Grade I	Negative	Ishak 5-6	TX	N0	Yes	No	No	No	Yes	Yes
≤3	≥40	Male	Others	Married	21~50	Unknown	Negative	Unknown	T2	N1	Yes	No	No	No	No/Unknown	No/Unknown
≤3	≥40	Male	White	Widowed	Unknown	Unknown	Positive	Unknown	T1	N0	No	No	Yes	No	No/Unknown	No/Unknown
≤3	≥40	Male	Others	Married	＞100	Unknown	Positive	Ishak 5-6	T3	N0	Yes	No	No	No	No/Unknown	No/Unknown
＞3	≥40	Male	Others	Married	Unknown	Grade III	Unknown	Unknown	TX	NX	No	No	Yes	No	No/Unknown	No/Unknown
＞3	≥40	Female	Others	Unmarried	21~50	Unknown	Positive	Unknown	T3	N0	No	No	No	No	No/Unknown	Yes
≤3	≥40	Male	Others	Married	＞100	Grade III	Negative	Unknown	T4	NX	No	No	Yes	No	No/Unknown	Yes
≤3	≥40	Male	Others	Unmarried	≤20	Unknown	Positive	Ishak 5-6	T2	N0	Yes	No	No	No	Yes	No/Unknown
＞3	≥40	Male	Others	Married	＞100	Grade I	Positive	Unknown	T3	N0	No	No	Yes	No	No/Unknown	Yes
≤3	≥40	Male	White	Unknown	21~50	Unknown	Positive	Unknown	T3	N0	No	Yes	No	No	No/Unknown	No/Unknown
≤3	≥40	Male	White	Married	Unknown	Grade III	Unknown	Unknown	TX	N0	Yes	No	Unknown	No	Yes	Yes
≤3	≥40	Male	Others	Married	51~100	Grade II	Positive	Unknown	T4	NX	No	Unknown	Yes	No	No/Unknown	Yes
≤3	≥40	Male	Others	Married	51~100	Unknown	Unknown	Unknown	T3	N0	Yes	No	No	No	No/Unknown	No/Unknown
≤3	≥40	Male	Others	Unmarried	Unknown	Unknown	Unknown	Unknown	TX	NX	Yes	Unknown	Unknown	No	No/Unknown	No/Unknown
≤3	≥40	Male	Others	Widowed	＞100	Unknown	Negative	Unknown	T1	N0	No	No	Yes	No	No/Unknown	No/Unknown
≤3	≥40	Male	White	Unmarried	＞100	Unknown	Positive	Unknown	T3	N1	No	No	Yes	No	No/Unknown	No/Unknown
＞3	＜40	Male	Others	Married	21~50	Unknown	Positive	Unknown	T2	N0	Yes	No	No	No	Yes	No/Unknown
≤3	≥40	Male	Others	Widowed	＞100	Unknown	Positive	Unknown	T3	N0	No	No	Yes	No	No/Unknown	Yes
≤3	≥40	Male	Others	Married	＞100	Unknown	Positive	Unknown	T3	NX	Yes	No	No	No	No/Unknown	No/Unknown
＞3	≥40	Male	Others	Widowed	51~100	Grade II	Positive	Unknown	T3	N1	No	No	No	No	No/Unknown	No/Unknown
≤3	≥40	Male	Others	Divorced	51~100	Unknown	Positive	Unknown	T1	NX	Yes	No	No	No	Yes	Yes
≤3	≥40	Male	Others	Married	51~100	Unknown	Positive	Unknown	T4	N0	No	No	No	No	No/Unknown	No/Unknown
＞3	≥40	Male	White	Married	Unknown	Grade III	Positive	Unknown	TX	N0	Yes	No	No	No	Yes	Yes
＞3	≥40	Female	Others	Widowed	Unknown	Unknown	Unknown	Unknown	TX	NX	Yes	Unknown	Unknown	No	No/Unknown	No/Unknown
＞3	≥40	Male	Others	Divorced	＞100	Unknown	Negative	Unknown	T4	N0	No	No	No	No	No/Unknown	No/Unknown
＞3	≥40	Male	White	Widowed	51~100	Grade III	Positive	Unknown	T3	N0	No	No	No	No	No/Unknown	No/Unknown
＞3	≥40	Male	Others	Separated	≤20	Grade III	Positive	Ishak 0-4	T2	N0	No	No	Yes	Wedge resection	No/Unknown	Yes
＞3	≥40	Male	Others	Unknown	Unknown	Grade II	Positive	Unknown	TX	N0	No	No	Yes	No	No/Unknown	Yes
≤3	≥40	Male	Others	Unmarried	51~100	Unknown	Unknown	Unknown	T1	N0	Yes	No	No	No	Yes	No/Unknown
≤3	≥40	Male	Others	Married	51~100	Unknown	Unknown	Unknown	T4	NX	Unknown	Unknown	Unknown	No	No/Unknown	No/Unknown
＞3	≥40	Male	Others	Married	Unknown	Unknown	Unknown	Unknown	TX	NX	Yes	Unknown	Unknown	No	Yes	Yes
≤3	≥40	Male	White	Married	21~50	Unknown	Positive	Unknown	T2	N0	Yes	No	No	No	No/Unknown	Yes
≤3	≥40	Male	Others	Married	21~50	Unknown	Positive	Unknown	T3	N0	No	No	No	No	No/Unknown	No/Unknown
≤3	≥40	Female	Others	Unmarried	Unknown	Unknown	Positive	Unknown	T2	N0	Unknown	Unknown	Yes	No	No/Unknown	No/Unknown
＞3	≥40	Male	Others	Married	21~50	Grade II	Negative	Unknown	T2	N0	No	No	No	No	No/Unknown	No/Unknown
＞3	≥40	Male	Others	Married	51~100	Grade II	Unknown	Unknown	TX	NX	No	No	Yes	No	No/Unknown	No/Unknown
≤3	≥40	Male	Others	Married	＞100	Unknown	Positive	Unknown	T1	N0	Yes	No	No	No	No/Unknown	No/Unknown
＞3	≥40	Male	Others	Divorced	51~100	Unknown	Positive	Unknown	T1	N0	Yes	No	No	No	Yes	No/Unknown
≤3	≥40	Female	Others	Widowed	51~100	Unknown	Positive	Unknown	T3	N0	No	No	Yes	No	No/Unknown	No/Unknown
≤3	≥40	Male	Others	Married	＞100	Grade III	Positive	Unknown	T3	N1	No	No	No	No	No/Unknown	Yes
≤3	≥40	Male	Others	Unknown	21~50	Grade III	Positive	Unknown	T2	N0	No	No	Yes	No	No/Unknown	No/Unknown
≤3	≥40	Male	Others	Divorced	51~100	Unknown	Positive	Unknown	T3	N1	No	No	No	No	No/Unknown	No/Unknown
≤3	≥40	Male	Others	Unmarried	＞100	Unknown	Positive	Unknown	T3	N0	Yes	No	No	No	Yes	No/Unknown
＞3	≥40	Male	Others	Married	＞100	Grade III	Positive	Unknown	T4	N0	Yes	No	No	Wedge resection	Yes	No/Unknown
＞3	≥40	Male	Others	Unmarried	51~100	Unknown	Positive	Unknown	T4	N0	No	No	No	No	No/Unknown	Yes
＞3	≥40	Female	White	Married	21~50	Unknown	Positive	Unknown	T2	N0	Yes	No	No	Local tumor destruction	Yes	No/Unknown
≤3	≥40	Male	Others	Unknown	Unknown	Unknown	Unknown	Unknown	TX	NX	Yes	No	No	No	No/Unknown	No/Unknown
≤3	≥40	Male	Others	Unmarried	＞100	Grade III	Negative	Unknown	T3	NX	No	No	No	No	No/Unknown	Yes
≤3	≥40	Male	Others	Widowed	Unknown	Grade I	Unknown	Unknown	TX	N0	No	No	No	No	No/Unknown	Yes
≤3	≥40	Male	Others	Unmarried	51~100	Unknown	Positive	Unknown	T3	N0	Yes	No	No	No	No/Unknown	No/Unknown
≤3	≥40	Female	Others	Married	≤20	Unknown	Positive	Unknown	T1	N0	No	No	Yes	No	No/Unknown	No/Unknown
≤3	≥40	Female	Others	Divorced	＞100	Grade III	Unknown	Unknown	T4	N1	Yes	No	Yes	No	Yes	No/Unknown
≤3	≥40	Female	Others	Married	21~50	Unknown	Positive	Unknown	T1	N1	No	No	No	No	No/Unknown	Yes
＞3	≥40	Male	Others	Married	21~50	Grade II	Negative	Unknown	T1	N0	Yes	No	No	No	Yes	Yes
≤3	≥40	Male	Others	Unmarried	51~100	Grade II	Positive	Ishak 0-4	T4	NX	No	No	No	No	No/Unknown	No/Unknown
＞3	≥40	Male	Others	Widowed	＞100	Grade II	Positive	Ishak 0-4	T3	N0	Yes	No	Yes	No	Yes	Yes
≤3	≥40	Female	Others	Separated	＞100	Unknown	Positive	Unknown	T3	N0	No	No	Yes	No	No/Unknown	Yes
＞3	＜40	Male	Others	Married	＞100	Grade III	Negative	Ishak 0-4	T4	N1	No	No	Yes	Lobectomy	No/Unknown	Yes
≤3	≥40	Male	Others	Married	51~100	Unknown	Positive	Unknown	T3	NX	No	No	No	No	No/Unknown	No/Unknown
＞3	≥40	Male	Others	Married	51~100	Grade II	Positive	Unknown	T3	N1	No	No	No	No	No/Unknown	Yes
≤3	≥40	Male	White	Separated	51~100	Unknown	Positive	Unknown	T1	N1	Yes	No	No	No	Yes	No/Unknown
≤3	≥40	Female	Others	Married	Unknown	Unknown	Negative	Unknown	TX	N0	No	No	Yes	No	No/Unknown	No/Unknown
≤3	≥40	Male	Others	Divorced	＞100	Unknown	Positive	Unknown	T3	N0	No	No	Yes	No	No/Unknown	No/Unknown
≤3	≥40	Male	Others	Married	51~100	Unknown	Positive	Unknown	TX	N0	Yes	No	Yes	No	Yes	Yes
≤3	≥40	Female	Others	Married	＞100	Unknown	Positive	Unknown	T3	N1	No	No	Unknown	No	No/Unknown	No/Unknown
≤3	≥40	Male	Others	Divorced	21~50	Grade II	Negative	Unknown	T2	NX	No	No	No	No	No/Unknown	No/Unknown
＞3	≥40	Male	Others	Married	51~100	Unknown	Unknown	Unknown	T1	NX	Yes	No	No	No	Yes	No/Unknown
≤3	≥40	Male	Others	Married	51~100	Unknown	Positive	Unknown	T3	N0	Yes	No	Yes	No	No/Unknown	Yes
＞3	≥40	Male	Others	Married	＞100	Unknown	Positive	Unknown	T1	N0	Yes	No	No	No	Yes	Yes
＞3	≥40	Male	White	Married	Unknown	Grade III	Positive	Unknown	T3	N1	No	No	No	No	Yes	Yes
＞3	≥40	Male	Others	Unmarried	51~100	Grade II	Positive	Unknown	T3	N0	No	No	Yes	No	No/Unknown	Yes
＞3	≥40	Female	Others	Unmarried	21~50	Unknown	Positive	Unknown	T2	N0	No	No	No	No	No/Unknown	Yes
≤3	≥40	Male	Others	Divorced	＞100	Unknown	Positive	Unknown	T4	N1	No	No	Yes	No	No/Unknown	No/Unknown
≤3	≥40	Male	Others	Divorced	51~100	Grade I	Positive	Ishak 5-6	TX	NX	No	No	Yes	No	No/Unknown	No/Unknown
≤3	≥40	Male	Others	Unknown	＞100	Unknown	Unknown	Unknown	T1	N0	Yes	No	No	No	No/Unknown	No/Unknown
≤3	≥40	Male	Others	Married	51~100	Unknown	Unknown	Unknown	T3	N0	No	No	No	No	No/Unknown	No/Unknown
＞3	≥40	Male	Others	Married	21~50	Unknown	Positive	Unknown	T3	N0	Yes	No	Yes	No	Yes	Yes
≤3	≥40	Male	White	Divorced	51~100	Unknown	Unknown	Unknown	T4	N1	No	No	Yes	No	No/Unknown	No/Unknown
≤3	≥40	Male	Others	Married	＞100	Unknown	Positive	Ishak 0-4	T3	N0	No	No	Yes	No	No/Unknown	No/Unknown
＞3	≥40	Male	Others	Married	＞100	Unknown	Positive	Unknown	T3	N1	No	No	Yes	No	No/Unknown	Yes
＞3	≥40	Male	White	Unmarried	＞100	Unknown	Negative	Unknown	T3	N0	No	No	Yes	No	No/Unknown	Yes
≤3	≥40	Female	Others	Widowed	Unknown	Grade IV	Negative	Unknown	TX	N1	Yes	No	No	No	No/Unknown	Yes
≤3	≥40	Female	Others	Married	51~100	Grade IV	Unknown	Unknown	T1	N0	No	No	Yes	No	No/Unknown	No/Unknown
＞3	≥40	Male	Others	Married	＞100	Unknown	Negative	Unknown	T3	N0	Yes	No	No	No	Yes	Yes
≤3	≥40	Female	Others	Divorced	21~50	Unknown	Negative	Unknown	T1	N0	No	No	No	No	No/Unknown	No/Unknown
＞3	≥40	Male	White	Unmarried	≤20	Unknown	Positive	Ishak 5-6	T4	N1	No	No	No	No	No/Unknown	No/Unknown
≤3	≥40	Male	Others	Married	21~50	Unknown	Positive	Ishak 5-6	T2	NX	No	No	No	No	No/Unknown	No/Unknown
≤3	≥40	Male	Others	Widowed	51~100	Unknown	Positive	Ishak 5-6	T3	NX	Yes	No	No	No	No/Unknown	No/Unknown
＞3	≥40	Male	Others	Married	＞100	Unknown	Positive	Unknown	T4	NX	No	No	No	No	No/Unknown	No/Unknown
≤3	≥40	Male	Others	Married	51~100	Unknown	Positive	Ishak 5-6	T1	NX	Yes	No	Yes	No	No/Unknown	No/Unknown
≤3	≥40	Male	Others	Married	＞100	Unknown	Positive	Unknown	T1	N0	No	No	Yes	No	No/Unknown	No/Unknown
＞3	≥40	Female	White	Divorced	51~100	Grade I	Negative	Unknown	T3	N1	No	No	No	No	No/Unknown	No/Unknown
≤3	≥40	Male	Others	Unmarried	51~100	Unknown	Positive	Unknown	T4	NX	No	No	Yes	No	No/Unknown	Yes
＞3	≥40	Female	Others	Unknown	Unknown	Unknown	Unknown	Unknown	TX	NX	No	No	Yes	No	No/Unknown	No/Unknown
＞3	≥40	Male	Others	Married	＞100	Unknown	Unknown	Unknown	T3	N0	No	No	No	No	No/Unknown	No/Unknown
≤3	≥40	Male	Others	Married	21~50	Unknown	Positive	Unknown	T1	N0	No	No	Yes	No	No/Unknown	No/Unknown
＞3	≥40	Male	Others	Married	51~100	Grade II	Positive	Unknown	T1	N0	No	No	Yes	No	No/Unknown	Yes
＞3	≥40	Male	Others	Unmarried	21~50	Grade II	Negative	Unknown	T3	N0	No	No	No	No	No/Unknown	No/Unknown
≤3	≥40	Male	Others	Married	51~100	Unknown	Unknown	Unknown	T1	N0	No	No	Yes	No	No/Unknown	No/Unknown
≤3	≥40	Female	White	Married	Unknown	Unknown	Unknown	Unknown	TX	N0	Yes	No	No	No	No/Unknown	No/Unknown
≤3	≥40	Male	Others	Married	51~100	Grade I	Positive	Ishak 5-6	T3	NX	Yes	No	Yes	No	Yes	Yes
≤3	≥40	Male	White	Divorced	Unknown	Unknown	Positive	Ishak 5-6	TX	N0	Yes	No	No	No	No/Unknown	No/Unknown
＞3	≥40	Male	White	Married	51~100	Unknown	Negative	Unknown	T1	NX	Unknown	Yes	No	No	No/Unknown	No/Unknown
≤3	≥40	Male	Others	Unknown	21~50	Unknown	Negative	Unknown	T2	N0	No	No	Yes	No	No/Unknown	No/Unknown
≤3	≥40	Male	Others	Unmarried	21~50	Unknown	Positive	Unknown	T1	N0	Yes	No	Yes	No	No/Unknown	No/Unknown
≤3	≥40	Male	White	Unmarried	51~100	Unknown	Positive	Ishak 5-6	T3	NX	No	No	No	No	No/Unknown	No/Unknown
＞3	≥40	Male	Others	Unmarried	＞100	Unknown	Positive	Unknown	T3	NX	No	No	No	No	No/Unknown	No/Unknown
≤3	≥40	Male	Others	Married	＞100	Unknown	Positive	Ishak 5-6	T3	NX	Yes	No	Yes	No	No/Unknown	No/Unknown
≤3	≥40	Male	Others	Divorced	＞100	Unknown	Positive	Unknown	T4	N0	No	No	No	No	No/Unknown	No/Unknown
≤3	≥40	Male	White	Divorced	51~100	Unknown	Positive	Unknown	T1	N0	Yes	No	No	No	No/Unknown	No/Unknown
＞3	≥40	Female	Others	Widowed	＞100	Unknown	Positive	Unknown	T1	NX	No	No	No	No	No/Unknown	No/Unknown
≤3	≥40	Male	White	Unmarried	51~100	Unknown	Positive	Unknown	T1	N0	No	Unknown	No	No	No/Unknown	No/Unknown
≤3	≥40	Male	Others	Unmarried	51~100	Unknown	Unknown	Unknown	T4	N1	No	No	No	No	No/Unknown	No/Unknown
＞3	≥40	Male	White	Married	21~50	Unknown	Unknown	Unknown	T2	N0	Yes	No	No	No	No/Unknown	No/Unknown
≤3	≥40	Male	White	Married	51~100	Unknown	Positive	Unknown	T3	N0	No	No	Yes	No	No/Unknown	No/Unknown
≤3	≥40	Male	White	Divorced	51~100	Grade I	Negative	Unknown	T3	N0	No	No	Yes	No	No/Unknown	Yes
≤3	≥40	Female	White	Married	51~100	Grade II	Positive	Unknown	T3	N1	Yes	No	No	No	No/Unknown	No/Unknown
＞3	≥40	Male	White	Married	51~100	Unknown	Negative	Unknown	T1	N0	No	No	Yes	No	No/Unknown	Yes
≤3	≥40	Female	White	Widowed	51~100	Unknown	Unknown	Unknown	T3	N1	No	No	Yes	No	No/Unknown	No/Unknown
＞3	≥40	Male	White	Widowed	＞100	Unknown	Positive	Unknown	T3	N1	Yes	No	No	No	No/Unknown	Yes
≤3	≥40	Male	Black	Unmarried	＞100	Unknown	Positive	Unknown	T1	N0	No	No	Yes	No	No/Unknown	No/Unknown
＞3	≥40	Female	White	Married	51~100	Grade III	Negative	Unknown	T1	N1	No	No	No	No	Yes	No/Unknown
＞3	≥40	Female	White	Unmarried	Unknown	Unknown	Positive	Unknown	T3	N1	No	No	No	No	No/Unknown	No/Unknown
＞3	≥40	Female	White	Widowed	21~50	Unknown	Positive	Ishak 5-6	T3	N1	No	No	Yes	No	No/Unknown	Yes
＞3	≥40	Female	White	Widowed	51~100	Grade II	Negative	Unknown	T1	N0	Yes	No	No	No	No/Unknown	No/Unknown
＞3	≥40	Male	Black	Divorced	Unknown	Unknown	Positive	Unknown	TX	N0	Yes	No	Yes	No	Yes	Yes
≤3	≥40	Male	White	Unmarried	Unknown	Grade IV	Positive	Unknown	TX	NX	No	No	No	No	No/Unknown	No/Unknown
≤3	≥40	Male	White	Widowed	Unknown	Unknown	Unknown	Unknown	TX	NX	No	No	Yes	No	No/Unknown	No/Unknown
＞3	≥40	Male	White	Married	51~100	Grade II	Unknown	Unknown	TX	NX	No	No	No	No	No/Unknown	Yes
≤3	≥40	Male	White	Divorced	21~50	Grade II	Negative	Unknown	T2	N0	Yes	No	Yes	No	No/Unknown	No/Unknown
＞3	≥40	Male	White	Married	Unknown	Grade II	Positive	Unknown	T2	N0	No	No	Yes	No	No/Unknown	Yes
≤3	≥40	Male	White	Married	51~100	Unknown	Positive	Unknown	T3	N0	No	No	No	No	No/Unknown	No/Unknown
≤3	≥40	Male	White	Unmarried	Unknown	Grade III	Unknown	Unknown	TX	NX	No	No	Yes	No	No/Unknown	No/Unknown
≤3	≥40	Male	White	Married	Unknown	Grade II	Positive	Unknown	TX	N1	No	No	No	No	No/Unknown	Yes
＞3	≥40	Male	White	Divorced	51~100	Unknown	Positive	Unknown	T3	N0	Yes	No	No	No	Yes	No/Unknown
≤3	≥40	Male	White	Married	Unknown	Grade II	Unknown	Unknown	TX	NX	No	No	No	No	No/Unknown	No/Unknown
≤3	≥40	Male	White	Unmarried	21~50	Unknown	Positive	Unknown	T2	N1	No	No	No	No	No/Unknown	No/Unknown
≤3	≥40	Male	Others	Married	21~50	Unknown	Positive	Unknown	T3	N0	No	No	No	No	No/Unknown	No/Unknown
≤3	≥40	Male	White	Married	Unknown	Grade I	Positive	Unknown	T1	NX	No	No	Yes	No	No/Unknown	Yes
＞3	≥40	Male	White	Married	＞100	Unknown	Positive	Unknown	T1	N0	Yes	No	No	No	No/Unknown	Yes
＞3	≥40	Male	White	Married	Unknown	Unknown	Positive	Unknown	T3	N0	No	No	No	No	No/Unknown	Yes
≤3	≥40	Male	White	Married	Unknown	Unknown	Positive	Unknown	TX	N0	Yes	No	Yes	No	No/Unknown	Yes
≤3	≥40	Male	White	Widowed	Unknown	Grade III	Positive	Unknown	TX	N0	No	No	No	No	No/Unknown	No/Unknown
≤3	≥40	Male	White	Unmarried	51~100	Unknown	Negative	Unknown	T3	N0	No	No	Yes	No	No/Unknown	No/Unknown
≤3	≥40	Male	White	Married	Unknown	Unknown	Unknown	Unknown	TX	NX	Yes	No	No	No	Yes	No/Unknown
≤3	≥40	Male	White	Divorced	51~100	Unknown	Positive	Ishak 5-6	T3	N1	Yes	No	No	No	No/Unknown	No/Unknown
＞3	≥40	Male	White	Married	＞100	Grade I	Positive	Unknown	T3	N0	No	No	No	No	Yes	Yes
≤3	≥40	Female	White	Married	Unknown	Grade III	Positive	Unknown	TX	N1	No	No	Yes	No	No/Unknown	No/Unknown
≤3	≥40	Male	White	Widowed	51~100	Unknown	Negative	Unknown	T3	N1	Unknown	Unknown	No	No	No/Unknown	No/Unknown
≤3	≥40	Male	White	Divorced	51~100	Unknown	Positive	Unknown	TX	NX	Yes	No	No	No	No/Unknown	No/Unknown
≤3	≥40	Male	White	Married	51~100	Grade III	Positive	Unknown	T3	N1	No	No	Yes	No	No/Unknown	No/Unknown
≤3	≥40	Male	White	Widowed	Unknown	Unknown	Unknown	Unknown	TX	N0	Unknown	Unknown	Yes	No	No/Unknown	No/Unknown
＞3	≥40	Male	White	Married	Unknown	Grade I	Negative	Unknown	T4	N0	No	No	Yes	No	No/Unknown	No/Unknown
≤3	≥40	Male	White	Married	Unknown	Unknown	Negative	Unknown	T3	N0	No	No	No	No	No/Unknown	No/Unknown
≤3	≥40	Male	White	Divorced	＞100	Unknown	Positive	Unknown	T3	N1	No	No	Yes	No	No/Unknown	No/Unknown
≤3	＜40	Male	Others	Unmarried	51~100	Unknown	Unknown	Unknown	T1	NX	No	No	Yes	No	No/Unknown	No/Unknown
≤3	≥40	Male	White	Married	≤20	Unknown	Positive	Ishak 5-6	T3	N0	No	No	No	No	No/Unknown	No/Unknown
≤3	≥40	Male	White	Divorced	21~50	Unknown	Positive	Ishak 5-6	T2	N0	Yes	No	No	No	No/Unknown	Yes
≤3	≥40	Male	Others	Divorced	51~100	Grade IV	Positive	Unknown	T1	N0	No	No	No	No	No/Unknown	No/Unknown
≤3	≥40	Male	Others	Separated	51~100	Unknown	Negative	Unknown	T1	N0	No	No	Unknown	No	No/Unknown	No/Unknown
＞3	≥40	Male	White	Married	＞100	Grade III	Positive	Unknown	T1	N0	No	No	No	No	No/Unknown	Yes
≤3	≥40	Female	White	Married	51~100	Unknown	Positive	Ishak 0-4	T3	N1	No	No	No	No	No/Unknown	Yes
＞3	≥40	Male	White	Divorced	21~50	Unknown	Positive	Unknown	T1	N0	No	No	No	No	No/Unknown	Yes
＞3	≥40	Male	White	Married	51~100	Unknown	Positive	Unknown	TX	NX	Yes	No	No	No	Yes	Yes
＞3	≥40	Male	White	Divorced	Unknown	Unknown	Positive	Ishak 5-6	T3	N1	Yes	No	No	No	Yes	Yes
＞3	≥40	Male	White	Unmarried	＞100	Unknown	Negative	Unknown	T3	NX	No	No	No	No	No/Unknown	Yes
≤3	≥40	Male	Black	Divorced	Unknown	Unknown	Positive	Unknown	T3	N1	Yes	No	Unknown	No	No/Unknown	Yes
≤3	≥40	Male	White	Divorced	Unknown	Grade II	Positive	Ishak 5-6	TX	N0	No	No	Yes	No	No/Unknown	No/Unknown
≤3	≥40	Male	Others	Married	＞100	Unknown	Positive	Unknown	T3	N0	No	No	Yes	No	No/Unknown	Yes
＞3	≥40	Male	Others	Married	＞100	Grade II	Positive	Unknown	T3	N0	No	No	Yes	No	No/Unknown	Yes
＞3	≥40	Male	White	Married	Unknown	Unknown	Unknown	Unknown	TX	N0	No	No	No	No	No/Unknown	No/Unknown
≤3	≥40	Male	White	Married	Unknown	Grade II	Positive	Unknown	T1	N0	No	No	Yes	No	No/Unknown	No/Unknown
＞3	≥40	Female	White	Married	＞100	Grade II	Negative	Unknown	T3	N1	No	No	No	No	Yes	Yes
＞3	≥40	Male	Black	Divorced	＞100	Unknown	Positive	Unknown	T3	N0	No	No	Yes	No	No/Unknown	No/Unknown
＞3	≥40	Male	White	Widowed	21~50	Grade II	Positive	Unknown	T3	N0	No	No	No	No	No/Unknown	Yes
≤3	≥40	Male	White	Divorced	21~50	Unknown	Positive	Unknown	T2	N0	No	No	No	No	No/Unknown	No/Unknown
≤3	≥40	Male	Others	Married	＞100	Unknown	Positive	Unknown	T4	N0	No	No	Yes	No	No/Unknown	No/Unknown
≤3	≥40	Female	White	Married	51~100	Unknown	Positive	Unknown	T3	N0	Yes	No	No	No	Yes	No/Unknown
＞3	≥40	Male	White	Married	21~50	Unknown	Positive	Unknown	T2	N0	Yes	No	No	No	Yes	Yes
＞3	≥40	Male	White	Married	51~100	Grade II	Positive	Unknown	T3	N0	No	No	Yes	No	Yes	Yes
≤3	≥40	Male	White	Divorced	＞100	Unknown	Positive	Unknown	T1	NX	No	No	No	No	No/Unknown	No/Unknown
≤3	≥40	Male	White	Widowed	Unknown	Unknown	Negative	Unknown	T1	NX	No	No	No	No	No/Unknown	No/Unknown
≤3	≥40	Male	Black	Married	Unknown	Unknown	Positive	Unknown	TX	N0	No	No	Yes	No	No/Unknown	No/Unknown
≤3	≥40	Male	White	Widowed	Unknown	Unknown	Positive	Unknown	TX	N0	Yes	No	No	No	Yes	No/Unknown
≤3	≥40	Male	White	Married	21~50	Grade III	Positive	Unknown	T1	N0	No	No	No	No	No/Unknown	Yes
≤3	≥40	Male	White	Married	21~50	Unknown	Positive	Ishak 5-6	T3	N0	No	No	No	No	No/Unknown	No/Unknown
≤3	≥40	Male	White	Married	Unknown	Unknown	Positive	Unknown	T1	NX	No	Unknown	Unknown	No	No/Unknown	No/Unknown
≤3	≥40	Male	White	Married	51~100	Unknown	Unknown	Unknown	T1	N1	No	No	No	No	No/Unknown	Yes
＞3	≥40	Male	White	Separated	21~50	Unknown	Positive	Ishak 5-6	T3	N0	No	No	Yes	No	No/Unknown	Yes
≤3	≥40	Male	White	Divorced	＞100	Unknown	Negative	Unknown	T3	N1	No	No	No	No	No/Unknown	Yes
＞3	≥40	Male	White	Married	51~100	Unknown	Unknown	Unknown	T3	N1	No	No	No	No	No/Unknown	Yes
≤3	≥40	Male	White	Widowed	＞100	Unknown	Unknown	Unknown	T3	N1	No	No	Yes	No	No/Unknown	No/Unknown
＞3	≥40	Female	White	Married	Unknown	Unknown	Positive	Unknown	T3	N0	No	No	No	No	No/Unknown	Yes
＞3	≥40	Male	White	Married	Unknown	Grade III	Negative	Unknown	TX	N0	No	No	Yes	No	No/Unknown	Yes
≤3	≥40	Male	White	Married	Unknown	Grade III	Positive	Unknown	T3	N1	No	No	Yes	No	No/Unknown	Yes
≤3	≥40	Female	Black	Widowed	21~50	Unknown	Positive	Ishak 5-6	T3	N0	Unknown	Unknown	Unknown	No	No/Unknown	No/Unknown
≤3	≥40	Male	White	Married	21~50	Unknown	Unknown	Unknown	T3	N0	Yes	No	No	No	Yes	Yes
＞3	≥40	Male	White	Married	Unknown	Grade III	Positive	Unknown	T3	NX	No	No	No	No	No/Unknown	No/Unknown
≤3	≥40	Male	White	Married	＞100	Unknown	Positive	Unknown	T3	N1	No	No	No	No	No/Unknown	Yes
≤3	≥40	Male	White	Married	＞100	Unknown	Positive	Unknown	T1	N0	No	No	No	No	No/Unknown	No/Unknown
≤3	≥40	Male	White	Divorced	＞100	Grade III	Positive	Ishak 5-6	T3	N1	No	No	No	No	No/Unknown	No/Unknown
≤3	≥40	Female	White	Married	＞100	Grade III	Positive	Unknown	T1	N0	No	No	Yes	No	No/Unknown	No/Unknown
＞3	≥40	Female	White	Married	＞100	Unknown	Unknown	Unknown	T3	N0	No	No	Yes	No	No/Unknown	Yes
≤3	≥40	Male	White	Married	＞100	Unknown	Unknown	Unknown	T3	NX	No	No	Yes	No	No/Unknown	No/Unknown
≤3	≥40	Male	White	Unmarried	51~100	Unknown	Positive	Unknown	T3	N1	No	No	No	No	No/Unknown	No/Unknown
＞3	≥40	Male	Others	Unmarried	＞100	Unknown	Positive	Ishak 0-4	T3	N0	No	No	Yes	No	No/Unknown	Yes
≤3	≥40	Male	White	Unmarried	51~100	Unknown	Positive	Ishak 0-4	T3	NX	Yes	No	Yes	No	No/Unknown	No/Unknown
≤3	≥40	Male	White	Married	Unknown	Unknown	Positive	Unknown	TX	NX	No	No	Yes	No	No/Unknown	No/Unknown
＞3	≥40	Male	White	Widowed	Unknown	Grade III	Positive	Unknown	TX	N0	No	No	Yes	No	No/Unknown	Yes
≤3	≥40	Female	White	Unmarried	＞100	Unknown	Positive	Unknown	T3	N1	No	No	Yes	No	No/Unknown	No/Unknown
≤3	≥40	Male	White	Married	Unknown	Unknown	Positive	Unknown	T3	N1	Yes	No	No	No	Yes	No/Unknown
≤3	≥40	Male	White	Unmarried	≤20	Unknown	Unknown	Unknown	T1	NX	No	No	No	No	No/Unknown	Yes
≤3	≥40	Male	Others	Married	51~100	Unknown	Positive	Unknown	T3	N0	No	No	Yes	No	No/Unknown	No/Unknown
＞3	≥40	Male	White	Married	≤20	Unknown	Positive	Unknown	T1	N0	Yes	No	Yes	No	Yes	Yes
＞3	≥40	Female	White	Married	51~100	Unknown	Positive	Unknown	T3	N1	No	No	No	No	No/Unknown	Yes
＞3	≥40	Male	White	Married	Unknown	Unknown	Positive	Ishak 5-6	TX	N0	Unknown	No	No	No	No/Unknown	No/Unknown
≤3	≥40	Male	Others	Divorced	Unknown	Unknown	Positive	Unknown	T4	N0	No	No	Yes	No	Yes	No/Unknown
＞3	＜40	Female	Black	Unknown	＞100	Unknown	Positive	Unknown	T3	N0	No	No	Yes	No	No/Unknown	Yes
≤3	≥40	Male	White	Married	21~50	Grade II	Unknown	Unknown	T3	NX	No	No	Yes	No	No/Unknown	No/Unknown
＞3	≥40	Female	White	Divorced	Unknown	Grade I	Unknown	Unknown	T1	NX	No	No	No	No	No/Unknown	No/Unknown
≤3	≥40	Female	White	Widowed	21~50	Unknown	Positive	Unknown	T1	N0	Yes	No	No	No	Yes	No/Unknown
＞3	≥40	Male	White	Married	＞100	Unknown	Negative	Ishak 5-6	T3	NX	Yes	No	No	No	Yes	Yes
＞3	≥40	Male	White	Divorced	21~50	Unknown	Negative	Ishak 5-6	T2	N1	No	No	No	No	No/Unknown	Yes
≤3	≥40	Male	White	Widowed	＞100	Unknown	Unknown	Unknown	TX	N1	No	No	Yes	No	No/Unknown	No/Unknown
≤3	≥40	Male	White	Unmarried	Unknown	Unknown	Unknown	Unknown	TX	N0	Yes	No	No	No	No/Unknown	No/Unknown
≤3	≥40	Female	White	Married	51~100	Unknown	Positive	Unknown	T1	N0	No	No	No	No	No/Unknown	Yes
≤3	≥40	Male	White	Married	Unknown	Grade IV	Unknown	Unknown	TX	N0	Yes	No	Yes	No	No/Unknown	No/Unknown
≤3	≥40	Male	White	Married	Unknown	Grade I	Positive	Unknown	TX	N0	Yes	No	No	No	No/Unknown	No/Unknown
≤3	≥40	Male	White	Married	Unknown	Grade III	Negative	Unknown	TX	N0	Yes	No	Yes	No	No/Unknown	Yes
≤3	≥40	Male	White	Unknown	＞100	Unknown	Unknown	Unknown	TX	N0	No	No	Yes	No	No/Unknown	No/Unknown
≤3	≥40	Male	White	Married	Unknown	Unknown	Negative	Unknown	TX	N0	No	No	Yes	No	No/Unknown	No/Unknown
≤3	≥40	Male	Black	Unmarried	Unknown	Unknown	Positive	Unknown	TX	NX	Unknown	No	Yes	No	No/Unknown	No/Unknown
≤3	≥40	Female	White	Divorced	51~100	Grade III	Positive	Unknown	T3	N1	No	No	Yes	No	No/Unknown	Yes
≤3	≥40	Male	White	Married	Unknown	Grade II	Positive	Unknown	TX	NX	No	No	Yes	No	No/Unknown	No/Unknown
＞3	≥40	Female	Black	Married	51~100	Grade III	Negative	Ishak 0-4	T3	N1	Yes	No	No	No	Yes	Yes
＞3	≥40	Male	White	Married	Unknown	Grade II	Unknown	Unknown	TX	NX	Yes	No	No	No	Yes	Yes
≤3	≥40	Female	White	Divorced	＞100	Grade III	Unknown	Unknown	T3	N0	Yes	No	No	No	No/Unknown	No/Unknown
≤3	≥40	Male	White	Married	＞100	Grade II	Unknown	Unknown	T3	N0	Yes	No	Yes	No	Yes	Yes
＞3	≥40	Male	White	Unknown	51~100	Grade II	Positive	Unknown	T3	N1	No	No	No	No	No/Unknown	No/Unknown
≤3	≥40	Male	White	Widowed	Unknown	Unknown	Positive	Unknown	T4	N0	No	No	Yes	No	No/Unknown	No/Unknown
＞3	≥40	Male	White	Married	Unknown	Unknown	Positive	Unknown	TX	NX	No	No	Yes	No	No/Unknown	Yes
≤3	≥40	Female	White	Married	Unknown	Unknown	Unknown	Unknown	TX	NX	Unknown	Unknown	Unknown	No	No/Unknown	No/Unknown
≤3	≥40	Female	Others	Married	51~100	Grade III	Positive	Unknown	T3	NX	No	No	Yes	No	No/Unknown	No/Unknown
＞3	≥40	Male	White	Married	21~50	Grade III	Positive	Ishak 0-4	T1	N0	No	No	No	No	No/Unknown	Yes
≤3	≥40	Male	White	Divorced	51~100	Unknown	Positive	Unknown	TX	N0	No	No	Yes	No	No/Unknown	No/Unknown
≤3	≥40	Male	Black	Married	21~50	Grade II	Unknown	Unknown	T2	N0	No	No	No	No	No/Unknown	Yes
＞3	≥40	Male	White	Married	＞100	Grade II	Positive	Unknown	T1	N0	Yes	Yes	No	No	Yes	Yes
≤3	≥40	Male	White	Unmarried	Unknown	Unknown	Negative	Unknown	TX	NX	No	No	Yes	No	No/Unknown	No/Unknown
≤3	≥40	Female	Others	Unknown	51~100	Unknown	Positive	Unknown	T1	N0	Unknown	Unknown	No	No	No/Unknown	Yes
≤3	≥40	Male	White	Unmarried	Unknown	Unknown	Unknown	Unknown	TX	NX	No	Yes	Yes	No	Yes	No/Unknown
≤3	≥40	Male	Others	Married	51~100	Unknown	Positive	Unknown	T3	N1	No	No	No	No	No/Unknown	No/Unknown
≤3	＜40	Male	Others	Unknown	＞100	Unknown	Unknown	Ishak 5-6	TX	NX	Unknown	Unknown	Unknown	No	No/Unknown	No/Unknown
≤3	≥40	Male	White	Divorced	51~100	Unknown	Positive	Unknown	T2	NX	Yes	No	Yes	No	No/Unknown	Yes
＞3	≥40	Male	White	Widowed	21~50	Grade III	Unknown	Unknown	T2	N0	No	No	No	No	No/Unknown	No/Unknown
≤3	≥40	Male	White	Divorced	51~100	Grade I	Negative	Unknown	T4	N1	Unknown	Unknown	Unknown	No	No/Unknown	No/Unknown
≤3	≥40	Male	White	Married	Unknown	Grade II	Positive	Unknown	T1	N1	Yes	No	No	No	No/Unknown	No/Unknown
≤3	≥40	Male	White	Unmarried	＞100	Unknown	Positive	Unknown	T3	N0	No	No	Yes	Local tumor destruction	No/Unknown	Yes
＞3	≥40	Male	White	Married	＞100	Unknown	Positive	Unknown	T3	N1	No	No	No	No	No/Unknown	Yes
≤3	≥40	Male	White	Unmarried	＞100	Unknown	Positive	Unknown	T3	NX	Unknown	Unknown	Unknown	No	No/Unknown	No/Unknown
≤3	≥40	Male	White	Unmarried	Unknown	Unknown	Unknown	Unknown	TX	N0	Yes	No	No	No	No/Unknown	No/Unknown
≤3	≥40	Male	White	Unmarried	＞100	Unknown	Negative	Unknown	T1	N0	No	No	No	No	No/Unknown	No/Unknown
≤3	≥40	Male	White	Divorced	Unknown	Unknown	Unknown	Unknown	TX	N0	Yes	No	No	No	No/Unknown	No/Unknown
≤3	≥40	Male	White	Married	51~100	Unknown	Unknown	Unknown	T3	N0	No	No	Yes	No	No/Unknown	No/Unknown
＞3	≥40	Female	White	Widowed	21~50	Grade II	Positive	Unknown	T2	N0	No	No	No	No	Yes	Yes
＞3	≥40	Female	Others	Married	51~100	Grade II	Positive	Unknown	T4	N0	No	No	No	No	No/Unknown	Yes
≤3	≥40	Male	White	Unmarried	Unknown	Unknown	Positive	Unknown	TX	NX	No	No	No	No	No/Unknown	No/Unknown
≤3	≥40	Female	White	Divorced	51~100	Unknown	Unknown	Unknown	T3	N1	No	No	Yes	No	No/Unknown	No/Unknown
＞3	≥40	Female	Others	Married	21~50	Grade II	Positive	Unknown	TX	NX	Yes	No	No	Local tumor destruction	Yes	No/Unknown
＞3	≥40	Male	White	Unmarried	＞100	Grade III	Positive	Unknown	T4	N0	Yes	No	Yes	Lobectomy	Yes	Yes
≤3	≥40	Male	White	Unmarried	≤20	Grade IV	Unknown	Unknown	T3	N1	Unknown	Unknown	Unknown	No	No/Unknown	No/Unknown
≤3	≥40	Male	White	Unmarried	51~100	Unknown	Positive	Ishak 5-6	T4	N0	No	No	No	No	No/Unknown	No/Unknown
≤3	≥40	Male	White	Married	＞100	Grade III	Negative	Unknown	T3	N0	No	No	No	No	No/Unknown	No/Unknown
≤3	≥40	Male	White	Married	51~100	Grade III	Positive	Unknown	T2	N0	Yes	No	No	No	No/Unknown	No/Unknown
＞3	≥40	Male	White	Married	Unknown	Unknown	Unknown	Unknown	TX	NX	Yes	No	No	No	Yes	Yes
＞3	≥40	Male	White	Married	Unknown	Grade II	Unknown	Unknown	T4	NX	Yes	No	No	No	Yes	Yes
≤3	≥40	Male	White	Married	51~100	Grade III	Positive	Unknown	T3	N0	No	No	No	No	No/Unknown	No/Unknown
≤3	≥40	Male	White	Widowed	Unknown	Grade I	Positive	Unknown	T4	N0	No	No	Yes	No	No/Unknown	Yes
≤3	≥40	Male	White	Married	≤20	Unknown	Positive	Unknown	T2	N0	No	No	Yes	No	No/Unknown	No/Unknown
＞3	≥40	Male	White	Divorced	Unknown	Grade III	Unknown	Unknown	TX	NX	No	No	No	No	No/Unknown	Yes
≤3	≥40	Male	White	Married	＞100	Unknown	Positive	Unknown	T3	N0	No	No	Yes	No	No/Unknown	Yes
＞3	≥40	Male	White	Unmarried	51~100	Grade III	Positive	Unknown	T1	N0	No	No	Yes	No	No/Unknown	No/Unknown
＞3	≥40	Male	Others	Unmarried	Unknown	Grade III	Positive	Unknown	TX	NX	Yes	No	No	No	Yes	No/Unknown
≤3	≥40	Female	White	Widowed	Unknown	Unknown	Negative	Unknown	TX	N0	Yes	No	Yes	No	No/Unknown	No/Unknown
≤3	≥40	Male	White	Divorced	51~100	Unknown	Unknown	Unknown	T1	NX	Yes	No	No	No	Yes	Yes
≤3	≥40	Male	Others	Married	21~50	Unknown	Positive	Unknown	T2	N0	No	No	No	No	No/Unknown	No/Unknown
＞3	≥40	Male	White	Unknown	Unknown	Unknown	Negative	Unknown	TX	NX	No	Yes	No	Wedge resection	No/Unknown	No/Unknown
≤3	≥40	Male	White	Married	51~100	Unknown	Positive	Ishak 5-6	T3	N0	Yes	No	No	No	No/Unknown	No/Unknown
＞3	≥40	Male	White	Unmarried	Unknown	Grade III	Unknown	Unknown	TX	NX	No	No	No	No	No/Unknown	Yes
≤3	≥40	Male	White	Divorced	21~50	Unknown	Positive	Ishak 5-6	T2	N0	No	No	Yes	No	No/Unknown	No/Unknown
＞3	≥40	Male	White	Married	51~100	Unknown	Positive	Unknown	T1	N0	No	No	No	No	No/Unknown	Yes
＞3	≥40	Male	White	Unmarried	Unknown	Unknown	Unknown	Unknown	TX	N0	Yes	Unknown	Unknown	No	Yes	Yes
≤3	≥40	Female	Others	Married	Unknown	Grade III	Unknown	Unknown	TX	N0	No	No	Yes	No	No/Unknown	Yes
≤3	≥40	Male	White	Divorced	Unknown	Grade II	Positive	Unknown	TX	NX	No	No	Yes	No	No/Unknown	No/Unknown
≤3	≥40	Female	Others	Unmarried	Unknown	Unknown	Positive	Unknown	TX	NX	Unknown	Unknown	Unknown	No	No/Unknown	No/Unknown
≤3	≥40	Male	White	Unmarried	Unknown	Unknown	Positive	Ishak 5-6	TX	NX	No	No	Yes	No	No/Unknown	No/Unknown
≤3	≥40	Male	White	Married	＞100	Unknown	Positive	Unknown	T3	N0	No	No	Yes	No	No/Unknown	No/Unknown
≤3	≥40	Male	White	Divorced	＞100	Unknown	Positive	Unknown	T4	N0	No	No	Yes	No	No/Unknown	No/Unknown
≤3	≥40	Female	White	Married	51~100	Grade III	Negative	Unknown	T3	N1	No	No	No	No	No/Unknown	No/Unknown
≤3	≥40	Male	White	Married	51~100	Grade III	Unknown	Unknown	T1	N0	No	No	Yes	No	No/Unknown	Yes
≤3	≥40	Male	White	Married	Unknown	Unknown	Unknown	Unknown	TX	NX	Unknown	Unknown	Unknown	No	No/Unknown	No/Unknown
＞3	≥40	Male	White	Widowed	51~100	Grade III	Positive	Unknown	T3	N1	No	No	No	No	No/Unknown	Yes
≤3	≥40	Male	White	Married	＞100	Unknown	Positive	Unknown	T3	N1	No	No	No	No	No/Unknown	Yes
≤3	≥40	Female	White	Married	＞100	Grade III	Positive	Unknown	T1	N0	No	No	No	No	No/Unknown	No/Unknown
≤3	≥40	Male	White	Married	21~50	Unknown	Unknown	Unknown	T4	NX	No	No	Yes	No	No/Unknown	No/Unknown
＞3	≥40	Male	Black	Married	Unknown	Unknown	Positive	Unknown	TX	N0	Yes	No	No	No	No/Unknown	Yes
＞3	≥40	Female	Others	Widowed	21~50	Unknown	Positive	Ishak 5-6	T2	N0	Yes	No	No	No	No/Unknown	Yes
≤3	≥40	Male	White	Unknown	Unknown	Unknown	Positive	Ishak 0-4	T2	N1	Yes	No	Yes	No	No/Unknown	No/Unknown
＞3	≥40	Male	White	Divorced	21~50	Grade I	Positive	Unknown	T1	N0	No	No	Yes	No	No/Unknown	No/Unknown
＞3	≥40	Female	White	Widowed	＞100	Grade III	Unknown	Unknown	T1	N0	No	No	Yes	No	No/Unknown	No/Unknown
＞3	≥40	Male	White	Married	51~100	Grade II	Positive	Unknown	T1	N0	Yes	No	No	No	Yes	Yes
＞3	≥40	Male	White	Married	21~50	Unknown	Positive	Unknown	T2	N0	No	No	No	No	No/Unknown	No/Unknown
≤3	≥40	Male	White	Married	51~100	Unknown	Unknown	Unknown	T4	N0	No	No	No	No	No/Unknown	No/Unknown
≤3	≥40	Male	White	Married	Unknown	Grade III	Positive	Unknown	TX	NX	No	No	Yes	No	No/Unknown	No/Unknown
≤3	≥40	Male	White	Unmarried	Unknown	Unknown	Positive	Unknown	T1	NX	No	No	Yes	No	No/Unknown	No/Unknown
≤3	≥40	Male	White	Married	51~100	Grade III	Positive	Unknown	T3	N1	No	No	Yes	No	No/Unknown	Yes
＞3	≥40	Male	White	Married	Unknown	Unknown	Positive	Unknown	TX	N0	Yes	No	No	No	Yes	No/Unknown
≤3	≥40	Male	White	Widowed	51~100	Unknown	Positive	Unknown	TX	N1	No	No	Yes	No	No/Unknown	Yes
≤3	≥40	Male	White	Married	51~100	Grade III	Negative	Unknown	T3	N1	No	No	No	No	No/Unknown	No/Unknown
≤3	≥40	Male	White	Divorced	＞100	Grade II	Positive	Unknown	T3	N1	No	Yes	No	No	No/Unknown	No/Unknown
＞3	≥40	Female	White	Unmarried	51~100	Unknown	Unknown	Unknown	T1	N0	Yes	No	No	No	Yes	No/Unknown
＞3	≥40	Male	White	Unmarried	51~100	Grade II	Positive	Unknown	T3	N0	No	Yes	No	Local tumor destruction	No/Unknown	No/Unknown
≤3	≥40	Male	White	Divorced	Unknown	Unknown	Unknown	Unknown	TX	NX	Yes	No	Yes	No	No/Unknown	No/Unknown
≤3	≥40	Male	White	Separated	＞100	Unknown	Positive	Unknown	T3	N1	No	No	Yes	No	No/Unknown	No/Unknown
≤3	≥40	Male	White	Unmarried	21~50	Unknown	Negative	Unknown	T1	N1	No	No	No	No	No/Unknown	No/Unknown
≤3	≥40	Male	White	Widowed	Unknown	Grade III	Positive	Unknown	T3	N0	Yes	No	No	No	Yes	No/Unknown
≤3	≥40	Male	White	Married	＞100	Unknown	Negative	Ishak 5-6	T1	N0	No	No	No	No	No/Unknown	No/Unknown
＞3	≥40	Male	White	Unmarried	21~50	Unknown	Positive	Unknown	T2	N0	Yes	Yes	No	No	No/Unknown	No/Unknown
＞3	≥40	Male	White	Divorced	Unknown	Unknown	Positive	Unknown	TX	N0	Yes	No	No	No	Yes	Yes
≤3	≥40	Male	White	Married	Unknown	Unknown	Positive	Unknown	TX	N0	No	No	Yes	No	No/Unknown	No/Unknown
＞3	≥40	Male	White	Divorced	Unknown	Unknown	Unknown	Unknown	TX	NX	Unknown	Unknown	Unknown	No	No/Unknown	No/Unknown
≤3	≥40	Male	White	Divorced	21~50	Grade I	Negative	Unknown	T1	N0	Yes	Yes	No	No	Yes	No/Unknown
≤3	≥40	Male	Others	Married	51~100	Grade II	Positive	Unknown	T1	N0	No	No	Yes	No	No/Unknown	No/Unknown
＞3	≥40	Male	White	Married	51~100	Unknown	Positive	Unknown	T3	N0	Yes	No	Yes	No	Yes	Yes
≤3	≥40	Male	White	Married	＞100	Grade III	Negative	Unknown	T3	N1	No	No	Yes	No	No/Unknown	No/Unknown
≤3	≥40	Male	Black	Divorced	Unknown	Grade III	Positive	Unknown	T2	N1	Yes	No	No	No	No/Unknown	No/Unknown
≤3	≥40	Male	White	Married	Unknown	Grade II	Unknown	Unknown	TX	N0	Yes	No	No	No	No/Unknown	No/Unknown
≤3	≥40	Male	White	Married	Unknown	Grade II	Unknown	Unknown	T3	N0	No	No	Yes	No	No/Unknown	No/Unknown
＞3	≥40	Male	White	Married	51~100	Grade II	Positive	Unknown	T3	N0	Yes	No	No	No	No/Unknown	No/Unknown
≤3	≥40	Male	White	Unmarried	Unknown	Grade II	Positive	Unknown	TX	N0	Yes	No	No	No	No/Unknown	No/Unknown
≤3	≥40	Male	White	Unknown	＞100	Grade II	Positive	Unknown	T3	N0	No	No	No	No	No/Unknown	No/Unknown
＞3	＜40	Female	White	Separated	＞100	Grade III	Positive	Unknown	T1	N0	No	No	Yes	No	No/Unknown	No/Unknown
＞3	≥40	Male	White	Divorced	21~50	Unknown	Positive	Unknown	T2	N0	No	No	Yes	No	No/Unknown	Yes
≤3	≥40	Female	White	Unmarried	Unknown	Grade I	Unknown	Unknown	TX	N0	No	No	No	No	No/Unknown	No/Unknown
＞3	≥40	Male	White	Married	51~100	Grade I	Unknown	Ishak 0-4	T2	N0	No	No	Yes	No	No/Unknown	Yes
≤3	≥40	Male	White	Married	51~100	Unknown	Positive	Unknown	T3	N1	No	No	No	No	No/Unknown	No/Unknown
＞3	≥40	Male	White	Unmarried	51~100	Unknown	Unknown	Unknown	T1	N0	Yes	No	No	No	Yes	No/Unknown
＞3	≥40	Male	White	Unmarried	21~50	Unknown	Positive	Ishak 5-6	T2	N0	Yes	No	No	No	Yes	Yes
＞3	≥40	Male	White	Divorced	Unknown	Unknown	Positive	Unknown	TX	N0	Yes	No	No	No	Yes	Yes
≤3	≥40	Male	White	Married	Unknown	Grade I	Unknown	Unknown	TX	N1	No	Yes	Yes	No	No/Unknown	No/Unknown
＞3	≥40	Male	White	Married	51~100	Unknown	Unknown	Unknown	T1	N1	Yes	No	No	No	No/Unknown	No/Unknown
＞3	≥40	Male	White	Unknown	Unknown	Unknown	Unknown	Unknown	T4	NX	Unknown	Unknown	Unknown	Surgery,unknown	No/Unknown	Yes
＞3	≥40	Male	White	Unmarried	21~50	Unknown	Positive	Unknown	T2	N0	Yes	No	No	No	Yes	Yes
≤3	≥40	Male	White	Unmarried	51~100	Unknown	Positive	Ishak 5-6	T4	N1	No	No	No	No	No/Unknown	No/Unknown
＞3	≥40	Male	White	Married	51~100	Grade II	Unknown	Unknown	T3	N0	Yes	No	No	No	No/Unknown	Yes
＞3	≥40	Male	White	Married	51~100	Unknown	Positive	Ishak 5-6	T3	N0	Yes	No	No	No	No/Unknown	No/Unknown
≤3	≥40	Male	Others	Married	21~50	Unknown	Positive	Unknown	T2	NX	No	No	Yes	No	No/Unknown	No/Unknown
＞3	≥40	Male	White	Married	21~50	Unknown	Positive	Unknown	T1	N0	No	No	No	No	No/Unknown	Yes
≤3	≥40	Male	White	Unknown	51~100	Grade II	Negative	Unknown	T4	N0	No	No	No	No	No/Unknown	No/Unknown
≤3	≥40	Female	White	Unmarried	＞100	Grade II	Positive	Ishak 5-6	T3	N0	No	No	Yes	No	No/Unknown	No/Unknown
≤3	≥40	Male	White	Married	＞100	Unknown	Unknown	Unknown	T3	N0	No	No	No	No	No/Unknown	No/Unknown
≤3	≥40	Male	White	Unknown	＞100	Unknown	Positive	Unknown	TX	N0	Yes	No	No	No	No/Unknown	No/Unknown
＞3	≥40	Male	White	Unknown	Unknown	Unknown	Negative	Unknown	TX	NX	Yes	No	No	No	No/Unknown	Yes
≤3	≥40	Male	Others	Married	51~100	Grade II	Unknown	Unknown	T1	N0	Yes	No	No	No	Yes	No/Unknown
＞3	＜40	Female	White	Unknown	Unknown	Grade II	Negative	Unknown	TX	N0	No	No	Yes	No	No/Unknown	Yes
＞3	≥40	Male	White	Divorced	＞100	Unknown	Positive	Unknown	T3	N0	No	No	No	No	Yes	Yes
＞3	≥40	Male	White	Married	51~100	Unknown	Unknown	Unknown	T1	N0	Yes	No	No	No	Yes	Yes
＞3	≥40	Male	White	Married	＞100	Unknown	Positive	Unknown	T3	N0	No	No	No	No	No/Unknown	Yes
≤3	≥40	Male	White	Unmarried	Unknown	Unknown	Unknown	Unknown	TX	NX	Unknown	Unknown	Unknown	No	No/Unknown	No/Unknown
＞3	≥40	Male	White	Divorced	21~50	Unknown	Unknown	Unknown	TX	N0	No	No	No	No	No/Unknown	No/Unknown
＞3	≥40	Male	White	Married	Unknown	Grade I	Negative	Unknown	TX	N1	Yes	No	No	No	Yes	Yes
≤3	≥40	Female	White	Widowed	51~100	Unknown	Positive	Unknown	T3	N0	No	No	Yes	No	No/Unknown	No/Unknown
≤3	≥40	Male	White	Married	Unknown	Unknown	Positive	Unknown	TX	N0	Yes	No	No	No	Yes	Yes
＞3	≥40	Male	White	Married	51~100	Unknown	Positive	Ishak 5-6	T2	N0	No	No	No	No	No/Unknown	No/Unknown
≤3	≥40	Male	White	Widowed	51~100	Grade I	Negative	Unknown	T1	N0	Yes	No	No	No	Yes	No/Unknown
＞3	≥40	Male	White	Widowed	＞100	Unknown	Positive	Unknown	T3	N0	Yes	No	No	No	No/Unknown	No/Unknown
≤3	≥40	Male	White	Unknown	Unknown	Unknown	Negative	Unknown	T4	N1	No	No	Yes	No	No/Unknown	No/Unknown
≤3	≥40	Male	White	Divorced	21~50	Unknown	Positive	Unknown	T1	N0	Yes	Yes	No	No	No/Unknown	No/Unknown
≤3	≥40	Male	White	Divorced	Unknown	Unknown	Positive	Unknown	T1	N0	Yes	No	No	No	No/Unknown	No/Unknown
≤3	≥40	Male	White	Divorced	Unknown	Grade II	Unknown	Unknown	T2	N0	Yes	No	No	No	No/Unknown	Yes
＞3	≥40	Male	White	Widowed	51~100	Unknown	Unknown	Unknown	TX	N0	No	No	Yes	No	No/Unknown	No/Unknown
＞3	≥40	Male	White	Divorced	≤20	Unknown	Positive	Unknown	TX	N0	Yes	No	No	No	Yes	Yes
≤3	≥40	Male	White	Married	Unknown	Unknown	Positive	Unknown	TX	NX	Yes	No	No	No	No/Unknown	No/Unknown
≤3	≥40	Male	Others	Married	51~100	Unknown	Positive	Unknown	TX	N0	Yes	No	No	No	No/Unknown	No/Unknown
＞3	≥40	Male	White	Divorced	Unknown	Unknown	Positive	Unknown	TX	N0	No	No	Yes	No	No/Unknown	No/Unknown
＞3	≥40	Male	White	Widowed	Unknown	Unknown	Positive	Ishak 5-6	T3	N0	No	No	No	No	No/Unknown	Yes
≤3	≥40	Male	White	Unknown	Unknown	Unknown	Unknown	Unknown	TX	N0	Yes	No	No	No	Yes	No/Unknown
≤3	≥40	Female	White	Married	Unknown	Unknown	Unknown	Unknown	TX	NX	Unknown	Unknown	Unknown	No	No/Unknown	No/Unknown
≤3	≥40	Male	White	Divorced	51~100	Unknown	Positive	Unknown	T4	N1	No	No	Yes	No	No/Unknown	Yes
＞3	≥40	Female	White	Widowed	51~100	Unknown	Negative	Unknown	T4	N1	No	No	No	No	No/Unknown	Yes
＞3	≥40	Male	White	Married	Unknown	Unknown	Positive	Ishak 5-6	T1	N0	No	No	No	No	No/Unknown	Yes
＞3	≥40	Female	White	Married	51~100	Unknown	Negative	Unknown	T1	N0	No	No	Yes	No	Yes	No/Unknown
≤3	≥40	Male	White	Married	Unknown	Unknown	Positive	Unknown	TX	N0	No	No	Yes	No	No/Unknown	No/Unknown
≤3	≥40	Male	White	Married	51~100	Unknown	Positive	Unknown	T3	N0	No	No	Yes	No	No/Unknown	No/Unknown
＞3	≥40	Male	Others	Married	Unknown	Grade I	Unknown	Unknown	TX	NX	Yes	No	Yes	No	No/Unknown	Yes
＞3	≥40	Female	White	Unknown	51~100	Grade III	Positive	Unknown	T3	N0	Yes	No	No	No	No/Unknown	Yes
≤3	≥40	Male	White	Divorced	21~50	Unknown	Negative	Ishak 5-6	T1	NX	No	No	No	No	No/Unknown	No/Unknown
＞3	≥40	Male	White	Married	≤20	Unknown	Positive	Ishak 5-6	T2	N0	Yes	No	No	No	Yes	No/Unknown
＞3	≥40	Male	White	Married	21~50	Grade I	Unknown	Unknown	T1	N0	Yes	No	No	No	No/Unknown	Yes
≤3	≥40	Male	Others	Married	＞100	Grade II	Positive	Unknown	T3	N0	Yes	No	No	No	No/Unknown	No/Unknown
≤3	≥40	Female	White	Widowed	51~100	Unknown	Positive	Ishak 5-6	T3	NX	Yes	No	Unknown	No	No/Unknown	No/Unknown
＞3	≥40	Male	Others	Married	Unknown	Unknown	Positive	Ishak 5-6	TX	NX	Yes	No	No	No	Yes	No/Unknown
≤3	≥40	Male	White	Unmarried	＞100	Unknown	Positive	Ishak 5-6	T3	NX	Yes	No	No	No	Yes	Yes
＞3	＜40	Male	White	Married	21~50	Unknown	Unknown	Unknown	T1	N0	No	No	Yes	Wedge resection	No/Unknown	No/Unknown
≤3	≥40	Male	White	Married	21~50	Grade II	Negative	Ishak 0-4	T2	NX	No	No	Yes	No	No/Unknown	No/Unknown
＞3	≥40	Male	White	Separated	51~100	Grade II	Positive	Unknown	T1	NX	Yes	No	No	No	No/Unknown	Yes
＞3	≥40	Male	White	Married	21~50	Unknown	Negative	Ishak 0-4	T2	N0	No	No	No	No	No/Unknown	Yes
≤3	≥40	Male	White	Unmarried	＞100	Grade III	Positive	Unknown	TX	NX	No	No	Yes	No	No/Unknown	Yes
≤3	≥40	Male	Others	Married	51~100	Grade II	Unknown	Unknown	T3	N0	No	No	No	No	Yes	No/Unknown
＞3	≥40	Male	White	Unmarried	≤20	Unknown	Negative	Ishak 0-4	TX	NX	Unknown	Unknown	Unknown	No	No/Unknown	No/Unknown
≤3	≥40	Female	White	Married	＞100	Grade II	Negative	Unknown	T3	NX	Unknown	Unknown	Yes	No	No/Unknown	No/Unknown
＞3	≥40	Male	White	Married	＞100	Unknown	Negative	Unknown	T3	N0	No	No	Yes	No	No/Unknown	Yes
≤3	≥40	Male	White	Married	Unknown	Unknown	Negative	Unknown	T3	N1	No	No	Yes	No	No/Unknown	No/Unknown
≤3	≥40	Male	White	Married	51~100	Unknown	Unknown	Ishak 5-6	T1	N1	No	No	No	No	No/Unknown	No/Unknown
＞3	≥40	Female	White	Widowed	21~50	Grade I	Positive	Ishak 5-6	T2	N0	Yes	No	No	No	No/Unknown	Yes
≤3	≥40	Female	White	Married	Unknown	Grade III	Positive	Ishak 5-6	T3	NX	No	No	Yes	No	No/Unknown	No/Unknown
≤3	≥40	Male	White	Married	51~100	Unknown	Positive	Unknown	TX	NX	Unknown	Unknown	Yes	No	No/Unknown	Yes
≤3	≥40	Male	White	Married	51~100	Unknown	Positive	Unknown	T3	N1	Yes	No	No	No	Yes	Yes
＞3	≥40	Male	White	Widowed	21~50	Grade II	Unknown	Ishak 5-6	TX	NX	Yes	Yes	No	No	Yes	Yes
≤3	≥40	Female	White	Married	21~50	Unknown	Positive	Ishak 5-6	T4	N0	No	No	No	No	No/Unknown	No/Unknown
＞3	≥40	Male	White	Unmarried	Unknown	Unknown	Positive	Ishak 5-6	T3	N1	Yes	No	Yes	No	No/Unknown	No/Unknown
≤3	≥40	Female	Others	Widowed	51~100	Unknown	Positive	Unknown	T4	N0	No	No	Yes	No	No/Unknown	Yes
≤3	≥40	Male	White	Married	21~50	Unknown	Positive	Unknown	TX	NX	Unknown	Unknown	Yes	No	No/Unknown	No/Unknown
≤3	≥40	Male	White	Divorced	＞100	Grade II	Positive	Unknown	T3	N0	No	No	No	No	No/Unknown	No/Unknown
＞3	≥40	Female	White	Unknown	＞100	Unknown	Positive	Unknown	T2	N0	No	No	Yes	No	No/Unknown	Yes
≤3	≥40	Male	White	Unmarried	21~50	Unknown	Unknown	Unknown	T2	NX	No	Unknown	Unknown	No	No/Unknown	No/Unknown
≤3	≥40	Male	White	Married	＞100	Unknown	Positive	Unknown	T3	N0	No	No	Yes	No	No/Unknown	No/Unknown
≤3	≥40	Male	White	Divorced	51~100	Unknown	Positive	Unknown	T4	NX	No	No	Yes	No	Yes	Yes
≤3	≥40	Male	White	Widowed	Unknown	Unknown	Positive	Ishak 5-6	T2	N0	Yes	No	Yes	No	No/Unknown	Yes
＞3	≥40	Male	White	Married	21~50	Unknown	Positive	Ishak 5-6	T1	N0	No	No	Yes	No	No/Unknown	Yes
≤3	≥40	Male	White	Married	Unknown	Unknown	Negative	Unknown	TX	NX	No	No	No	No	No/Unknown	No/Unknown
＞3	＜40	Male	Black	Unmarried	＞100	Unknown	Positive	Ishak 5-6	T4	NX	No	No	Yes	No	No/Unknown	Yes
≤3	≥40	Male	White	Unmarried	Unknown	Grade III	Unknown	Ishak 5-6	TX	NX	Yes	No	Yes	No	No/Unknown	No/Unknown
≤3	≥40	Female	White	Divorced	51~100	Grade II	Positive	Unknown	T3	N1	No	No	No	No	No/Unknown	Yes
≤3	≥40	Male	White	Divorced	51~100	Grade III	Unknown	Unknown	T3	NX	No	No	No	No	No/Unknown	No/Unknown
＞3	≥40	Male	Black	Married	51~100	Unknown	Positive	Unknown	T1	N0	Yes	No	Yes	No	No/Unknown	Yes
≤3	≥40	Female	White	Unmarried	＞100	Unknown	Positive	Ishak 5-6	T3	N0	No	No	No	No	No/Unknown	No/Unknown
≤3	≥40	Male	White	Widowed	Unknown	Unknown	Positive	Ishak 5-6	T3	N0	Yes	No	No	No	Yes	No/Unknown
≤3	≥40	Male	Others	Married	≤20	Unknown	Positive	Ishak 5-6	T2	NX	Yes	No	No	No	No/Unknown	No/Unknown
≤3	≥40	Male	Others	Divorced	51~100	Unknown	Positive	Unknown	T3	NX	No	No	Yes	No	No/Unknown	No/Unknown
＞3	≥40	Male	Others	Married	51~100	Unknown	Positive	Unknown	T3	N0	No	No	Yes	No	No/Unknown	No/Unknown
＞3	≥40	Male	Others	Married	21~50	Unknown	Unknown	Ishak 5-6	T2	NX	No	No	No	No	No/Unknown	Yes
≤3	≥40	Male	White	Unmarried	51~100	Unknown	Positive	Ishak 5-6	T4	N0	No	No	Yes	No	No/Unknown	No/Unknown
≤3	≥40	Female	White	Married	Unknown	Grade III	Unknown	Unknown	TX	NX	Yes	No	No	No	Yes	No/Unknown
≤3	≥40	Female	White	Married	21~50	Unknown	Positive	Ishak 5-6	T2	N0	No	No	No	No	No/Unknown	No/Unknown
≤3	≥40	Male	White	Married	21~50	Grade II	Unknown	Ishak 5-6	T1	N0	No	No	No	No	No/Unknown	No/Unknown
＞3	≥40	Male	Others	Married	＞100	Grade III	Negative	Ishak 0-4	TX	N0	No	No	Yes	No	No/Unknown	Yes
≤3	≥40	Male	Black	Married	＞100	Unknown	Positive	Ishak 5-6	T3	N0	No	No	No	No	No/Unknown	No/Unknown
≤3	≥40	Male	Others	Unknown	51~100	Unknown	Positive	Unknown	T3	N1	No	No	No	No	No/Unknown	Yes
＞3	＜40	Male	White	Unmarried	Unknown	Unknown	Positive	Unknown	TX	NX	No	No	Yes	No	No/Unknown	Yes
≤3	≥40	Female	White	Unknown	Unknown	Unknown	Unknown	Unknown	TX	NX	Yes	Yes	Unknown	No	No/Unknown	No/Unknown
＞3	≥40	Male	White	Divorced	51~100	Unknown	Positive	Unknown	T3	N1	No	No	Unknown	No	No/Unknown	Yes
≤3	≥40	Male	White	Unknown	21~50	Unknown	Negative	Unknown	TX	NX	No	No	No	No	No/Unknown	Yes
＞3	≥40	Male	Black	Married	Unknown	Grade I	Unknown	Unknown	TX	N1	Yes	No	No	No	Yes	No/Unknown
＞3	≥40	Male	White	Married	Unknown	Unknown	Unknown	Ishak 5-6	T1	N0	Yes	No	No	No	Yes	Yes
≤3	≥40	Male	White	Divorced	＞100	Unknown	Unknown	Ishak 5-6	T3	NX	No	No	Yes	No	No/Unknown	No/Unknown
＞3	≥40	Male	Others	Married	21~50	Unknown	Unknown	Unknown	T1	N0	No	No	No	No	No/Unknown	Yes
≤3	≥40	Male	White	Married	21~50	Grade I	Unknown	Ishak 5-6	TX	NX	Yes	No	Yes	No	No/Unknown	No/Unknown
≤3	≥40	Male	Black	Unmarried	51~100	Unknown	Positive	Ishak 5-6	T1	N0	No	No	No	Local tumor destruction	No/Unknown	No/Unknown
＞3	≥40	Female	White	Unmarried	＞100	Grade III	Positive	Unknown	T3	N0	No	No	Yes	No	No/Unknown	Yes
≤3	≥40	Male	White	Separated	21~50	Unknown	Unknown	Unknown	T1	N1	No	No	No	No	No/Unknown	No/Unknown
≤3	≥40	Male	White	Widowed	51~100	Unknown	Positive	Ishak 5-6	T3	NX	No	No	No	No	No/Unknown	No/Unknown
＞3	≥40	Male	White	Married	51~100	Unknown	Positive	Unknown	T4	NX	Yes	No	No	No	No/Unknown	No/Unknown
≤3	≥40	Male	Others	Divorced	21~50	Unknown	Positive	Ishak 5-6	T3	NX	No	No	No	No	No/Unknown	No/Unknown
＞3	≥40	Female	White	Unmarried	51~100	Unknown	Negative	Unknown	T3	N0	No	No	Yes	No	No/Unknown	No/Unknown
＞3	≥40	Male	White	Married	51~100	Grade III	Negative	Unknown	T3	N1	No	No	Yes	No	No/Unknown	Yes
＞3	≥40	Male	Others	Married	＞100	Unknown	Positive	Ishak 5-6	T4	NX	No	No	Yes	No	No/Unknown	Yes
＞3	≥40	Female	Others	Married	＞100	Unknown	Positive	Ishak 5-6	T3	N0	Yes	No	No	No	Yes	Yes
≤3	≥40	Female	Others	Widowed	Unknown	Unknown	Unknown	Unknown	TX	N0	No	No	No	No	No/Unknown	No/Unknown
＞3	≥40	Male	Others	Married	51~100	Grade II	Unknown	Ishak 5-6	T1	N0	No	No	No	No	No/Unknown	Yes
≤3	≥40	Male	White	Unmarried	51~100	Unknown	Positive	Unknown	T3	N0	Yes	No	No	No	Yes	No/Unknown
＞3	≥40	Male	White	Married	＞100	Unknown	Positive	Ishak 5-6	T3	N1	No	No	No	No	No/Unknown	Yes
＞3	≥40	Male	White	Married	＞100	Grade II	Positive	Ishak 0-4	T3	N1	No	No	Yes	No	No/Unknown	Yes
≤3	≥40	Male	White	Married	＞100	Unknown	Negative	Unknown	T1	N0	Yes	No	No	No	Yes	No/Unknown
≤3	≥40	Male	Others	Unknown	51~100	Grade III	Unknown	Unknown	T3	N0	No	No	Yes	No	No/Unknown	Yes
≤3	≥40	Male	White	Unmarried	Unknown	Unknown	Positive	Ishak 5-6	TX	N0	No	No	Yes	No	No/Unknown	Yes
＞3	≥40	Male	White	Divorced	＞100	Grade II	Positive	Ishak 5-6	T3	N0	No	No	No	No	No/Unknown	No/Unknown
＞3	≥40	Male	White	Widowed	＞100	Grade II	Unknown	Unknown	T3	NX	No	No	No	No	No/Unknown	Yes
＞3	≥40	Male	White	Unmarried	＞100	Unknown	Positive	Ishak 5-6	T3	N0	No	No	No	No	No/Unknown	No/Unknown
≤3	≥40	Male	Others	Married	＞100	Unknown	Positive	Unknown	T3	N1	Yes	No	Yes	No	Yes	No/Unknown
≤3	≥40	Male	White	Unmarried	21~50	Unknown	Positive	Ishak 5-6	T1	NX	Yes	No	No	No	Yes	No/Unknown
≤3	≥40	Male	White	Unknown	＞100	Unknown	Negative	Ishak 5-6	T4	N1	Yes	No	No	No	No/Unknown	No/Unknown
＞3	≥40	Male	White	Unmarried	51~100	Unknown	Positive	Ishak 5-6	T3	N0	No	No	No	No	No/Unknown	No/Unknown
≤3	≥40	Male	White	Unmarried	Unknown	Unknown	Unknown	Unknown	TX	NX	Unknown	Unknown	Unknown	No	No/Unknown	No/Unknown
≤3	≥40	Male	White	Unmarried	51~100	Unknown	Positive	Ishak 5-6	T3	N1	No	No	Yes	No	No/Unknown	No/Unknown
≤3	≥40	Male	Black	Divorced	Unknown	Grade II	Positive	Ishak 5-6	TX	N1	Yes	No	Yes	No	No/Unknown	No/Unknown
＞3	≥40	Male	White	Divorced	21~50	Unknown	Unknown	Ishak 5-6	T2	N0	No	No	No	No	No/Unknown	Yes
＞3	≥40	Male	White	Divorced	51~100	Unknown	Positive	Ishak 5-6	T3	NX	No	No	Yes	No	No/Unknown	No/Unknown
≤3	≥40	Male	White	Married	＞100	Grade II	Unknown	Unknown	TX	NX	Yes	No	No	No	No/Unknown	No/Unknown
＞3	≥40	Male	White	Married	21~50	Grade II	Positive	Ishak 5-6	T1	NX	No	No	No	No	No/Unknown	No/Unknown
＞3	≥40	Male	Black	Divorced	＞100	Unknown	Positive	Unknown	T4	N1	No	No	No	No	No/Unknown	Yes
≤3	≥40	Male	White	Divorced	Unknown	Unknown	Unknown	Unknown	TX	NX	No	Yes	No	No	No/Unknown	No/Unknown
≤3	≥40	Male	Others	Unmarried	＞100	Grade II	Positive	Ishak 5-6	T3	N1	Yes	No	No	No	No/Unknown	No/Unknown
＞3	≥40	Male	White	Unmarried	Unknown	Unknown	Negative	Unknown	TX	N0	No	No	No	No	No/Unknown	Yes
≤3	≥40	Male	White	Divorced	21~50	Unknown	Unknown	Unknown	T2	N0	No	No	Yes	No	No/Unknown	Yes
≤3	≥40	Male	White	Married	Unknown	Unknown	Positive	Ishak 5-6	TX	NX	No	No	Yes	No	No/Unknown	No/Unknown
＞3	≥40	Male	White	Married	21~50	Unknown	Positive	Ishak 5-6	T3	N0	No	No	No	No	No/Unknown	Yes
≤3	≥40	Male	White	Unmarried	＞100	Unknown	Unknown	Ishak 5-6	T3	NX	Yes	No	No	No	Yes	Yes
＞3	≥40	Male	Black	Divorced	＞100	Unknown	Positive	Unknown	T3	N1	No	No	Yes	No	No/Unknown	No/Unknown
≤3	≥40	Male	Black	Divorced	＞100	Unknown	Positive	Unknown	T3	N1	Yes	No	Yes	No	No/Unknown	Yes
≤3	≥40	Male	Black	Married	＞100	Unknown	Positive	Ishak 5-6	T3	N1	No	No	Yes	No	No/Unknown	No/Unknown
≤3	≥40	Female	Black	Unknown	＞100	Unknown	Positive	Ishak 5-6	T3	N1	No	No	Yes	No	No/Unknown	No/Unknown
＞3	≥40	Male	White	Divorced	21~50	Unknown	Positive	Ishak 5-6	T1	N0	No	Yes	Yes	No	No/Unknown	No/Unknown
≤3	≥40	Male	Others	Married	51~100	Grade II	Positive	Ishak 5-6	T3	N0	No	No	No	No	No/Unknown	No/Unknown
＞3	≥40	Male	White	Separated	＞100	Unknown	Positive	Ishak 5-6	T3	N1	No	No	No	No	No/Unknown	Yes
＞3	≥40	Male	White	Married	51~100	Unknown	Negative	Unknown	T3	N1	No	No	No	No	Yes	No/Unknown
≤3	≥40	Male	White	Married	＞100	Unknown	Negative	Ishak 5-6	T3	NX	No	No	Yes	No	No/Unknown	No/Unknown
≤3	≥40	Female	White	Divorced	Unknown	Grade III	Unknown	Unknown	TX	NX	No	No	Yes	No	No/Unknown	No/Unknown
＞3	≥40	Male	White	Divorced	21~50	Unknown	Negative	Unknown	T1	N0	Yes	No	No	No	Yes	No/Unknown
＞3	≥40	Male	Others	Married	21~50	Unknown	Positive	Ishak 5-6	T3	N0	No	No	No	No	Yes	Yes
≤3	≥40	Male	White	Unknown	＞100	Grade III	Negative	Ishak 5-6	T1	N1	No	No	No	No	No/Unknown	No/Unknown
＞3	≥40	Female	White	Unknown	51~100	Unknown	Positive	Unknown	T4	N0	Yes	No	No	No	No/Unknown	No/Unknown
≤3	≥40	Male	White	Married	51~100	Unknown	Positive	Unknown	T3	N0	No	No	Unknown	No	No/Unknown	Yes
≤3	≥40	Male	White	Divorced	Unknown	Unknown	Positive	Ishak 5-6	T3	NX	No	No	Yes	No	No/Unknown	No/Unknown
≤3	≥40	Male	White	Married	＞100	Unknown	Positive	Ishak 5-6	T4	NX	No	No	Yes	No	No/Unknown	No/Unknown
＞3	≥40	Male	White	Unmarried	21~50	Unknown	Positive	Ishak 5-6	T3	NX	No	No	No	No	Yes	No/Unknown
＞3	＜40	Male	White	Unmarried	＞100	Grade II	Negative	Ishak 0-4	T3	N1	No	No	No	Lobectomy	No/Unknown	No/Unknown
＞3	≥40	Male	White	Married	51~100	Unknown	Positive	Ishak 5-6	T4	N1	No	No	No	No	No/Unknown	Yes
＞3	≥40	Male	White	Married	Unknown	Unknown	Negative	Ishak 5-6	TX	N1	Yes	Unknown	Unknown	No	Yes	Yes
≤3	≥40	Male	White	Unmarried	Unknown	Unknown	Positive	Ishak 5-6	TX	NX	Unknown	Unknown	Unknown	No	No/Unknown	No/Unknown
＞3	≥40	Male	White	Widowed	51~100	Grade I	Unknown	Unknown	TX	NX	Unknown	Unknown	Unknown	No	No/Unknown	Yes
＞3	≥40	Male	White	Divorced	21~50	Unknown	Positive	Unknown	T1	NX	Yes	No	No	No	Yes	No/Unknown
≤3	≥40	Male	White	Widowed	Unknown	Grade III	Positive	Unknown	TX	N1	No	No	Yes	No	No/Unknown	Yes
＞3	≥40	Male	White	Unmarried	Unknown	Unknown	Positive	Ishak 5-6	TX	NX	No	No	No	No	No/Unknown	Yes
＞3	≥40	Male	White	Married	51~100	Unknown	Positive	Unknown	T4	N0	No	No	No	No	No/Unknown	Yes
≤3	≥40	Male	Others	Married	＞100	Grade II	Positive	Unknown	T3	N0	Yes	No	No	No	Yes	Yes
＞3	≥40	Male	Others	Married	21~50	Unknown	Positive	Unknown	T2	NX	No	No	Yes	No	No/Unknown	Yes
＞3	≥40	Male	White	Married	51~100	Grade II	Positive	Unknown	T1	N0	No	No	Yes	No	Yes	Yes
≤3	≥40	Male	White	Married	51~100	Unknown	Positive	Unknown	T3	N0	No	No	Yes	No	No/Unknown	No/Unknown
≤3	≥40	Male	White	Unknown	Unknown	Unknown	Positive	Unknown	TX	N0	No	No	No	No	No/Unknown	No/Unknown
≤3	≥40	Female	White	Married	51~100	Unknown	Positive	Ishak 5-6	T3	NX	No	No	No	No	No/Unknown	No/Unknown
≤3	≥40	Male	White	Divorced	Unknown	Unknown	Positive	Unknown	T3	NX	No	No	Yes	No	No/Unknown	No/Unknown
≤3	≥40	Male	White	Unmarried	51~100	Unknown	Positive	Unknown	T3	N1	No	No	No	No	No/Unknown	Yes
≤3	≥40	Male	White	Married	Unknown	Grade II	Negative	Unknown	T4	NX	No	No	Yes	No	No/Unknown	No/Unknown
＞3	≥40	Male	Others	Unmarried	51~100	Unknown	Positive	Ishak 5-6	T3	N1	No	No	No	No	No/Unknown	Yes
＞3	≥40	Male	Others	Married	51~100	Unknown	Unknown	Ishak 5-6	T3	N0	Yes	No	No	No	Yes	No/Unknown
≤3	≥40	Male	White	Married	＞100	Grade II	Negative	Unknown	T4	N0	Yes	No	Unknown	No	No/Unknown	No/Unknown
≤3	≥40	Male	White	Unmarried	21~50	Unknown	Positive	Unknown	T2	N0	No	No	No	No	No/Unknown	No/Unknown
＞3	≥40	Male	White	Unknown	51~100	Grade III	Positive	Ishak 5-6	T3	N1	No	No	No	No	No/Unknown	Yes
≤3	≥40	Male	White	Married	Unknown	Unknown	Positive	Unknown	TX	N0	No	No	No	No	No/Unknown	No/Unknown
≤3	≥40	Female	White	Widowed	21~50	Unknown	Positive	Ishak 5-6	T3	N0	No	No	Yes	No	No/Unknown	No/Unknown
≤3	≥40	Male	White	Unmarried	Unknown	Unknown	Positive	Ishak 5-6	T3	N1	No	No	Yes	No	No/Unknown	No/Unknown
≤3	≥40	Male	White	Unmarried	＞100	Unknown	Positive	Unknown	T3	N0	Unknown	Unknown	No	No	No/Unknown	No/Unknown
≤3	≥40	Male	White	Divorced	Unknown	Unknown	Positive	Unknown	TX	NX	Yes	No	No	No	Yes	No/Unknown
≤3	≥40	Male	White	Separated	＞100	Unknown	Positive	Ishak 5-6	T3	N1	Yes	No	No	No	Yes	No/Unknown
＞3	≥40	Female	White	Unmarried	21~50	Grade II	Negative	Ishak 5-6	T1	N0	No	No	No	Lobectomy	No/Unknown	No/Unknown
≤3	≥40	Male	White	Widowed	＞100	Unknown	Positive	Unknown	T3	N0	Yes	No	No	No	No/Unknown	No/Unknown
≤3	≥40	Male	Others	Unmarried	51~100	Unknown	Positive	Unknown	T4	N0	No	No	Yes	No	No/Unknown	No/Unknown
≤3	≥40	Male	White	Unmarried	51~100	Unknown	Positive	Unknown	T3	N0	No	No	No	No	No/Unknown	No/Unknown
≤3	≥40	Male	White	Divorced	51~100	Unknown	Unknown	Unknown	T4	N1	No	No	No	No	No/Unknown	No/Unknown
≤3	≥40	Male	White	Married	Unknown	Grade III	Unknown	Unknown	TX	N1	No	No	No	No	No/Unknown	No/Unknown
≤3	≥40	Male	White	Married	51~100	Unknown	Unknown	Unknown	T3	N0	No	No	No	No	No/Unknown	No/Unknown
≤3	≥40	Male	White	Married	21~50	Grade I	Positive	Unknown	TX	N1	Unknown	Unknown	Unknown	No	No/Unknown	No/Unknown
≤3	≥40	Male	Black	Unknown	21~50	Unknown	Positive	Ishak 5-6	T3	N1	No	No	Yes	No	No/Unknown	No/Unknown
＞3	≥40	Male	Black	Married	＞100	Unknown	Positive	Unknown	T3	N0	No	No	Yes	No	No/Unknown	Yes
＞3	≥40	Male	White	Married	21~50	Grade I	Unknown	Unknown	T2	N0	Yes	No	No	No	Yes	Yes
≤3	≥40	Male	White	Divorced	Unknown	Unknown	Positive	Unknown	T1	N0	Yes	No	No	No	No/Unknown	No/Unknown
≤3	≥40	Male	White	Married	Unknown	Grade III	Unknown	Unknown	T4	N1	No	No	Yes	No	No/Unknown	No/Unknown
≤3	≥40	Male	White	Married	21~50	Unknown	Positive	Ishak 5-6	T3	N0	No	No	Yes	No	No/Unknown	Yes
＞3	≥40	Male	White	Unmarried	Unknown	Unknown	Unknown	Unknown	TX	N1	Yes	No	No	No	No/Unknown	Yes
≤3	≥40	Male	Others	Married	51~100	Grade I	Negative	Unknown	T3	N0	No	No	No	No	No/Unknown	No/Unknown
＞3	≥40	Male	White	Married	Unknown	Grade II	Positive	Ishak 5-6	TX	N0	Yes	No	No	No	No/Unknown	Yes
≤3	≥40	Male	White	Married	Unknown	Unknown	Unknown	Unknown	TX	NX	Unknown	Unknown	Yes	No	No/Unknown	No/Unknown
≤3	≥40	Male	White	Married	Unknown	Unknown	Unknown	Unknown	TX	NX	Unknown	Unknown	Yes	No	No/Unknown	No/Unknown
≤3	≥40	Female	Others	Married	21~50	Unknown	Positive	Unknown	T3	N0	Yes	No	No	No	No/Unknown	Yes
＞3	≥40	Male	White	Married	21~50	Unknown	Positive	Unknown	T2	N0	Yes	No	No	No	Yes	Yes
＞3	≥40	Male	Others	Married	51~100	Unknown	Positive	Unknown	T3	N1	No	No	No	No	No/Unknown	Yes
＞3	≥40	Female	White	Married	51~100	Unknown	Positive	Ishak 5-6	T3	NX	No	No	No	No	No/Unknown	Yes
＞3	≥40	Male	Others	Unmarried	＞100	Grade I	Positive	Unknown	T3	N0	No	No	No	No	No/Unknown	No/Unknown
≤3	≥40	Male	White	Divorced	Unknown	Unknown	Positive	Unknown	TX	N0	Yes	No	No	No	Yes	No/Unknown
≤3	≥40	Male	Others	Married	＞100	Unknown	Positive	Unknown	T3	N0	No	No	Yes	No	Yes	Yes
＞3	≥40	Male	Black	Married	＞100	Grade II	Negative	Ishak 5-6	T3	N1	No	No	No	No	No/Unknown	Yes
≤3	≥40	Female	Others	Widowed	21~50	Unknown	Negative	Unknown	T1	N1	No	No	No	No	No/Unknown	No/Unknown
≤3	≥40	Male	Others	Married	Unknown	Unknown	Positive	Unknown	T3	NX	Yes	No	No	No	No/Unknown	No/Unknown
＞3	≥40	Male	White	Widowed	Unknown	Unknown	Unknown	Ishak 5-6	T3	N0	No	No	No	No	No/Unknown	Yes
≤3	≥40	Female	White	Divorced	Unknown	Unknown	Unknown	Unknown	TX	N1	Yes	No	Yes	No	No/Unknown	No/Unknown
≤3	≥40	Male	White	Unmarried	21~50	Unknown	Positive	Unknown	T3	N0	No	No	Yes	No	No/Unknown	Yes
≤3	≥40	Male	Black	Married	Unknown	Grade III	Positive	Unknown	TX	NX	No	No	Yes	No	No/Unknown	No/Unknown
＞3	≥40	Male	White	Married	51~100	Unknown	Unknown	Unknown	T3	N1	No	No	No	No	No/Unknown	No/Unknown
≤3	≥40	Male	White	Married	21~50	Unknown	Positive	Ishak 5-6	T3	N0	Yes	No	Yes	No	Yes	No/Unknown
＞3	≥40	Male	Others	Unmarried	＞100	Unknown	Positive	Unknown	T3	N1	No	No	No	No	No/Unknown	Yes
≤3	≥40	Male	White	Unmarried	51~100	Unknown	Unknown	Unknown	TX	NX	Yes	No	No	No	No/Unknown	No/Unknown
＞3	≥40	Male	White	Married	51~100	Grade II	Negative	Unknown	T3	N0	Yes	No	No	No	Yes	Yes
≤3	≥40	Female	Others	Unknown	＞100	Unknown	Unknown	Unknown	T3	N1	No	No	Yes	No	No/Unknown	Yes
≤3	≥40	Male	White	Divorced	Unknown	Unknown	Negative	Unknown	TX	NX	Yes	No	Yes	No	No/Unknown	No/Unknown
＞3	≥40	Female	White	Married	51~100	Grade II	Positive	Unknown	T3	N0	Yes	Unknown	Unknown	No	No/Unknown	No/Unknown
≤3	≥40	Male	White	Married	21~50	Unknown	Negative	Unknown	T3	N1	Unknown	Unknown	Unknown	No	No/Unknown	No/Unknown
＞3	≥40	Male	White	Unmarried	51~100	Unknown	Positive	Unknown	T3	N1	No	No	No	No	No/Unknown	Yes
≤3	≥40	Male	Others	Married	＞100	Grade I	Positive	Ishak 5-6	T4	N0	No	No	No	No	No/Unknown	Yes
≤3	≥40	Male	White	Widowed	Unknown	Unknown	Negative	Unknown	TX	N0	Yes	No	No	No	No/Unknown	No/Unknown
≤3	≥40	Male	Black	Divorced	Unknown	Unknown	Positive	Unknown	TX	NX	Yes	No	Yes	No	Yes	No/Unknown
≤3	≥40	Female	White	Married	Unknown	Unknown	Unknown	Unknown	TX	NX	No	No	No	No	No/Unknown	No/Unknown
＞3	≥40	Male	White	Married	＞100	Grade II	Positive	Unknown	T3	N0	No	No	No	No	Yes	Yes
≤3	≥40	Male	White	Divorced	51~100	Unknown	Unknown	Unknown	T3	N1	No	Unknown	Yes	No	No/Unknown	No/Unknown
≤3	≥40	Male	Black	Married	＞100	Grade III	Positive	Unknown	T4	N1	No	No	No	No	No/Unknown	No/Unknown
≤3	≥40	Female	White	Married	21~50	Unknown	Negative	Unknown	TX	NX	No	No	Yes	No	No/Unknown	No/Unknown
≤3	≥40	Male	White	Unknown	21~50	Unknown	Unknown	Unknown	T2	NX	Yes	Unknown	No	No	No/Unknown	No/Unknown
≤3	≥40	Female	Others	Married	≤20	Unknown	Positive	Unknown	T1	N0	No	No	No	No	No/Unknown	No/Unknown
≤3	≥40	Female	White	Married	Unknown	Unknown	Unknown	Unknown	TX	NX	Yes	Yes	No	No	Yes	No/Unknown
＞3	≥40	Male	White	Unmarried	21~50	Unknown	Positive	Unknown	TX	NX	Yes	No	No	No	No/Unknown	Yes
≤3	≥40	Female	Black	Unmarried	＞100	Unknown	Unknown	Unknown	TX	N1	No	No	Unknown	No	No/Unknown	No/Unknown
＞3	≥40	Male	Others	Married	51~100	Unknown	Positive	Unknown	T3	N0	No	No	Yes	No	No/Unknown	Yes
≤3	≥40	Female	Others	Widowed	＞100	Unknown	Positive	Unknown	T3	N1	No	No	No	No	No/Unknown	Yes
＞3	≥40	Male	White	Married	51~100	Unknown	Negative	Unknown	T3	N0	Yes	No	No	No	No/Unknown	Yes
≤3	≥40	Male	White	Separated	51~100	Unknown	Positive	Unknown	T3	N0	Yes	No	No	No	No/Unknown	No/Unknown
≤3	≥40	Male	Black	Unmarried	51~100	Unknown	Positive	Unknown	TX	N1	Yes	No	Yes	No	No/Unknown	No/Unknown
≤3	≥40	Female	Others	Widowed	Unknown	Unknown	Positive	Unknown	T3	NX	No	No	No	No	No/Unknown	No/Unknown
≤3	≥40	Male	White	Unknown	21~50	Unknown	Unknown	Unknown	T3	N0	Unknown	No	No	No	No/Unknown	No/Unknown
≤3	≥40	Female	White	Unmarried	Unknown	Unknown	Unknown	Unknown	TX	NX	No	No	Yes	No	No/Unknown	No/Unknown
≤3	≥40	Male	Others	Separated	21~50	Unknown	Negative	Unknown	T3	NX	Yes	No	No	No	Yes	No/Unknown
≤3	≥40	Male	White	Married	21~50	Unknown	Positive	Unknown	T2	N0	No	No	No	No	No/Unknown	Yes
≤3	≥40	Male	White	Widowed	21~50	Unknown	Unknown	Unknown	T3	N1	Yes	No	No	No	No/Unknown	No/Unknown
≤3	≥40	Male	White	Divorced	51~100	Unknown	Positive	Unknown	T3	NX	Yes	No	No	No	No/Unknown	No/Unknown
≤3	≥40	Male	White	Married	Unknown	Unknown	Positive	Unknown	T4	N1	No	No	Yes	No	No/Unknown	Yes
＞3	≥40	Male	White	Married	51~100	Grade II	Positive	Unknown	T4	N1	No	No	Yes	No	No/Unknown	Yes
≤3	≥40	Female	White	Married	＞100	Unknown	Positive	Unknown	T1	N0	No	No	No	No	No/Unknown	Yes
≤3	≥40	Male	Others	Married	＞100	Unknown	Positive	Unknown	T3	N0	No	No	Yes	No	No/Unknown	No/Unknown
≤3	≥40	Male	White	Unknown	Unknown	Grade III	Positive	Unknown	T4	NX	No	No	No	No	No/Unknown	No/Unknown
≤3	≥40	Male	White	Unmarried	Unknown	Unknown	Positive	Unknown	T3	N0	No	No	Yes	No	No/Unknown	No/Unknown
＞3	≥40	Male	White	Unknown	51~100	Unknown	Positive	Unknown	T3	N0	No	No	No	No	No/Unknown	No/Unknown
≤3	≥40	Male	Others	Unmarried	Unknown	Unknown	Positive	Unknown	TX	N0	Unknown	Unknown	Unknown	No	No/Unknown	No/Unknown
≤3	≥40	Male	Others	Married	Unknown	Unknown	Positive	Unknown	TX	N0	No	No	Yes	No	No/Unknown	Yes
≤3	≥40	Male	Others	Unmarried	51~100	Unknown	Positive	Unknown	T3	N1	No	No	No	No	No/Unknown	No/Unknown
≤3	≥40	Male	White	Unmarried	Unknown	Unknown	Positive	Unknown	T4	N0	No	No	No	No	No/Unknown	No/Unknown
＞3	≥40	Male	White	Married	51~100	Grade II	Negative	Unknown	T3	N1	Yes	No	No	No	Yes	No/Unknown
＞3	≥40	Male	White	Divorced	＞100	Grade II	Positive	Unknown	T3	N1	No	No	No	No	No/Unknown	No/Unknown
＞3	≥40	Male	White	Widowed	51~100	Grade III	Unknown	Unknown	T3	N1	No	No	No	No	No/Unknown	Yes
＞3	≥40	Male	Others	Divorced	51~100	Unknown	Positive	Unknown	T1	N0	Yes	No	No	No	Yes	Yes
＞3	≥40	Male	White	Married	21~50	Grade II	Unknown	Unknown	T2	N0	Yes	No	No	No	Yes	Yes
≤3	≥40	Male	White	Married	21~50	Unknown	Positive	Unknown	T3	N0	Yes	No	No	No	No/Unknown	No/Unknown
≤3	≥40	Female	White	Unmarried	21~50	Unknown	Unknown	Unknown	T2	N0	Yes	No	No	No	Yes	No/Unknown
＞3	≥40	Female	Others	Divorced	Unknown	Unknown	Unknown	Unknown	TX	N0	Yes	No	No	No	Yes	No/Unknown
≤3	≥40	Male	White	Unknown	Unknown	Unknown	Positive	Unknown	T3	N1	No	No	No	No	No/Unknown	No/Unknown
≤3	≥40	Male	Others	Unknown	＞100	Unknown	Positive	Unknown	T4	NX	No	No	No	No	No/Unknown	No/Unknown
≤3	≥40	Male	White	Unmarried	＞100	Grade III	Positive	Unknown	T3	N1	No	No	No	No	No/Unknown	No/Unknown
≤3	≥40	Male	Black	Widowed	51~100	Unknown	Negative	Unknown	T3	N0	No	No	No	No	No/Unknown	No/Unknown
＞3	≥40	Male	Others	Married	51~100	Unknown	Positive	Unknown	T3	N1	No	No	No	No	No/Unknown	No/Unknown
≤3	≥40	Male	White	Divorced	Unknown	Unknown	Positive	Unknown	TX	N0	Yes	No	No	No	No/Unknown	No/Unknown
≤3	≥40	Male	Others	Married	Unknown	Unknown	Positive	Unknown	T4	N1	No	No	Yes	No	No/Unknown	No/Unknown
＞3	≥40	Female	Others	Married	≤20	Grade II	Negative	Unknown	T2	NX	Unknown	Unknown	No	No	No/Unknown	No/Unknown
≤3	≥40	Male	Others	Unmarried	＞100	Unknown	Unknown	Unknown	T3	NX	No	No	Yes	No	No/Unknown	No/Unknown
≤3	≥40	Male	Others	Unknown	＞100	Unknown	Unknown	Unknown	T3	N0	No	No	Yes	No	No/Unknown	No/Unknown
≤3	≥40	Male	White	Married	51~100	Grade III	Positive	Unknown	T3	N1	No	No	No	No	No/Unknown	No/Unknown
＞3	≥40	Male	White	Married	51~100	Unknown	Unknown	Unknown	T3	N1	No	No	No	No	No/Unknown	Yes
＞3	≥40	Female	White	Married	Unknown	Unknown	Positive	Ishak 0-4	T4	N0	Yes	No	Yes	No	Yes	Yes
≤3	≥40	Male	White	Married	＞100	Unknown	Positive	Unknown	T3	NX	No	No	Yes	No	No/Unknown	No/Unknown
≤3	≥40	Male	White	Married	Unknown	Unknown	Positive	Unknown	TX	NX	Yes	No	No	No	Yes	No/Unknown
≤3	≥40	Male	White	Unmarried	Unknown	Unknown	Positive	Ishak 5-6	TX	NX	No	No	Yes	No	No/Unknown	No/Unknown
≤3	≥40	Male	White	Married	51~100	Unknown	Positive	Unknown	T3	NX	Yes	No	Yes	No	Yes	Yes
≤3	≥40	Male	White	Unmarried	21~50	Unknown	Negative	Unknown	T2	N0	Unknown	No	Unknown	No	No/Unknown	No/Unknown
≤3	≥40	Male	White	Married	＞100	Unknown	Positive	Unknown	T3	NX	No	No	No	No	No/Unknown	No/Unknown
＞3	≥40	Male	White	Unmarried	51~100	Unknown	Positive	Unknown	T3	N1	Yes	No	No	No	Yes	Yes
≤3	≥40	Male	Others	Married	Unknown	Grade II	Positive	Unknown	TX	NX	Yes	Unknown	Yes	No	No/Unknown	No/Unknown
＞3	≥40	Male	White	Widowed	＞100	Unknown	Positive	Unknown	T3	N0	Yes	No	No	No	No/Unknown	No/Unknown
≤3	≥40	Male	White	Unmarried	＞100	Unknown	Positive	Unknown	T3	N0	Yes	No	No	No	No/Unknown	No/Unknown
＞3	≥40	Female	White	Married	21~50	Unknown	Negative	Ishak 5-6	T1	N0	Yes	No	No	No	No/Unknown	No/Unknown
＞3	≥40	Female	White	Widowed	＞100	Unknown	Unknown	Unknown	T3	N0	Yes	No	No	No	No/Unknown	No/Unknown
＞3	≥40	Female	Others	Unmarried	21~50	Grade II	Positive	Unknown	T2	N0	No	No	No	No	No/Unknown	Yes
＞3	≥40	Male	White	Divorced	21~50	Unknown	Positive	Unknown	T2	N1	No	No	Yes	No	No/Unknown	No/Unknown
＞3	≥40	Male	White	Married	＞100	Unknown	Positive	Unknown	T3	N1	No	Yes	Yes	No	No/Unknown	Yes
≤3	≥40	Male	White	Divorced	51~100	Unknown	Negative	Unknown	T3	N1	Yes	No	No	No	No/Unknown	No/Unknown
＞3	≥40	Male	White	Married	21~50	Unknown	Positive	Unknown	T1	N0	Yes	No	No	No	Yes	Yes
≤3	≥40	Female	White	Married	51~100	Unknown	Positive	Unknown	T3	N1	No	No	No	No	No/Unknown	No/Unknown
≤3	≥40	Male	White	Unmarried	＞100	Unknown	Unknown	Unknown	T3	N1	Unknown	Unknown	Unknown	No	No/Unknown	No/Unknown
＞3	≥40	Male	White	Separated	51~100	Unknown	Positive	Unknown	T3	N1	No	No	No	No	Yes	Yes
＞3	≥40	Male	White	Married	＞100	Grade II	Positive	Unknown	T1	N0	No	No	No	No	No/Unknown	Yes
≤3	≥40	Male	White	Married	Unknown	Grade I	Unknown	Unknown	T1	N0	No	No	No	No	No/Unknown	No/Unknown
≤3	≥40	Male	White	Married	Unknown	Grade III	Positive	Unknown	TX	N0	No	No	Yes	No	No/Unknown	No/Unknown
＞3	≥40	Male	White	Married	21~50	Unknown	Positive	Unknown	T3	NX	Yes	No	No	No	Yes	Yes
≤3	≥40	Female	White	Divorced	＞100	Grade III	Positive	Unknown	TX	NX	Yes	No	Yes	No	No/Unknown	No/Unknown
＞3	≥40	Male	White	Married	51~100	Grade I	Positive	Unknown	T3	N0	No	No	Yes	No	No/Unknown	Yes
＞3	≥40	Male	White	Unmarried	＞100	Grade I	Negative	Unknown	T4	N1	No	No	No	No	No/Unknown	No/Unknown
＞3	＜40	Female	White	Divorced	＞100	Grade III	Positive	Unknown	T3	N0	No	No	No	Wedge resection	Yes	Yes
＞3	≥40	Male	White	Unmarried	Unknown	Grade III	Positive	Unknown	T4	N0	No	No	No	No	No/Unknown	No/Unknown
≤3	≥40	Female	White	Married	＞100	Unknown	Positive	Ishak 5-6	T3	N1	Yes	No	No	No	Yes	No/Unknown
＞3	≥40	Male	White	Unmarried	Unknown	Unknown	Negative	Unknown	TX	N0	Yes	No	No	No	No/Unknown	Yes
＞3	≥40	Male	White	Married	＞100	Unknown	Positive	Unknown	T4	N1	No	No	Yes	No	No/Unknown	Yes
≤3	≥40	Male	Black	Unmarried	Unknown	Unknown	Unknown	Unknown	T3	N1	No	No	No	No	No/Unknown	No/Unknown
≤3	≥40	Male	Others	Married	51~100	Unknown	Positive	Unknown	TX	NX	No	No	Yes	No	No/Unknown	No/Unknown
≤3	≥40	Male	White	Unmarried	Unknown	Unknown	Positive	Unknown	T3	N0	Yes	No	No	No	No/Unknown	No/Unknown
＞3	＜40	Male	White	Unmarried	Unknown	Unknown	Negative	Unknown	TX	N0	No	No	Unknown	No	No/Unknown	Yes
≤3	≥40	Male	White	Unmarried	Unknown	Unknown	Unknown	Unknown	T3	NX	No	No	No	No	No/Unknown	No/Unknown
＞3	≥40	Male	White	Divorced	≤20	Unknown	Positive	Ishak 5-6	T2	N0	No	No	Yes	No	No/Unknown	No/Unknown
＞3	≥40	Female	Others	Widowed	Unknown	Grade III	Positive	Unknown	TX	NX	Yes	No	No	No	No/Unknown	No/Unknown
≤3	≥40	Male	White	Divorced	51~100	Unknown	Unknown	Unknown	T3	N0	No	No	Yes	No	No/Unknown	No/Unknown
≤3	≥40	Male	White	Married	51~100	Grade III	Positive	Unknown	T3	NX	Yes	No	Yes	No	No/Unknown	No/Unknown
≤3	≥40	Male	White	Married	51~100	Unknown	Negative	Unknown	T1	N0	No	No	No	No	No/Unknown	Yes
≤3	≥40	Male	White	Married	Unknown	Grade III	Positive	Unknown	TX	NX	No	No	No	No	No/Unknown	Yes
＞3	≥40	Male	White	Married	＞100	Unknown	Negative	Ishak 0-4	T1	N1	Yes	No	No	No	Yes	Yes
≤3	≥40	Male	White	Unknown	Unknown	Grade III	Unknown	Unknown	TX	NX	Unknown	Unknown	Unknown	No	No/Unknown	Yes
≤3	≥40	Male	White	Divorced	Unknown	Grade I	Negative	Unknown	T3	N1	Yes	No	No	No	No/Unknown	Yes
≤3	≥40	Male	White	Unknown	51~100	Unknown	Positive	Unknown	TX	N1	Yes	No	No	No	No/Unknown	No/Unknown
≤3	≥40	Male	White	Married	Unknown	Unknown	Positive	Unknown	T3	N0	No	No	Yes	No	No/Unknown	No/Unknown
＞3	≥40	Male	White	Married	21~50	Unknown	Negative	Unknown	T3	N1	No	No	No	No	No/Unknown	Yes
＞3	≥40	Male	White	Divorced	＞100	Grade I	Positive	Unknown	T3	N0	Yes	Unknown	Unknown	No	No/Unknown	Yes
＞3	≥40	Female	Others	Married	＞100	Unknown	Positive	Unknown	T3	N0	Yes	No	Yes	No	No/Unknown	Yes
≤3	≥40	Male	White	Married	Unknown	Unknown	Positive	Unknown	T2	N0	No	No	Yes	No	No/Unknown	No/Unknown
≤3	≥40	Male	White	Married	Unknown	Unknown	Positive	Unknown	TX	N0	Yes	No	Unknown	No	Yes	Yes
≤3	≥40	Male	White	Married	51~100	Unknown	Positive	Ishak 5-6	T3	NX	No	Unknown	Yes	No	No/Unknown	No/Unknown
＞3	＜40	Male	Others	Married	＞100	Unknown	Positive	Ishak 0-4	T3	N0	No	Unknown	Yes	No	No/Unknown	Yes
≤3	≥40	Male	White	Unmarried	＞100	Grade III	Positive	Ishak 5-6	T3	N0	Yes	No	Yes	No	No/Unknown	No/Unknown
≤3	≥40	Female	White	Divorced	Unknown	Unknown	Unknown	Unknown	T3	NX	No	No	Yes	No	No/Unknown	No/Unknown
＞3	≥40	Male	White	Unmarried	Unknown	Unknown	Unknown	Unknown	TX	NX	No	No	No	No	No/Unknown	No/Unknown
≤3	≥40	Male	White	Married	Unknown	Unknown	Unknown	Unknown	TX	NX	Yes	Yes	No	No	Yes	Yes
＞3	≥40	Male	White	Married	＞100	Grade III	Positive	Unknown	T2	N0	No	No	Yes	No	Yes	No/Unknown
≤3	≥40	Male	White	Divorced	51~100	Unknown	Positive	Unknown	T3	N0	Yes	No	No	No	No/Unknown	No/Unknown
＞3	≥40	Female	White	Unmarried	51~100	Unknown	Unknown	Unknown	T3	N0	No	No	Yes	No	No/Unknown	Yes
≤3	≥40	Male	Others	Widowed	Unknown	Unknown	Unknown	Unknown	TX	N0	No	No	No	No	No/Unknown	No/Unknown
≤3	≥40	Female	White	Widowed	Unknown	Unknown	Unknown	Unknown	TX	N0	No	No	No	No	No/Unknown	No/Unknown
＞3	≥40	Male	White	Married	Unknown	Grade II	Unknown	Unknown	TX	NX	No	No	No	No	No/Unknown	Yes
＞3	≥40	Female	White	Married	Unknown	Unknown	Negative	Unknown	TX	N1	No	No	No	No	No/Unknown	Yes
＞3	≥40	Male	White	Married	＞100	Grade III	Positive	Ishak 0-4	T3	N0	No	No	Yes	No	Yes	Yes
＞3	≥40	Male	White	Unmarried	21~50	Grade II	Positive	Ishak 5-6	T3	N1	No	No	No	No	No/Unknown	Yes
≤3	≥40	Male	Black	Widowed	Unknown	Grade I	Positive	Unknown	T4	N0	No	No	No	No	No/Unknown	No/Unknown
≤3	≥40	Male	White	Divorced	Unknown	Grade III	Positive	Unknown	TX	NX	No	No	Yes	No	No/Unknown	No/Unknown
≤3	≥40	Female	White	Married	Unknown	Grade III	Unknown	Unknown	TX	N0	No	No	No	No	No/Unknown	Yes
＞3	≥40	Male	White	Divorced	＞100	Grade III	Negative	Ishak 5-6	T3	N1	Yes	No	Yes	No	Yes	Yes
≤3	≥40	Male	White	Married	Unknown	Grade II	Unknown	Ishak 5-6	TX	N0	Yes	No	No	No	No/Unknown	No/Unknown
≤3	≥40	Male	White	Married	＞100	Grade III	Positive	Ishak 5-6	T3	NX	No	No	Yes	No	No/Unknown	Yes
≤3	≥40	Male	White	Married	21~50	Grade II	Positive	Unknown	T2	N1	No	No	No	No	No/Unknown	Yes
≤3	≥40	Male	White	Unmarried	51~100	Unknown	Positive	Ishak 5-6	T4	N1	No	No	Yes	No	No/Unknown	Yes
≤3	≥40	Male	Others	Married	＞100	Unknown	Positive	Unknown	T4	N0	No	No	Yes	No	No/Unknown	Yes
＞3	＜40	Male	White	Married	＞100	Unknown	Positive	Ishak 0-4	T2	N1	No	No	No	No	No/Unknown	Yes
≤3	≥40	Male	White	Divorced	51~100	Grade II	Unknown	Unknown	T3	N1	No	No	No	No	No/Unknown	No/Unknown
＞3	≥40	Male	White	Married	＞100	Grade I	Negative	Unknown	T3	N0	Yes	No	No	No	Yes	Yes
≤3	≥40	Male	White	Unmarried	51~100	Unknown	Positive	Unknown	T3	N1	No	No	Yes	No	No/Unknown	Yes
＞3	≥40	Male	Black	Married	51~100	Grade III	Unknown	Unknown	T4	N0	No	No	Yes	No	No/Unknown	No/Unknown
≤3	≥40	Male	White	Married	＞100	Unknown	Positive	Ishak 0-4	T4	NX	No	No	Yes	No	No/Unknown	Yes
≤3	≥40	Male	Others	Married	51~100	Grade III	Negative	Unknown	T3	NX	Yes	Unknown	Yes	No	No/Unknown	No/Unknown
＞3	≥40	Female	White	Married	51~100	Unknown	Negative	Unknown	T3	N1	Yes	No	Yes	No	No/Unknown	Yes
≤3	≥40	Male	White	Married	＞100	Unknown	Positive	Unknown	T4	N1	No	No	No	No	No/Unknown	Yes
≤3	≥40	Male	Others	Divorced	51~100	Unknown	Positive	Unknown	T1	N0	No	No	Yes	No	No/Unknown	No/Unknown
＞3	≥40	Male	White	Married	Unknown	Unknown	Negative	Unknown	T1	N0	No	No	No	No	No/Unknown	Yes
＞3	≥40	Male	White	Divorced	Unknown	Unknown	Positive	Ishak 5-6	TX	NX	No	No	Yes	No	No/Unknown	No/Unknown
≤3	＜40	Male	White	Unmarried	51~100	Grade III	Negative	Unknown	T3	N0	No	No	No	No	No/Unknown	No/Unknown
≤3	≥40	Male	White	Married	51~100	Unknown	Positive	Unknown	T3	N1	No	No	No	No	No/Unknown	No/Unknown
＞3	≥40	Male	White	Married	51~100	Unknown	Positive	Ishak 5-6	T3	N0	Yes	No	No	No	Yes	No/Unknown
≤3	≥40	Male	Others	Married	Unknown	Unknown	Unknown	Unknown	TX	NX	Unknown	Unknown	Yes	No	No/Unknown	No/Unknown
＞3	≥40	Male	White	Divorced	＞100	Unknown	Unknown	Unknown	T4	N0	Yes	No	No	No	Yes	No/Unknown
＞3	≥40	Female	White	Unknown	51~100	Unknown	Positive	Unknown	T3	N0	No	No	No	No	No/Unknown	Yes
≤3	≥40	Male	White	Married	Unknown	Unknown	Positive	Unknown	T1	NX	No	No	No	No	No/Unknown	No/Unknown
≤3	≥40	Male	Black	Married	21~50	Grade III	Positive	Ishak 5-6	T2	N0	No	No	Yes	No	No/Unknown	Yes
＞3	≥40	Male	White	Married	Unknown	Unknown	Unknown	Unknown	TX	NX	Yes	No	No	No	Yes	Yes
＞3	≥40	Male	White	Married	Unknown	Unknown	Positive	Unknown	T1	N0	No	No	No	No	No/Unknown	Yes
＞3	≥40	Male	White	Married	51~100	Grade II	Positive	Unknown	T3	N1	Yes	No	No	No	No/Unknown	Yes
≤3	≥40	Male	White	Married	Unknown	Unknown	Unknown	Ishak 5-6	TX	NX	No	No	No	No	No/Unknown	Yes
≤3	＜40	Male	Black	Unmarried	Unknown	Unknown	Positive	Unknown	TX	NX	No	No	Yes	No	No/Unknown	No/Unknown
＞3	≥40	Female	Black	Married	＞100	Grade I	Positive	Unknown	T3	N0	Yes	No	No	No	No/Unknown	Yes
＞3	≥40	Male	Others	Married	51~100	Unknown	Positive	Unknown	T3	N0	No	No	Yes	No	No/Unknown	Yes
≤3	≥40	Male	Others	Widowed	＞100	Unknown	Negative	Unknown	T1	N0	No	No	Yes	No	No/Unknown	No/Unknown
≤3	≥40	Male	White	Married	51~100	Unknown	Positive	Unknown	T3	N1	Yes	No	No	No	Yes	No/Unknown
＞3	≥40	Female	Black	Widowed	51~100	Unknown	Positive	Ishak 5-6	T3	N0	No	No	Yes	No	No/Unknown	No/Unknown
＞3	≥40	Male	White	Unmarried	＞100	Unknown	Positive	Unknown	T3	N0	No	No	Yes	No	No/Unknown	No/Unknown
≤3	≥40	Male	Black	Unmarried	Unknown	Unknown	Positive	Unknown	T4	NX	Yes	No	No	No	No/Unknown	No/Unknown
≤3	≥40	Male	Black	Married	51~100	Grade II	Negative	Ishak 5-6	T3	N0	No	No	No	No	No/Unknown	Yes
≤3	≥40	Male	Others	Married	Unknown	Unknown	Positive	Unknown	TX	N0	No	No	Yes	No	No/Unknown	No/Unknown
≤3	≥40	Male	White	Married	51~100	Grade IV	Negative	Unknown	T1	NX	No	No	Yes	No	No/Unknown	No/Unknown
＞3	≥40	Male	Black	Married	≤20	Grade I	Negative	Ishak 5-6	T1	N0	No	No	No	No	No/Unknown	No/Unknown
＞3	≥40	Male	White	Separated	51~100	Unknown	Positive	Ishak 5-6	T4	N0	No	No	No	No	No/Unknown	Yes
≤3	＜40	Female	White	Unmarried	＞100	Grade II	Positive	Unknown	T3	N0	No	No	Yes	No	No/Unknown	Yes
＞3	≥40	Male	Black	Divorced	51~100	Unknown	Positive	Unknown	T1	N0	No	No	No	No	No/Unknown	No/Unknown
≤3	≥40	Male	Others	Married	51~100	Grade III	Positive	Unknown	T3	N1	No	No	No	No	No/Unknown	No/Unknown
≤3	≥40	Female	Others	Widowed	＞100	Unknown	Positive	Unknown	T1	N0	No	No	No	No	No/Unknown	No/Unknown
≤3	≥40	Male	White	Unmarried	51~100	Unknown	Positive	Unknown	TX	N0	No	No	No	No	No/Unknown	No/Unknown
≤3	≥40	Male	White	Married	51~100	Grade III	Unknown	Unknown	T1	N0	No	No	No	No	No/Unknown	Yes
＞3	≥40	Male	White	Unmarried	21~50	Unknown	Positive	Unknown	T2	N1	No	No	No	No	No/Unknown	Yes
≤3	≥40	Male	White	Married	21~50	Grade I	Positive	Unknown	T2	N0	Yes	No	No	No	No/Unknown	No/Unknown
＞3	＜40	Male	Others	Unknown	≤20	Unknown	Positive	Unknown	T2	N0	No	No	No	No	No/Unknown	Yes
≤3	≥40	Female	White	Unmarried	Unknown	Unknown	Positive	Unknown	TX	N0	No	No	No	No	No/Unknown	No/Unknown
≤3	≥40	Male	Black	Unknown	＞100	Unknown	Positive	Unknown	T1	N0	No	No	No	No	No/Unknown	Yes
＞3	＜40	Male	Black	Unmarried	Unknown	Unknown	Positive	Unknown	T3	N0	No	No	Yes	No	No/Unknown	No/Unknown
＞3	≥40	Female	White	Married	＞100	Unknown	Unknown	Unknown	T3	N1	Yes	No	No	Lobectomy	No/Unknown	No/Unknown
＞3	≥40	Male	White	Married	＞100	Unknown	Positive	Ishak 0-4	T3	N0	No	No	No	No	No/Unknown	Yes
＞3	≥40	Male	Black	Married	≤20	Grade II	Positive	Unknown	T2	N0	No	No	Yes	No	No/Unknown	Yes
＞3	≥40	Male	White	Married	21~50	Unknown	Positive	Unknown	T3	N0	Yes	No	No	No	Yes	Yes
≤3	＜40	Male	Black	Unmarried	51~100	Grade III	Unknown	Unknown	T4	N0	No	No	Yes	No	No/Unknown	Yes
＞3	≥40	Male	Black	Separated	＞100	Grade II	Positive	Ishak 0-4	T3	NX	No	No	Yes	No	No/Unknown	Yes
≤3	≥40	Male	Others	Married	＞100	Grade I	Positive	Unknown	T3	N0	Yes	No	Yes	No	No/Unknown	Yes
≤3	≥40	Male	White	Married	51~100	Unknown	Positive	Unknown	T3	N0	Yes	No	No	No	No/Unknown	No/Unknown
＞3	≥40	Male	Black	Married	51~100	Unknown	Positive	Unknown	T3	N1	No	No	Yes	No	No/Unknown	Yes
≤3	≥40	Female	White	Married	Unknown	Unknown	Positive	Unknown	TX	N0	Yes	No	No	No	No/Unknown	No/Unknown
≤3	≥40	Male	Black	Unmarried	51~100	Unknown	Positive	Unknown	T3	N0	Yes	No	No	No	No/Unknown	No/Unknown
≤3	≥40	Male	White	Married	51~100	Unknown	Positive	Unknown	T3	N0	Yes	No	No	No	No/Unknown	No/Unknown
≤3	≥40	Female	Black	Married	Unknown	Grade II	Positive	Unknown	TX	N0	No	No	No	No	Yes	Yes
＞3	≥40	Male	Black	Unmarried	Unknown	Unknown	Positive	Unknown	T1	N0	Yes	No	Yes	No	No/Unknown	No/Unknown
≤3	≥40	Male	Black	Unmarried	51~100	Unknown	Positive	Unknown	T3	N0	No	No	Yes	No	No/Unknown	No/Unknown
≤3	≥40	Male	Black	Unmarried	Unknown	Unknown	Unknown	Unknown	TX	N0	No	No	Yes	No	No/Unknown	No/Unknown
＞3	≥40	Male	White	Unmarried	21~50	Unknown	Positive	Unknown	T2	N1	No	No	Yes	No	No/Unknown	Yes
≤3	≥40	Male	Black	Unmarried	51~100	Grade III	Positive	Unknown	T3	N0	No	No	Yes	No	No/Unknown	No/Unknown
≤3	≥40	Male	Black	Unmarried	Unknown	Unknown	Negative	Unknown	T3	N0	Yes	No	No	No	No/Unknown	Yes
≤3	≥40	Male	Black	Married	Unknown	Unknown	Positive	Ishak 5-6	TX	N0	No	No	Yes	No	No/Unknown	No/Unknown
≤3	≥40	Male	White	Divorced	51~100	Unknown	Unknown	Unknown	T3	N0	No	No	No	No	No/Unknown	No/Unknown
＞3	≥40	Male	White	Divorced	Unknown	Unknown	Positive	Ishak 5-6	T2	N0	No	No	No	No	No/Unknown	Yes
≤3	≥40	Male	White	Separated	51~100	Grade III	Positive	Ishak 5-6	T1	N0	No	No	No	No	No/Unknown	No/Unknown
＞3	≥40	Male	White	Married	＞100	Grade III	Unknown	Unknown	T3	N1	Unknown	Yes	Yes	No	Yes	No/Unknown
≤3	≥40	Male	Black	Unmarried	21~50	Grade II	Unknown	Unknown	T3	N0	No	No	Yes	No	No/Unknown	No/Unknown
≤3	≥40	Male	Others	Married	＞100	Grade III	Positive	Ishak 0-4	T3	N0	Yes	No	Yes	No	No/Unknown	Yes
＞3	≥40	Male	Black	Unknown	Unknown	Grade II	Positive	Ishak 0-4	TX	NX	Yes	No	No	No	No/Unknown	No/Unknown
＞3	≥40	Male	Black	Unmarried	＞100	Unknown	Positive	Unknown	T3	N0	No	No	Yes	No	No/Unknown	Yes
≤3	≥40	Male	Black	Unmarried	Unknown	Unknown	Positive	Unknown	TX	N0	No	No	Yes	No	No/Unknown	No/Unknown
≤3	≥40	Female	White	Married	＞100	Grade I	Unknown	Unknown	T3	N0	No	No	No	No	No/Unknown	No/Unknown
≤3	≥40	Male	Black	Widowed	51~100	Unknown	Positive	Unknown	T3	N0	Yes	No	No	No	No/Unknown	No/Unknown
≤3	≥40	Female	Black	Unmarried	51~100	Grade III	Positive	Ishak 5-6	T3	N0	No	No	No	No	No/Unknown	No/Unknown
≤3	≥40	Male	Black	Married	＞100	Unknown	Positive	Unknown	T3	N1	Yes	No	No	No	Yes	No/Unknown
＞3	＜40	Female	Black	Unmarried	Unknown	Unknown	Unknown	Unknown	T4	N1	No	No	Yes	No	Yes	No/Unknown
＞3	≥40	Male	White	Married	21~50	Unknown	Unknown	Unknown	T1	N0	Yes	No	No	No	No/Unknown	No/Unknown
≤3	≥40	Male	Black	Divorced	51~100	Unknown	Positive	Unknown	T3	N0	No	No	No	No	No/Unknown	No/Unknown
≤3	≥40	Male	Black	Married	≤20	Unknown	Unknown	Unknown	T1	NX	No	No	Yes	No	No/Unknown	No/Unknown
＞3	≥40	Male	White	Married	Unknown	Unknown	Positive	Unknown	TX	N1	Yes	No	No	No	No/Unknown	No/Unknown
≤3	≥40	Female	White	Widowed	51~100	Unknown	Positive	Unknown	T3	N0	No	No	No	No	No/Unknown	No/Unknown
＞3	≥40	Male	Black	Unmarried	＞100	Grade III	Positive	Unknown	T3	N0	Yes	No	No	No	No/Unknown	No/Unknown
≤3	≥40	Male	White	Married	＞100	Grade I	Positive	Unknown	T1	N0	No	No	No	No	No/Unknown	No/Unknown
≤3	≥40	Male	Black	Married	Unknown	Unknown	Unknown	Unknown	T4	N0	Yes	No	Yes	No	No/Unknown	Yes
≤3	≥40	Male	Black	Married	Unknown	Unknown	Positive	Unknown	T1	N1	Yes	No	Yes	No	No/Unknown	No/Unknown
≤3	≥40	Female	Black	Unmarried	＞100	Unknown	Negative	Ishak 5-6	T3	N0	No	No	No	No	No/Unknown	No/Unknown
＞3	≥40	Male	White	Married	21~50	Grade I	Positive	Unknown	T4	N1	No	No	No	No	No/Unknown	Yes
≤3	≥40	Male	Black	Unmarried	51~100	Unknown	Positive	Unknown	T3	N1	No	No	Yes	No	No/Unknown	No/Unknown
＞3	≥40	Female	White	Married	＞100	Unknown	Unknown	Unknown	T3	N1	No	No	No	No	No/Unknown	No/Unknown
≤3	≥40	Female	Black	Married	51~100	Unknown	Positive	Unknown	T3	N0	No	No	Yes	No	No/Unknown	No/Unknown
≤3	≥40	Male	White	Married	Unknown	Unknown	Positive	Unknown	T3	N0	No	No	No	No	Yes	No/Unknown
＞3	≥40	Male	White	Married	51~100	Grade I	Positive	Unknown	T3	N0	No	No	No	No	No/Unknown	Yes
＞3	≥40	Female	White	Divorced	21~50	Unknown	Unknown	Unknown	T2	N0	No	Yes	Yes	No	Yes	Yes
≤3	≥40	Male	White	Married	21~50	Grade III	Positive	Unknown	T1	N0	No	No	No	No	No/Unknown	No/Unknown
≤3	≥40	Male	Black	Separated	＞100	Unknown	Positive	Unknown	T3	N1	No	No	Yes	No	No/Unknown	Yes
＞3	≥40	Male	Others	Married	Unknown	Grade III	Positive	Unknown	T3	N1	No	No	No	No	No/Unknown	Yes
≤3	≥40	Female	White	Married	51~100	Unknown	Positive	Unknown	T2	N0	No	No	No	No	No/Unknown	No/Unknown
≤3	≥40	Male	Others	Married	Unknown	Unknown	Positive	Unknown	T3	N0	No	No	Yes	No	No/Unknown	Yes
≤3	≥40	Male	White	Married	51~100	Unknown	Unknown	Unknown	T3	N0	No	No	Yes	No	No/Unknown	No/Unknown
≤3	≥40	Male	Black	Married	21~50	Unknown	Positive	Unknown	T2	N0	Yes	No	Yes	No	No/Unknown	No/Unknown
≤3	≥40	Male	White	Married	Unknown	Unknown	Positive	Unknown	TX	N0	No	No	No	No	No/Unknown	No/Unknown
≤3	≥40	Male	White	Divorced	≤20	Unknown	Positive	Unknown	T1	N0	Yes	Yes	No	No	Yes	No/Unknown
≤3	≥40	Male	Others	Divorced	＞100	Unknown	Positive	Unknown	T2	N0	Yes	Unknown	Yes	No	No/Unknown	No/Unknown
≤3	≥40	Male	White	Divorced	Unknown	Unknown	Unknown	Unknown	TX	NX	Yes	No	No	No	Yes	No/Unknown
＞3	≥40	Male	Black	Divorced	≤20	Unknown	Positive	Ishak 5-6	T2	N0	No	No	Unknown	No	No/Unknown	Yes
≤3	≥40	Male	White	Married	51~100	Unknown	Positive	Unknown	T3	N0	No	Yes	Yes	No	No/Unknown	Yes
≤3	≥40	Male	Black	Unmarried	＞100	Unknown	Positive	Unknown	T3	N1	No	No	Yes	No	No/Unknown	No/Unknown
≤3	≥40	Female	Others	Married	51~100	Unknown	Unknown	Unknown	T1	N0	Yes	No	Yes	No	No/Unknown	No/Unknown
≤3	≥40	Male	Others	Married	＞100	Unknown	Positive	Unknown	T1	N0	No	No	Unknown	No	No/Unknown	No/Unknown
＞3	≥40	Female	Black	Divorced	Unknown	Unknown	Positive	Ishak 5-6	T4	N1	No	No	Yes	No	No/Unknown	Yes
≤3	≥40	Male	White	Married	51~100	Unknown	Negative	Unknown	T3	NX	No	No	No	No	No/Unknown	No/Unknown
≤3	≥40	Male	Others	Unknown	51~100	Grade III	Positive	Unknown	T3	N1	Yes	No	Yes	No	No/Unknown	Yes
＞3	≥40	Male	White	Unmarried	Unknown	Grade III	Positive	Ishak 5-6	T3	N1	No	No	No	No	No/Unknown	Yes
≤3	≥40	Male	Black	Unmarried	Unknown	Grade III	Unknown	Unknown	TX	NX	No	No	Yes	No	No/Unknown	No/Unknown
≤3	≥40	Male	White	Separated	＞100	Unknown	Unknown	Unknown	T4	N0	No	No	Yes	No	No/Unknown	No/Unknown
≤3	≥40	Male	White	Unmarried	51~100	Unknown	Positive	Unknown	T3	N0	No	No	Yes	No	No/Unknown	No/Unknown
＞3	≥40	Male	White	Married	Unknown	Grade I	Positive	Unknown	T3	N0	Yes	No	No	No	Yes	Yes
≤3	≥40	Male	White	Widowed	Unknown	Grade III	Positive	Unknown	TX	NX	Yes	No	Yes	No	No/Unknown	Yes
≤3	≥40	Male	Black	Unmarried	51~100	Unknown	Positive	Unknown	T1	N0	Yes	No	No	No	No/Unknown	No/Unknown
＞3	≥40	Female	Black	Divorced	＞100	Unknown	Unknown	Unknown	T3	N0	No	No	No	No	No/Unknown	Yes
≤3	≥40	Female	White	Unmarried	Unknown	Unknown	Negative	Ishak 0-4	TX	N0	No	No	No	No	No/Unknown	No/Unknown
≤3	≥40	Male	Others	Unknown	21~50	Unknown	Positive	Unknown	T3	N0	No	No	Yes	No	No/Unknown	No/Unknown
＞3	≥40	Male	Black	Married	51~100	Grade II	Unknown	Unknown	T3	N1	No	No	No	No	Yes	Yes
≤3	≥40	Male	Black	Married	51~100	Unknown	Positive	Unknown	T3	N0	No	No	Yes	No	No/Unknown	Yes
＞3	≥40	Male	Black	Married	＞100	Unknown	Positive	Ishak 0-4	T3	N0	No	No	No	Local tumor destruction	No/Unknown	Yes
＞3	≥40	Male	White	Married	51~100	Unknown	Negative	Unknown	T3	N0	Yes	No	No	No	Yes	No/Unknown
＞3	≥40	Male	Black	Unmarried	Unknown	Unknown	Positive	Unknown	T1	N0	No	No	No	No	No/Unknown	Yes
≤3	≥40	Male	Others	Unmarried	51~100	Grade III	Unknown	Unknown	T1	N1	No	No	No	No	No/Unknown	No/Unknown
＞3	≥40	Male	White	Unmarried	21~50	Unknown	Positive	Unknown	TX	N0	Yes	No	No	No	Yes	No/Unknown
＞3	≥40	Male	White	Divorced	＞100	Unknown	Positive	Ishak 5-6	T3	N1	No	No	No	No	Yes	No/Unknown
≤3	≥40	Male	Black	Divorced	51~100	Grade II	Positive	Unknown	TX	N0	No	No	Yes	No	No/Unknown	No/Unknown
＞3	≥40	Male	Black	Unmarried	Unknown	Unknown	Positive	Unknown	T2	N0	Yes	No	No	No	Yes	Yes
≤3	≥40	Male	Black	Unmarried	＞100	Unknown	Positive	Unknown	T1	N0	No	No	No	No	No/Unknown	No/Unknown
≤3	≥40	Male	White	Unmarried	51~100	Unknown	Unknown	Unknown	T1	N0	No	No	No	No	No/Unknown	No/Unknown
≤3	≥40	Male	Others	Unmarried	Unknown	Unknown	Positive	Unknown	T1	N0	No	No	Yes	No	No/Unknown	No/Unknown
≤3	≥40	Male	Black	Divorced	21~50	Unknown	Positive	Unknown	T2	N1	No	No	No	No	No/Unknown	No/Unknown
≤3	≥40	Male	White	Widowed	Unknown	Grade I	Unknown	Unknown	T2	N0	Yes	No	No	No	No/Unknown	No/Unknown
≤3	≥40	Male	Black	Married	＞100	Unknown	Positive	Unknown	T3	N0	No	No	Yes	No	No/Unknown	No/Unknown
≤3	≥40	Male	Black	Unmarried	Unknown	Grade II	Positive	Ishak 5-6	TX	N0	No	Yes	Yes	No	No/Unknown	Yes
＞3	＜40	Female	White	Unmarried	21~50	Unknown	Positive	Unknown	T1	N0	Yes	No	No	No	No/Unknown	No/Unknown
＞3	≥40	Male	White	Unmarried	＞100	Unknown	Positive	Unknown	T4	N0	Unknown	No	Yes	No	Yes	Yes
＞3	≥40	Male	Others	Married	＞100	Unknown	Positive	Unknown	T3	N0	Yes	No	No	No	Yes	No/Unknown
＞3	≥40	Male	Black	Divorced	51~100	Grade II	Unknown	Unknown	T3	N0	No	No	Yes	No	Yes	Yes
≤3	≥40	Male	White	Married	Unknown	Grade III	Positive	Unknown	T3	N1	No	No	Yes	No	No/Unknown	No/Unknown
≤3	≥40	Male	Black	Unmarried	＞100	Unknown	Positive	Unknown	T3	NX	No	No	No	No	No/Unknown	No/Unknown
＞3	≥40	Male	Black	Unmarried	Unknown	Unknown	Positive	Unknown	TX	N1	No	No	No	No	No/Unknown	Yes
≤3	≥40	Male	White	Unmarried	＞100	Unknown	Unknown	Unknown	T3	N0	No	No	Yes	No	No/Unknown	No/Unknown
≤3	≥40	Male	White	Unmarried	Unknown	Unknown	Positive	Unknown	T1	N0	Yes	No	Yes	No	No/Unknown	No/Unknown
≤3	≥40	Male	Others	Married	＞100	Unknown	Positive	Unknown	T3	N0	No	No	Yes	No	No/Unknown	Yes
＞3	≥40	Male	White	Unmarried	51~100	Unknown	Positive	Ishak 5-6	T3	N1	No	No	No	No	Yes	No/Unknown
≤3	≥40	Male	Black	Divorced	＞100	Unknown	Positive	Unknown	T3	N0	No	No	Yes	No	No/Unknown	No/Unknown
≤3	≥40	Male	Black	Divorced	21~50	Unknown	Positive	Unknown	T2	N0	Yes	No	No	No	No/Unknown	Yes
≤3	≥40	Male	Black	Divorced	21~50	Unknown	Positive	Unknown	T2	N0	No	No	Yes	No	No/Unknown	No/Unknown
≤3	≥40	Male	Black	Divorced	51~100	Unknown	Positive	Unknown	T4	N0	No	No	No	No	No/Unknown	No/Unknown
≤3	≥40	Male	White	Married	Unknown	Grade I	Positive	Ishak 5-6	T3	NX	No	No	Yes	No	No/Unknown	Yes
≤3	≥40	Male	Others	Unmarried	51~100	Unknown	Unknown	Unknown	T1	N0	No	No	Yes	No	No/Unknown	No/Unknown
≤3	≥40	Male	Black	Married	Unknown	Unknown	Unknown	Ishak 5-6	TX	N1	No	No	No	No	No/Unknown	No/Unknown
＞3	≥40	Female	Black	Unmarried	＞100	Grade II	Positive	Unknown	T4	N0	No	No	Yes	No	No/Unknown	Yes
≤3	≥40	Male	White	Unmarried	Unknown	Unknown	Positive	Unknown	T3	N0	No	No	No	No	No/Unknown	No/Unknown
＞3	≥40	Male	Black	Unmarried	＞100	Unknown	Positive	Unknown	T3	N1	Yes	No	No	No	No/Unknown	No/Unknown
＞3	≥40	Male	Black	Divorced	51~100	Unknown	Negative	Unknown	T3	N0	Yes	No	No	No	Yes	Yes
≤3	≥40	Male	Others	Unknown	Unknown	Unknown	Positive	Unknown	T4	N0	No	No	No	No	No/Unknown	No/Unknown
≤3	≥40	Male	White	Married	21~50	Unknown	Positive	Ishak 0-4	TX	N0	No	No	No	No	No/Unknown	Yes
＞3	≥40	Female	Black	Unmarried	51~100	Unknown	Positive	Ishak 5-6	T3	N0	No	No	Yes	No	No/Unknown	Yes
＞3	≥40	Female	White	Widowed	Unknown	Unknown	Unknown	Unknown	T4	N0	No	No	No	No	No/Unknown	Yes
≤3	≥40	Male	White	Unknown	Unknown	Unknown	Negative	Unknown	TX	N0	No	No	No	No	No/Unknown	No/Unknown
≤3	≥40	Male	White	Married	51~100	Unknown	Positive	Unknown	T1	N1	Unknown	Unknown	Unknown	No	No/Unknown	No/Unknown
＞3	≥40	Male	Black	Married	Unknown	Unknown	Positive	Unknown	T3	N0	Yes	No	No	No	Yes	Yes
＞3	≥40	Male	White	Married	＞100	Grade II	Positive	Unknown	T3	N0	Yes	No	No	No	No/Unknown	Yes
≤3	≥40	Male	Others	Unknown	Unknown	Unknown	Positive	Ishak 5-6	T4	N0	No	No	No	No	No/Unknown	No/Unknown
≤3	≥40	Male	White	Widowed	＞100	Unknown	Positive	Ishak 5-6	T3	N1	No	No	No	No	No/Unknown	No/Unknown
≤3	≥40	Female	Others	Married	＞100	Unknown	Positive	Unknown	T3	N0	No	No	Unknown	No	No/Unknown	No/Unknown
≤3	≥40	Male	White	Unmarried	21~50	Unknown	Positive	Ishak 5-6	T3	N0	No	No	No	No	No/Unknown	Yes
≤3	≥40	Female	White	Married	21~50	Unknown	Positive	Unknown	T3	N0	Yes	No	No	No	Yes	Yes
＞3	≥40	Male	Black	Divorced	21~50	Unknown	Positive	Ishak 5-6	T1	N0	Yes	No	No	No	No/Unknown	No/Unknown
＞3	≥40	Male	Black	Unmarried	≤20	Unknown	Positive	Unknown	T4	N1	No	No	No	No	No/Unknown	No/Unknown
≤3	≥40	Male	Black	Unmarried	＞100	Unknown	Positive	Unknown	T4	N1	No	No	No	No	No/Unknown	No/Unknown
＞3	≥40	Male	Black	Divorced	Unknown	Unknown	Unknown	Unknown	TX	NX	No	No	Yes	No	No/Unknown	No/Unknown
≤3	≥40	Male	Others	Married	＞100	Unknown	Unknown	Unknown	T1	N0	No	Yes	Yes	No	No/Unknown	No/Unknown
＞3	≥40	Male	Others	Unknown	＞100	Grade II	Positive	Ishak 0-4	T3	N0	No	No	Yes	No	No/Unknown	No/Unknown
≤3	≥40	Male	Others	Married	Unknown	Unknown	Positive	Unknown	T4	NX	Unknown	Unknown	Unknown	No	No/Unknown	No/Unknown
＞3	≥40	Male	Others	Divorced	Unknown	Grade II	Positive	Unknown	TX	NX	Yes	Unknown	No	No	Yes	Yes
＞3	≥40	Male	Others	Married	51~100	Unknown	Positive	Unknown	T3	NX	No	No	Yes	No	No/Unknown	No/Unknown
≤3	≥40	Male	Others	Unmarried	21~50	Grade III	Positive	Unknown	T2	N0	Yes	No	No	Surgery,unknown	Yes	No/Unknown
≤3	≥40	Male	Others	Unmarried	Unknown	Unknown	Unknown	Unknown	TX	NX	No	No	Yes	No	No/Unknown	No/Unknown
≤3	≥40	Male	Others	Unknown	Unknown	Grade III	Positive	Unknown	TX	N0	Yes	No	Yes	No	No/Unknown	No/Unknown
≤3	≥40	Male	Others	Unknown	Unknown	Unknown	Unknown	Unknown	TX	N1	Yes	Unknown	Yes	No	No/Unknown	No/Unknown
≤3	≥40	Male	White	Married	51~100	Unknown	Unknown	Unknown	T1	N0	Yes	No	No	No	Yes	No/Unknown
＞3	≥40	Female	White	Married	Unknown	Unknown	Positive	Unknown	TX	N0	Yes	No	No	No	Yes	No/Unknown
≤3	≥40	Male	White	Divorced	＞100	Unknown	Positive	Unknown	T1	N0	Yes	No	No	No	Yes	Yes
＞3	≥40	Male	White	Married	21~50	Grade II	Positive	Unknown	T2	N0	No	No	Yes	No	No/Unknown	Yes
≤3	≥40	Male	White	Divorced	51~100	Unknown	Unknown	Ishak 5-6	T1	N1	No	No	Yes	No	No/Unknown	No/Unknown
＞3	≥40	Male	White	Unmarried	51~100	Grade II	Positive	Unknown	T3	NX	No	No	No	No	No/Unknown	Yes
＞3	≥40	Male	White	Married	51~100	Unknown	Positive	Unknown	T3	N1	No	No	Yes	No	No/Unknown	Yes
≤3	≥40	Male	Others	Divorced	＞100	Unknown	Positive	Unknown	T3	N0	No	No	No	No	No/Unknown	No/Unknown
≤3	≥40	Male	White	Divorced	21~50	Unknown	Positive	Unknown	T2	N0	No	No	No	No	No/Unknown	No/Unknown
＞3	≥40	Male	White	Unmarried	＞100	Unknown	Positive	Ishak 0-4	T3	N0	No	No	Yes	No	No/Unknown	Yes
＞3	≥40	Male	White	Married	Unknown	Unknown	Positive	Unknown	TX	N0	No	No	No	No	No/Unknown	No/Unknown
≤3	≥40	Female	White	Widowed	51~100	Unknown	Unknown	Unknown	T3	N0	No	No	No	No	Yes	No/Unknown
≤3	≥40	Male	White	Married	Unknown	Unknown	Positive	Unknown	TX	N0	No	No	Yes	No	No/Unknown	No/Unknown
＞3	≥40	Male	Others	Widowed	51~100	Grade III	Positive	Unknown	T3	N1	No	No	No	No	No/Unknown	Yes
≤3	≥40	Female	White	Married	＞100	Unknown	Positive	Unknown	T3	N0	Yes	No	No	No	Yes	No/Unknown
＞3	≥40	Male	White	Married	＞100	Unknown	Positive	Unknown	T3	NX	No	No	No	No	No/Unknown	Yes
＞3	≥40	Male	White	Unmarried	51~100	Grade II	Positive	Ishak 0-4	T4	NX	No	No	Yes	No	No/Unknown	Yes
≤3	≥40	Male	White	Married	51~100	Unknown	Positive	Ishak 5-6	T1	N0	No	No	No	No	Yes	No/Unknown
≤3	≥40	Male	White	Married	＞100	Unknown	Positive	Unknown	T3	NX	Unknown	Unknown	Yes	No	No/Unknown	No/Unknown
＞3	≥40	Male	White	Married	≤20	Unknown	Negative	Unknown	T1	N1	No	No	No	No	No/Unknown	Yes
＞3	≥40	Male	Others	Married	51~100	Unknown	Unknown	Ishak 5-6	T1	N0	No	No	Yes	No	No/Unknown	Yes
＞3	≥40	Male	White	Married	51~100	Unknown	Negative	Unknown	T2	N0	No	No	No	No	No/Unknown	No/Unknown
＞3	≥40	Male	White	Married	21~50	Unknown	Positive	Ishak 5-6	T2	N0	Yes	No	No	No	Yes	Yes
≤3	≥40	Male	Others	Unmarried	＞100	Unknown	Positive	Unknown	T3	NX	No	No	No	No	No/Unknown	Yes
＞3	≥40	Male	Others	Married	Unknown	Unknown	Negative	Unknown	T4	NX	No	No	Yes	No	No/Unknown	Yes
＞3	≥40	Male	White	Divorced	＞100	Unknown	Positive	Unknown	T4	N1	Unknown	Unknown	No	No	No/Unknown	No/Unknown
≤3	≥40	Male	White	Unmarried	Unknown	Unknown	Positive	Ishak 0-4	T4	N0	No	No	Yes	No	No/Unknown	No/Unknown
＞3	＜40	Male	Others	Married	＞100	Grade II	Positive	Ishak 0-4	T1	N0	No	No	Yes	Wedge resection	No/Unknown	Yes
≤3	≥40	Male	Others	Married	＞100	Unknown	Unknown	Unknown	T4	N0	No	No	No	No	No/Unknown	No/Unknown
≤3	≥40	Male	White	Unmarried	Unknown	Unknown	Unknown	Unknown	TX	NX	No	No	No	No	No/Unknown	No/Unknown
＞3	＜40	Male	White	Unmarried	Unknown	Unknown	Negative	Unknown	TX	N1	Unknown	Unknown	Yes	No	No/Unknown	Yes
≤3	≥40	Male	White	Married	＞100	Unknown	Negative	Unknown	T3	N0	Yes	No	No	No	No/Unknown	No/Unknown
＞3	≥40	Male	White	Unmarried	51~100	Unknown	Positive	Unknown	T4	N1	No	No	No	No	No/Unknown	No/Unknown
≤3	≥40	Male	White	Married	Unknown	Unknown	Positive	Unknown	T3	N1	Yes	Unknown	No	No	Yes	No/Unknown
＞3	≥40	Male	Others	Married	51~100	Unknown	Unknown	Unknown	T3	NX	No	No	Yes	No	No/Unknown	Yes
≤3	≥40	Male	White	Married	＞100	Unknown	Positive	Unknown	T3	N0	No	No	Yes	No	No/Unknown	No/Unknown
≤3	≥40	Male	Others	Married	21~50	Unknown	Unknown	Unknown	T1	N0	No	No	Yes	No	No/Unknown	Yes
＞3	≥40	Male	White	Unmarried	21~50	Unknown	Positive	Unknown	T1	N1	Unknown	Unknown	Unknown	No	No/Unknown	Yes
≤3	≥40	Male	White	Married	Unknown	Unknown	Unknown	Unknown	T1	N1	Yes	No	Yes	No	No/Unknown	No/Unknown
≤3	≥40	Male	White	Married	＞100	Grade III	Positive	Ishak 0-4	T4	N1	No	No	No	No	No/Unknown	No/Unknown
≤3	≥40	Male	White	Divorced	Unknown	Unknown	Unknown	Unknown	TX	NX	Yes	Unknown	Yes	No	No/Unknown	No/Unknown
≤3	≥40	Female	White	Separated	＞100	Unknown	Positive	Unknown	T3	N0	No	No	Yes	No	No/Unknown	No/Unknown
≤3	≥40	Male	Others	Unknown	＞100	Unknown	Negative	Ishak 5-6	T3	NX	Unknown	Unknown	Unknown	No	No/Unknown	No/Unknown
≤3	≥40	Female	White	Unknown	Unknown	Unknown	Positive	Unknown	T1	N1	No	No	Yes	No	No/Unknown	No/Unknown
＞3	≥40	Male	White	Married	Unknown	Unknown	Unknown	Unknown	T1	N0	No	No	No	No	No/Unknown	Yes
≤3	≥40	Male	White	Married	＞100	Grade III	Positive	Unknown	T3	NX	No	No	Yes	No	No/Unknown	No/Unknown
≤3	≥40	Male	White	Married	51~100	Unknown	Positive	Ishak 5-6	T3	N1	No	No	No	No	No/Unknown	Yes
≤3	≥40	Male	Others	Separated	51~100	Unknown	Unknown	Unknown	T3	N0	No	No	Yes	No	No/Unknown	No/Unknown
＞3	≥40	Male	Others	Separated	＞100	Unknown	Positive	Unknown	T3	N0	No	No	Yes	No	No/Unknown	Yes
＞3	≥40	Male	White	Married	51~100	Grade III	Positive	Unknown	T3	N0	No	No	Yes	No	No/Unknown	Yes
＞3	≥40	Male	White	Married	21~50	Unknown	Positive	Ishak 5-6	T2	N1	No	No	No	No	No/Unknown	Yes
≤3	≥40	Male	White	Married	Unknown	Unknown	Positive	Unknown	TX	NX	Yes	No	No	No	No/Unknown	No/Unknown
≤3	≥40	Male	White	Married	21~50	Unknown	Positive	Ishak 5-6	T2	NX	No	No	Yes	No	No/Unknown	No/Unknown
≤3	≥40	Female	White	Widowed	21~50	Unknown	Positive	Unknown	T2	N1	No	No	Yes	No	No/Unknown	No/Unknown
≤3	≥40	Female	White	Married	Unknown	Unknown	Unknown	Unknown	T4	N1	No	No	Yes	No	No/Unknown	Yes
≤3	≥40	Male	Others	Unmarried	＞100	Grade III	Negative	Ishak 0-4	T4	N0	No	No	Yes	Lobectomy	No/Unknown	No/Unknown
≤3	≥40	Female	White	Unmarried	Unknown	Unknown	Positive	Unknown	TX	N0	Yes	No	Yes	No	No/Unknown	No/Unknown
＞3	≥40	Male	Others	Married	＞100	Unknown	Positive	Unknown	T3	N0	No	No	No	No	No/Unknown	Yes
≤3	≥40	Female	Others	Widowed	＞100	Unknown	Positive	Unknown	T3	N1	No	No	No	No	No/Unknown	No/Unknown
≤3	≥40	Female	White	Married	21~50	Unknown	Positive	Unknown	T2	N1	No	No	Yes	No	No/Unknown	No/Unknown
＞3	≥40	Male	Others	Married	＞100	Grade III	Negative	Unknown	T4	NX	No	No	No	Lobectomy	Yes	Yes
＞3	≥40	Male	Others	Married	＞100	Unknown	Positive	Unknown	T3	N0	No	No	No	No	No/Unknown	No/Unknown
＞3	≥40	Male	White	Divorced	51~100	Unknown	Positive	Ishak 5-6	T3	N0	Yes	No	No	No	No/Unknown	No/Unknown
≤3	≥40	Male	White	Unmarried	＞100	Unknown	Unknown	Unknown	T3	N0	No	No	Yes	No	No/Unknown	No/Unknown
≤3	≥40	Male	White	Divorced	Unknown	Unknown	Positive	Ishak 5-6	T4	N1	No	No	Yes	No	No/Unknown	No/Unknown
≤3	≥40	Male	White	Married	＞100	Unknown	Positive	Unknown	T1	NX	Yes	No	Yes	No	No/Unknown	No/Unknown
＞3	≥40	Male	White	Married	Unknown	Unknown	Positive	Unknown	T4	N1	No	No	No	No	No/Unknown	Yes
＞3	≥40	Male	White	Married	51~100	Grade III	Positive	Ishak 0-4	T3	N0	Yes	No	No	Lobectomy	Yes	No/Unknown
≤3	≥40	Male	White	Married	≤20	Unknown	Positive	Unknown	T4	N1	Yes	No	No	No	No/Unknown	No/Unknown
≤3	≥40	Male	Others	Married	＞100	Unknown	Positive	Unknown	T1	N1	No	No	Yes	No	No/Unknown	No/Unknown
＞3	≥40	Female	Others	Married	51~100	Unknown	Positive	Unknown	T3	N1	No	No	Yes	No	No/Unknown	Yes
≤3	≥40	Male	White	Married	51~100	Grade I	Unknown	Unknown	T3	N1	Yes	No	No	No	Yes	No/Unknown
＞3	≥40	Male	White	Separated	51~100	Grade II	Unknown	Unknown	T3	N0	Yes	No	No	No	Yes	Yes
＞3	≥40	Male	Others	Married	Unknown	Unknown	Unknown	Unknown	TX	NX	Yes	No	No	No	No/Unknown	No/Unknown
≤3	≥40	Male	Black	Unmarried	＞100	Unknown	Positive	Unknown	T3	N0	No	No	No	No	No/Unknown	Yes
≤3	≥40	Male	White	Unmarried	51~100	Unknown	Positive	Ishak 0-4	T3	N0	Yes	No	No	No	Yes	Yes
≤3	≥40	Male	White	Divorced	21~50	Unknown	Unknown	Unknown	T3	N0	No	No	No	No	No/Unknown	No/Unknown
＞3	≥40	Male	Others	Married	51~100	Grade III	Negative	Unknown	T4	N0	No	No	No	Lobectomy	No/Unknown	No/Unknown
≤3	≥40	Male	White	Married	Unknown	Unknown	Unknown	Unknown	T4	N0	No	No	Yes	No	No/Unknown	No/Unknown
≤3	≥40	Male	White	Unmarried	21~50	Grade III	Positive	Unknown	T3	N1	No	No	Yes	No	No/Unknown	No/Unknown
≤3	≥40	Male	White	Divorced	＞100	Grade II	Positive	Unknown	T3	N0	No	No	No	No	No/Unknown	No/Unknown
≤3	≥40	Male	White	Married	＞100	Grade II	Positive	Ishak 5-6	T1	N0	No	No	No	No	No/Unknown	No/Unknown
≤3	≥40	Male	Black	Unmarried	Unknown	Unknown	Positive	Ishak 5-6	T3	N0	Yes	No	No	No	No/Unknown	No/Unknown
＞3	≥40	Male	Others	Married	51~100	Unknown	Negative	Unknown	T3	N1	Yes	No	No	No	Yes	Yes
≤3	≥40	Male	White	Unmarried	Unknown	Unknown	Positive	Unknown	TX	N0	No	No	Yes	No	No/Unknown	No/Unknown
≤3	≥40	Male	White	Married	51~100	Grade III	Positive	Unknown	T3	N1	No	No	No	No	No/Unknown	Yes
＞3	≥40	Male	White	Married	≤20	Unknown	Positive	Unknown	T1	N0	Yes	No	No	No	Yes	Yes
≤3	≥40	Male	White	Married	＞100	Unknown	Positive	Unknown	T1	N0	No	No	Yes	No	No/Unknown	Yes
＞3	≥40	Female	White	Married	51~100	Grade III	Unknown	Unknown	T1	N0	No	No	Yes	No	No/Unknown	No/Unknown
≤3	≥40	Male	White	Divorced	51~100	Unknown	Negative	Unknown	T3	N0	Unknown	Unknown	Unknown	No	No/Unknown	No/Unknown
≤3	≥40	Male	White	Unmarried	51~100	Unknown	Positive	Unknown	T3	N1	Yes	No	Yes	No	No/Unknown	No/Unknown
＞3	≥40	Male	White	Unmarried	21~50	Unknown	Positive	Ishak 5-6	T2	N1	No	No	No	No	No/Unknown	Yes
≤3	≥40	Male	White	Unmarried	＞100	Grade II	Positive	Unknown	T1	N0	No	No	Yes	No	No/Unknown	Yes
≤3	≥40	Male	White	Married	51~100	Unknown	Positive	Ishak 5-6	T1	NX	Yes	No	No	No	No/Unknown	No/Unknown
≤3	≥40	Male	White	Unmarried	51~100	Grade III	Unknown	Ishak 0-4	T3	N1	Yes	No	No	No	Yes	No/Unknown
≤3	≥40	Male	White	Married	51~100	Unknown	Positive	Ishak 5-6	T3	N1	No	No	No	No	No/Unknown	No/Unknown
≤3	≥40	Female	Others	Married	＞100	Grade I	Positive	Unknown	T3	N0	No	No	Yes	No	No/Unknown	No/Unknown
≤3	≥40	Female	White	Married	Unknown	Unknown	Positive	Ishak 5-6	TX	N0	Yes	No	No	No	Yes	Yes
≤3	≥40	Male	Others	Married	＞100	Grade III	Positive	Unknown	T3	N0	Yes	No	Yes	No	No/Unknown	No/Unknown
＞3	≥40	Male	White	Divorced	51~100	Grade I	Positive	Unknown	T3	N0	No	No	Yes	No	No/Unknown	Yes
≤3	≥40	Female	White	Divorced	21~50	Unknown	Positive	Unknown	T3	N0	Yes	No	No	No	No/Unknown	No/Unknown
＞3	≥40	Male	Black	Married	＞100	Unknown	Positive	Unknown	T3	N0	No	No	No	No	No/Unknown	No/Unknown
≤3	≥40	Male	White	Divorced	21~50	Unknown	Negative	Ishak 5-6	T1	N0	No	Yes	No	No	No/Unknown	No/Unknown
≤3	≥40	Female	White	Married	21~50	Unknown	Unknown	Unknown	T1	N0	Yes	No	No	No	No/Unknown	No/Unknown
＞3	≥40	Male	White	Married	51~100	Unknown	Positive	Ishak 5-6	T3	N0	No	No	Yes	No	No/Unknown	Yes
≤3	≥40	Male	Others	Married	Unknown	Unknown	Positive	Unknown	T3	NX	No	No	Yes	No	No/Unknown	No/Unknown
≤3	≥40	Male	Others	Married	＞100	Unknown	Positive	Unknown	T3	N1	No	No	Yes	No	No/Unknown	No/Unknown
≤3	≥40	Male	Black	Unmarried	＞100	Unknown	Positive	Unknown	T3	N0	No	No	No	No	No/Unknown	No/Unknown
≤3	≥40	Male	White	Married	51~100	Unknown	Negative	Ishak 5-6	T4	NX	Yes	Unknown	Yes	No	No/Unknown	No/Unknown
≤3	≥40	Male	Black	Married	51~100	Unknown	Positive	Ishak 0-4	T3	N0	Yes	No	No	No	Yes	No/Unknown
≤3	≥40	Male	White	Divorced	Unknown	Unknown	Positive	Ishak 5-6	TX	N0	Yes	No	Yes	No	Yes	No/Unknown
≤3	≥40	Female	White	Married	51~100	Unknown	Positive	Unknown	T3	N0	No	No	Yes	No	No/Unknown	Yes
≤3	≥40	Female	White	Married	Unknown	Unknown	Positive	Unknown	T3	NX	No	No	Yes	No	No/Unknown	No/Unknown
≤3	≥40	Male	White	Unmarried	＞100	Grade II	Positive	Unknown	T3	N1	No	No	No	No	No/Unknown	No/Unknown
≤3	≥40	Male	White	Married	＞100	Unknown	Positive	Unknown	T1	N0	No	No	Yes	No	No/Unknown	No/Unknown
≤3	≥40	Female	Others	Married	Unknown	Unknown	Positive	Unknown	T4	N0	No	No	Yes	No	No/Unknown	No/Unknown
≤3	≥40	Male	Others	Married	51~100	Unknown	Positive	Unknown	T3	N1	No	No	No	No	No/Unknown	No/Unknown
≤3	≥40	Male	Others	Widowed	Unknown	Unknown	Unknown	Unknown	TX	N0	No	No	Yes	No	No/Unknown	Yes
＞3	≥40	Female	Black	Divorced	≤20	Unknown	Unknown	Unknown	T3	N0	No	No	No	No	No/Unknown	Yes
＞3	≥40	Female	White	Unmarried	Unknown	Unknown	Unknown	Unknown	TX	N0	No	No	Yes	No	No/Unknown	No/Unknown
≤3	≥40	Male	White	Divorced	21~50	Grade II	Unknown	Unknown	T2	NX	Yes	No	No	No	No/Unknown	No/Unknown
≤3	≥40	Male	White	Unmarried	Unknown	Unknown	Positive	Unknown	T1	N0	No	No	Yes	No	No/Unknown	No/Unknown
＞3	≥40	Male	White	Divorced	≤20	Unknown	Unknown	Ishak 5-6	T2	N0	Yes	No	No	No	Yes	Yes
≤3	≥40	Female	Others	Married	51~100	Unknown	Unknown	Unknown	T3	NX	No	No	No	No	No/Unknown	No/Unknown
≤3	≥40	Male	Black	Unmarried	21~50	Unknown	Positive	Unknown	T3	N1	No	No	Yes	No	No/Unknown	Yes
≤3	≥40	Male	Others	Married	21~50	Unknown	Positive	Unknown	T3	N1	No	No	No	No	No/Unknown	Yes
≤3	≥40	Male	Others	Married	Unknown	Unknown	Positive	Unknown	TX	N0	No	No	No	No	No/Unknown	No/Unknown
≤3	≥40	Male	Black	Married	51~100	Unknown	Positive	Ishak 5-6	T4	N1	Yes	No	No	No	No/Unknown	No/Unknown
＞3	≥40	Male	Others	Married	＞100	Unknown	Positive	Ishak 0-4	T3	N0	Yes	No	No	No	No/Unknown	Yes
≤3	≥40	Male	Others	Unmarried	51~100	Unknown	Positive	Ishak 5-6	T3	N0	No	No	Yes	No	No/Unknown	No/Unknown
＞3	≥40	Male	White	Married	21~50	Unknown	Positive	Ishak 5-6	T2	N0	Yes	No	No	No	No/Unknown	No/Unknown
≤3	≥40	Male	Others	Married	≤20	Unknown	Negative	Ishak 0-4	T1	N0	No	No	No	No	Yes	Yes
≤3	≥40	Male	White	Unmarried	51~100	Unknown	Negative	Ishak 5-6	T1	N1	No	No	No	No	No/Unknown	No/Unknown
＞3	≥40	Male	White	Unmarried	21~50	Grade I	Positive	Ishak 5-6	T2	N0	Yes	No	No	No	No/Unknown	Yes
≤3	≥40	Male	Others	Married	＞100	Unknown	Positive	Ishak 0-4	T3	N1	No	No	Yes	No	No/Unknown	Yes
＞3	≥40	Female	White	Divorced	≤20	Unknown	Positive	Unknown	T1	N0	No	No	No	No	No/Unknown	Yes
＞3	≥40	Male	Black	Married	51~100	Unknown	Positive	Ishak 5-6	T3	N1	No	No	No	No	Yes	Yes
≤3	≥40	Female	Others	Unmarried	51~100	Unknown	Negative	Unknown	T3	N0	No	No	No	No	No/Unknown	No/Unknown
≤3	≥40	Female	White	Married	21~50	Unknown	Negative	Unknown	T1	N0	No	No	Yes	No	No/Unknown	Yes
≤3	≥40	Male	White	Unmarried	Unknown	Unknown	Positive	Ishak 5-6	TX	N0	Yes	No	Yes	No	No/Unknown	No/Unknown
≤3	≥40	Male	Others	Married	Unknown	Unknown	Positive	Ishak 5-6	TX	N0	No	No	Yes	No	No/Unknown	No/Unknown
＞3	≥40	Male	White	Married	21~50	Unknown	Negative	Ishak 5-6	T3	N1	Yes	No	No	No	Yes	No/Unknown
≤3	≥40	Male	Others	Married	＞100	Unknown	Positive	Unknown	T3	N0	Yes	No	Yes	No	No/Unknown	No/Unknown
≤3	≥40	Male	White	Unmarried	≤20	Unknown	Positive	Ishak 5-6	T2	N1	Yes	No	Yes	No	No/Unknown	No/Unknown
≤3	≥40	Male	White	Unmarried	51~100	Unknown	Positive	Unknown	T3	N1	No	No	Yes	No	No/Unknown	No/Unknown
≤3	≥40	Female	White	Married	＞100	Unknown	Positive	Unknown	T3	N0	No	No	Yes	No	No/Unknown	No/Unknown
＞3	≥40	Female	Others	Married	Unknown	Unknown	Unknown	Unknown	T3	N1	Unknown	Unknown	Unknown	No	No/Unknown	No/Unknown
≤3	≥40	Female	Others	Married	51~100	Unknown	Positive	Ishak 5-6	T3	N0	No	No	Yes	No	No/Unknown	No/Unknown
≤3	≥40	Female	Others	Widowed	≤20	Unknown	Positive	Unknown	T3	N1	No	No	Yes	No	No/Unknown	Yes
≤3	≥40	Male	White	Unmarried	Unknown	Unknown	Positive	Unknown	TX	N0	No	No	Yes	No	No/Unknown	No/Unknown
＞3	≥40	Male	White	Divorced	21~50	Unknown	Positive	Ishak 5-6	T2	N1	No	No	No	No	No/Unknown	Yes
＞3	≥40	Male	White	Married	21~50	Unknown	Positive	Unknown	T2	NX	No	No	No	No	No/Unknown	Yes
≤3	≥40	Female	White	Unmarried	21~50	Unknown	Positive	Unknown	T3	N0	No	No	No	No	No/Unknown	No/Unknown
≤3	≥40	Female	White	Widowed	＞100	Grade III	Positive	Unknown	T1	N0	Unknown	Unknown	Unknown	No	No/Unknown	No/Unknown
≤3	≥40	Male	White	Widowed	51~100	Unknown	Positive	Unknown	TX	N1	No	No	No	No	No/Unknown	No/Unknown
≤3	≥40	Male	Others	Unmarried	Unknown	Unknown	Positive	Unknown	TX	N0	No	No	Yes	No	No/Unknown	No/Unknown
≤3	≥40	Male	White	Married	＞100	Grade III	Positive	Unknown	T3	N0	No	No	Yes	No	No/Unknown	No/Unknown
＞3	≥40	Male	White	Married	51~100	Unknown	Positive	Unknown	T3	N0	Yes	No	No	No	Yes	Yes
＞3	≥40	Male	Others	Married	21~50	Unknown	Positive	Ishak 0-4	T1	N0	No	No	Yes	No	No/Unknown	Yes
＞3	≥40	Male	White	Married	Unknown	Unknown	Positive	Unknown	TX	N0	No	Unknown	Unknown	No	No/Unknown	No/Unknown
≤3	≥40	Male	Others	Married	Unknown	Grade III	Positive	Unknown	T1	N0	No	No	No	No	No/Unknown	No/Unknown
≤3	≥40	Male	White	Unmarried	51~100	Grade I	Positive	Unknown	TX	N1	No	No	Yes	No	No/Unknown	No/Unknown
≤3	≥40	Male	White	Unknown	51~100	Unknown	Positive	Unknown	T3	N0	No	No	No	No	No/Unknown	No/Unknown
＞3	≥40	Female	Others	Married	21~50	Grade III	Positive	Unknown	T4	N0	No	No	No	Lobectomy	No/Unknown	No/Unknown
≤3	＜40	Male	White	Unmarried	51~100	Grade III	Positive	Unknown	T1	N0	No	No	Yes	No	No/Unknown	No/Unknown
≤3	≥40	Male	Black	Unmarried	Unknown	Unknown	Unknown	Unknown	TX	NX	No	No	Yes	No	No/Unknown	No/Unknown
＞3	≥40	Male	White	Married	21~50	Unknown	Positive	Unknown	T3	NX	Unknown	Unknown	Yes	No	No/Unknown	No/Unknown
＞3	≥40	Female	Others	Married	Unknown	Unknown	Unknown	Unknown	TX	NX	Unknown	Unknown	Unknown	No	No/Unknown	No/Unknown
≤3	≥40	Male	White	Married	51~100	Unknown	Unknown	Unknown	T1	N1	Yes	No	No	No	No/Unknown	Yes
≤3	≥40	Male	Black	Unmarried	51~100	Unknown	Positive	Unknown	T3	N0	No	No	Yes	No	No/Unknown	No/Unknown
＞3	≥40	Male	White	Married	51~100	Unknown	Positive	Unknown	T1	N0	Yes	No	No	No	Yes	Yes
≤3	≥40	Male	Black	Unmarried	Unknown	Grade II	Positive	Ishak 5-6	T1	N1	Unknown	Unknown	Unknown	No	No/Unknown	No/Unknown
≤3	≥40	Male	Black	Unmarried	Unknown	Unknown	Positive	Unknown	TX	N0	No	No	Yes	No	No/Unknown	No/Unknown
≤3	≥40	Male	White	Married	Unknown	Unknown	Unknown	Unknown	TX	NX	No	No	Yes	No	No/Unknown	Yes
≤3	≥40	Male	Others	Married	＞100	Unknown	Positive	Ishak 5-6	T3	N0	No	No	Yes	No	No/Unknown	No/Unknown
＞3	≥40	Male	White	Unmarried	Unknown	Grade I	Unknown	Unknown	TX	N0	Yes	No	No	No	No/Unknown	No/Unknown
＞3	≥40	Male	White	Married	＞100	Unknown	Positive	Unknown	T4	N0	No	Yes	No	No	Yes	Yes
＞3	≥40	Male	White	Married	＞100	Grade III	Unknown	Unknown	T1	N0	Yes	No	No	No	No/Unknown	No/Unknown
≤3	≥40	Male	White	Married	21~50	Unknown	Positive	Unknown	TX	N0	No	No	Yes	No	No/Unknown	No/Unknown
≤3	≥40	Male	White	Divorced	＞100	Grade III	Positive	Unknown	T3	N0	No	No	No	No	No/Unknown	No/Unknown
≤3	≥40	Male	White	Married	Unknown	Grade II	Positive	Unknown	TX	NX	No	No	No	No	No/Unknown	No/Unknown
＞3	≥40	Male	Others	Married	＞100	Grade II	Positive	Unknown	T3	N1	No	No	Yes	No	No/Unknown	Yes
＞3	≥40	Female	White	Unmarried	Unknown	Unknown	Unknown	Unknown	TX	N0	Yes	No	No	No	No/Unknown	No/Unknown
≤3	≥40	Male	White	Married	＞100	Grade III	Positive	Ishak 0-4	T1	N1	No	No	Yes	No	No/Unknown	Yes
≤3	＜40	Female	White	Unmarried	21~50	Grade I	Negative	Unknown	T2	N0	No	Yes	No	No	No/Unknown	No/Unknown
≤3	≥40	Male	White	Separated	51~100	Grade II	Positive	Unknown	T3	N0	No	No	No	No	No/Unknown	Yes
≤3	≥40	Male	White	Unmarried	51~100	Unknown	Positive	Unknown	T1	N0	Yes	No	Yes	No	No/Unknown	No/Unknown
＞3	≥40	Female	White	Widowed	Unknown	Unknown	Unknown	Unknown	TX	N0	Yes	No	No	No	No/Unknown	Yes
＞3	≥40	Male	White	Married	21~50	Grade III	Positive	Unknown	T3	N0	No	No	No	No	No/Unknown	Yes
＞3	＜40	Male	White	Unmarried	＞100	Grade II	Negative	Unknown	T3	N1	No	No	No	No	No/Unknown	Yes
＞3	≥40	Male	White	Married	21~50	Unknown	Positive	Unknown	T3	N0	Yes	No	No	No	No/Unknown	No/Unknown
≤3	≥40	Male	White	Separated	＞100	Unknown	Positive	Unknown	T4	N0	No	No	Yes	No	No/Unknown	No/Unknown
≤3	≥40	Male	White	Unmarried	＞100	Unknown	Positive	Unknown	T3	N0	No	No	No	No	No/Unknown	No/Unknown
＞3	≥40	Female	Others	Widowed	51~100	Grade II	Negative	Unknown	T1	N0	No	No	Yes	No	No/Unknown	No/Unknown
＞3	≥40	Female	White	Widowed	51~100	Grade III	Positive	Unknown	T3	N1	No	No	No	No	Yes	Yes
＞3	≥40	Male	Others	Married	51~100	Grade II	Positive	Unknown	T2	N0	No	No	No	Wedge resection	No/Unknown	No/Unknown
≤3	≥40	Male	Others	Separated	51~100	Unknown	Positive	Unknown	T3	N0	No	Yes	No	No	No/Unknown	No/Unknown
≤3	≥40	Female	White	Widowed	Unknown	Grade II	Positive	Unknown	TX	N0	No	No	Yes	No	No/Unknown	No/Unknown
＞3	≥40	Female	White	Widowed	＞100	Unknown	Positive	Unknown	T3	NX	No	No	No	No	No/Unknown	Yes
≤3	≥40	Female	White	Married	≤20	Unknown	Positive	Unknown	T1	N1	No	No	No	No	No/Unknown	No/Unknown
≤3	≥40	Female	White	Unmarried	Unknown	Unknown	Positive	Unknown	TX	N0	Unknown	Unknown	Yes	No	No/Unknown	No/Unknown
＞3	≥40	Male	Others	Married	51~100	Grade III	Positive	Unknown	T4	N1	No	No	No	Lobectomy	No/Unknown	Yes
＞3	≥40	Male	White	Married	≤20	Grade II	Positive	Unknown	T3	N0	No	No	No	No	No/Unknown	No/Unknown
＞3	≥40	Male	White	Married	＞100	Unknown	Positive	Unknown	T1	N0	Yes	No	No	No	Yes	Yes
＞3	≥40	Male	Others	Widowed	Unknown	Grade II	Positive	Unknown	T2	N0	No	No	No	No	No/Unknown	Yes
＞3	≥40	Female	White	Widowed	21~50	Grade III	Unknown	Unknown	T1	N1	No	No	No	No	No/Unknown	No/Unknown
≤3	≥40	Male	White	Married	21~50	Unknown	Positive	Ishak 5-6	T2	N0	No	No	No	No	No/Unknown	Yes
≤3	≥40	Male	Others	Married	＞100	Unknown	Positive	Unknown	T3	N0	No	No	Yes	No	No/Unknown	No/Unknown
≤3	≥40	Male	White	Widowed	51~100	Unknown	Positive	Unknown	T3	N1	No	No	No	No	No/Unknown	No/Unknown
≤3	≥40	Male	White	Divorced	Unknown	Unknown	Positive	Unknown	TX	NX	No	No	No	No	No/Unknown	No/Unknown
＞3	≥40	Female	Others	Divorced	＞100	Grade II	Positive	Unknown	T3	N0	No	No	No	No	No/Unknown	Yes
＞3	≥40	Male	White	Married	Unknown	Unknown	Positive	Ishak 5-6	TX	N0	Yes	No	No	No	No/Unknown	Yes
＞3	≥40	Male	White	Married	＞100	Grade III	Negative	Unknown	T3	N1	Yes	Unknown	Yes	No	No/Unknown	No/Unknown
≤3	≥40	Female	White	Widowed	21~50	Grade III	Positive	Unknown	T1	N0	No	No	No	No	No/Unknown	Yes
＞3	≥40	Male	White	Unmarried	Unknown	Grade III	Unknown	Unknown	T1	N0	No	No	No	Lobectomy	No/Unknown	No/Unknown
＞3	≥40	Male	Black	Married	Unknown	Grade I	Positive	Unknown	TX	NX	No	No	Yes	No	No/Unknown	Yes
≤3	≥40	Male	Black	Divorced	Unknown	Unknown	Positive	Unknown	TX	N1	Yes	No	Yes	No	No/Unknown	No/Unknown
≤3	≥40	Male	White	Unmarried	Unknown	Unknown	Positive	Unknown	T1	N0	No	No	No	No	No/Unknown	No/Unknown
≤3	≥40	Male	White	Married	51~100	Unknown	Positive	Unknown	T3	N0	No	No	No	No	No/Unknown	No/Unknown
≤3	≥40	Male	White	Divorced	＞100	Grade III	Unknown	Unknown	T3	NX	No	No	No	No	No/Unknown	No/Unknown
≤3	＜40	Male	Others	Married	Unknown	Grade III	Positive	Unknown	T3	N1	No	No	Yes	No	No/Unknown	Yes
＞3	≥40	Male	White	Divorced	21~50	Grade III	Positive	Unknown	T2	N0	Yes	No	No	No	No/Unknown	No/Unknown
＞3	≥40	Male	Black	Divorced	51~100	Grade III	Negative	Unknown	T3	N1	Yes	No	Yes	No	No/Unknown	Yes
＞3	≥40	Male	Others	Married	Unknown	Unknown	Positive	Unknown	TX	N0	No	No	No	No	Yes	Yes
＞3	≥40	Male	White	Unknown	21~50	Grade II	Positive	Ishak 5-6	T3	NX	No	No	No	No	No/Unknown	No/Unknown
≤3	≥40	Male	White	Unmarried	51~100	Unknown	Unknown	Unknown	TX	N0	Yes	No	No	No	No/Unknown	No/Unknown
≤3	≥40	Female	White	Widowed	51~100	Unknown	Positive	Unknown	T3	N0	Yes	No	No	Wedge resection	No/Unknown	No/Unknown
≤3	≥40	Male	White	Unmarried	＞100	Unknown	Negative	Unknown	T2	N0	Unknown	Unknown	No	No	No/Unknown	No/Unknown
＞3	≥40	Female	White	Married	Unknown	Unknown	Unknown	Unknown	TX	N0	No	No	Yes	No	No/Unknown	No/Unknown
＞3	≥40	Female	Others	Widowed	21~50	Unknown	Positive	Unknown	T2	N0	No	No	No	No	No/Unknown	No/Unknown
＞3	≥40	Female	Others	Unmarried	＞100	Unknown	Positive	Unknown	T1	N0	No	No	Yes	No	No/Unknown	Yes
＞3	≥40	Male	White	Married	＞100	Unknown	Positive	Unknown	T3	N0	No	No	No	No	No/Unknown	Yes
＞3	≥40	Male	White	Unknown	51~100	Unknown	Positive	Unknown	T3	N0	No	No	Yes	No	No/Unknown	Yes
≤3	≥40	Female	Others	Widowed	Unknown	Unknown	Positive	Unknown	TX	N1	No	No	Yes	No	No/Unknown	Yes
≤3	≥40	Male	White	Married	＞100	Grade III	Positive	Unknown	T3	NX	No	No	No	No	No/Unknown	No/Unknown
≤3	≥40	Male	White	Married	51~100	Grade II	Positive	Unknown	T3	N0	No	No	No	No	No/Unknown	No/Unknown
＞3	≥40	Male	White	Married	51~100	Grade I	Negative	Unknown	T1	N0	No	Yes	No	No	No/Unknown	Yes
≤3	≥40	Male	Others	Married	51~100	Unknown	Positive	Unknown	T3	NX	Yes	No	Yes	No	No/Unknown	Yes
＞3	≥40	Male	Others	Unknown	Unknown	Unknown	Positive	Unknown	TX	NX	Yes	Unknown	Unknown	No	No/Unknown	No/Unknown
≤3	≥40	Male	White	Married	＞100	Unknown	Unknown	Unknown	T3	NX	No	No	No	No	No/Unknown	No/Unknown
＞3	≥40	Female	White	Widowed	Unknown	Grade IV	Unknown	Unknown	TX	N0	Unknown	Unknown	Unknown	No	No/Unknown	No/Unknown
≤3	≥40	Male	Others	Married	＞100	Grade III	Unknown	Unknown	T2	N1	Unknown	No	Yes	No	No/Unknown	No/Unknown
≤3	≥40	Male	Others	Unmarried	Unknown	Unknown	Positive	Unknown	TX	NX	No	No	No	No	No/Unknown	No/Unknown
≤3	≥40	Male	White	Unmarried	21~50	Unknown	Positive	Unknown	T1	NX	Yes	No	No	No	No/Unknown	No/Unknown
≤3	≥40	Male	Others	Unmarried	Unknown	Unknown	Positive	Unknown	TX	N0	No	No	Yes	No	No/Unknown	No/Unknown
≤3	≥40	Male	White	Unmarried	51~100	Unknown	Positive	Unknown	T3	N0	No	No	No	No	No/Unknown	No/Unknown
＞3	≥40	Male	Others	Married	＞100	Grade I	Negative	Unknown	T3	N0	No	No	No	No	No/Unknown	No/Unknown
≤3	≥40	Male	Others	Married	51~100	Unknown	Positive	Unknown	T3	NX	No	No	Yes	No	No/Unknown	No/Unknown
≤3	≥40	Male	White	Married	Unknown	Unknown	Positive	Unknown	T3	N1	No	No	No	No	No/Unknown	Yes
＞3	≥40	Female	Others	Unmarried	51~100	Grade III	Positive	Unknown	T3	N1	No	No	No	No	No/Unknown	Yes
≤3	≥40	Female	Black	Married	Unknown	Unknown	Positive	Unknown	T3	N0	No	No	Yes	No	No/Unknown	No/Unknown
≤3	≥40	Male	White	Married	51~100	Grade IV	Positive	Unknown	T3	N0	No	Yes	No	No	No/Unknown	No/Unknown
＞3	≥40	Male	Black	Unknown	＞100	Grade III	Negative	Unknown	T1	NX	No	No	Unknown	No	No/Unknown	Yes
＞3	≥40	Male	White	Unmarried	Unknown	Unknown	Unknown	Unknown	TX	NX	Yes	No	No	No	Yes	Yes
≤3	≥40	Female	Others	Unknown	＞100	Grade III	Positive	Unknown	T3	N1	No	No	No	No	No/Unknown	Yes
＞3	≥40	Male	White	Unmarried	＞100	Unknown	Positive	Unknown	T3	NX	Yes	No	Yes	No	No/Unknown	Yes
≤3	≥40	Male	Others	Married	51~100	Unknown	Positive	Unknown	TX	NX	No	No	Yes	No	No/Unknown	No/Unknown
＞3	≥40	Male	Black	Widowed	＞100	Grade III	Positive	Unknown	T4	N0	No	No	Yes	No	No/Unknown	Yes
＞3	≥40	Male	White	Unmarried	51~100	Grade III	Positive	Unknown	T3	N1	No	No	Yes	No	Yes	Yes
＞3	≥40	Male	White	Divorced	51~100	Unknown	Positive	Unknown	T3	N0	No	No	No	No	No/Unknown	Yes
＞3	≥40	Male	White	Married	＞100	Grade I	Positive	Unknown	T4	N0	No	No	No	No	Yes	No/Unknown
＞3	≥40	Male	White	Unmarried	Unknown	Grade II	Positive	Unknown	T4	N1	Yes	No	Yes	No	No/Unknown	Yes
＞3	≥40	Female	White	Widowed	51~100	Unknown	Negative	Unknown	T2	N1	No	No	No	No	No/Unknown	No/Unknown
≤3	≥40	Female	White	Unmarried	51~100	Unknown	Positive	Unknown	TX	N0	Yes	No	No	No	No/Unknown	No/Unknown
≤3	≥40	Male	White	Married	21~50	Unknown	Positive	Unknown	T2	N1	Yes	No	No	No	No/Unknown	No/Unknown
≤3	≥40	Male	White	Married	Unknown	Grade II	Positive	Unknown	T3	N1	No	No	No	No	No/Unknown	Yes
≤3	≥40	Male	Others	Married	Unknown	Unknown	Unknown	Unknown	TX	NX	No	No	No	No	No/Unknown	Yes
＞3	≥40	Female	White	Unmarried	＞100	Grade I	Negative	Unknown	T1	NX	No	No	No	No	No/Unknown	No/Unknown
≤3	≥40	Male	White	Married	Unknown	Unknown	Positive	Unknown	T3	N0	No	No	No	No	No/Unknown	Yes
＞3	≥40	Male	Others	Unmarried	Unknown	Unknown	Positive	Ishak 5-6	T3	NX	No	No	No	No	No/Unknown	No/Unknown
＞3	≥40	Male	Others	Married	＞100	Grade III	Positive	Unknown	T3	N0	No	No	Yes	No	No/Unknown	Yes
≤3	≥40	Male	White	Married	21~50	Unknown	Positive	Unknown	T3	N0	Yes	No	No	No	No/Unknown	No/Unknown
≤3	≥40	Female	Black	Married	Unknown	Unknown	Unknown	Unknown	TX	NX	No	No	Yes	No	No/Unknown	No/Unknown
≤3	≥40	Male	White	Married	Unknown	Grade III	Positive	Unknown	TX	N0	No	No	No	No	No/Unknown	No/Unknown
≤3	≥40	Male	Black	Separated	51~100	Grade I	Positive	Unknown	T1	N0	No	Unknown	No	No	No/Unknown	No/Unknown
≤3	≥40	Female	White	Widowed	＞100	Unknown	Negative	Unknown	T3	N1	No	No	No	No	No/Unknown	No/Unknown
≤3	≥40	Female	White	Widowed	＞100	Unknown	Positive	Unknown	T1	N0	Yes	No	No	No	No/Unknown	No/Unknown
≤3	≥40	Male	Others	Divorced	Unknown	Unknown	Unknown	Unknown	TX	NX	No	No	No	No	No/Unknown	Yes
≤3	≥40	Male	White	Widowed	＞100	Grade III	Positive	Unknown	T4	N1	Unknown	No	No	No	No/Unknown	No/Unknown
＞3	≥40	Female	White	Unmarried	51~100	Unknown	Positive	Ishak 5-6	T3	N1	Yes	No	No	No	Yes	Yes
＞3	≥40	Female	White	Widowed	＞100	Unknown	Positive	Ishak 5-6	T3	N1	No	No	No	No	No/Unknown	Yes
≤3	≥40	Male	Others	Unmarried	51~100	Unknown	Positive	Unknown	T1	NX	Unknown	Unknown	Unknown	No	No/Unknown	No/Unknown
≤3	≥40	Female	White	Widowed	51~100	Grade II	Positive	Unknown	T1	N0	Yes	No	No	No	Yes	No/Unknown
≤3	≥40	Male	White	Married	Unknown	Unknown	Positive	Unknown	TX	NX	No	No	Yes	No	No/Unknown	No/Unknown
≤3	≥40	Male	White	Divorced	51~100	Unknown	Positive	Unknown	T3	N0	No	No	Yes	No	No/Unknown	No/Unknown
＞3	≥40	Male	White	Unmarried	Unknown	Grade II	Negative	Unknown	TX	NX	No	No	Unknown	No	No/Unknown	No/Unknown
＞3	≥40	Male	Others	Unknown	＞100	Grade II	Positive	Unknown	T2	N0	No	No	Yes	No	No/Unknown	Yes
≤3	≥40	Male	White	Married	51~100	Unknown	Unknown	Unknown	T3	N1	No	No	No	No	No/Unknown	No/Unknown
≤3	≥40	Male	Black	Unmarried	＞100	Unknown	Positive	Unknown	T1	N1	No	No	Yes	No	No/Unknown	No/Unknown
≤3	≥40	Male	Others	Married	Unknown	Unknown	Negative	Unknown	TX	NX	No	No	Yes	No	No/Unknown	No/Unknown
≤3	≥40	Male	Others	Married	＞100	Unknown	Positive	Unknown	T2	N1	No	No	No	No	No/Unknown	Yes
≤3	≥40	Male	White	Unmarried	51~100	Unknown	Positive	Unknown	T3	N1	No	No	No	No	No/Unknown	No/Unknown
＞3	≥40	Male	Black	Divorced	＞100	Unknown	Positive	Unknown	T4	N0	No	No	No	No	No/Unknown	No/Unknown
≤3	≥40	Male	Others	Unmarried	51~100	Unknown	Positive	Unknown	T3	N0	No	No	Yes	No	No/Unknown	No/Unknown
≤3	≥40	Male	White	Married	＞100	Unknown	Positive	Unknown	T1	NX	No	No	Yes	No	No/Unknown	Yes
≤3	≥40	Male	White	Divorced	Unknown	Unknown	Negative	Unknown	TX	N0	No	No	Yes	No	No/Unknown	No/Unknown
≤3	≥40	Male	White	Divorced	Unknown	Unknown	Unknown	Unknown	TX	N0	No	No	Yes	No	No/Unknown	No/Unknown
＞3	≥40	Female	White	Divorced	21~50	Unknown	Negative	Ishak 5-6	T3	N0	No	No	Yes	No	No/Unknown	Yes
≤3	≥40	Male	White	Divorced	≤20	Unknown	Positive	Unknown	T2	N0	No	No	Yes	No	No/Unknown	No/Unknown
≤3	≥40	Male	Others	Married	＞100	Unknown	Positive	Unknown	T3	N0	No	No	No	No	No/Unknown	No/Unknown
≤3	≥40	Male	Others	Married	≤20	Unknown	Negative	Unknown	T2	N0	No	No	Yes	No	No/Unknown	No/Unknown
≤3	≥40	Female	White	Widowed	21~50	Unknown	Unknown	Unknown	T2	NX	No	No	No	No	No/Unknown	No/Unknown
≤3	≥40	Male	Black	Unmarried	51~100	Grade III	Positive	Unknown	T4	N0	No	No	Yes	No	No/Unknown	No/Unknown
≤3	≥40	Female	White	Married	＞100	Unknown	Positive	Unknown	T3	N0	No	No	Yes	No	No/Unknown	Yes
≤3	≥40	Male	Others	Divorced	Unknown	Grade III	Positive	Unknown	TX	NX	No	No	Yes	No	No/Unknown	No/Unknown
＞3	≥40	Male	Black	Unmarried	≤20	Unknown	Negative	Unknown	T1	N0	No	No	Yes	Local tumor destruction	No/Unknown	No/Unknown
＞3	≥40	Male	White	Unmarried	≤20	Grade I	Negative	Ishak 5-6	T2	N1	Unknown	Unknown	Unknown	No	No/Unknown	No/Unknown
＞3	≥40	Male	White	Unmarried	21~50	Unknown	Positive	Unknown	T2	N0	No	No	No	No	No/Unknown	No/Unknown
＞3	≥40	Male	Black	Unmarried	Unknown	Unknown	Positive	Ishak 5-6	TX	N0	Yes	No	No	No	No/Unknown	No/Unknown
≤3	≥40	Male	White	Married	Unknown	Unknown	Negative	Unknown	TX	N0	No	No	Yes	No	No/Unknown	No/Unknown
[truncated: 3,212 more rows]
