# Supplementary material for: Risk Factors and Predictive Nomograms for Early Death of Patients with Advanced Hepatocellular Carcinoma: A Large Retrospective Study Based on the SEER Database
Source: Research Square preprint supplement (doi:10.21203/rs.3.rs-1415995/v1), 2022-03-22
Supplement: Supplementary file 4 [file 5ea0b556aedced50c7b1a3ea.xlsx]

## Sheet: Sheet1
Survival_months	Age	Gender	Race	Marital_status	Tumor_size_1	Histological_grade	AFP	Fibrosis_score	T_stage_2	Surgery_1	Radiotherapy	Chemotherapy
≤3	≥40	Female	White	Divorced	21~50	Unknown	Positive	Ishak 5-6	T3	No	No/Unknown	No/Unknown
＞3	≥40	Male	White	Unmarried	51~100	Unknown	Positive	Unknown	T3	No	No/Unknown	No/Unknown
＞3	≥40	Female	White	Married	21~50	Unknown	Positive	Ishak 5-6	T2	No	No/Unknown	Yes
＞3	≥40	Male	White	Married	21~50	Unknown	Negative	Unknown	T1	No	Yes	Yes
≤3	≥40	Female	White	Widowed	51~100	Grade II	Unknown	Unknown	T3	No	No/Unknown	No/Unknown
＞3	≥40	Male	White	Unknown	21~50	Unknown	Positive	Unknown	T2	No	No/Unknown	No/Unknown
＞3	≥40	Male	Others	Married	21~50	Grade II	Negative	Unknown	T2	No	No/Unknown	Yes
＞3	≥40	Male	White	Married	21~50	Grade III	Negative	Unknown	T1	No	No/Unknown	Yes
≤3	≥40	Male	Black	Married	Unknown	Unknown	Negative	Unknown	TX	No	No/Unknown	No/Unknown
＞3	≥40	Male	White	Married	51~100	Unknown	Positive	Unknown	T3	Local tumor destruction	No/Unknown	Yes
＞3	≥40	Male	White	Married	51~100	Unknown	Unknown	Unknown	T3	No	No/Unknown	Yes
≤3	≥40	Male	Black	Married	Unknown	Unknown	Positive	Unknown	T3	No	No/Unknown	No/Unknown
≤3	≥40	Male	Others	Unmarried	＞100	Unknown	Positive	Ishak 5-6	T3	No	No/Unknown	No/Unknown
＞3	≥40	Male	Black	Married	51~100	Unknown	Positive	Unknown	T3	No	No/Unknown	Yes
≤3	≥40	Male	Black	Married	51~100	Unknown	Positive	Unknown	T3	No	No/Unknown	No/Unknown
≤3	≥40	Male	White	Unmarried	＞100	Unknown	Positive	Unknown	T3	No	No/Unknown	No/Unknown
＞3	≥40	Female	Others	Widowed	Unknown	Unknown	Unknown	Unknown	TX	No	No/Unknown	Yes
＞3	≥40	Male	White	Unmarried	21~50	Unknown	Negative	Ishak 5-6	T1	No	No/Unknown	Yes
＞3	≥40	Female	Others	Widowed	＞100	Unknown	Unknown	Unknown	T1	No	No/Unknown	No/Unknown
＞3	≥40	Male	Others	Unmarried	＞100	Unknown	Negative	Unknown	T3	No	No/Unknown	Yes
＞3	≥40	Male	White	Married	＞100	Unknown	Positive	Unknown	T3	No	No/Unknown	Yes
＞3	≥40	Male	Black	Unmarried	＞100	Unknown	Positive	Unknown	T3	No	No/Unknown	Yes
＞3	≥40	Male	White	Unmarried	≤20	Grade III	Negative	Unknown	T1	Local tumor destruction	No/Unknown	No/Unknown
＞3	≥40	Female	White	Married	51~100	Unknown	Positive	Unknown	T3	No	No/Unknown	Yes
≤3	≥40	Male	White	Married	＞100	Unknown	Positive	Ishak 5-6	T3	No	No/Unknown	No/Unknown
＞3	≥40	Female	White	Married	51~100	Unknown	Positive	Unknown	T3	No	No/Unknown	Yes
＞3	≥40	Male	White	Married	21~50	Unknown	Positive	Unknown	T2	No	No/Unknown	Yes
≤3	≥40	Male	White	Unknown	＞100	Unknown	Positive	Unknown	T3	No	No/Unknown	No/Unknown
≤3	≥40	Male	Black	Separated	＞100	Unknown	Positive	Ishak 0-4	T3	No	No/Unknown	No/Unknown
＞3	≥40	Male	Others	Divorced	51~100	Unknown	Positive	Unknown	T4	No	No/Unknown	Yes
≤3	≥40	Male	White	Married	＞100	Unknown	Positive	Ishak 5-6	T3	No	No/Unknown	No/Unknown
≤3	≥40	Male	White	Married	21~50	Unknown	Positive	Ishak 5-6	T2	No	No/Unknown	No/Unknown
≤3	≥40	Male	Others	Married	21~50	Unknown	Positive	Ishak 5-6	T3	No	No/Unknown	Yes
≤3	≥40	Male	White	Married	＞100	Grade I	Positive	Unknown	T1	No	No/Unknown	No/Unknown
＞3	≥40	Male	Others	Divorced	Unknown	Unknown	Positive	Unknown	TX	Local tumor destruction	No/Unknown	No/Unknown
＞3	≥40	Male	Black	Married	21~50	Grade II	Positive	Unknown	T2	No	No/Unknown	Yes
≤3	≥40	Male	Others	Married	51~100	Grade I	Unknown	Unknown	T3	No	No/Unknown	No/Unknown
＞3	≥40	Male	Others	Unknown	51~100	Unknown	Positive	Ishak 5-6	T3	Local tumor destruction	No/Unknown	Yes
＞3	≥40	Male	Others	Unmarried	＞100	Unknown	Positive	Ishak 0-4	T4	No	No/Unknown	Yes
＞3	≥40	Male	White	Unmarried	21~50	Unknown	Unknown	Ishak 0-4	T1	No	No/Unknown	No/Unknown
＞3	≥40	Male	White	Divorced	51~100	Unknown	Positive	Ishak 5-6	T3	No	No/Unknown	Yes
＞3	≥40	Female	Others	Married	21~50	Unknown	Positive	Ishak 0-4	T3	No	No/Unknown	Yes
＞3	≥40	Male	Others	Divorced	51~100	Grade II	Positive	Ishak 5-6	T1	Wedge resection	No/Unknown	Yes
＞3	≥40	Male	White	Married	51~100	Unknown	Positive	Ishak 5-6	T3	No	No/Unknown	No/Unknown
＞3	≥40	Male	White	Widowed	Unknown	Unknown	Positive	Unknown	TX	No	No/Unknown	Yes
≤3	≥40	Male	White	Widowed	51~100	Unknown	Negative	Ishak 5-6	T3	No	No/Unknown	No/Unknown
≤3	≥40	Male	White	Divorced	51~100	Unknown	Positive	Unknown	T3	No	No/Unknown	No/Unknown
＞3	≥40	Male	White	Married	＞100	Unknown	Unknown	Unknown	T1	No	Yes	No/Unknown
≤3	≥40	Male	White	Widowed	Unknown	Unknown	Unknown	Unknown	TX	No	No/Unknown	No/Unknown
≤3	≥40	Male	White	Married	≤20	Unknown	Positive	Unknown	T2	No	No/Unknown	Yes
＞3	≥40	Male	White	Unmarried	＞100	Unknown	Positive	Ishak 5-6	T3	No	No/Unknown	No/Unknown
＞3	≥40	Male	Others	Married	21~50	Unknown	Negative	Ishak 5-6	T2	Local tumor destruction	No/Unknown	No/Unknown
＞3	≥40	Male	Black	Married	51~100	Grade I	Negative	Ishak 0-4	T1	Local tumor destruction	No/Unknown	Yes
＞3	≥40	Male	Others	Unmarried	＞100	Unknown	Positive	Ishak 0-4	T4	No	No/Unknown	Yes
≤3	≥40	Male	Black	Divorced	51~100	Unknown	Positive	Unknown	T3	No	No/Unknown	No/Unknown
＞3	≥40	Male	White	Divorced	21~50	Unknown	Positive	Ishak 5-6	T2	No	No/Unknown	Yes
≤3	≥40	Male	White	Unmarried	51~100	Unknown	Positive	Unknown	T1	No	No/Unknown	No/Unknown
≤3	≥40	Male	White	Unmarried	Unknown	Unknown	Positive	Unknown	T4	No	No/Unknown	No/Unknown
＞3	≥40	Male	White	Married	51~100	Unknown	Positive	Ishak 5-6	T3	Lobectomy	No/Unknown	Yes
＞3	≥40	Male	Others	Married	＞100	Unknown	Positive	Ishak 5-6	T3	No	No/Unknown	Yes
≤3	≥40	Female	White	Married	51~100	Unknown	Unknown	Unknown	T1	No	No/Unknown	No/Unknown
＞3	≥40	Male	Black	Divorced	＞100	Unknown	Positive	Unknown	T3	No	No/Unknown	Yes
≤3	≥40	Male	Others	Married	Unknown	Grade II	Positive	Ishak 0-4	TX	No	No/Unknown	Yes
＞3	≥40	Male	White	Married	21~50	Unknown	Positive	Unknown	T1	No	No/Unknown	Yes
≤3	≥40	Male	White	Married	51~100	Unknown	Positive	Ishak 5-6	T3	No	No/Unknown	No/Unknown
＞3	≥40	Male	White	Married	51~100	Unknown	Positive	Ishak 0-4	T3	No	No/Unknown	Yes
≤3	≥40	Male	Others	Married	51~100	Unknown	Positive	Unknown	T3	No	No/Unknown	No/Unknown
＞3	≥40	Female	White	Unmarried	51~100	Unknown	Positive	Unknown	T3	No	No/Unknown	Yes
＞3	≥40	Male	White	Unmarried	21~50	Unknown	Positive	Ishak 5-6	T2	No	No/Unknown	Yes
≤3	≥40	Male	White	Unmarried	21~50	Unknown	Positive	Unknown	T3	No	No/Unknown	No/Unknown
＞3	≥40	Female	Others	Married	＞100	Grade III	Positive	Unknown	T2	Lobectomy	No/Unknown	No/Unknown
≤3	≥40	Female	Others	Married	51~100	Unknown	Positive	Unknown	T4	No	No/Unknown	No/Unknown
≤3	≥40	Male	White	Unmarried	Unknown	Unknown	Positive	Unknown	T1	No	No/Unknown	No/Unknown
＞3	≥40	Male	White	Divorced	21~50	Unknown	Positive	Unknown	T1	No	No/Unknown	Yes
＞3	≥40	Male	White	Unmarried	21~50	Unknown	Positive	Ishak 5-6	T3	No	Yes	Yes
≤3	≥40	Male	Black	Unmarried	Unknown	Unknown	Positive	Unknown	T3	No	No/Unknown	No/Unknown
≤3	≥40	Male	White	Unknown	≤20	Unknown	Positive	Unknown	T1	No	No/Unknown	No/Unknown
＞3	≥40	Male	White	Married	＞100	Unknown	Positive	Unknown	T1	No	No/Unknown	Yes
＞3	≥40	Male	White	Married	51~100	Unknown	Positive	Ishak 5-6	T3	No	No/Unknown	Yes
＞3	≥40	Female	White	Widowed	21~50	Unknown	Positive	Ishak 5-6	T2	No	No/Unknown	No/Unknown
＞3	≥40	Male	White	Married	51~100	Unknown	Negative	Unknown	T3	No	No/Unknown	Yes
≤3	≥40	Male	Others	Married	51~100	Unknown	Positive	Ishak 5-6	T3	No	No/Unknown	No/Unknown
≤3	≥40	Male	White	Widowed	21~50	Unknown	Positive	Unknown	T3	No	No/Unknown	No/Unknown
＞3	≥40	Male	White	Married	Unknown	Grade I	Positive	Unknown	T1	No	No/Unknown	No/Unknown
＞3	≥40	Male	White	Married	＞100	Unknown	Positive	Unknown	T3	No	No/Unknown	Yes
＞3	≥40	Male	White	Married	＞100	Unknown	Positive	Unknown	T3	No	No/Unknown	Yes
≤3	≥40	Male	White	Divorced	Unknown	Unknown	Positive	Ishak 5-6	T3	No	No/Unknown	No/Unknown
＞3	≥40	Male	White	Married	≤20	Unknown	Positive	Unknown	T1	No	No/Unknown	No/Unknown
＞3	≥40	Male	White	Married	21~50	Unknown	Negative	Ishak 5-6	T2	Local tumor destruction	No/Unknown	No/Unknown
≤3	≥40	Male	White	Married	＞100	Unknown	Positive	Unknown	T1	No	No/Unknown	No/Unknown
≤3	≥40	Male	White	Married	51~100	Unknown	Positive	Unknown	T1	No	No/Unknown	Yes
＞3	≥40	Male	Black	Married	Unknown	Unknown	Unknown	Unknown	T3	No	No/Unknown	Yes
＞3	≥40	Male	White	Divorced	21~50	Unknown	Positive	Unknown	T3	No	No/Unknown	No/Unknown
＞3	≥40	Female	White	Married	21~50	Grade III	Positive	Unknown	T1	No	No/Unknown	No/Unknown
＞3	≥40	Male	White	Unknown	51~100	Unknown	Positive	Unknown	T1	No	No/Unknown	Yes
＞3	≥40	Male	White	Married	51~100	Grade II	Negative	Ishak 0-4	T3	Lobectomy	No/Unknown	No/Unknown
≤3	≥40	Female	White	Widowed	＞100	Unknown	Positive	Ishak 5-6	T3	No	No/Unknown	No/Unknown
＞3	≥40	Male	White	Unknown	21~50	Unknown	Negative	Ishak 5-6	T2	No	No/Unknown	Yes
＞3	≥40	Female	White	Divorced	51~100	Grade III	Positive	Unknown	T3	Lobectomy	No/Unknown	Yes
≤3	≥40	Female	White	Married	51~100	Grade II	Positive	Unknown	T1	No	No/Unknown	No/Unknown
＞3	≥40	Male	Black	Married	21~50	Grade III	Positive	Unknown	T2	No	No/Unknown	Yes
≤3	≥40	Male	White	Married	Unknown	Grade I	Unknown	Unknown	T2	No	No/Unknown	No/Unknown
≤3	≥40	Male	White	Married	Unknown	Unknown	Positive	Unknown	T1	No	No/Unknown	No/Unknown
≤3	≥40	Male	White	Unmarried	＞100	Unknown	Positive	Unknown	T1	No	No/Unknown	No/Unknown
≤3	≥40	Male	White	Unmarried	＞100	Unknown	Positive	Ishak 0-4	T3	No	No/Unknown	Yes
≤3	≥40	Male	White	Widowed	Unknown	Unknown	Positive	Unknown	T4	No	No/Unknown	No/Unknown
＞3	≥40	Male	White	Married	51~100	Grade I	Positive	Unknown	T3	No	No/Unknown	No/Unknown
＞3	≥40	Male	White	Married	51~100	Grade I	Negative	Unknown	T3	No	No/Unknown	Yes
≤3	≥40	Female	White	Divorced	＞100	Grade III	Positive	Ishak 0-4	T3	No	No/Unknown	No/Unknown
＞3	≥40	Male	White	Married	21~50	Unknown	Positive	Unknown	T1	No	No/Unknown	Yes
＞3	≥40	Male	Black	Married	51~100	Grade III	Positive	Ishak 0-4	T3	No	No/Unknown	Yes
≤3	≥40	Male	White	Married	Unknown	Grade I	Positive	Unknown	T4	No	No/Unknown	No/Unknown
＞3	≥40	Male	White	Divorced	21~50	Grade III	Negative	Unknown	T4	No	No/Unknown	Yes
≤3	≥40	Female	White	Married	51~100	Unknown	Unknown	Unknown	T3	No	No/Unknown	Yes
＞3	≥40	Male	White	Divorced	21~50	Grade II	Positive	Unknown	T2	No	No/Unknown	No/Unknown
≤3	≥40	Female	White	Widowed	51~100	Grade II	Unknown	Unknown	T3	No	No/Unknown	No/Unknown
≤3	≥40	Male	White	Unmarried	51~100	Unknown	Unknown	Unknown	T1	No	No/Unknown	No/Unknown
＞3	≥40	Male	White	Married	21~50	Unknown	Unknown	Unknown	T2	Local tumor destruction	No/Unknown	Yes
＞3	≥40	Male	Others	Married	＞100	Grade III	Positive	Unknown	T2	Lobectomy	No/Unknown	No/Unknown
＞3	≥40	Male	White	Married	Unknown	Unknown	Negative	Unknown	T3	No	No/Unknown	Yes
＞3	≥40	Male	White	Divorced	21~50	Grade II	Positive	Ishak 5-6	T2	No	Yes	Yes
≤3	≥40	Male	White	Unmarried	21~50	Grade III	Positive	Unknown	T2	No	No/Unknown	No/Unknown
＞3	≥40	Male	White	Married	21~50	Unknown	Positive	Unknown	T3	No	No/Unknown	No/Unknown
≤3	≥40	Male	Black	Unmarried	＞100	Unknown	Positive	Unknown	T3	No	Yes	No/Unknown
＞3	≥40	Female	White	Unmarried	Unknown	Unknown	Positive	Unknown	TX	No	No/Unknown	Yes
＞3	≥40	Male	White	Unmarried	21~50	Unknown	Positive	Unknown	T1	Local tumor destruction	No/Unknown	No/Unknown
≤3	≥40	Male	White	Unmarried	Unknown	Unknown	Positive	Unknown	T2	No	No/Unknown	No/Unknown
＞3	≥40	Male	White	Married	51~100	Grade II	Unknown	Unknown	T3	No	No/Unknown	Yes
＞3	≥40	Male	White	Unknown	51~100	Unknown	Negative	Unknown	T4	Local tumor destruction	No/Unknown	Yes
＞3	≥40	Male	White	Married	21~50	Unknown	Unknown	Unknown	T1	Local tumor destruction	No/Unknown	Yes
≤3	≥40	Male	White	Married	Unknown	Grade III	Positive	Unknown	T3	No	No/Unknown	Yes
≤3	≥40	Male	White	Unmarried	51~100	Unknown	Unknown	Unknown	T3	No	No/Unknown	No/Unknown
≤3	≥40	Male	White	Widowed	＞100	Unknown	Unknown	Unknown	T3	No	No/Unknown	No/Unknown
≤3	≥40	Male	White	Divorced	51~100	Unknown	Unknown	Unknown	T3	No	No/Unknown	Yes
＞3	≥40	Male	White	Unmarried	21~50	Unknown	Positive	Unknown	T2	Local tumor destruction	No/Unknown	Yes
≤3	≥40	Male	White	Married	51~100	Grade II	Positive	Unknown	T4	No	No/Unknown	No/Unknown
＞3	≥40	Male	White	Unmarried	21~50	Grade III	Positive	Unknown	T3	No	No/Unknown	Yes
≤3	≥40	Male	White	Unmarried	Unknown	Unknown	Positive	Unknown	TX	No	No/Unknown	Yes
＞3	≥40	Male	Black	Unmarried	51~100	Unknown	Positive	Unknown	T3	No	No/Unknown	No/Unknown
≤3	≥40	Male	White	Divorced	Unknown	Unknown	Positive	Unknown	T3	No	No/Unknown	No/Unknown
＞3	≥40	Female	White	Married	21~50	Unknown	Positive	Unknown	T2	No	No/Unknown	No/Unknown
＞3	≥40	Male	White	Married	51~100	Grade II	Positive	Unknown	T3	Lobectomy	No/Unknown	Yes
≤3	≥40	Male	White	Divorced	Unknown	Unknown	Positive	Unknown	T4	No	No/Unknown	Yes
＞3	≥40	Male	White	Unmarried	51~100	Unknown	Positive	Unknown	T3	No	No/Unknown	Yes
≤3	≥40	Male	White	Unmarried	＞100	Grade II	Unknown	Unknown	T3	No	No/Unknown	No/Unknown
＞3	≥40	Male	White	Unmarried	51~100	Grade III	Positive	Unknown	T1	No	No/Unknown	Yes
≤3	≥40	Male	White	Married	Unknown	Unknown	Unknown	Unknown	T1	No	No/Unknown	Yes
≤3	≥40	Female	White	Married	21~50	Grade III	Unknown	Ishak 5-6	T2	No	No/Unknown	No/Unknown
≤3	≥40	Male	White	Unmarried	＞100	Grade II	Positive	Unknown	T1	No	No/Unknown	Yes
≤3	≥40	Male	White	Married	51~100	Grade II	Positive	Unknown	T3	No	No/Unknown	No/Unknown
≤3	≥40	Female	White	Widowed	51~100	Grade III	Negative	Unknown	T1	No	No/Unknown	No/Unknown
≤3	≥40	Male	White	Married	Unknown	Unknown	Positive	Unknown	TX	No	No/Unknown	No/Unknown
＞3	≥40	Male	Black	Married	Unknown	Grade I	Positive	Unknown	T3	No	Yes	Yes
＞3	≥40	Female	White	Widowed	Unknown	Unknown	Positive	Unknown	TX	No	No/Unknown	No/Unknown
＞3	≥40	Male	White	Divorced	Unknown	Unknown	Positive	Unknown	TX	No	No/Unknown	Yes
＞3	≥40	Female	White	Married	51~100	Unknown	Positive	Unknown	T3	No	No/Unknown	Yes
＞3	≥40	Male	White	Unmarried	21~50	Unknown	Positive	Unknown	T3	No	No/Unknown	Yes
＞3	≥40	Male	White	Unmarried	＞100	Grade II	Positive	Unknown	T3	No	No/Unknown	No/Unknown
≤3	≥40	Male	White	Married	21~50	Grade III	Positive	Unknown	T2	No	No/Unknown	No/Unknown
≤3	≥40	Male	White	Unmarried	＞100	Unknown	Positive	Unknown	T4	No	No/Unknown	No/Unknown
＞3	≥40	Male	Others	Married	≤20	Unknown	Positive	Unknown	T4	No	No/Unknown	Yes
≤3	≥40	Male	White	Divorced	＞100	Unknown	Positive	Ishak 5-6	T3	No	No/Unknown	Yes
≤3	≥40	Male	White	Married	51~100	Unknown	Positive	Unknown	T3	No	Yes	Yes
≤3	≥40	Male	White	Widowed	51~100	Grade II	Negative	Unknown	T4	No	No/Unknown	Yes
＞3	≥40	Male	White	Unmarried	＞100	Grade II	Positive	Unknown	T3	No	No/Unknown	Yes
＞3	≥40	Male	Black	Divorced	51~100	Grade III	Unknown	Unknown	T3	Lobectomy	No/Unknown	No/Unknown
＞3	≥40	Male	White	Widowed	＞100	Unknown	Positive	Ishak 5-6	T3	No	No/Unknown	Yes
＞3	≥40	Female	White	Married	51~100	Unknown	Positive	Ishak 5-6	T1	Local tumor destruction	No/Unknown	Yes
≤3	≥40	Male	White	Unmarried	51~100	Unknown	Positive	Unknown	T3	No	No/Unknown	Yes
≤3	≥40	Male	Black	Married	≤20	Unknown	Positive	Unknown	T4	No	No/Unknown	Yes
＞3	≥40	Female	White	Married	21~50	Unknown	Positive	Unknown	T3	No	No/Unknown	Yes
＞3	≥40	Male	White	Married	51~100	Grade II	Positive	Unknown	T1	No	No/Unknown	Yes
≤3	≥40	Male	White	Divorced	51~100	Unknown	Positive	Unknown	T3	No	No/Unknown	No/Unknown
≤3	≥40	Male	White	Divorced	Unknown	Unknown	Positive	Ishak 5-6	T3	No	No/Unknown	No/Unknown
＞3	≥40	Male	White	Widowed	21~50	Grade II	Unknown	Ishak 5-6	T1	Wedge resection	No/Unknown	No/Unknown
＞3	≥40	Male	White	Married	＞100	Grade III	Positive	Unknown	T2	No	No/Unknown	Yes
≤3	≥40	Female	White	Widowed	51~100	Grade II	Positive	Unknown	T1	No	No/Unknown	No/Unknown
＞3	≥40	Female	White	Widowed	21~50	Unknown	Positive	Ishak 5-6	T2	No	No/Unknown	Yes
≤3	≥40	Male	Others	Married	＞100	Unknown	Negative	Unknown	T1	No	No/Unknown	No/Unknown
≤3	≥40	Male	White	Widowed	21~50	Unknown	Negative	Unknown	T1	No	No/Unknown	No/Unknown
≤3	≥40	Male	Others	Married	51~100	Unknown	Unknown	Unknown	T3	No	No/Unknown	No/Unknown
＞3	≥40	Male	White	Widowed	＞100	Unknown	Positive	Unknown	T4	No	No/Unknown	No/Unknown
≤3	≥40	Male	White	Married	51~100	Grade III	Positive	Ishak 5-6	T3	No	No/Unknown	No/Unknown
≤3	≥40	Male	Black	Unmarried	21~50	Unknown	Positive	Unknown	T2	No	No/Unknown	No/Unknown
＞3	≥40	Male	Black	Divorced	＞100	Unknown	Negative	Ishak 0-4	T3	No	No/Unknown	Yes
＞3	≥40	Male	Black	Widowed	＞100	Unknown	Positive	Unknown	T3	No	No/Unknown	Yes
≤3	≥40	Female	Black	Divorced	≤20	Grade I	Positive	Unknown	T3	No	No/Unknown	Yes
＞3	≥40	Male	White	Divorced	21~50	Grade I	Negative	Unknown	T2	Local tumor destruction	No/Unknown	Yes
≤3	≥40	Female	White	Divorced	51~100	Unknown	Negative	Ishak 5-6	T3	No	No/Unknown	No/Unknown
＞3	≥40	Male	White	Married	51~100	Unknown	Positive	Unknown	T1	No	No/Unknown	No/Unknown
≤3	≥40	Male	White	Unknown	51~100	Unknown	Positive	Unknown	T3	No	No/Unknown	Yes
≤3	≥40	Male	Black	Married	51~100	Unknown	Positive	Unknown	T3	No	No/Unknown	No/Unknown
＞3	≥40	Male	White	Married	＞100	Grade I	Unknown	Ishak 5-6	T3	No	Yes	Yes
＞3	≥40	Male	Black	Divorced	51~100	Unknown	Positive	Unknown	T3	No	Yes	Yes
＞3	≥40	Female	White	Divorced	＞100	Grade I	Positive	Unknown	T4	No	No/Unknown	Yes
≤3	≥40	Male	White	Widowed	51~100	Unknown	Positive	Unknown	T3	No	No/Unknown	Yes
＞3	≥40	Male	White	Divorced	51~100	Grade II	Positive	Unknown	T3	No	No/Unknown	No/Unknown
≤3	≥40	Male	White	Unmarried	51~100	Unknown	Positive	Ishak 5-6	T3	No	No/Unknown	Yes
＞3	≥40	Male	White	Unmarried	21~50	Grade I	Positive	Ishak 5-6	T2	No	Yes	Yes
≤3	≥40	Male	White	Married	51~100	Grade II	Positive	Unknown	T3	No	No/Unknown	Yes
＞3	≥40	Male	White	Divorced	51~100	Unknown	Positive	Unknown	T3	No	No/Unknown	Yes
＞3	≥40	Male	White	Married	21~50	Grade I	Positive	Unknown	T2	No	No/Unknown	Yes
＞3	≥40	Female	White	Married	Unknown	Unknown	Positive	Ishak 5-6	TX	No	No/Unknown	Yes
＞3	≥40	Male	Black	Married	＞100	Grade II	Positive	Unknown	T1	Lobectomy	No/Unknown	No/Unknown
＞3	≥40	Male	Black	Divorced	51~100	Unknown	Positive	Unknown	T3	No	No/Unknown	Yes
＞3	≥40	Male	Black	Married	51~100	Unknown	Positive	Unknown	T3	No	No/Unknown	Yes
＞3	≥40	Male	White	Divorced	51~100	Unknown	Positive	Unknown	T3	No	Yes	Yes
＞3	≥40	Male	White	Married	51~100	Unknown	Positive	Ishak 5-6	T3	No	Yes	No/Unknown
≤3	≥40	Male	White	Married	51~100	Grade II	Unknown	Unknown	T1	No	No/Unknown	No/Unknown
≤3	≥40	Male	White	Unmarried	51~100	Grade II	Positive	Unknown	T4	No	No/Unknown	No/Unknown
＞3	≥40	Female	White	Married	21~50	Unknown	Positive	Ishak 5-6	T1	No	No/Unknown	Yes
＞3	≥40	Male	Black	Unmarried	Unknown	Unknown	Unknown	Unknown	T4	No	No/Unknown	Yes
＞3	≥40	Male	White	Divorced	Unknown	Grade II	Positive	Ishak 0-4	T3	No	No/Unknown	No/Unknown
＞3	≥40	Male	Black	Widowed	51~100	Grade I	Negative	Unknown	T1	No	No/Unknown	Yes
≤3	≥40	Male	Black	Married	Unknown	Unknown	Positive	Ishak 5-6	TX	No	No/Unknown	No/Unknown
＞3	≥40	Male	White	Married	21~50	Unknown	Positive	Unknown	T1	Local tumor destruction	No/Unknown	No/Unknown
≤3	≥40	Male	Black	Unmarried	Unknown	Unknown	Positive	Ishak 5-6	T1	No	No/Unknown	No/Unknown
≤3	≥40	Male	Black	Unmarried	51~100	Unknown	Positive	Ishak 5-6	T1	No	No/Unknown	No/Unknown
≤3	≥40	Male	White	Married	21~50	Grade I	Positive	Unknown	T4	No	No/Unknown	No/Unknown
≤3	≥40	Male	Black	Divorced	Unknown	Unknown	Positive	Unknown	TX	No	No/Unknown	No/Unknown
＞3	≥40	Male	White	Married	51~100	Grade I	Positive	Unknown	T3	No	No/Unknown	No/Unknown
≤3	≥40	Male	White	Married	21~50	Grade III	Positive	Ishak 5-6	T2	No	No/Unknown	No/Unknown
＞3	≥40	Male	Black	Separated	Unknown	Unknown	Positive	Ishak 5-6	TX	No	Yes	No/Unknown
＞3	≥40	Male	White	Unmarried	51~100	Unknown	Positive	Ishak 5-6	T3	No	Yes	Yes
＞3	≥40	Male	White	Married	Unknown	Unknown	Positive	Unknown	T4	No	Yes	Yes
＞3	≥40	Male	Black	Unmarried	51~100	Grade II	Positive	Ishak 0-4	T3	Wedge resection	Yes	No/Unknown
＞3	≥40	Male	Black	Unmarried	21~50	Unknown	Positive	Ishak 0-4	T3	No	No/Unknown	Yes
≤3	≥40	Male	Black	Unmarried	＞100	Unknown	Positive	Ishak 5-6	T3	No	No/Unknown	Yes
＞3	≥40	Female	Black	Unmarried	21~50	Grade I	Positive	Unknown	T3	No	No/Unknown	No/Unknown
≤3	≥40	Male	White	Divorced	21~50	Unknown	Positive	Ishak 5-6	T2	No	No/Unknown	No/Unknown
≤3	≥40	Male	Black	Unmarried	51~100	Unknown	Positive	Ishak 5-6	T3	No	No/Unknown	No/Unknown
＞3	≥40	Male	White	Married	Unknown	Grade II	Positive	Unknown	T1	No	No/Unknown	Yes
＞3	≥40	Male	Black	Divorced	＞100	Grade III	Positive	Unknown	T3	No	No/Unknown	Yes
≤3	≥40	Male	Black	Divorced	51~100	Grade III	Positive	Ishak 5-6	T3	No	No/Unknown	No/Unknown
≤3	≥40	Male	White	Divorced	51~100	Unknown	Positive	Ishak 5-6	T3	No	No/Unknown	No/Unknown
＞3	≥40	Male	Black	Married	51~100	Grade III	Positive	Unknown	T3	No	Yes	Yes
＞3	≥40	Male	Black	Unmarried	21~50	Unknown	Positive	Unknown	T2	No	No/Unknown	Yes
≤3	≥40	Male	White	Unknown	51~100	Unknown	Positive	Unknown	T3	No	No/Unknown	Yes
＞3	≥40	Male	Black	Unmarried	21~50	Grade II	Positive	Ishak 5-6	T2	No	No/Unknown	Yes
≤3	≥40	Male	White	Married	51~100	Grade III	Negative	Ishak 5-6	T1	No	No/Unknown	No/Unknown
≤3	≥40	Male	White	Married	51~100	Unknown	Positive	Ishak 5-6	T1	No	No/Unknown	No/Unknown
≤3	≥40	Male	White	Unmarried	51~100	Unknown	Positive	Ishak 5-6	T3	No	No/Unknown	No/Unknown
＞3	≥40	Female	Black	Widowed	51~100	Grade I	Negative	Unknown	T1	No	Yes	Yes
＞3	≥40	Male	Black	Unmarried	51~100	Unknown	Positive	Ishak 5-6	T3	No	No/Unknown	No/Unknown
≤3	≥40	Male	White	Unknown	21~50	Grade I	Negative	Unknown	T3	No	No/Unknown	No/Unknown
≤3	≥40	Male	White	Married	Unknown	Unknown	Unknown	Unknown	TX	No	No/Unknown	No/Unknown
＞3	≥40	Male	White	Unmarried	21~50	Unknown	Positive	Unknown	T2	Local tumor destruction	No/Unknown	Yes
≤3	≥40	Male	Black	Unknown	＞100	Grade III	Positive	Ishak 5-6	T3	No	No/Unknown	No/Unknown
＞3	≥40	Male	White	Married	51~100	Unknown	Positive	Unknown	T3	No	No/Unknown	No/Unknown
＞3	≥40	Male	Others	Married	＞100	Grade II	Negative	Unknown	T3	No	No/Unknown	Yes
≤3	≥40	Female	Others	Unmarried	51~100	Unknown	Negative	Unknown	T3	No	No/Unknown	No/Unknown
≤3	≥40	Male	Others	Married	51~100	Grade III	Positive	Unknown	T3	No	No/Unknown	Yes
≤3	≥40	Male	White	Unknown	Unknown	Unknown	Positive	Unknown	T3	No	No/Unknown	No/Unknown
＞3	≥40	Male	Others	Married	51~100	Unknown	Unknown	Unknown	T2	No	No/Unknown	Yes
≤3	≥40	Female	Others	Widowed	＞100	Unknown	Unknown	Unknown	T2	No	No/Unknown	No/Unknown
＞3	≥40	Male	Others	Married	Unknown	Grade II	Positive	Unknown	T3	No	No/Unknown	Yes
≤3	≥40	Male	Others	Married	＞100	Grade I	Positive	Unknown	T4	No	No/Unknown	No/Unknown
≤3	≥40	Female	White	Widowed	51~100	Unknown	Positive	Unknown	T3	No	No/Unknown	No/Unknown
≤3	≥40	Male	Others	Divorced	51~100	Unknown	Positive	Unknown	T3	No	No/Unknown	No/Unknown
≤3	≥40	Male	Others	Unknown	21~50	Unknown	Positive	Unknown	T4	No	No/Unknown	No/Unknown
≤3	≥40	Male	Others	Unmarried	＞100	Unknown	Positive	Unknown	T2	No	No/Unknown	No/Unknown
≤3	≥40	Male	White	Married	51~100	Unknown	Positive	Unknown	T1	No	No/Unknown	Yes
≤3	≥40	Male	Others	Unknown	51~100	Grade II	Positive	Unknown	T3	No	No/Unknown	Yes
≤3	≥40	Male	Others	Married	＞100	Unknown	Positive	Unknown	T3	No	No/Unknown	Yes
＞3	≥40	Male	White	Unmarried	21~50	Unknown	Unknown	Unknown	T1	No	No/Unknown	No/Unknown
≤3	≥40	Male	Others	Married	51~100	Unknown	Positive	Ishak 5-6	T3	No	No/Unknown	No/Unknown
＞3	≥40	Female	White	Married	21~50	Grade III	Positive	Unknown	T3	No	No/Unknown	No/Unknown
＞3	≥40	Female	Others	Widowed	51~100	Unknown	Positive	Unknown	T1	No	No/Unknown	No/Unknown
＞3	≥40	Female	White	Widowed	21~50	Grade I	Positive	Unknown	T1	No	No/Unknown	Yes
≤3	≥40	Male	White	Married	Unknown	Unknown	Positive	Unknown	TX	No	No/Unknown	No/Unknown
≤3	≥40	Female	White	Married	Unknown	Grade I	Positive	Unknown	T3	No	No/Unknown	No/Unknown
＞3	≥40	Male	White	Divorced	51~100	Unknown	Positive	Ishak 5-6	T3	No	No/Unknown	No/Unknown
＞3	≥40	Male	White	Married	21~50	Unknown	Positive	Unknown	T2	No	No/Unknown	Yes
＞3	≥40	Female	White	Widowed	51~100	Unknown	Negative	Unknown	T1	No	No/Unknown	No/Unknown
＞3	≥40	Male	White	Married	≤20	Unknown	Unknown	Ishak 5-6	T1	No	Yes	Yes
＞3	≥40	Male	White	Married	Unknown	Unknown	Positive	Unknown	TX	No	No/Unknown	Yes
≤3	≥40	Female	White	Divorced	＞100	Unknown	Positive	Unknown	T3	No	No/Unknown	Yes
≤3	≥40	Male	White	Divorced	51~100	Unknown	Positive	Unknown	T4	No	No/Unknown	No/Unknown
≤3	≥40	Female	White	Widowed	51~100	Unknown	Positive	Ishak 5-6	T3	No	No/Unknown	Yes
＞3	≥40	Male	Black	Unknown	21~50	Unknown	Unknown	Unknown	T1	No	No/Unknown	No/Unknown
＞3	≥40	Male	Others	Married	51~100	Unknown	Positive	Ishak 5-6	T1	No	No/Unknown	Yes
＞3	≥40	Male	White	Widowed	21~50	Unknown	Negative	Unknown	T2	No	No/Unknown	Yes
≤3	≥40	Female	Black	Divorced	21~50	Unknown	Positive	Unknown	T3	No	No/Unknown	No/Unknown
＞3	≥40	Male	White	Unmarried	Unknown	Unknown	Positive	Unknown	TX	No	No/Unknown	No/Unknown
＞3	≥40	Male	White	Married	Unknown	Unknown	Positive	Unknown	T3	No	No/Unknown	Yes
≤3	≥40	Male	White	Unmarried	＞100	Grade II	Positive	Unknown	T1	No	No/Unknown	No/Unknown
＞3	≥40	Male	White	Married	21~50	Grade I	Negative	Unknown	T2	No	Yes	Yes
＞3	≥40	Male	White	Married	21~50	Grade I	Unknown	Unknown	T1	No	No/Unknown	No/Unknown
≤3	≥40	Male	White	Married	51~100	Unknown	Unknown	Unknown	T3	No	No/Unknown	No/Unknown
≤3	≥40	Male	White	Divorced	Unknown	Unknown	Positive	Unknown	T3	No	No/Unknown	No/Unknown
＞3	≥40	Male	White	Married	51~100	Grade III	Positive	Unknown	T3	No	No/Unknown	Yes
≤3	≥40	Female	White	Unmarried	Unknown	Grade III	Unknown	Unknown	TX	No	No/Unknown	No/Unknown
＞3	＜40	Female	White	Married	51~100	Grade II	Negative	Unknown	T2	Lobectomy	No/Unknown	No/Unknown
＞3	≥40	Male	White	Married	51~100	Unknown	Unknown	Unknown	T1	No	No/Unknown	No/Unknown
＞3	≥40	Male	White	Divorced	51~100	Unknown	Positive	Unknown	T3	No	Yes	Yes
＞3	≥40	Male	White	Unmarried	＞100	Unknown	Positive	Unknown	T4	No	No/Unknown	Yes
＞3	≥40	Female	Others	Married	21~50	Unknown	Unknown	Unknown	T1	No	No/Unknown	No/Unknown
≤3	≥40	Female	White	Unmarried	51~100	Unknown	Positive	Unknown	T3	No	No/Unknown	Yes
＞3	≥40	Male	White	Married	＞100	Grade III	Positive	Unknown	T3	No	Yes	Yes
＞3	≥40	Female	White	Widowed	≤20	Unknown	Positive	Unknown	T2	No	No/Unknown	No/Unknown
≤3	≥40	Male	Others	Unknown	Unknown	Unknown	Unknown	Unknown	TX	No	No/Unknown	No/Unknown
＞3	≥40	Male	White	Married	21~50	Grade II	Unknown	Unknown	T1	No	No/Unknown	Yes
≤3	≥40	Male	White	Married	Unknown	Grade III	Positive	Unknown	T1	No	No/Unknown	Yes
＞3	≥40	Male	White	Separated	Unknown	Grade I	Unknown	Unknown	T1	No	No/Unknown	No/Unknown
＞3	≥40	Female	White	Widowed	51~100	Unknown	Positive	Unknown	T3	No	No/Unknown	No/Unknown
＞3	≥40	Female	White	Widowed	＞100	Grade III	Positive	Ishak 5-6	T4	No	No/Unknown	Yes
≤3	≥40	Male	White	Married	Unknown	Grade I	Negative	Unknown	T3	No	No/Unknown	No/Unknown
＞3	≥40	Male	White	Married	51~100	Grade II	Negative	Unknown	TX	No	No/Unknown	No/Unknown
＞3	≥40	Female	Others	Unmarried	51~100	Unknown	Positive	Unknown	T3	No	No/Unknown	No/Unknown
≤3	≥40	Male	White	Unmarried	51~100	Unknown	Positive	Unknown	T3	No	No/Unknown	Yes
≤3	≥40	Male	White	Married	51~100	Grade II	Positive	Unknown	T3	No	No/Unknown	Yes
≤3	≥40	Male	White	Married	Unknown	Unknown	Positive	Unknown	TX	No	No/Unknown	Yes
＞3	≥40	Male	White	Married	21~50	Unknown	Positive	Ishak 5-6	T2	No	No/Unknown	Yes
≤3	≥40	Male	White	Divorced	Unknown	Unknown	Positive	Unknown	T3	No	No/Unknown	No/Unknown
＞3	≥40	Male	Black	Married	51~100	Grade II	Positive	Unknown	T3	No	No/Unknown	Yes
＞3	≥40	Male	White	Married	＞100	Unknown	Positive	Unknown	T3	No	No/Unknown	No/Unknown
＞3	≥40	Male	White	Married	21~50	Grade II	Negative	Ishak 5-6	T2	No	No/Unknown	No/Unknown
＞3	≥40	Male	White	Unknown	51~100	Grade I	Positive	Ishak 5-6	T3	No	No/Unknown	Yes
＞3	≥40	Male	Others	Widowed	51~100	Grade III	Unknown	Unknown	T2	No	Yes	No/Unknown
＞3	≥40	Male	Others	Married	Unknown	Unknown	Unknown	Unknown	TX	No	No/Unknown	Yes
＞3	＜40	Male	White	Unmarried	＞100	Grade II	Negative	Unknown	T2	Lobectomy	No/Unknown	No/Unknown
≤3	≥40	Male	White	Unmarried	51~100	Unknown	Positive	Unknown	T3	No	No/Unknown	No/Unknown
＞3	≥40	Female	Others	Widowed	21~50	Grade II	Positive	Ishak 0-4	T2	No	No/Unknown	Yes
＞3	≥40	Female	White	Unmarried	21~50	Grade II	Positive	Unknown	T1	No	No/Unknown	Yes
≤3	≥40	Female	White	Unmarried	＞100	Grade II	Positive	Ishak 0-4	T3	No	No/Unknown	Yes
≤3	≥40	Male	Others	Married	＞100	Unknown	Positive	Ishak 5-6	T3	No	No/Unknown	Yes
＞3	≥40	Female	Others	Married	51~100	Unknown	Unknown	Unknown	TX	No	No/Unknown	Yes
＞3	≥40	Female	White	Unknown	21~50	Unknown	Positive	Unknown	T1	No	Yes	No/Unknown
＞3	≥40	Male	White	Married	Unknown	Unknown	Positive	Ishak 5-6	T3	No	No/Unknown	No/Unknown
＞3	≥40	Male	Others	Married	51~100	Grade II	Positive	Ishak 5-6	T3	No	No/Unknown	Yes
≤3	≥40	Male	White	Divorced	＞100	Unknown	Negative	Unknown	T3	No	No/Unknown	No/Unknown
≤3	≥40	Male	Others	Married	Unknown	Unknown	Positive	Unknown	TX	No	No/Unknown	No/Unknown
≤3	≥40	Male	White	Married	＞100	Unknown	Positive	Ishak 5-6	T1	No	No/Unknown	Yes
≤3	≥40	Male	White	Unmarried	Unknown	Unknown	Unknown	Unknown	T2	No	No/Unknown	Yes
＞3	≥40	Female	Black	Widowed	21~50	Unknown	Positive	Unknown	T1	Local tumor destruction	No/Unknown	No/Unknown
≤3	≥40	Male	White	Married	21~50	Grade II	Unknown	Ishak 5-6	T2	No	No/Unknown	Yes
≤3	≥40	Male	White	Married	＞100	Grade II	Positive	Unknown	T3	No	No/Unknown	Yes
≤3	≥40	Male	Others	Married	51~100	Grade II	Positive	Unknown	T3	No	No/Unknown	Yes
≤3	≥40	Male	White	Divorced	＞100	Unknown	Positive	Unknown	T3	No	No/Unknown	No/Unknown
≤3	≥40	Male	White	Unmarried	Unknown	Unknown	Positive	Ishak 5-6	TX	No	No/Unknown	No/Unknown
≤3	≥40	Female	White	Divorced	Unknown	Unknown	Positive	Ishak 5-6	T4	No	No/Unknown	No/Unknown
≤3	≥40	Male	White	Divorced	51~100	Unknown	Negative	Unknown	T1	No	No/Unknown	No/Unknown
≤3	≥40	Male	White	Unmarried	51~100	Grade II	Positive	Ishak 5-6	T3	No	No/Unknown	Yes
＞3	≥40	Male	Others	Separated	51~100	Unknown	Negative	Ishak 5-6	T3	No	No/Unknown	Yes
＞3	≥40	Male	White	Married	＞100	Grade II	Negative	Unknown	T4	No	Yes	Yes
≤3	≥40	Male	White	Married	＞100	Grade II	Negative	Ishak 5-6	T3	No	No/Unknown	Yes
≤3	≥40	Female	White	Divorced	21~50	Unknown	Positive	Ishak 5-6	T2	No	No/Unknown	No/Unknown
≤3	≥40	Male	White	Divorced	21~50	Unknown	Positive	Unknown	T1	No	No/Unknown	No/Unknown
＞3	≥40	Male	White	Married	21~50	Unknown	Positive	Unknown	T2	No	No/Unknown	Yes
≤3	≥40	Female	White	Married	51~100	Grade II	Positive	Unknown	T3	No	No/Unknown	No/Unknown
≤3	≥40	Male	Others	Separated	51~100	Grade II	Positive	Ishak 5-6	T4	No	No/Unknown	Yes
＞3	≥40	Male	Black	Divorced	Unknown	Unknown	Unknown	Unknown	TX	No	No/Unknown	No/Unknown
＞3	≥40	Female	White	Divorced	51~100	Unknown	Positive	Ishak 5-6	T1	No	No/Unknown	Yes
≤3	≥40	Male	White	Married	Unknown	Unknown	Positive	Unknown	T3	No	No/Unknown	Yes
≤3	≥40	Male	Black	Unknown	51~100	Unknown	Positive	Ishak 5-6	T3	No	No/Unknown	No/Unknown
＞3	≥40	Female	White	Married	＞100	Grade II	Positive	Ishak 0-4	T4	No	No/Unknown	No/Unknown
≤3	≥40	Male	White	Married	＞100	Unknown	Negative	Ishak 5-6	T3	No	No/Unknown	No/Unknown
＞3	≥40	Male	White	Unmarried	51~100	Grade III	Unknown	Ishak 5-6	T1	No	Yes	Yes
＞3	≥40	Male	White	Married	21~50	Unknown	Positive	Ishak 5-6	T2	No	Yes	Yes
≤3	≥40	Male	Others	Married	Unknown	Unknown	Unknown	Ishak 5-6	TX	No	No/Unknown	No/Unknown
＞3	≥40	Male	White	Married	Unknown	Unknown	Positive	Ishak 5-6	T3	No	Yes	No/Unknown
＞3	≥40	Male	White	Unmarried	21~50	Unknown	Negative	Ishak 0-4	T3	No	Yes	Yes
≤3	≥40	Male	White	Married	51~100	Unknown	Positive	Unknown	T3	No	No/Unknown	No/Unknown
＞3	≥40	Male	Others	Married	51~100	Unknown	Positive	Unknown	T3	No	No/Unknown	No/Unknown
＞3	≥40	Female	White	Widowed	51~100	Unknown	Negative	Ishak 5-6	T1	No	No/Unknown	No/Unknown
＞3	≥40	Male	White	Unmarried	21~50	Unknown	Negative	Unknown	T2	No	No/Unknown	Yes
≤3	≥40	Female	White	Married	＞100	Unknown	Positive	Ishak 0-4	T3	No	No/Unknown	No/Unknown
＞3	≥40	Male	White	Married	Unknown	Unknown	Positive	Ishak 5-6	TX	No	No/Unknown	Yes
≤3	≥40	Male	White	Unmarried	Unknown	Unknown	Positive	Ishak 5-6	TX	No	No/Unknown	No/Unknown
≤3	≥40	Male	White	Married	＞100	Unknown	Positive	Ishak 5-6	T4	No	No/Unknown	No/Unknown
≤3	≥40	Male	Others	Married	＞100	Unknown	Positive	Unknown	T4	No	No/Unknown	Yes
≤3	≥40	Male	Black	Unmarried	21~50	Unknown	Positive	Unknown	T4	No	No/Unknown	No/Unknown
≤3	≥40	Male	White	Married	51~100	Grade III	Positive	Unknown	T3	No	No/Unknown	Yes
＞3	≥40	Male	White	Unmarried	51~100	Unknown	Negative	Unknown	T3	No	Yes	No/Unknown
＞3	≥40	Male	White	Divorced	51~100	Unknown	Positive	Unknown	T3	No	No/Unknown	No/Unknown
＞3	≥40	Male	White	Married	51~100	Unknown	Positive	Unknown	T3	No	Yes	Yes
＞3	≥40	Male	Others	Married	21~50	Unknown	Positive	Unknown	T1	No	Yes	No/Unknown
＞3	＜40	Female	White	Separated	51~100	Grade III	Positive	Unknown	T1	Lobectomy	No/Unknown	No/Unknown
≤3	≥40	Female	Others	Married	21~50	Unknown	Positive	Unknown	T2	No	No/Unknown	No/Unknown
≤3	≥40	Male	White	Married	21~50	Unknown	Positive	Unknown	TX	No	No/Unknown	No/Unknown
＞3	＜40	Female	White	Unmarried	＞100	Unknown	Negative	Unknown	T3	Lobectomy	No/Unknown	No/Unknown
≤3	≥40	Male	White	Divorced	51~100	Unknown	Positive	Unknown	T3	No	No/Unknown	No/Unknown
≤3	≥40	Male	Others	Divorced	＞100	Unknown	Positive	Unknown	T4	No	No/Unknown	No/Unknown
＞3	≥40	Male	Others	Married	＞100	Grade II	Positive	Unknown	T3	No	No/Unknown	Yes
≤3	≥40	Female	White	Separated	51~100	Grade III	Positive	Unknown	T3	No	No/Unknown	No/Unknown
≤3	≥40	Male	White	Unmarried	21~50	Grade II	Positive	Unknown	T3	No	No/Unknown	Yes
≤3	≥40	Male	White	Married	21~50	Unknown	Positive	Unknown	T2	No	No/Unknown	No/Unknown
＞3	≥40	Male	White	Unmarried	51~100	Unknown	Negative	Unknown	T3	Local tumor destruction	Yes	No/Unknown
≤3	≥40	Male	Others	Divorced	51~100	Unknown	Positive	Unknown	T3	No	No/Unknown	No/Unknown
≤3	≥40	Male	White	Unmarried	51~100	Unknown	Positive	Unknown	T4	No	No/Unknown	No/Unknown
＞3	≥40	Male	White	Unmarried	＞100	Unknown	Positive	Unknown	T3	No	Yes	No/Unknown
≤3	≥40	Male	White	Married	21~50	Unknown	Positive	Unknown	T2	No	No/Unknown	No/Unknown
≤3	≥40	Male	White	Unmarried	21~50	Unknown	Positive	Unknown	T3	No	No/Unknown	Yes
＞3	≥40	Male	White	Unmarried	21~50	Unknown	Positive	Unknown	T3	No	No/Unknown	Yes
≤3	≥40	Female	White	Divorced	51~100	Grade III	Unknown	Unknown	T3	No	No/Unknown	No/Unknown
≤3	≥40	Male	White	Married	21~50	Unknown	Positive	Unknown	T3	No	No/Unknown	No/Unknown
＞3	≥40	Female	White	Married	21~50	Unknown	Negative	Unknown	T4	No	Yes	No/Unknown
＞3	≥40	Female	White	Unmarried	51~100	Unknown	Positive	Unknown	T3	No	No/Unknown	No/Unknown
＞3	＜40	Male	White	Unmarried	51~100	Grade I	Positive	Unknown	T1	Lobectomy	No/Unknown	No/Unknown
≤3	≥40	Male	Others	Unmarried	＞100	Unknown	Positive	Unknown	T3	No	No/Unknown	No/Unknown
＞3	≥40	Male	White	Unmarried	51~100	Unknown	Positive	Unknown	T4	No	No/Unknown	No/Unknown
≤3	≥40	Male	Black	Married	21~50	Unknown	Unknown	Unknown	T3	No	No/Unknown	No/Unknown
＞3	≥40	Male	White	Married	Unknown	Grade II	Unknown	Unknown	TX	No	No/Unknown	No/Unknown
＞3	≥40	Male	White	Divorced	21~50	Unknown	Positive	Unknown	T2	Local tumor destruction	No/Unknown	No/Unknown
≤3	≥40	Male	White	Married	＞100	Grade II	Positive	Unknown	T3	No	No/Unknown	No/Unknown
≤3	≥40	Female	White	Married	51~100	Unknown	Unknown	Unknown	T4	Wedge resection	No/Unknown	No/Unknown
＞3	≥40	Male	White	Married	21~50	Grade II	Negative	Unknown	T2	No	No/Unknown	No/Unknown
＞3	≥40	Male	White	Married	51~100	Unknown	Negative	Ishak 5-6	T3	No	No/Unknown	Yes
＞3	≥40	Male	White	Married	51~100	Unknown	Negative	Unknown	T3	No	No/Unknown	No/Unknown
＞3	≥40	Male	White	Divorced	Unknown	Unknown	Positive	Ishak 5-6	T3	No	No/Unknown	No/Unknown
＞3	≥40	Male	White	Married	51~100	Grade II	Negative	Unknown	T3	No	No/Unknown	Yes
≤3	≥40	Female	White	Unknown	＞100	Unknown	Negative	Unknown	T1	No	No/Unknown	No/Unknown
≤3	≥40	Female	White	Divorced	51~100	Unknown	Positive	Unknown	T3	No	No/Unknown	Yes
≤3	≥40	Female	White	Married	Unknown	Unknown	Positive	Unknown	T1	No	No/Unknown	No/Unknown
≤3	≥40	Male	White	Married	51~100	Unknown	Positive	Unknown	T3	No	No/Unknown	No/Unknown
≤3	≥40	Female	White	Married	51~100	Grade I	Unknown	Unknown	T1	No	No/Unknown	No/Unknown
≤3	≥40	Female	White	Married	51~100	Unknown	Unknown	Unknown	T3	No	No/Unknown	Yes
≤3	≥40	Female	White	Widowed	21~50	Unknown	Unknown	Unknown	T1	No	No/Unknown	No/Unknown
＞3	≥40	Male	White	Married	51~100	Grade III	Unknown	Unknown	T3	No	No/Unknown	No/Unknown
＞3	≥40	Male	Others	Married	51~100	Unknown	Positive	Unknown	T4	No	No/Unknown	Yes
＞3	≥40	Female	Others	Married	＞100	Unknown	Positive	Unknown	T3	No	No/Unknown	Yes
≤3	≥40	Male	White	Divorced	51~100	Grade II	Negative	Unknown	T3	No	No/Unknown	No/Unknown
≤3	≥40	Male	White	Unmarried	Unknown	Grade II	Positive	Unknown	TX	No	No/Unknown	No/Unknown
≤3	≥40	Female	White	Married	＞100	Unknown	Positive	Unknown	T3	No	No/Unknown	No/Unknown
＞3	≥40	Male	White	Divorced	＞100	Unknown	Positive	Ishak 5-6	T3	No	Yes	Yes
≤3	≥40	Male	White	Married	＞100	Unknown	Positive	Unknown	T4	No	No/Unknown	No/Unknown
＞3	≥40	Male	White	Divorced	51~100	Unknown	Unknown	Unknown	T3	No	No/Unknown	No/Unknown
＞3	≥40	Female	White	Married	21~50	Unknown	Unknown	Unknown	T2	No	No/Unknown	No/Unknown
≤3	≥40	Male	Black	Unmarried	＞100	Unknown	Positive	Ishak 5-6	T3	No	No/Unknown	Yes
＞3	≥40	Female	Black	Married	51~100	Grade I	Negative	Unknown	T4	Wedge resection	No/Unknown	Yes
≤3	≥40	Female	White	Widowed	51~100	Grade III	Positive	Unknown	T1	No	No/Unknown	No/Unknown
≤3	≥40	Male	Black	Married	51~100	Unknown	Positive	Ishak 5-6	T3	No	No/Unknown	Yes
≤3	≥40	Male	White	Married	＞100	Unknown	Unknown	Unknown	T1	No	No/Unknown	No/Unknown
≤3	≥40	Male	Black	Married	51~100	Grade III	Positive	Unknown	T3	No	No/Unknown	No/Unknown
≤3	≥40	Male	White	Married	＞100	Grade III	Positive	Unknown	T3	No	No/Unknown	No/Unknown
≤3	≥40	Male	White	Widowed	51~100	Grade II	Positive	Unknown	T2	No	No/Unknown	No/Unknown
≤3	≥40	Male	Black	Married	21~50	Unknown	Positive	Ishak 5-6	T3	No	No/Unknown	No/Unknown
＞3	≥40	Male	White	Married	51~100	Unknown	Unknown	Unknown	T3	No	No/Unknown	Yes
＞3	≥40	Female	Black	Unmarried	21~50	Unknown	Positive	Unknown	T2	No	No/Unknown	Yes
≤3	≥40	Male	White	Married	≤20	Unknown	Positive	Unknown	T2	No	No/Unknown	No/Unknown
＞3	≥40	Male	Black	Married	51~100	Unknown	Positive	Ishak 5-6	T3	No	No/Unknown	Yes
≤3	≥40	Male	Black	Unmarried	51~100	Unknown	Positive	Unknown	T3	No	No/Unknown	No/Unknown
≤3	≥40	Male	White	Divorced	21~50	Unknown	Positive	Ishak 5-6	T3	No	No/Unknown	No/Unknown
＞3	≥40	Male	Black	Married	51~100	Unknown	Negative	Unknown	T3	No	No/Unknown	Yes
≤3	≥40	Male	Black	Married	51~100	Grade III	Positive	Unknown	T3	No	No/Unknown	Yes
＞3	≥40	Male	Others	Married	≤20	Unknown	Positive	Unknown	T1	No	No/Unknown	No/Unknown
＞3	≥40	Male	Black	Married	51~100	Unknown	Positive	Ishak 5-6	T2	No	No/Unknown	Yes
＞3	≥40	Male	Black	Separated	51~100	Unknown	Positive	Unknown	T2	No	No/Unknown	Yes
≤3	≥40	Male	Black	Divorced	＞100	Unknown	Positive	Unknown	T3	No	No/Unknown	No/Unknown
≤3	≥40	Male	Black	Married	＞100	Grade II	Unknown	Unknown	T3	No	No/Unknown	Yes
＞3	≥40	Male	Black	Divorced	21~50	Unknown	Positive	Ishak 5-6	T2	No	No/Unknown	Yes
≤3	≥40	Male	Black	Divorced	51~100	Unknown	Positive	Unknown	T3	No	No/Unknown	Yes
≤3	≥40	Male	White	Married	51~100	Unknown	Positive	Ishak 5-6	T3	No	No/Unknown	No/Unknown
＞3	≥40	Male	White	Married	＞100	Unknown	Negative	Unknown	T2	No	No/Unknown	No/Unknown
≤3	≥40	Female	Black	Widowed	51~100	Grade II	Positive	Unknown	T3	No	No/Unknown	No/Unknown
≤3	≥40	Male	Black	Unmarried	51~100	Unknown	Positive	Unknown	T3	No	No/Unknown	Yes
＞3	≥40	Male	Black	Divorced	≤20	Grade I	Positive	Unknown	T2	No	No/Unknown	Yes
＞3	≥40	Male	Black	Divorced	51~100	Unknown	Positive	Ishak 5-6	T3	No	No/Unknown	No/Unknown
＞3	≥40	Male	Black	Unknown	＞100	Unknown	Positive	Unknown	T3	No	No/Unknown	No/Unknown
＞3	≥40	Female	Black	Unmarried	51~100	Unknown	Negative	Unknown	T3	No	No/Unknown	Yes
＞3	≥40	Male	Others	Married	51~100	Unknown	Negative	Unknown	T3	No	Yes	No/Unknown
≤3	≥40	Male	Black	Unmarried	＞100	Unknown	Negative	Unknown	T3	No	No/Unknown	No/Unknown
≤3	≥40	Male	Others	Married	21~50	Grade I	Positive	Unknown	T3	No	No/Unknown	No/Unknown
＞3	≥40	Male	Black	Married	＞100	Grade II	Unknown	Unknown	T3	No	No/Unknown	Yes
＞3	≥40	Male	Black	Unmarried	21~50	Unknown	Positive	Ishak 0-4	T2	No	No/Unknown	No/Unknown
＞3	≥40	Male	Black	Unmarried	Unknown	Unknown	Unknown	Unknown	T1	No	No/Unknown	No/Unknown
≤3	≥40	Male	Black	Unmarried	Unknown	Unknown	Positive	Unknown	T1	No	No/Unknown	No/Unknown
≤3	≥40	Female	Black	Unmarried	Unknown	Unknown	Positive	Unknown	T3	No	No/Unknown	No/Unknown
≤3	≥40	Male	White	Unknown	51~100	Unknown	Positive	Unknown	T4	No	No/Unknown	No/Unknown
≤3	≥40	Male	Black	Widowed	21~50	Unknown	Unknown	Unknown	T1	No	No/Unknown	No/Unknown
＞3	≥40	Male	Black	Married	≤20	Unknown	Positive	Ishak 5-6	T2	Local tumor destruction	No/Unknown	No/Unknown
≤3	≥40	Female	Black	Unmarried	51~100	Unknown	Positive	Unknown	T3	No	No/Unknown	No/Unknown
≤3	≥40	Male	White	Divorced	51~100	Unknown	Unknown	Unknown	T3	No	No/Unknown	No/Unknown
≤3	≥40	Male	Black	Divorced	＞100	Unknown	Positive	Ishak 5-6	T3	No	No/Unknown	Yes
≤3	≥40	Male	Black	Unmarried	＞100	Unknown	Positive	Unknown	T3	No	No/Unknown	No/Unknown
＞3	≥40	Male	Black	Married	Unknown	Unknown	Positive	Unknown	T4	No	No/Unknown	Yes
＞3	≥40	Male	White	Widowed	＞100	Unknown	Positive	Ishak 5-6	T1	No	No/Unknown	No/Unknown
＞3	≥40	Female	Black	Unmarried	51~100	Unknown	Positive	Unknown	T2	No	Yes	No/Unknown
＞3	＜40	Female	White	Unmarried	＞100	Unknown	Unknown	Unknown	T3	No	No/Unknown	Yes
＞3	＜40	Female	White	Unmarried	＞100	Grade II	Positive	Unknown	T3	No	No/Unknown	Yes
＞3	≥40	Male	Black	Divorced	51~100	Grade III	Positive	Ishak 5-6	T3	No	No/Unknown	No/Unknown
＞3	≥40	Male	Others	Unknown	＞100	Unknown	Positive	Ishak 0-4	T4	No	No/Unknown	No/Unknown
＞3	≥40	Male	Others	Unknown	≤20	Unknown	Negative	Unknown	T2	No	No/Unknown	Yes
≤3	≥40	Male	White	Married	21~50	Grade II	Positive	Unknown	T1	No	No/Unknown	Yes
≤3	≥40	Female	White	Widowed	51~100	Grade III	Positive	Ishak 0-4	T3	No	No/Unknown	No/Unknown
＞3	≥40	Female	White	Married	21~50	Grade II	Positive	Unknown	T2	No	No/Unknown	No/Unknown
＞3	≥40	Male	White	Married	21~50	Unknown	Positive	Unknown	T1	No	No/Unknown	Yes
＞3	≥40	Male	White	Married	21~50	Unknown	Positive	Unknown	T2	No	No/Unknown	Yes
≤3	≥40	Male	White	Married	21~50	Unknown	Unknown	Unknown	T3	No	No/Unknown	No/Unknown
＞3	≥40	Male	White	Unmarried	21~50	Unknown	Positive	Unknown	T1	No	No/Unknown	Yes
≤3	≥40	Male	White	Unmarried	＞100	Unknown	Positive	Ishak 5-6	T3	No	No/Unknown	No/Unknown
≤3	≥40	Male	White	Unmarried	51~100	Grade III	Positive	Unknown	T3	No	No/Unknown	No/Unknown
＞3	＜40	Female	White	Unmarried	＞100	Grade II	Negative	Ishak 0-4	T1	Lobectomy	No/Unknown	Yes
＞3	≥40	Male	White	Married	＞100	Unknown	Negative	Ishak 5-6	T3	No	No/Unknown	Yes
＞3	≥40	Male	Others	Married	＞100	Unknown	Positive	Ishak 5-6	T3	No	No/Unknown	Yes
≤3	≥40	Female	Others	Divorced	51~100	Unknown	Positive	Unknown	T3	No	No/Unknown	No/Unknown
＞3	≥40	Male	Others	Married	51~100	Grade III	Positive	Unknown	T3	No	No/Unknown	No/Unknown
＞3	≥40	Male	Black	Unmarried	51~100	Unknown	Positive	Ishak 0-4	T3	No	No/Unknown	Yes
＞3	≥40	Male	White	Divorced	51~100	Unknown	Positive	Ishak 5-6	T3	No	No/Unknown	Yes
≤3	≥40	Male	White	Unmarried	＞100	Unknown	Negative	Ishak 5-6	T3	No	No/Unknown	No/Unknown
＞3	≥40	Male	White	Divorced	51~100	Grade II	Unknown	Unknown	T2	No	No/Unknown	Yes
＞3	≥40	Male	White	Unknown	＞100	Grade II	Negative	Ishak 5-6	T4	Local tumor destruction	Yes	Yes
＞3	≥40	Male	White	Married	＞100	Unknown	Positive	Unknown	T3	No	No/Unknown	Yes
＞3	≥40	Male	White	Married	51~100	Unknown	Negative	Unknown	T3	No	No/Unknown	Yes
≤3	≥40	Male	Others	Married	＞100	Unknown	Positive	Ishak 5-6	T3	No	No/Unknown	No/Unknown
＞3	≥40	Male	Black	Unmarried	≤20	Unknown	Positive	Ishak 5-6	T2	No	No/Unknown	Yes
＞3	≥40	Female	Others	Widowed	21~50	Unknown	Negative	Ishak 5-6	T1	No	Yes	Yes
＞3	≥40	Male	White	Married	21~50	Unknown	Positive	Unknown	T2	No	Yes	Yes
＞3	≥40	Male	White	Unmarried	51~100	Unknown	Positive	Unknown	T1	No	No/Unknown	No/Unknown
≤3	≥40	Male	Others	Separated	＞100	Unknown	Positive	Ishak 0-4	T1	No	No/Unknown	Yes
＞3	≥40	Male	White	Married	21~50	Unknown	Positive	Unknown	T1	No	No/Unknown	Yes
＞3	≥40	Male	White	Married	21~50	Unknown	Negative	Unknown	T3	No	No/Unknown	No/Unknown
≤3	≥40	Male	White	Unmarried	51~100	Unknown	Unknown	Ishak 5-6	T1	No	No/Unknown	No/Unknown
＞3	≥40	Male	Others	Unmarried	51~100	Unknown	Unknown	Unknown	T3	No	No/Unknown	No/Unknown
≤3	≥40	Male	White	Married	Unknown	Unknown	Unknown	Unknown	TX	No	No/Unknown	No/Unknown
＞3	≥40	Male	Others	Married	51~100	Unknown	Positive	Unknown	T3	No	No/Unknown	Yes
≤3	≥40	Male	Others	Unmarried	51~100	Unknown	Positive	Ishak 5-6	T3	No	No/Unknown	No/Unknown
≤3	≥40	Male	White	Married	51~100	Unknown	Unknown	Ishak 5-6	T4	No	No/Unknown	No/Unknown
＞3	≥40	Male	White	Married	21~50	Unknown	Positive	Unknown	T2	No	No/Unknown	Yes
＞3	≥40	Male	White	Married	21~50	Grade II	Negative	Ishak 5-6	T2	Wedge resection	No/Unknown	Yes
＞3	≥40	Female	White	Divorced	51~100	Grade II	Negative	Ishak 5-6	T3	Lobectomy	No/Unknown	Yes
＞3	≥40	Male	White	Divorced	51~100	Unknown	Positive	Ishak 5-6	T3	No	No/Unknown	No/Unknown
≤3	≥40	Female	White	Married	＞100	Unknown	Positive	Unknown	T3	No	No/Unknown	No/Unknown
＞3	≥40	Female	Others	Divorced	＞100	Unknown	Positive	Unknown	T3	No	No/Unknown	Yes
＞3	≥40	Male	Others	Divorced	21~50	Unknown	Unknown	Unknown	T2	No	Yes	Yes
≤3	≥40	Female	White	Unmarried	51~100	Unknown	Positive	Ishak 5-6	T3	No	No/Unknown	No/Unknown
≤3	≥40	Male	White	Unknown	51~100	Grade III	Positive	Unknown	T2	No	No/Unknown	No/Unknown
＞3	≥40	Male	Others	Unmarried	≤20	Unknown	Positive	Ishak 5-6	T2	No	No/Unknown	No/Unknown
＞3	≥40	Male	Others	Married	＞100	Grade II	Positive	Ishak 0-4	T3	No	No/Unknown	Yes
＞3	≥40	Male	Others	Married	Unknown	Unknown	Negative	Unknown	TX	No	Yes	No/Unknown
≤3	≥40	Male	White	Unmarried	21~50	Unknown	Positive	Ishak 5-6	T2	No	No/Unknown	No/Unknown
≤3	≥40	Female	White	Unmarried	Unknown	Unknown	Positive	Ishak 5-6	T3	No	No/Unknown	Yes
＞3	≥40	Female	White	Married	＞100	Unknown	Positive	Ishak 0-4	T2	No	Yes	No/Unknown
≤3	≥40	Male	White	Divorced	21~50	Unknown	Positive	Unknown	T3	No	No/Unknown	No/Unknown
≤3	≥40	Male	White	Divorced	51~100	Unknown	Positive	Ishak 5-6	T4	No	No/Unknown	No/Unknown
＞3	≥40	Female	White	Married	Unknown	Unknown	Positive	Unknown	TX	No	Yes	Yes
＞3	≥40	Male	White	Married	51~100	Unknown	Positive	Ishak 5-6	T3	No	Yes	Yes
＞3	≥40	Male	Others	Married	＞100	Unknown	Positive	Ishak 0-4	T1	No	No/Unknown	Yes
≤3	≥40	Male	White	Married	21~50	Unknown	Positive	Ishak 5-6	T3	No	No/Unknown	Yes
≤3	≥40	Male	White	Married	21~50	Unknown	Positive	Ishak 5-6	T2	No	No/Unknown	Yes
＞3	≥40	Male	White	Unmarried	≤20	Unknown	Positive	Unknown	T2	No	No/Unknown	Yes
＞3	≥40	Male	White	Divorced	21~50	Unknown	Positive	Unknown	T3	No	No/Unknown	Yes
≤3	≥40	Male	White	Widowed	＞100	Unknown	Positive	Unknown	T3	No	No/Unknown	No/Unknown
＞3	≥40	Male	Black	Married	51~100	Unknown	Positive	Unknown	T3	No	No/Unknown	Yes
＞3	≥40	Male	White	Unmarried	＞100	Unknown	Positive	Unknown	T3	No	No/Unknown	No/Unknown
＞3	≥40	Female	White	Unmarried	51~100	Unknown	Positive	Unknown	T3	No	No/Unknown	No/Unknown
＞3	≥40	Male	Black	Married	51~100	Unknown	Positive	Unknown	T1	No	Yes	No/Unknown
＞3	≥40	Female	White	Divorced	Unknown	Unknown	Unknown	Unknown	TX	No	No/Unknown	No/Unknown
＞3	≥40	Male	Others	Married	51~100	Unknown	Positive	Unknown	T3	No	No/Unknown	Yes
＞3	≥40	Male	White	Married	21~50	Grade III	Negative	Unknown	T1	No	No/Unknown	No/Unknown
≤3	≥40	Male	White	Married	51~100	Grade II	Positive	Unknown	T2	No	No/Unknown	No/Unknown
≤3	≥40	Male	White	Separated	51~100	Unknown	Positive	Ishak 5-6	T3	No	No/Unknown	No/Unknown
≤3	≥40	Male	White	Married	Unknown	Grade I	Positive	Unknown	T1	No	No/Unknown	No/Unknown
＞3	≥40	Female	White	Married	51~100	Grade II	Positive	Unknown	T1	Wedge resection	No/Unknown	Yes
≤3	≥40	Male	Others	Unmarried	Unknown	Unknown	Positive	Unknown	TX	No	No/Unknown	No/Unknown
≤3	≥40	Male	White	Married	＞100	Grade II	Negative	Unknown	T1	No	No/Unknown	No/Unknown
≤3	≥40	Female	White	Married	＞100	Grade III	Positive	Unknown	T4	No	No/Unknown	No/Unknown
＞3	≥40	Male	White	Married	21~50	Grade I	Negative	Unknown	T2	No	No/Unknown	Yes
≤3	≥40	Male	Black	Married	Unknown	Unknown	Positive	Unknown	TX	No	No/Unknown	Yes
＞3	≥40	Male	White	Married	51~100	Unknown	Positive	Unknown	T1	No	No/Unknown	Yes
＞3	≥40	Male	White	Married	51~100	Unknown	Negative	Ishak 5-6	T3	No	No/Unknown	Yes
＞3	≥40	Male	Others	Married	＞100	Unknown	Positive	Unknown	T1	No	No/Unknown	Yes
＞3	≥40	Female	Others	Widowed	≤20	Grade III	Positive	Unknown	T2	No	No/Unknown	Yes
＞3	≥40	Male	White	Unmarried	Unknown	Unknown	Positive	Unknown	T1	No	No/Unknown	Yes
≤3	≥40	Male	White	Widowed	Unknown	Unknown	Positive	Unknown	TX	No	No/Unknown	No/Unknown
≤3	≥40	Male	White	Married	51~100	Unknown	Unknown	Unknown	T3	No	No/Unknown	No/Unknown
＞3	≥40	Female	Others	Unknown	Unknown	Grade II	Positive	Unknown	T3	No	No/Unknown	No/Unknown
≤3	≥40	Male	White	Unmarried	＞100	Unknown	Positive	Ishak 5-6	T1	No	No/Unknown	Yes
＞3	≥40	Male	White	Divorced	51~100	Unknown	Positive	Ishak 5-6	T3	No	No/Unknown	Yes
＞3	≥40	Male	White	Married	21~50	Unknown	Positive	Unknown	T1	No	Yes	No/Unknown
＞3	≥40	Male	White	Married	51~100	Grade III	Positive	Unknown	T3	Wedge resection	No/Unknown	Yes
≤3	≥40	Male	Others	Divorced	＞100	Unknown	Positive	Unknown	T3	No	No/Unknown	Yes
≤3	≥40	Male	White	Unmarried	51~100	Unknown	Unknown	Unknown	T3	No	No/Unknown	No/Unknown
＞3	≥40	Male	White	Unmarried	21~50	Unknown	Positive	Unknown	T2	No	No/Unknown	Yes
＞3	≥40	Male	Others	Separated	21~50	Unknown	Negative	Unknown	T2	Lobectomy	No/Unknown	Yes
＞3	≥40	Male	White	Married	＞100	Grade II	Positive	Unknown	T3	Lobectomy	No/Unknown	No/Unknown
＞3	≥40	Female	White	Married	51~100	Unknown	Negative	Unknown	T1	No	No/Unknown	No/Unknown
＞3	≥40	Male	Black	Married	21~50	Unknown	Positive	Unknown	T2	No	No/Unknown	Yes
＞3	≥40	Male	White	Unmarried	21~50	Unknown	Positive	Unknown	T3	No	Yes	No/Unknown
＞3	≥40	Male	White	Divorced	51~100	Grade II	Positive	Ishak 0-4	T3	Lobectomy	No/Unknown	Yes
≤3	≥40	Male	White	Married	＞100	Unknown	Positive	Unknown	T3	No	No/Unknown	No/Unknown
＞3	≥40	Male	Others	Married	Unknown	Unknown	Unknown	Unknown	T1	No	No/Unknown	No/Unknown
≤3	≥40	Male	Others	Unmarried	Unknown	Unknown	Positive	Unknown	T4	No	No/Unknown	No/Unknown
＞3	≥40	Male	White	Married	51~100	Unknown	Unknown	Ishak 5-6	T3	No	Yes	No/Unknown
＞3	≥40	Male	White	Married	≤20	Unknown	Positive	Ishak 5-6	T1	No	No/Unknown	No/Unknown
≤3	≥40	Male	Others	Married	51~100	Unknown	Positive	Ishak 0-4	T3	No	No/Unknown	Yes
＞3	≥40	Male	White	Married	21~50	Unknown	Positive	Ishak 5-6	T2	No	No/Unknown	Yes
≤3	≥40	Male	Others	Married	＞100	Unknown	Unknown	Unknown	TX	No	No/Unknown	No/Unknown
≤3	≥40	Male	Others	Married	Unknown	Grade II	Positive	Ishak 5-6	TX	No	No/Unknown	Yes
≤3	≥40	Male	White	Married	Unknown	Grade III	Positive	Unknown	T4	No	No/Unknown	Yes
≤3	≥40	Male	White	Divorced	51~100	Unknown	Positive	Unknown	T3	No	No/Unknown	No/Unknown
＞3	≥40	Male	White	Unmarried	21~50	Grade III	Unknown	Unknown	T1	No	No/Unknown	No/Unknown
＞3	≥40	Male	White	Married	21~50	Grade I	Positive	Unknown	T1	No	No/Unknown	Yes
＞3	≥40	Male	Others	Married	51~100	Grade II	Positive	Unknown	T3	No	No/Unknown	Yes
＞3	≥40	Male	White	Separated	Unknown	Unknown	Positive	Unknown	TX	No	No/Unknown	Yes
≤3	≥40	Female	White	Unmarried	21~50	Grade I	Positive	Unknown	T2	No	No/Unknown	No/Unknown
＞3	≥40	Male	White	Unmarried	51~100	Unknown	Positive	Unknown	T3	No	No/Unknown	No/Unknown
≤3	＜40	Male	White	Unmarried	Unknown	Grade III	Positive	Unknown	T3	No	No/Unknown	No/Unknown
＞3	≥40	Female	White	Widowed	51~100	Grade III	Unknown	Unknown	T3	No	No/Unknown	Yes
≤3	≥40	Male	Others	Married	＞100	Grade II	Positive	Unknown	T3	No	No/Unknown	No/Unknown
≤3	≥40	Male	White	Married	51~100	Unknown	Positive	Unknown	T2	No	No/Unknown	Yes
＞3	≥40	Female	White	Unmarried	21~50	Unknown	Positive	Unknown	T1	No	No/Unknown	Yes
≤3	≥40	Female	White	Unmarried	51~100	Grade III	Unknown	Unknown	T3	No	No/Unknown	No/Unknown
＞3	≥40	Male	Black	Unmarried	＞100	Grade II	Positive	Unknown	T1	No	No/Unknown	No/Unknown
＞3	≥40	Female	White	Divorced	≤20	Grade II	Positive	Unknown	TX	No	No/Unknown	Yes
＞3	≥40	Male	White	Married	51~100	Unknown	Positive	Ishak 0-4	T1	No	No/Unknown	Yes
≤3	≥40	Female	White	Unmarried	51~100	Unknown	Positive	Unknown	T3	No	No/Unknown	No/Unknown
＞3	≥40	Female	White	Widowed	51~100	Unknown	Unknown	Unknown	TX	No	No/Unknown	Yes
≤3	≥40	Male	White	Unmarried	≤20	Unknown	Unknown	Unknown	T3	No	No/Unknown	No/Unknown
≤3	≥40	Female	Black	Unmarried	Unknown	Unknown	Positive	Unknown	TX	No	No/Unknown	No/Unknown
＞3	≥40	Female	White	Widowed	21~50	Unknown	Negative	Unknown	T1	No	No/Unknown	No/Unknown
＞3	≥40	Male	White	Divorced	Unknown	Unknown	Positive	Ishak 5-6	T3	No	No/Unknown	Yes
＞3	≥40	Female	White	Married	＞100	Grade III	Positive	Ishak 0-4	T3	Lobectomy	No/Unknown	Yes
≤3	≥40	Male	White	Married	51~100	Grade II	Positive	Unknown	T3	No	No/Unknown	No/Unknown
＞3	≥40	Male	Others	Married	21~50	Unknown	Positive	Unknown	T3	No	No/Unknown	Yes
＞3	≥40	Female	Black	Unknown	Unknown	Grade III	Unknown	Unknown	T4	No	No/Unknown	Yes
≤3	≥40	Male	Others	Divorced	Unknown	Grade III	Positive	Unknown	T3	No	No/Unknown	No/Unknown
＞3	≥40	Male	White	Married	51~100	Unknown	Positive	Unknown	T1	No	No/Unknown	No/Unknown
＞3	≥40	Female	White	Married	21~50	Unknown	Positive	Unknown	T3	No	No/Unknown	Yes
≤3	≥40	Male	White	Divorced	＞100	Unknown	Positive	Ishak 5-6	T3	No	No/Unknown	No/Unknown
＞3	≥40	Female	White	Married	21~50	Grade III	Positive	Unknown	T1	Wedge resection	No/Unknown	No/Unknown
≤3	≥40	Female	Others	Married	51~100	Grade IV	Positive	Unknown	T3	No	No/Unknown	No/Unknown
＞3	≥40	Male	Others	Married	51~100	Grade II	Negative	Unknown	T3	No	No/Unknown	Yes
≤3	≥40	Female	White	Widowed	51~100	Unknown	Positive	Unknown	T3	No	No/Unknown	No/Unknown
≤3	≥40	Female	Black	Married	21~50	Grade I	Positive	Unknown	T2	No	No/Unknown	No/Unknown
≤3	≥40	Female	White	Married	Unknown	Unknown	Positive	Unknown	TX	No	No/Unknown	No/Unknown
＞3	≥40	Male	White	Married	＞100	Grade II	Positive	Unknown	T4	No	No/Unknown	Yes
＞3	≥40	Male	White	Unmarried	21~50	Unknown	Negative	Unknown	T2	No	No/Unknown	Yes
≤3	≥40	Male	Others	Married	Unknown	Grade III	Positive	Unknown	T3	No	No/Unknown	No/Unknown
＞3	≥40	Male	White	Married	＞100	Unknown	Unknown	Unknown	T3	No	No/Unknown	Yes
＞3	≥40	Male	Others	Married	51~100	Unknown	Positive	Unknown	T3	No	No/Unknown	Yes
＞3	≥40	Male	White	Married	51~100	Grade III	Negative	Unknown	T3	Lobectomy	No/Unknown	No/Unknown
＞3	≥40	Male	White	Unmarried	＞100	Unknown	Negative	Unknown	T4	No	No/Unknown	Yes
＞3	≥40	Male	Others	Married	21~50	Unknown	Positive	Unknown	T1	No	No/Unknown	Yes
≤3	≥40	Male	White	Divorced	51~100	Unknown	Positive	Unknown	T4	No	No/Unknown	No/Unknown
≤3	≥40	Male	Black	Unmarried	＞100	Unknown	Positive	Unknown	T4	No	No/Unknown	No/Unknown
＞3	≥40	Male	Black	Unmarried	51~100	Grade I	Positive	Unknown	T3	No	No/Unknown	No/Unknown
≤3	≥40	Male	Others	Unmarried	＞100	Grade II	Positive	Unknown	T4	No	No/Unknown	No/Unknown
≤3	≥40	Male	Black	Married	＞100	Unknown	Positive	Ishak 5-6	T3	No	No/Unknown	No/Unknown
＞3	≥40	Male	Others	Married	51~100	Grade I	Positive	Unknown	T3	Local tumor destruction	No/Unknown	No/Unknown
＞3	≥40	Male	Others	Married	21~50	Grade I	Negative	Unknown	T2	Lobectomy	No/Unknown	Yes
≤3	≥40	Male	White	Married	＞100	Grade III	Negative	Unknown	T1	Lobectomy	No/Unknown	No/Unknown
≤3	≥40	Male	White	Married	Unknown	Unknown	Positive	Unknown	T4	No	No/Unknown	No/Unknown
≤3	≥40	Male	White	Married	＞100	Unknown	Positive	Unknown	T3	No	No/Unknown	Yes
＞3	≥40	Male	Others	Married	21~50	Unknown	Unknown	Unknown	T1	No	No/Unknown	No/Unknown
≤3	≥40	Male	White	Married	51~100	Grade III	Positive	Unknown	T4	No	No/Unknown	No/Unknown
＞3	≥40	Male	Others	Married	51~100	Unknown	Positive	Unknown	T3	No	Yes	No/Unknown
＞3	≥40	Male	Black	Unmarried	51~100	Grade III	Positive	Unknown	T4	No	No/Unknown	Yes
＞3	≥40	Female	White	Unmarried	21~50	Unknown	Positive	Unknown	T1	No	No/Unknown	Yes
≤3	≥40	Male	White	Unmarried	51~100	Unknown	Positive	Ishak 5-6	T3	No	No/Unknown	No/Unknown
＞3	≥40	Female	White	Married	21~50	Unknown	Positive	Unknown	T2	No	No/Unknown	Yes
≤3	≥40	Male	White	Unmarried	＞100	Grade III	Positive	Unknown	T3	No	No/Unknown	No/Unknown
＞3	≥40	Male	Others	Married	≤20	Unknown	Positive	Unknown	T3	No	No/Unknown	Yes
＞3	＜40	Female	White	Unmarried	＞100	Grade II	Negative	Unknown	T3	Lobectomy	No/Unknown	No/Unknown
≤3	≥40	Male	White	Unmarried	＞100	Unknown	Positive	Ishak 0-4	T3	No	No/Unknown	No/Unknown
＞3	≥40	Male	White	Widowed	21~50	Unknown	Positive	Ishak 5-6	T2	No	No/Unknown	Yes
＞3	＜40	Male	White	Unmarried	＞100	Grade II	Negative	Unknown	T1	Wedge resection	No/Unknown	Yes
＞3	≥40	Male	Others	Married	51~100	Unknown	Positive	Ishak 5-6	T3	No	No/Unknown	Yes
≤3	≥40	Male	Others	Married	Unknown	Unknown	Negative	Unknown	T3	No	No/Unknown	Yes
≤3	≥40	Male	White	Widowed	＞100	Unknown	Positive	Unknown	T3	No	No/Unknown	No/Unknown
＞3	≥40	Male	White	Unmarried	≤20	Unknown	Unknown	Unknown	T2	Local tumor destruction	No/Unknown	No/Unknown
≤3	≥40	Male	White	Married	Unknown	Unknown	Negative	Ishak 5-6	TX	No	No/Unknown	No/Unknown
≤3	≥40	Male	White	Separated	＞100	Unknown	Positive	Unknown	T3	Local tumor destruction	No/Unknown	Yes
＞3	≥40	Male	White	Unmarried	21~50	Grade II	Positive	Ishak 0-4	T3	No	No/Unknown	Yes
≤3	≥40	Male	Others	Married	51~100	Unknown	Positive	Unknown	T3	No	No/Unknown	No/Unknown
＞3	≥40	Male	Black	Unmarried	21~50	Unknown	Unknown	Unknown	T1	No	No/Unknown	No/Unknown
≤3	≥40	Male	White	Married	＞100	Unknown	Positive	Unknown	T3	No	No/Unknown	No/Unknown
＞3	≥40	Female	Black	Widowed	51~100	Grade I	Positive	Unknown	T4	No	No/Unknown	No/Unknown
≤3	≥40	Male	Black	Separated	51~100	Grade II	Unknown	Unknown	T3	No	No/Unknown	Yes
＞3	≥40	Male	White	Married	＞100	Unknown	Positive	Unknown	T1	No	Yes	Yes
≤3	≥40	Male	White	Unmarried	＞100	Grade IV	Negative	Unknown	T3	No	No/Unknown	No/Unknown
＞3	≥40	Male	White	Unknown	21~50	Grade III	Negative	Ishak 5-6	T1	No	Yes	Yes
＞3	≥40	Male	White	Widowed	Unknown	Grade I	Positive	Unknown	T3	No	No/Unknown	Yes
＞3	≥40	Male	White	Married	51~100	Grade III	Unknown	Unknown	T3	No	No/Unknown	Yes
≤3	≥40	Female	Others	Widowed	＞100	Grade III	Unknown	Unknown	TX	No	No/Unknown	No/Unknown
≤3	≥40	Male	White	Married	51~100	Unknown	Unknown	Unknown	T3	No	No/Unknown	No/Unknown
＞3	≥40	Female	White	Married	21~50	Grade I	Positive	Unknown	T2	No	No/Unknown	No/Unknown
＞3	≥40	Male	White	Married	51~100	Grade I	Negative	Unknown	TX	No	No/Unknown	No/Unknown
≤3	≥40	Male	Others	Unmarried	51~100	Grade III	Positive	Unknown	T4	No	No/Unknown	No/Unknown
≤3	≥40	Male	White	Married	51~100	Unknown	Positive	Unknown	T3	No	No/Unknown	No/Unknown
≤3	≥40	Male	White	Married	Unknown	Grade II	Negative	Unknown	T1	No	No/Unknown	No/Unknown
＞3	≥40	Male	White	Divorced	51~100	Grade III	Positive	Unknown	T3	No	No/Unknown	Yes
＞3	≥40	Male	White	Widowed	51~100	Grade II	Positive	Unknown	T4	No	No/Unknown	Yes
≤3	≥40	Male	White	Unmarried	21~50	Unknown	Positive	Ishak 5-6	T1	No	No/Unknown	No/Unknown
≤3	≥40	Male	White	Married	＞100	Grade II	Negative	Unknown	T1	No	No/Unknown	No/Unknown
≤3	≥40	Male	Others	Married	Unknown	Unknown	Positive	Unknown	T4	No	No/Unknown	No/Unknown
＞3	＜40	Male	White	Unmarried	＞100	Grade II	Negative	Unknown	T1	Lobectomy	No/Unknown	Yes
＞3	≥40	Male	White	Unmarried	51~100	Unknown	Positive	Ishak 0-4	T1	No	No/Unknown	No/Unknown
＞3	≥40	Male	Others	Married	51~100	Unknown	Positive	Unknown	T1	No	No/Unknown	Yes
≤3	≥40	Male	White	Married	51~100	Unknown	Positive	Unknown	TX	No	No/Unknown	No/Unknown
≤3	≥40	Male	White	Married	Unknown	Unknown	Positive	Ishak 5-6	T3	No	No/Unknown	No/Unknown
≤3	≥40	Female	White	Married	Unknown	Unknown	Positive	Unknown	TX	No	No/Unknown	No/Unknown
＞3	≥40	Male	Others	Married	＞100	Unknown	Positive	Unknown	T4	No	No/Unknown	Yes
≤3	≥40	Male	White	Married	＞100	Grade II	Unknown	Unknown	T1	No	No/Unknown	No/Unknown
＞3	≥40	Male	White	Unmarried	21~50	Grade III	Positive	Ishak 5-6	T1	No	No/Unknown	No/Unknown
≤3	≥40	Male	Black	Unmarried	21~50	Grade III	Positive	Unknown	T2	No	No/Unknown	No/Unknown
≤3	≥40	Male	White	Married	Unknown	Grade II	Positive	Unknown	TX	No	No/Unknown	Yes
≤3	≥40	Female	White	Separated	21~50	Unknown	Positive	Ishak 5-6	T2	No	No/Unknown	No/Unknown
＞3	≥40	Male	White	Unmarried	51~100	Unknown	Unknown	Ishak 5-6	T3	No	No/Unknown	Yes
＞3	≥40	Male	Others	Unmarried	51~100	Unknown	Positive	Ishak 5-6	T4	No	No/Unknown	No/Unknown
＞3	≥40	Male	White	Unmarried	51~100	Grade IV	Negative	Ishak 5-6	T1	No	No/Unknown	Yes
＞3	≥40	Male	White	Married	21~50	Grade I	Positive	Ishak 5-6	T2	Lobectomy	No/Unknown	Yes
≤3	≥40	Male	White	Unmarried	51~100	Unknown	Positive	Unknown	T3	No	No/Unknown	No/Unknown
≤3	≥40	Male	White	Separated	Unknown	Unknown	Positive	Unknown	T3	No	No/Unknown	No/Unknown
≤3	≥40	Male	White	Married	＞100	Unknown	Positive	Unknown	T3	No	No/Unknown	No/Unknown
＞3	≥40	Male	White	Married	＞100	Grade IV	Positive	Unknown	T3	No	No/Unknown	Yes
≤3	≥40	Male	White	Widowed	51~100	Grade I	Unknown	Unknown	T3	No	No/Unknown	No/Unknown
＞3	≥40	Male	White	Separated	Unknown	Unknown	Unknown	Unknown	TX	No	No/Unknown	No/Unknown
≤3	≥40	Male	White	Divorced	21~50	Unknown	Positive	Ishak 5-6	T3	No	No/Unknown	No/Unknown
＞3	≥40	Female	Black	Unmarried	51~100	Unknown	Positive	Unknown	T3	No	No/Unknown	Yes
＞3	≥40	Male	White	Unmarried	≤20	Unknown	Positive	Unknown	T2	No	No/Unknown	Yes
＞3	≥40	Female	White	Married	＞100	Unknown	Positive	Unknown	T1	No	No/Unknown	Yes
＞3	≥40	Male	White	Married	51~100	Unknown	Positive	Unknown	T3	No	No/Unknown	Yes
＞3	≥40	Male	White	Widowed	21~50	Grade II	Positive	Unknown	T1	No	No/Unknown	No/Unknown
＞3	≥40	Male	Others	Married	＞100	Unknown	Negative	Unknown	T3	No	No/Unknown	Yes
＞3	≥40	Male	Black	Married	21~50	Grade II	Positive	Unknown	T1	No	No/Unknown	Yes
＞3	≥40	Male	White	Unmarried	21~50	Grade II	Unknown	Unknown	T1	No	No/Unknown	Yes
＞3	≥40	Male	Others	Married	51~100	Grade I	Positive	Ishak 5-6	T3	No	No/Unknown	Yes
＞3	≥40	Male	White	Widowed	≤20	Unknown	Positive	Unknown	T2	No	No/Unknown	No/Unknown
≤3	≥40	Female	Black	Unknown	Unknown	Unknown	Positive	Unknown	TX	No	No/Unknown	Yes
＞3	≥40	Female	Others	Married	21~50	Unknown	Positive	Unknown	T1	No	No/Unknown	Yes
＞3	≥40	Male	White	Divorced	51~100	Grade I	Positive	Ishak 5-6	T4	No	No/Unknown	No/Unknown
＞3	≥40	Male	White	Married	Unknown	Unknown	Positive	Unknown	T1	Wedge resection	No/Unknown	No/Unknown
＞3	≥40	Female	White	Unmarried	51~100	Unknown	Unknown	Unknown	T3	No	Yes	No/Unknown
＞3	≥40	Male	White	Divorced	21~50	Unknown	Positive	Ishak 5-6	T3	No	No/Unknown	Yes
＞3	≥40	Male	White	Married	21~50	Grade I	Positive	Unknown	T2	No	No/Unknown	No/Unknown
≤3	≥40	Female	Others	Married	51~100	Unknown	Positive	Ishak 0-4	T3	No	No/Unknown	Yes
＞3	≥40	Male	White	Unmarried	＞100	Unknown	Positive	Unknown	T3	No	No/Unknown	Yes
＞3	≥40	Male	Others	Married	21~50	Grade II	Positive	Unknown	T1	No	No/Unknown	Yes
＞3	≥40	Male	Others	Married	Unknown	Grade II	Positive	Ishak 5-6	T1	Wedge resection	No/Unknown	No/Unknown
＞3	≥40	Male	White	Married	Unknown	Unknown	Negative	Unknown	TX	No	No/Unknown	No/Unknown
≤3	≥40	Male	Others	Divorced	51~100	Unknown	Negative	Unknown	T3	No	No/Unknown	No/Unknown
≤3	≥40	Male	Black	Unmarried	＞100	Grade II	Negative	Unknown	T3	No	No/Unknown	No/Unknown
＞3	≥40	Male	White	Married	＞100	Grade II	Positive	Unknown	T3	No	No/Unknown	Yes
≤3	≥40	Male	White	Unmarried	51~100	Unknown	Unknown	Unknown	T3	No	No/Unknown	No/Unknown
≤3	≥40	Female	Others	Married	21~50	Unknown	Positive	Ishak 5-6	T3	No	No/Unknown	No/Unknown
≤3	≥40	Male	White	Unmarried	51~100	Grade II	Positive	Unknown	T1	No	No/Unknown	No/Unknown
＞3	≥40	Male	White	Married	≤20	Unknown	Positive	Ishak 5-6	T1	No	No/Unknown	No/Unknown
≤3	≥40	Male	White	Unmarried	51~100	Unknown	Unknown	Unknown	T3	No	No/Unknown	No/Unknown
＞3	≥40	Male	Others	Married	51~100	Unknown	Positive	Unknown	T3	No	Yes	Yes
≤3	≥40	Male	White	Married	Unknown	Grade IV	Positive	Unknown	T1	No	No/Unknown	Yes
≤3	≥40	Male	Others	Married	＞100	Grade I	Negative	Unknown	T3	No	No/Unknown	Yes
＞3	≥40	Male	White	Widowed	51~100	Unknown	Positive	Unknown	T3	No	No/Unknown	No/Unknown
＞3	≥40	Male	White	Unknown	21~50	Grade I	Negative	Ishak 0-4	T1	No	Yes	Yes
＞3	≥40	Female	White	Married	21~50	Unknown	Positive	Ishak 5-6	T1	Local tumor destruction	No/Unknown	No/Unknown
＞3	≥40	Male	Black	Married	21~50	Unknown	Positive	Unknown	T1	Local tumor destruction	No/Unknown	No/Unknown
＞3	≥40	Male	White	Unmarried	21~50	Unknown	Positive	Unknown	T1	No	No/Unknown	No/Unknown
＞3	≥40	Male	White	Married	51~100	Grade III	Positive	Unknown	T3	No	No/Unknown	Yes
＞3	≥40	Male	White	Divorced	51~100	Unknown	Negative	Ishak 5-6	T2	No	No/Unknown	Yes
＞3	≥40	Male	White	Unmarried	51~100	Unknown	Unknown	Unknown	T1	No	No/Unknown	No/Unknown
＞3	≥40	Female	White	Married	51~100	Unknown	Positive	Unknown	T3	No	No/Unknown	No/Unknown
＞3	≥40	Male	White	Separated	51~100	Grade I	Positive	Unknown	T3	No	No/Unknown	No/Unknown
≤3	≥40	Female	Others	Widowed	51~100	Grade III	Positive	Unknown	T3	No	No/Unknown	Yes
＞3	≥40	Male	White	Married	Unknown	Unknown	Positive	Unknown	T4	No	No/Unknown	Yes
＞3	≥40	Male	White	Divorced	51~100	Unknown	Positive	Ishak 5-6	T1	No	No/Unknown	Yes
＞3	≥40	Female	White	Married	＞100	Unknown	Unknown	Unknown	T3	No	No/Unknown	No/Unknown
＞3	≥40	Male	White	Widowed	51~100	Unknown	Negative	Unknown	T3	No	No/Unknown	No/Unknown
＞3	≥40	Male	Black	Married	＞100	Grade II	Unknown	Unknown	TX	No	No/Unknown	Yes
≤3	≥40	Male	Others	Married	Unknown	Unknown	Positive	Unknown	T3	No	No/Unknown	Yes
＞3	≥40	Male	White	Unmarried	51~100	Grade I	Negative	Unknown	T1	No	No/Unknown	Yes
≤3	≥40	Male	White	Divorced	＞100	Grade I	Unknown	Ishak 5-6	T1	No	No/Unknown	Yes
≤3	≥40	Female	White	Married	Unknown	Unknown	Unknown	Unknown	T1	No	No/Unknown	No/Unknown
＞3	≥40	Male	White	Unmarried	21~50	Unknown	Positive	Ishak 5-6	T2	Local tumor destruction	No/Unknown	No/Unknown
＞3	≥40	Male	White	Married	21~50	Unknown	Positive	Unknown	T1	No	No/Unknown	Yes
≤3	≥40	Male	White	Married	21~50	Unknown	Positive	Unknown	TX	No	No/Unknown	No/Unknown
≤3	≥40	Male	Black	Married	＞100	Unknown	Positive	Unknown	T3	No	No/Unknown	No/Unknown
≤3	≥40	Male	White	Unmarried	＞100	Unknown	Positive	Unknown	T3	No	No/Unknown	No/Unknown
＞3	≥40	Male	White	Divorced	＞100	Unknown	Negative	Ishak 5-6	T3	No	No/Unknown	Yes
≤3	≥40	Male	White	Divorced	＞100	Unknown	Positive	Unknown	T4	No	No/Unknown	No/Unknown
≤3	≥40	Male	White	Married	21~50	Grade II	Unknown	Unknown	T1	No	No/Unknown	No/Unknown
＞3	≥40	Male	White	Married	51~100	Unknown	Positive	Unknown	T4	No	No/Unknown	Yes
＞3	≥40	Male	White	Unmarried	21~50	Unknown	Unknown	Unknown	T2	No	No/Unknown	No/Unknown
＞3	≥40	Male	White	Separated	Unknown	Unknown	Positive	Unknown	T3	No	No/Unknown	No/Unknown
＞3	＜40	Female	Others	Unmarried	51~100	Unknown	Positive	Unknown	T3	No	No/Unknown	Yes
＞3	≥40	Male	White	Married	21~50	Grade I	Negative	Unknown	T4	No	Yes	No/Unknown
＞3	≥40	Male	Black	Married	≤20	Unknown	Positive	Ishak 5-6	T2	No	No/Unknown	No/Unknown
≤3	≥40	Male	White	Separated	51~100	Unknown	Positive	Unknown	T3	No	No/Unknown	No/Unknown
＞3	≥40	Male	White	Unmarried	21~50	Grade II	Positive	Ishak 5-6	T1	No	No/Unknown	No/Unknown
＞3	≥40	Male	White	Divorced	21~50	Unknown	Positive	Unknown	T2	No	Yes	No/Unknown
≤3	≥40	Male	White	Divorced	＞100	Grade I	Positive	Unknown	T3	No	No/Unknown	Yes
≤3	≥40	Male	White	Divorced	51~100	Grade III	Positive	Ishak 5-6	T3	No	No/Unknown	No/Unknown
＞3	≥40	Male	White	Unmarried	＞100	Unknown	Positive	Unknown	T3	No	No/Unknown	No/Unknown
＞3	＜40	Male	White	Unmarried	＞100	Grade II	Negative	Ishak 0-4	T3	Lobectomy	No/Unknown	Yes
＞3	≥40	Female	White	Married	51~100	Unknown	Positive	Unknown	T1	No	No/Unknown	Yes
＞3	≥40	Male	Others	Unmarried	51~100	Unknown	Positive	Ishak 0-4	T3	No	No/Unknown	Yes
＞3	≥40	Male	White	Unmarried	51~100	Unknown	Positive	Unknown	T3	No	No/Unknown	Yes
＞3	＜40	Male	White	Unmarried	＞100	Grade I	Negative	Unknown	T3	No	No/Unknown	Yes
≤3	≥40	Male	White	Married	＞100	Grade II	Positive	Unknown	T3	No	No/Unknown	No/Unknown
＞3	＜40	Female	Others	Unmarried	＞100	Unknown	Positive	Unknown	T3	No	No/Unknown	Yes
≤3	≥40	Male	Others	Widowed	Unknown	Unknown	Positive	Unknown	T3	No	No/Unknown	No/Unknown
≤3	≥40	Male	White	Divorced	Unknown	Grade I	Unknown	Ishak 5-6	TX	No	No/Unknown	No/Unknown
≤3	≥40	Male	White	Married	＞100	Unknown	Positive	Unknown	T3	No	No/Unknown	No/Unknown
＞3	≥40	Male	Black	Married	51~100	Unknown	Positive	Unknown	T3	No	No/Unknown	Yes
≤3	≥40	Female	White	Divorced	51~100	Unknown	Unknown	Ishak 5-6	T3	No	No/Unknown	No/Unknown
＞3	≥40	Female	White	Married	Unknown	Unknown	Positive	Unknown	T1	No	No/Unknown	No/Unknown
≤3	≥40	Male	White	Married	Unknown	Unknown	Positive	Unknown	T3	No	No/Unknown	No/Unknown
≤3	≥40	Male	White	Married	21~50	Unknown	Negative	Unknown	T4	No	No/Unknown	No/Unknown
＞3	≥40	Male	White	Married	＞100	Unknown	Positive	Unknown	T3	No	No/Unknown	Yes
＞3	≥40	Male	White	Unmarried	Unknown	Unknown	Positive	Unknown	TX	No	No/Unknown	Yes
≤3	≥40	Male	White	Married	＞100	Unknown	Positive	Unknown	T3	No	No/Unknown	Yes
＞3	≥40	Male	Others	Married	51~100	Unknown	Positive	Unknown	T3	No	No/Unknown	Yes
≤3	≥40	Male	White	Divorced	51~100	Grade III	Positive	Unknown	T4	No	No/Unknown	No/Unknown
≤3	≥40	Male	Black	Unmarried	Unknown	Unknown	Positive	Unknown	TX	No	No/Unknown	No/Unknown
＞3	≥40	Male	Others	Married	51~100	Unknown	Negative	Unknown	T3	No	No/Unknown	No/Unknown
＞3	≥40	Male	Black	Unknown	21~50	Grade II	Unknown	Unknown	T1	No	No/Unknown	No/Unknown
≤3	≥40	Male	White	Married	Unknown	Unknown	Positive	Ishak 5-6	T3	No	No/Unknown	No/Unknown
＞3	≥40	Male	White	Married	21~50	Grade III	Unknown	Unknown	T1	No	No/Unknown	No/Unknown
＞3	≥40	Male	White	Married	51~100	Unknown	Positive	Ishak 5-6	T4	No	Yes	Yes
≤3	≥40	Male	White	Married	＞100	Unknown	Positive	Unknown	T3	No	No/Unknown	No/Unknown
≤3	≥40	Male	White	Married	51~100	Grade I	Positive	Unknown	T3	No	No/Unknown	No/Unknown
＞3	≥40	Female	White	Married	21~50	Unknown	Positive	Unknown	T1	No	No/Unknown	No/Unknown
＞3	≥40	Male	White	Married	＞100	Unknown	Positive	Unknown	T1	No	No/Unknown	Yes
≤3	≥40	Male	White	Widowed	Unknown	Unknown	Positive	Unknown	TX	No	No/Unknown	No/Unknown
≤3	≥40	Male	White	Married	51~100	Unknown	Positive	Unknown	T3	No	No/Unknown	No/Unknown
＞3	≥40	Male	White	Divorced	21~50	Unknown	Positive	Ishak 5-6	T2	No	No/Unknown	Yes
≤3	≥40	Male	White	Married	51~100	Unknown	Positive	Unknown	T4	No	No/Unknown	Yes
＞3	≥40	Male	White	Married	＞100	Unknown	Positive	Unknown	T4	No	Yes	No/Unknown
＞3	≥40	Male	White	Married	21~50	Unknown	Negative	Unknown	T2	No	No/Unknown	Yes
≤3	≥40	Male	White	Married	21~50	Unknown	Positive	Unknown	T2	No	No/Unknown	No/Unknown
≤3	≥40	Male	Others	Married	51~100	Unknown	Positive	Unknown	T3	No	No/Unknown	No/Unknown
≤3	≥40	Female	White	Married	Unknown	Unknown	Positive	Unknown	T3	No	No/Unknown	No/Unknown
≤3	≥40	Female	White	Divorced	＞100	Grade II	Positive	Unknown	T1	No	No/Unknown	No/Unknown
≤3	≥40	Male	White	Divorced	21~50	Unknown	Positive	Ishak 5-6	T4	No	No/Unknown	Yes
＞3	≥40	Male	White	Married	51~100	Unknown	Positive	Ishak 5-6	T3	Local tumor destruction	No/Unknown	Yes
＞3	≥40	Female	Others	Unknown	21~50	Unknown	Positive	Unknown	T2	No	No/Unknown	No/Unknown
≤3	≥40	Female	Black	Married	21~50	Unknown	Positive	Unknown	T2	No	No/Unknown	No/Unknown
＞3	≥40	Male	White	Unmarried	＞100	Unknown	Positive	Ishak 5-6	T1	No	No/Unknown	Yes
≤3	≥40	Male	White	Married	＞100	Unknown	Unknown	Unknown	T4	No	No/Unknown	No/Unknown
≤3	≥40	Female	White	Married	21~50	Unknown	Positive	Ishak 5-6	T2	No	No/Unknown	Yes
≤3	≥40	Male	Black	Unmarried	＞100	Grade II	Positive	Unknown	T4	No	No/Unknown	No/Unknown
＞3	≥40	Male	White	Married	21~50	Unknown	Positive	Ishak 5-6	T2	Local tumor destruction	No/Unknown	Yes
≤3	≥40	Male	White	Unmarried	Unknown	Unknown	Unknown	Unknown	TX	No	No/Unknown	No/Unknown
＞3	≥40	Male	White	Married	21~50	Unknown	Positive	Ishak 5-6	T3	No	Yes	No/Unknown
≤3	≥40	Male	White	Married	51~100	Grade II	Unknown	Unknown	T1	No	No/Unknown	No/Unknown
≤3	≥40	Male	White	Married	51~100	Grade II	Positive	Unknown	T4	No	No/Unknown	No/Unknown
≤3	≥40	Male	White	Married	51~100	Grade III	Positive	Unknown	T1	No	No/Unknown	No/Unknown
＞3	≥40	Male	White	Unmarried	Unknown	Unknown	Positive	Unknown	TX	No	No/Unknown	No/Unknown
≤3	≥40	Male	Black	Unmarried	51~100	Unknown	Positive	Unknown	T3	No	No/Unknown	No/Unknown
＞3	≥40	Male	Black	Separated	21~50	Unknown	Negative	Ishak 0-4	T2	No	No/Unknown	Yes
＞3	≥40	Male	White	Divorced	51~100	Unknown	Unknown	Unknown	T1	No	No/Unknown	Yes
≤3	≥40	Male	White	Divorced	21~50	Unknown	Positive	Unknown	T3	No	No/Unknown	No/Unknown
＞3	≥40	Male	White	Divorced	21~50	Unknown	Positive	Ishak 5-6	T2	No	No/Unknown	No/Unknown
＞3	≥40	Male	White	Married	Unknown	Unknown	Positive	Unknown	TX	No	No/Unknown	Yes
＞3	≥40	Male	White	Widowed	51~100	Unknown	Unknown	Ishak 5-6	T3	No	No/Unknown	Yes
＞3	＜40	Male	White	Unmarried	51~100	Grade II	Negative	Unknown	T3	Wedge resection	No/Unknown	No/Unknown
＞3	≥40	Male	White	Married	51~100	Unknown	Unknown	Unknown	T3	No	No/Unknown	Yes
＞3	≥40	Male	Others	Married	21~50	Unknown	Unknown	Unknown	T2	No	No/Unknown	Yes
＞3	≥40	Male	White	Married	51~100	Unknown	Negative	Unknown	T3	No	No/Unknown	Yes
＞3	≥40	Male	White	Unmarried	51~100	Grade II	Positive	Unknown	T3	No	No/Unknown	No/Unknown
≤3	≥40	Male	White	Unmarried	＞100	Unknown	Negative	Unknown	T3	No	No/Unknown	No/Unknown
＞3	≥40	Male	White	Unmarried	21~50	Grade I	Negative	Unknown	T2	No	No/Unknown	Yes
≤3	≥40	Male	Black	Married	Unknown	Unknown	Positive	Unknown	T3	No	No/Unknown	No/Unknown
＞3	≥40	Male	White	Unknown	51~100	Unknown	Negative	Ishak 5-6	T2	No	No/Unknown	Yes
≤3	≥40	Male	White	Married	＞100	Unknown	Positive	Unknown	T3	No	No/Unknown	Yes
≤3	≥40	Male	White	Married	51~100	Unknown	Negative	Unknown	T3	No	No/Unknown	No/Unknown
＞3	≥40	Male	White	Divorced	21~50	Unknown	Positive	Unknown	T1	No	No/Unknown	Yes
≤3	≥40	Male	White	Unmarried	21~50	Unknown	Unknown	Unknown	T1	No	No/Unknown	No/Unknown
＞3	≥40	Female	Others	Divorced	＞100	Grade II	Positive	Unknown	T3	No	Yes	Yes
＞3	≥40	Male	White	Married	＞100	Grade II	Positive	Ishak 5-6	T3	No	No/Unknown	Yes
≤3	≥40	Male	White	Married	21~50	Grade II	Negative	Ishak 5-6	T2	No	No/Unknown	Yes
≤3	≥40	Female	White	Unknown	51~100	Unknown	Positive	Ishak 5-6	T3	No	No/Unknown	No/Unknown
＞3	≥40	Male	Others	Unmarried	＞100	Unknown	Positive	Ishak 5-6	T3	No	No/Unknown	Yes
≤3	≥40	Male	White	Married	51~100	Grade III	Unknown	Unknown	T3	No	No/Unknown	No/Unknown
＞3	≥40	Female	White	Married	21~50	Grade II	Positive	Unknown	T3	No	Yes	Yes
≤3	≥40	Male	White	Married	Unknown	Unknown	Positive	Unknown	T3	No	No/Unknown	No/Unknown
＞3	≥40	Male	White	Married	21~50	Unknown	Positive	Unknown	T2	Local tumor destruction	No/Unknown	Yes
＞3	≥40	Male	White	Married	≤20	Unknown	Unknown	Unknown	T2	No	No/Unknown	Yes
≤3	≥40	Male	White	Married	51~100	Unknown	Positive	Ishak 5-6	T3	No	No/Unknown	No/Unknown
＞3	≥40	Male	White	Divorced	21~50	Unknown	Negative	Unknown	T1	No	No/Unknown	Yes
＞3	≥40	Male	White	Married	＞100	Unknown	Positive	Ishak 5-6	T3	No	Yes	Yes
≤3	≥40	Male	White	Unmarried	21~50	Unknown	Positive	Unknown	TX	No	No/Unknown	Yes
≤3	≥40	Male	White	Divorced	＞100	Unknown	Positive	Unknown	T3	No	No/Unknown	No/Unknown
≤3	≥40	Male	White	Married	Unknown	Grade II	Positive	Unknown	TX	No	No/Unknown	Yes
＞3	＜40	Male	White	Unmarried	21~50	Unknown	Negative	Unknown	T2	No	No/Unknown	Yes
≤3	≥40	Female	White	Married	＞100	Grade II	Positive	Unknown	T4	No	No/Unknown	No/Unknown
≤3	≥40	Male	White	Divorced	51~100	Grade II	Negative	Ishak 0-4	T3	No	No/Unknown	No/Unknown
≤3	≥40	Male	White	Unmarried	Unknown	Unknown	Positive	Unknown	T3	No	No/Unknown	No/Unknown
≤3	≥40	Male	Others	Unmarried	51~100	Unknown	Positive	Unknown	T4	No	No/Unknown	No/Unknown
＞3	≥40	Male	Black	Widowed	21~50	Unknown	Positive	Unknown	T1	No	No/Unknown	No/Unknown
＞3	≥40	Male	White	Married	21~50	Grade II	Positive	Unknown	T2	No	No/Unknown	Yes
＞3	≥40	Male	White	Married	Unknown	Grade I	Unknown	Unknown	TX	Local tumor destruction	No/Unknown	Yes
＞3	≥40	Female	White	Married	21~50	Unknown	Positive	Unknown	T1	Lobectomy	No/Unknown	Yes
＞3	≥40	Male	Others	Unmarried	51~100	Grade II	Negative	Ishak 5-6	T1	Wedge resection	Yes	Yes
≤3	≥40	Male	White	Unmarried	Unknown	Unknown	Positive	Ishak 5-6	T3	No	No/Unknown	Yes
＞3	≥40	Male	Others	Unmarried	51~100	Unknown	Positive	Unknown	T3	No	No/Unknown	Yes
≤3	≥40	Female	White	Married	51~100	Unknown	Positive	Unknown	T3	No	Yes	No/Unknown
＞3	≥40	Female	White	Unknown	21~50	Unknown	Negative	Unknown	T2	No	No/Unknown	Yes
＞3	≥40	Male	White	Married	51~100	Unknown	Unknown	Ishak 5-6	T1	No	No/Unknown	No/Unknown
≤3	≥40	Male	Black	Divorced	51~100	Grade III	Positive	Unknown	T1	No	No/Unknown	No/Unknown
≤3	≥40	Male	White	Unmarried	＞100	Unknown	Negative	Unknown	T4	No	No/Unknown	No/Unknown
＞3	≥40	Male	White	Married	51~100	Unknown	Positive	Ishak 5-6	T1	No	No/Unknown	No/Unknown
≤3	≥40	Male	Others	Widowed	＞100	Grade III	Positive	Ishak 5-6	T3	No	No/Unknown	Yes
＞3	≥40	Male	Others	Married	21~50	Grade II	Positive	Ishak 5-6	T2	No	No/Unknown	Yes
≤3	≥40	Male	Others	Married	51~100	Grade I	Positive	Ishak 0-4	T3	No	No/Unknown	No/Unknown
＞3	≥40	Male	White	Married	＞100	Unknown	Positive	Unknown	T3	No	No/Unknown	Yes
＞3	≥40	Male	Others	Married	21~50	Grade III	Positive	Ishak 5-6	T1	Local tumor destruction	No/Unknown	Yes
＞3	≥40	Male	White	Unmarried	51~100	Unknown	Positive	Unknown	T3	No	Yes	No/Unknown
＞3	≥40	Female	White	Married	21~50	Unknown	Positive	Ishak 5-6	T2	No	No/Unknown	Yes
≤3	≥40	Male	White	Unmarried	21~50	Unknown	Negative	Unknown	T1	No	No/Unknown	No/Unknown
＞3	≥40	Male	White	Unmarried	51~100	Unknown	Positive	Ishak 5-6	T1	No	No/Unknown	Yes
＞3	≥40	Male	Black	Married	51~100	Unknown	Positive	Unknown	T3	No	No/Unknown	No/Unknown
＞3	≥40	Male	White	Married	21~50	Grade I	Positive	Unknown	T1	No	No/Unknown	Yes
＞3	≥40	Male	White	Married	51~100	Unknown	Positive	Unknown	T3	No	No/Unknown	Yes
≤3	≥40	Male	White	Married	51~100	Grade III	Positive	Ishak 5-6	T2	No	No/Unknown	No/Unknown
＞3	≥40	Male	White	Married	21~50	Unknown	Negative	Ishak 5-6	T2	No	No/Unknown	Yes
≤3	≥40	Male	White	Divorced	＞100	Grade III	Positive	Unknown	T3	No	No/Unknown	No/Unknown
≤3	≥40	Female	White	Unmarried	Unknown	Unknown	Positive	Ishak 5-6	TX	No	No/Unknown	No/Unknown
＞3	≥40	Male	White	Married	Unknown	Unknown	Positive	Unknown	T3	No	No/Unknown	Yes
＞3	≥40	Male	White	Separated	21~50	Unknown	Positive	Ishak 5-6	T2	No	No/Unknown	No/Unknown
≤3	≥40	Female	White	Married	＞100	Grade II	Negative	Unknown	T3	No	No/Unknown	No/Unknown
≤3	≥40	Male	White	Divorced	Unknown	Grade II	Unknown	Unknown	TX	No	Yes	No/Unknown
≤3	≥40	Male	White	Unknown	＞100	Unknown	Positive	Unknown	T3	No	No/Unknown	No/Unknown
＞3	≥40	Female	White	Married	51~100	Unknown	Positive	Unknown	T1	No	No/Unknown	No/Unknown
＞3	≥40	Female	White	Unmarried	＞100	Unknown	Positive	Unknown	T3	Local tumor destruction	Yes	No/Unknown
≤3	≥40	Female	White	Unmarried	Unknown	Unknown	Positive	Unknown	TX	No	No/Unknown	No/Unknown
≤3	≥40	Male	White	Married	21~50	Unknown	Negative	Unknown	T2	No	No/Unknown	No/Unknown
＞3	≥40	Female	White	Unmarried	51~100	Unknown	Positive	Unknown	T3	No	Yes	No/Unknown
＞3	≥40	Male	White	Divorced	21~50	Unknown	Positive	Ishak 5-6	T2	No	No/Unknown	Yes
＞3	≥40	Male	White	Widowed	≤20	Unknown	Negative	Unknown	T2	No	No/Unknown	Yes
≤3	≥40	Female	White	Unmarried	21~50	Unknown	Negative	Unknown	T1	No	No/Unknown	No/Unknown
＞3	≥40	Male	White	Married	Unknown	Unknown	Positive	Unknown	T3	No	No/Unknown	No/Unknown
＞3	≥40	Female	White	Widowed	≤20	Grade III	Positive	Unknown	T2	No	No/Unknown	Yes
＞3	≥40	Male	White	Married	Unknown	Unknown	Unknown	Unknown	TX	No	No/Unknown	No/Unknown
＞3	≥40	Male	White	Married	51~100	Unknown	Unknown	Unknown	T2	No	No/Unknown	No/Unknown
≤3	≥40	Male	White	Unmarried	Unknown	Grade III	Positive	Unknown	T3	No	No/Unknown	No/Unknown
≤3	≥40	Male	White	Married	Unknown	Unknown	Positive	Unknown	T3	No	No/Unknown	No/Unknown
≤3	≥40	Male	White	Married	Unknown	Unknown	Positive	Unknown	TX	No	No/Unknown	No/Unknown
＞3	≥40	Male	White	Married	21~50	Grade II	Positive	Unknown	T1	Lobectomy	No/Unknown	Yes
＞3	≥40	Male	White	Married	21~50	Unknown	Positive	Ishak 5-6	T2	No	No/Unknown	Yes
＞3	≥40	Male	White	Married	51~100	Unknown	Positive	Ishak 0-4	T3	No	Yes	Yes
＞3	≥40	Male	White	Married	51~100	Unknown	Negative	Unknown	T1	No	No/Unknown	No/Unknown
＞3	≥40	Male	White	Married	21~50	Grade II	Positive	Unknown	T1	No	No/Unknown	Yes
＞3	≥40	Male	White	Unknown	51~100	Unknown	Unknown	Ishak 5-6	T3	No	No/Unknown	Yes
＞3	≥40	Male	Others	Married	21~50	Grade I	Negative	Ishak 5-6	T2	No	No/Unknown	No/Unknown
＞3	≥40	Male	White	Married	51~100	Grade II	Positive	Unknown	T1	No	Yes	Yes
＞3	≥40	Male	Others	Married	51~100	Grade III	Unknown	Unknown	T3	No	Yes	Yes
＞3	≥40	Male	White	Married	51~100	Grade III	Positive	Ishak 5-6	T3	No	No/Unknown	Yes
＞3	≥40	Male	White	Unmarried	21~50	Unknown	Positive	Unknown	T2	No	No/Unknown	No/Unknown
≤3	≥40	Male	Others	Unmarried	＞100	Unknown	Positive	Unknown	T1	No	No/Unknown	Yes
＞3	≥40	Male	White	Married	51~100	Unknown	Negative	Ishak 5-6	T3	No	No/Unknown	Yes
≤3	≥40	Male	Black	Unmarried	＞100	Unknown	Negative	Ishak 5-6	T3	No	No/Unknown	No/Unknown
≤3	≥40	Male	White	Married	＞100	Unknown	Positive	Unknown	T3	No	No/Unknown	Yes
＞3	≥40	Male	White	Married	51~100	Unknown	Positive	Ishak 5-6	T4	No	Yes	No/Unknown
＞3	≥40	Female	White	Unknown	51~100	Unknown	Positive	Ishak 0-4	T1	No	No/Unknown	Yes
＞3	≥40	Male	White	Unmarried	21~50	Unknown	Positive	Unknown	T2	No	No/Unknown	Yes
＞3	≥40	Male	White	Widowed	51~100	Grade I	Positive	Unknown	T3	No	Yes	Yes
≤3	≥40	Male	White	Married	51~100	Unknown	Positive	Unknown	T3	No	No/Unknown	Yes
≤3	≥40	Male	Others	Married	＞100	Unknown	Unknown	Unknown	T1	No	No/Unknown	No/Unknown
＞3	≥40	Male	White	Unmarried	51~100	Unknown	Negative	Unknown	T3	No	No/Unknown	Yes
＞3	≥40	Male	White	Married	Unknown	Unknown	Positive	Unknown	T2	No	No/Unknown	No/Unknown
＞3	≥40	Male	White	Separated	Unknown	Unknown	Positive	Unknown	T3	No	Yes	No/Unknown
＞3	≥40	Male	White	Married	Unknown	Unknown	Unknown	Unknown	TX	No	No/Unknown	No/Unknown
≤3	≥40	Male	White	Unknown	Unknown	Grade II	Unknown	Unknown	TX	No	No/Unknown	No/Unknown
＞3	≥40	Male	White	Married	Unknown	Grade I	Positive	Unknown	T3	No	No/Unknown	No/Unknown
≤3	≥40	Male	White	Separated	＞100	Grade II	Positive	Unknown	T3	No	No/Unknown	No/Unknown
＞3	≥40	Male	White	Unmarried	51~100	Unknown	Unknown	Unknown	T3	No	No/Unknown	No/Unknown
＞3	≥40	Male	White	Married	＞100	Unknown	Positive	Ishak 5-6	T3	Local tumor destruction	No/Unknown	Yes
＞3	≥40	Male	Black	Divorced	21~50	Grade II	Positive	Unknown	T1	Wedge resection	No/Unknown	No/Unknown
＞3	≥40	Male	White	Widowed	51~100	Unknown	Negative	Unknown	T2	No	No/Unknown	Yes
＞3	≥40	Male	Others	Married	21~50	Grade II	Positive	Unknown	T3	No	No/Unknown	Yes
＞3	≥40	Male	White	Unmarried	51~100	Unknown	Positive	Ishak 5-6	T1	No	No/Unknown	Yes
＞3	≥40	Female	White	Married	≤20	Unknown	Positive	Unknown	T2	No	No/Unknown	Yes
≤3	≥40	Male	Others	Unmarried	21~50	Unknown	Positive	Unknown	T2	No	No/Unknown	No/Unknown
＞3	≥40	Male	Others	Married	≤20	Unknown	Unknown	Ishak 5-6	T1	Local tumor destruction	No/Unknown	Yes
≤3	≥40	Female	White	Divorced	＞100	Unknown	Positive	Ishak 5-6	T3	No	No/Unknown	Yes
≤3	≥40	Male	White	Married	＞100	Unknown	Positive	Unknown	TX	No	No/Unknown	No/Unknown
＞3	≥40	Male	Others	Married	21~50	Unknown	Positive	Unknown	T2	No	No/Unknown	Yes
＞3	≥40	Male	White	Married	51~100	Unknown	Negative	Ishak 0-4	T3	No	Yes	Yes
＞3	≥40	Female	Others	Divorced	21~50	Unknown	Positive	Unknown	T2	No	No/Unknown	No/Unknown
＞3	≥40	Male	White	Married	21~50	Unknown	Negative	Unknown	T2	No	No/Unknown	Yes
＞3	≥40	Male	White	Married	≤20	Unknown	Positive	Ishak 5-6	T1	No	No/Unknown	Yes
＞3	≥40	Male	White	Married	21~50	Grade I	Positive	Unknown	T1	No	No/Unknown	No/Unknown
＞3	≥40	Female	White	Separated	51~100	Unknown	Negative	Ishak 5-6	T3	No	No/Unknown	Yes
＞3	≥40	Male	White	Divorced	51~100	Unknown	Positive	Unknown	T3	No	No/Unknown	Yes
＞3	≥40	Male	Others	Married	21~50	Unknown	Negative	Unknown	T2	No	No/Unknown	Yes
＞3	≥40	Male	White	Unknown	21~50	Unknown	Positive	Ishak 5-6	T1	Local tumor destruction	Yes	Yes
＞3	≥40	Male	Black	Unmarried	21~50	Grade I	Unknown	Unknown	T2	No	Yes	Yes
＞3	≥40	Male	White	Unmarried	≤20	Unknown	Unknown	Ishak 5-6	T1	No	No/Unknown	Yes
≤3	≥40	Male	White	Unmarried	51~100	Unknown	Unknown	Unknown	T3	No	No/Unknown	No/Unknown
＞3	≥40	Female	White	Married	51~100	Unknown	Negative	Unknown	T3	No	No/Unknown	No/Unknown
≤3	≥40	Female	White	Married	51~100	Grade III	Unknown	Unknown	T1	No	No/Unknown	Yes
＞3	≥40	Male	White	Married	21~50	Grade II	Positive	Ishak 5-6	T2	Lobectomy	No/Unknown	Yes
＞3	≥40	Male	White	Married	51~100	Unknown	Unknown	Unknown	T1	No	No/Unknown	Yes
≤3	≥40	Male	White	Married	Unknown	Grade II	Negative	Ishak 5-6	T3	No	No/Unknown	Yes
≤3	≥40	Male	White	Married	51~100	Grade III	Positive	Unknown	T1	No	No/Unknown	No/Unknown
＞3	≥40	Male	White	Married	21~50	Grade II	Positive	Ishak 5-6	T3	No	No/Unknown	No/Unknown
＞3	≥40	Male	White	Unmarried	51~100	Unknown	Positive	Unknown	T3	No	No/Unknown	Yes
≤3	≥40	Male	Black	Unmarried	21~50	Unknown	Positive	Ishak 5-6	T2	No	No/Unknown	No/Unknown
≤3	≥40	Male	Black	Unmarried	21~50	Grade II	Negative	Ishak 5-6	T1	No	No/Unknown	No/Unknown
≤3	≥40	Male	White	Married	＞100	Unknown	Positive	Ishak 5-6	T3	No	No/Unknown	Yes
＞3	≥40	Male	White	Widowed	21~50	Unknown	Positive	Ishak 5-6	T1	No	No/Unknown	Yes
≤3	≥40	Female	White	Unmarried	21~50	Unknown	Positive	Unknown	T4	No	No/Unknown	Yes
＞3	≥40	Male	Black	Unmarried	51~100	Unknown	Positive	Unknown	T4	No	Yes	Yes
≤3	≥40	Male	Black	Married	＞100	Grade III	Positive	Ishak 5-6	T3	No	No/Unknown	Yes
＞3	≥40	Male	White	Married	21~50	Unknown	Negative	Unknown	T1	No	No/Unknown	No/Unknown
＞3	≥40	Male	White	Married	51~100	Unknown	Negative	Unknown	T3	No	No/Unknown	Yes
＞3	≥40	Male	Black	Unmarried	51~100	Grade III	Positive	Unknown	T3	No	Yes	Yes
≤3	≥40	Female	White	Married	Unknown	Unknown	Positive	Ishak 5-6	TX	No	No/Unknown	No/Unknown
＞3	≥40	Male	White	Married	≤20	Grade II	Positive	Unknown	T4	No	Yes	Yes
＞3	≥40	Male	White	Married	51~100	Unknown	Positive	Unknown	T3	No	No/Unknown	Yes
≤3	≥40	Male	White	Married	Unknown	Grade I	Positive	Unknown	T2	No	No/Unknown	No/Unknown
＞3	≥40	Male	White	Married	51~100	Grade III	Positive	Ishak 0-4	T3	No	No/Unknown	Yes
≤3	≥40	Male	White	Unmarried	＞100	Unknown	Positive	Unknown	T3	No	No/Unknown	No/Unknown
≤3	≥40	Female	Black	Widowed	21~50	Grade III	Negative	Unknown	T2	No	No/Unknown	No/Unknown
＞3	≥40	Male	White	Unmarried	Unknown	Unknown	Positive	Unknown	TX	No	No/Unknown	Yes
＞3	≥40	Male	White	Married	51~100	Unknown	Unknown	Unknown	T1	No	No/Unknown	No/Unknown
＞3	≥40	Male	White	Married	≤20	Unknown	Negative	Unknown	T2	No	No/Unknown	No/Unknown
≤3	≥40	Male	White	Married	51~100	Unknown	Positive	Unknown	T3	No	No/Unknown	No/Unknown
≤3	≥40	Male	White	Married	51~100	Unknown	Positive	Unknown	T3	No	No/Unknown	No/Unknown
≤3	≥40	Male	White	Divorced	21~50	Unknown	Positive	Unknown	T1	No	No/Unknown	No/Unknown
≤3	≥40	Male	White	Divorced	＞100	Unknown	Positive	Unknown	T3	No	No/Unknown	No/Unknown
＞3	≥40	Male	White	Married	＞100	Unknown	Positive	Unknown	T3	No	No/Unknown	No/Unknown
≤3	≥40	Male	White	Unmarried	51~100	Unknown	Unknown	Unknown	T3	Local tumor destruction	No/Unknown	Yes
＞3	≥40	Female	Black	Divorced	51~100	Unknown	Positive	Ishak 0-4	T3	No	No/Unknown	Yes
＞3	≥40	Female	White	Widowed	≤20	Unknown	Positive	Unknown	T2	No	No/Unknown	Yes
≤3	≥40	Male	White	Unmarried	Unknown	Unknown	Positive	Unknown	TX	No	No/Unknown	No/Unknown
≤3	≥40	Male	White	Unmarried	Unknown	Unknown	Positive	Unknown	T3	No	No/Unknown	No/Unknown
＞3	≥40	Male	White	Unknown	＞100	Unknown	Negative	Unknown	T1	No	No/Unknown	No/Unknown
≤3	≥40	Female	White	Widowed	＞100	Unknown	Positive	Unknown	T3	No	No/Unknown	No/Unknown
≤3	≥40	Female	White	Widowed	Unknown	Unknown	Unknown	Ishak 5-6	T3	No	No/Unknown	No/Unknown
≤3	≥40	Male	Black	Unmarried	Unknown	Unknown	Unknown	Unknown	T4	No	No/Unknown	No/Unknown
≤3	≥40	Male	White	Married	Unknown	Unknown	Positive	Unknown	TX	No	No/Unknown	Yes
≤3	≥40	Male	White	Divorced	51~100	Unknown	Positive	Unknown	T1	No	No/Unknown	No/Unknown
≤3	≥40	Female	White	Widowed	51~100	Unknown	Unknown	Unknown	T1	No	No/Unknown	No/Unknown
＞3	≥40	Male	White	Married	Unknown	Unknown	Negative	Ishak 5-6	T3	No	No/Unknown	Yes
＞3	≥40	Male	White	Divorced	21~50	Unknown	Positive	Ishak 0-4	T2	Lobectomy	No/Unknown	Yes
＞3	＜40	Male	White	Unmarried	＞100	Grade III	Negative	Unknown	T2	Wedge resection	No/Unknown	Yes
＞3	≥40	Male	White	Married	Unknown	Unknown	Positive	Unknown	T3	No	No/Unknown	No/Unknown
≤3	≥40	Male	White	Widowed	21~50	Unknown	Positive	Unknown	T2	No	No/Unknown	No/Unknown
＞3	≥40	Male	White	Married	51~100	Unknown	Positive	Unknown	T3	No	No/Unknown	No/Unknown
≤3	≥40	Male	White	Married	≤20	Unknown	Positive	Unknown	T3	No	No/Unknown	No/Unknown
＞3	≥40	Male	White	Divorced	Unknown	Grade II	Positive	Unknown	T3	No	No/Unknown	Yes
≤3	≥40	Male	White	Married	21~50	Grade II	Positive	Unknown	T1	Local tumor destruction	No/Unknown	No/Unknown
＞3	≥40	Male	White	Divorced	51~100	Grade I	Positive	Unknown	T1	No	No/Unknown	Yes
＞3	≥40	Male	White	Divorced	51~100	Unknown	Positive	Unknown	T3	No	No/Unknown	Yes
≤3	≥40	Male	White	Unmarried	51~100	Unknown	Negative	Unknown	T3	No	No/Unknown	No/Unknown
≤3	≥40	Female	White	Married	51~100	Unknown	Positive	Ishak 0-4	T1	No	No/Unknown	No/Unknown
≤3	≥40	Male	White	Unmarried	＞100	Unknown	Unknown	Unknown	T1	No	No/Unknown	No/Unknown
≤3	≥40	Male	White	Married	≤20	Unknown	Positive	Ishak 5-6	T3	No	No/Unknown	No/Unknown
≤3	≥40	Male	White	Married	＞100	Unknown	Positive	Unknown	T3	No	No/Unknown	No/Unknown
＞3	≥40	Male	Black	Unmarried	Unknown	Unknown	Positive	Unknown	T3	No	No/Unknown	Yes
＞3	≥40	Male	White	Married	21~50	Unknown	Negative	Unknown	T2	No	No/Unknown	No/Unknown
＞3	≥40	Male	White	Divorced	51~100	Unknown	Positive	Unknown	T3	No	No/Unknown	Yes
＞3	≥40	Male	White	Married	51~100	Unknown	Positive	Unknown	T3	No	No/Unknown	No/Unknown
＞3	≥40	Male	White	Unmarried	＞100	Unknown	Positive	Unknown	T3	No	Yes	Yes
＞3	≥40	Male	White	Married	51~100	Unknown	Positive	Unknown	T3	No	Yes	No/Unknown
＞3	≥40	Male	White	Widowed	＞100	Grade III	Negative	Unknown	T3	No	No/Unknown	Yes
≤3	≥40	Male	White	Unmarried	51~100	Unknown	Positive	Unknown	T3	No	No/Unknown	No/Unknown
≤3	≥40	Male	White	Widowed	51~100	Unknown	Positive	Unknown	T3	No	No/Unknown	No/Unknown
≤3	≥40	Male	White	Married	＞100	Unknown	Positive	Unknown	T3	No	No/Unknown	No/Unknown
＞3	≥40	Female	White	Married	21~50	Unknown	Positive	Unknown	T3	No	No/Unknown	Yes
＞3	≥40	Female	White	Married	51~100	Grade I	Negative	Unknown	T1	No	Yes	No/Unknown
≤3	≥40	Male	White	Married	51~100	Unknown	Unknown	Unknown	T2	No	No/Unknown	No/Unknown
＞3	≥40	Female	Black	Unmarried	21~50	Unknown	Unknown	Unknown	T2	No	No/Unknown	No/Unknown
＞3	≥40	Male	White	Married	51~100	Unknown	Positive	Unknown	T1	No	Yes	No/Unknown
＞3	≥40	Male	White	Married	51~100	Unknown	Unknown	Unknown	T3	No	No/Unknown	Yes
≤3	≥40	Male	Others	Married	＞100	Unknown	Positive	Unknown	T3	No	No/Unknown	Yes
≤3	≥40	Male	White	Married	51~100	Unknown	Unknown	Ishak 5-6	T3	No	No/Unknown	No/Unknown
≤3	≥40	Male	White	Married	＞100	Unknown	Positive	Unknown	T3	No	No/Unknown	No/Unknown
≤3	≥40	Female	White	Widowed	Unknown	Grade III	Positive	Unknown	TX	No	No/Unknown	No/Unknown
＞3	≥40	Male	Black	Married	21~50	Grade II	Positive	Unknown	T3	No	No/Unknown	Yes
≤3	≥40	Female	White	Widowed	＞100	Unknown	Positive	Unknown	T1	No	No/Unknown	No/Unknown
＞3	＜40	Female	Black	Unmarried	51~100	Grade I	Positive	Unknown	T1	No	No/Unknown	No/Unknown
＞3	≥40	Male	Others	Unmarried	Unknown	Unknown	Positive	Unknown	TX	No	No/Unknown	Yes
≤3	≥40	Male	White	Married	51~100	Grade III	Unknown	Unknown	T3	No	No/Unknown	Yes
≤3	≥40	Male	White	Unknown	Unknown	Grade II	Positive	Unknown	T3	No	No/Unknown	Yes
＞3	≥40	Male	White	Unmarried	21~50	Grade I	Positive	Unknown	T2	No	No/Unknown	Yes
≤3	≥40	Male	Black	Unmarried	51~100	Grade III	Positive	Unknown	T1	No	No/Unknown	No/Unknown
＞3	≥40	Male	White	Unmarried	21~50	Grade III	Positive	Unknown	T1	No	No/Unknown	No/Unknown
≤3	≥40	Male	White	Married	51~100	Grade I	Positive	Unknown	T3	No	No/Unknown	No/Unknown
≤3	≥40	Male	White	Unmarried	＞100	Unknown	Positive	Unknown	T3	No	No/Unknown	Yes
≤3	≥40	Male	White	Divorced	Unknown	Unknown	Positive	Unknown	TX	No	No/Unknown	Yes
≤3	≥40	Male	White	Married	Unknown	Unknown	Positive	Unknown	T4	No	No/Unknown	No/Unknown
＞3	≥40	Male	White	Divorced	51~100	Unknown	Positive	Unknown	T3	No	No/Unknown	Yes
≤3	≥40	Male	White	Unmarried	51~100	Unknown	Positive	Unknown	T3	No	No/Unknown	No/Unknown
＞3	≥40	Male	Black	Unmarried	21~50	Grade III	Positive	Unknown	T2	No	No/Unknown	Yes
＞3	≥40	Female	White	Widowed	51~100	Unknown	Unknown	Unknown	T4	No	No/Unknown	No/Unknown
≤3	≥40	Male	White	Unmarried	51~100	Grade II	Positive	Unknown	T1	No	No/Unknown	No/Unknown
≤3	≥40	Male	White	Married	51~100	Grade II	Positive	Ishak 5-6	T3	No	No/Unknown	Yes
≤3	≥40	Male	Black	Unmarried	Unknown	Unknown	Positive	Unknown	TX	No	No/Unknown	No/Unknown
＞3	≥40	Female	Black	Unmarried	51~100	Grade III	Unknown	Unknown	T1	No	Yes	No/Unknown
≤3	≥40	Male	White	Married	51~100	Unknown	Unknown	Unknown	T1	No	No/Unknown	No/Unknown
＞3	≥40	Male	Black	Unmarried	Unknown	Unknown	Positive	Unknown	TX	No	No/Unknown	Yes
≤3	≥40	Male	White	Married	51~100	Grade III	Positive	Unknown	T1	No	No/Unknown	No/Unknown
＞3	≥40	Male	White	Married	51~100	Grade I	Positive	Ishak 5-6	T3	No	No/Unknown	Yes
≤3	≥40	Male	Black	Married	Unknown	Grade III	Positive	Ishak 5-6	T3	No	No/Unknown	Yes
＞3	≥40	Female	Black	Unmarried	51~100	Unknown	Positive	Unknown	T3	No	No/Unknown	No/Unknown
＞3	≥40	Male	Black	Unmarried	Unknown	Unknown	Positive	Unknown	T3	No	No/Unknown	No/Unknown
≤3	≥40	Female	Black	Unmarried	21~50	Unknown	Positive	Unknown	T3	No	No/Unknown	No/Unknown
≤3	≥40	Male	White	Divorced	Unknown	Unknown	Positive	Unknown	TX	No	No/Unknown	No/Unknown
＞3	≥40	Male	Black	Unmarried	51~100	Unknown	Positive	Unknown	T3	No	No/Unknown	Yes
＞3	≥40	Male	Black	Unknown	Unknown	Unknown	Unknown	Unknown	T3	No	No/Unknown	Yes
＞3	≥40	Male	Black	Unmarried	≤20	Grade II	Positive	Unknown	T2	No	No/Unknown	Yes
≤3	≥40	Male	White	Married	Unknown	Unknown	Positive	Unknown	T1	No	No/Unknown	No/Unknown
＞3	≥40	Female	White	Married	Unknown	Unknown	Positive	Unknown	TX	No	No/Unknown	No/Unknown
≤3	≥40	Male	White	Married	＞100	Grade II	Positive	Unknown	T1	No	No/Unknown	No/Unknown
＞3	≥40	Male	White	Married	21~50	Unknown	Positive	Unknown	T2	No	No/Unknown	Yes
≤3	≥40	Male	Black	Married	＞100	Grade III	Positive	Unknown	T3	No	No/Unknown	Yes
＞3	≥40	Male	Black	Unmarried	51~100	Unknown	Positive	Unknown	T3	No	No/Unknown	Yes
＞3	≥40	Male	Others	Married	＞100	Grade I	Positive	Unknown	T3	No	No/Unknown	No/Unknown
＞3	≥40	Male	White	Unknown	51~100	Unknown	Positive	Ishak 0-4	T3	No	No/Unknown	No/Unknown
≤3	≥40	Male	White	Married	21~50	Unknown	Positive	Unknown	T1	No	No/Unknown	No/Unknown
＞3	≥40	Male	Black	Married	≤20	Unknown	Positive	Unknown	T3	No	No/Unknown	Yes
＞3	≥40	Male	White	Married	Unknown	Unknown	Negative	Unknown	T1	No	No/Unknown	Yes
＞3	≥40	Male	White	Married	＞100	Grade II	Negative	Unknown	T3	Wedge resection	No/Unknown	Yes
≤3	≥40	Male	White	Married	21~50	Unknown	Positive	Unknown	T2	No	No/Unknown	Yes
＞3	≥40	Male	Black	Divorced	＞100	Unknown	Positive	Unknown	T3	No	No/Unknown	Yes
＞3	≥40	Male	Black	Married	51~100	Unknown	Positive	Unknown	T3	No	No/Unknown	Yes
＞3	≥40	Male	Black	Married	＞100	Unknown	Positive	Unknown	T4	No	Yes	Yes
＞3	≥40	Female	White	Divorced	51~100	Unknown	Unknown	Unknown	T3	No	No/Unknown	No/Unknown
≤3	＜40	Male	Black	Unmarried	Unknown	Unknown	Unknown	Unknown	T4	No	No/Unknown	No/Unknown
＞3	＜40	Male	White	Unmarried	51~100	Unknown	Negative	Unknown	T3	Wedge resection	No/Unknown	Yes
≤3	≥40	Male	White	Married	51~100	Unknown	Positive	Unknown	T1	No	No/Unknown	Yes
＞3	≥40	Male	White	Married	21~50	Unknown	Positive	Unknown	T2	No	No/Unknown	Yes
＞3	≥40	Male	White	Divorced	51~100	Unknown	Positive	Unknown	T1	No	No/Unknown	Yes
≤3	≥40	Male	Black	Married	Unknown	Unknown	Positive	Unknown	T3	No	No/Unknown	No/Unknown
＞3	≥40	Male	Others	Unknown	21~50	Grade III	Positive	Unknown	T2	Local tumor destruction	No/Unknown	Yes
≤3	≥40	Male	Black	Married	21~50	Unknown	Positive	Unknown	T2	No	No/Unknown	No/Unknown
＞3	≥40	Male	White	Married	Unknown	Grade II	Positive	Unknown	T3	No	Yes	Yes
＞3	≥40	Male	Black	Married	Unknown	Unknown	Positive	Unknown	TX	No	No/Unknown	Yes
＞3	≥40	Male	White	Unmarried	21~50	Grade I	Positive	Ishak 0-4	T2	Local tumor destruction	No/Unknown	No/Unknown
≤3	≥40	Female	Black	Married	21~50	Grade I	Unknown	Unknown	T1	No	No/Unknown	No/Unknown
≤3	≥40	Male	Black	Married	Unknown	Unknown	Positive	Unknown	TX	No	No/Unknown	No/Unknown
＞3	≥40	Male	Black	Unmarried	21~50	Unknown	Positive	Unknown	T3	No	No/Unknown	Yes
≤3	≥40	Female	White	Widowed	51~100	Unknown	Positive	Unknown	T1	No	No/Unknown	No/Unknown
＞3	≥40	Male	Black	Unmarried	51~100	Unknown	Negative	Unknown	T1	No	No/Unknown	Yes
＞3	≥40	Female	White	Unknown	21~50	Unknown	Negative	Unknown	T2	No	Yes	Yes
＞3	≥40	Female	Black	Unmarried	51~100	Unknown	Positive	Unknown	T3	No	No/Unknown	Yes
≤3	≥40	Male	Black	Divorced	51~100	Grade II	Negative	Unknown	T3	No	No/Unknown	No/Unknown
＞3	≥40	Male	Black	Married	21~50	Grade II	Positive	Unknown	T2	No	No/Unknown	Yes
≤3	≥40	Female	White	Divorced	51~100	Unknown	Positive	Unknown	T3	No	No/Unknown	Yes
≤3	≥40	Male	White	Married	Unknown	Unknown	Unknown	Unknown	T1	No	No/Unknown	No/Unknown
＞3	≥40	Male	Black	Unmarried	51~100	Unknown	Positive	Unknown	T3	No	Yes	Yes
≤3	≥40	Male	White	Unmarried	21~50	Grade III	Positive	Unknown	T3	No	Yes	Yes
＞3	≥40	Male	White	Unmarried	Unknown	Unknown	Positive	Unknown	TX	No	No/Unknown	Yes
＞3	≥40	Male	White	Married	51~100	Unknown	Positive	Unknown	T3	No	Yes	No/Unknown
＞3	≥40	Male	White	Married	＞100	Grade II	Positive	Unknown	T3	No	Yes	Yes
≤3	≥40	Male	White	Divorced	21~50	Unknown	Positive	Unknown	T3	No	No/Unknown	No/Unknown
≤3	≥40	Male	White	Divorced	51~100	Grade III	Positive	Unknown	T3	No	No/Unknown	No/Unknown
＞3	≥40	Male	Black	Married	51~100	Unknown	Positive	Unknown	T3	No	Yes	No/Unknown
＞3	≥40	Female	Others	Married	21~50	Unknown	Positive	Unknown	T2	No	No/Unknown	Yes
≤3	≥40	Male	White	Widowed	51~100	Unknown	Unknown	Unknown	T3	No	No/Unknown	No/Unknown
≤3	≥40	Male	Black	Married	51~100	Unknown	Positive	Unknown	T3	No	No/Unknown	Yes
≤3	≥40	Female	Black	Married	51~100	Unknown	Positive	Ishak 5-6	T2	No	No/Unknown	No/Unknown
＞3	≥40	Male	White	Married	51~100	Grade III	Negative	Unknown	T3	No	No/Unknown	Yes
≤3	≥40	Male	Black	Unmarried	Unknown	Grade III	Negative	Unknown	TX	No	No/Unknown	No/Unknown
＞3	≥40	Male	White	Unmarried	≤20	Grade III	Positive	Ishak 5-6	T4	No	No/Unknown	No/Unknown
＞3	≥40	Male	Others	Unmarried	Unknown	Grade II	Positive	Unknown	TX	No	Yes	No/Unknown
＞3	≥40	Male	White	Married	21~50	Grade II	Positive	Ishak 0-4	T2	No	No/Unknown	Yes
≤3	≥40	Male	White	Divorced	＞100	Grade IV	Negative	Unknown	T1	No	No/Unknown	No/Unknown
≤3	≥40	Male	Black	Unmarried	Unknown	Unknown	Positive	Unknown	T4	No	No/Unknown	No/Unknown
＞3	≥40	Female	White	Unmarried	21~50	Grade III	Negative	Unknown	T2	No	Yes	Yes
≤3	≥40	Male	Black	Widowed	Unknown	Unknown	Unknown	Unknown	T3	No	No/Unknown	Yes
＞3	≥40	Male	White	Married	51~100	Unknown	Unknown	Unknown	T3	No	No/Unknown	No/Unknown
≤3	≥40	Female	White	Married	51~100	Unknown	Unknown	Unknown	TX	Local tumor destruction	No/Unknown	Yes
＞3	≥40	Male	Black	Married	51~100	Unknown	Positive	Unknown	T3	No	No/Unknown	No/Unknown
＞3	≥40	Male	White	Unknown	51~100	Grade III	Negative	Unknown	T2	No	Yes	No/Unknown
＞3	≥40	Female	White	Married	51~100	Grade III	Positive	Unknown	T2	Wedge resection	No/Unknown	No/Unknown
＞3	≥40	Male	White	Unmarried	21~50	Unknown	Unknown	Unknown	T1	No	No/Unknown	No/Unknown
≤3	≥40	Male	Black	Divorced	＞100	Unknown	Positive	Unknown	T3	No	No/Unknown	No/Unknown
＞3	≥40	Male	Black	Unknown	51~100	Unknown	Unknown	Unknown	T3	No	Yes	No/Unknown
≤3	≥40	Male	White	Unmarried	≤20	Unknown	Positive	Unknown	TX	No	No/Unknown	Yes
＞3	≥40	Male	White	Divorced	51~100	Unknown	Unknown	Unknown	T3	No	No/Unknown	No/Unknown
＞3	≥40	Male	White	Widowed	＞100	Unknown	Positive	Unknown	T3	No	Yes	No/Unknown
≤3	≥40	Male	White	Married	51~100	Unknown	Negative	Unknown	T1	No	No/Unknown	Yes
＞3	≥40	Male	White	Married	51~100	Grade I	Unknown	Unknown	TX	No	No/Unknown	No/Unknown
≤3	≥40	Male	White	Married	＞100	Grade III	Positive	Unknown	T3	No	No/Unknown	No/Unknown
＞3	≥40	Female	White	Married	Unknown	Grade I	Positive	Unknown	T2	No	No/Unknown	Yes
＞3	≥40	Female	White	Divorced	51~100	Unknown	Positive	Unknown	T3	No	No/Unknown	No/Unknown
≤3	≥40	Female	White	Separated	51~100	Unknown	Unknown	Unknown	T3	No	No/Unknown	No/Unknown
＞3	≥40	Male	White	Married	51~100	Grade III	Positive	Unknown	T3	Wedge resection	No/Unknown	No/Unknown
＞3	≥40	Male	White	Married	21~50	Unknown	Unknown	Unknown	T1	No	No/Unknown	Yes
＞3	≥40	Male	White	Unknown	21~50	Unknown	Positive	Unknown	T1	Local tumor destruction	No/Unknown	Yes
＞3	≥40	Male	White	Unknown	51~100	Unknown	Unknown	Unknown	T3	Local tumor destruction	Yes	Yes
≤3	≥40	Male	White	Unmarried	51~100	Grade II	Positive	Unknown	T3	No	No/Unknown	No/Unknown
＞3	≥40	Male	Black	Married	＞100	Unknown	Unknown	Unknown	T3	No	No/Unknown	Yes
≤3	≥40	Male	White	Unmarried	51~100	Grade II	Unknown	Unknown	T3	No	No/Unknown	No/Unknown
＞3	≥40	Female	Others	Married	≤20	Unknown	Positive	Unknown	T2	No	No/Unknown	No/Unknown
＞3	≥40	Male	White	Divorced	51~100	Unknown	Positive	Unknown	T3	No	No/Unknown	Yes
＞3	≥40	Female	White	Married	Unknown	Unknown	Positive	Unknown	T3	No	Yes	No/Unknown
＞3	≥40	Male	White	Unmarried	Unknown	Grade III	Positive	Unknown	T1	No	No/Unknown	No/Unknown
≤3	≥40	Male	White	Married	21~50	Unknown	Positive	Unknown	T2	No	No/Unknown	No/Unknown
≤3	≥40	Male	Others	Unknown	＞100	Unknown	Positive	Unknown	T3	No	No/Unknown	No/Unknown
≤3	≥40	Male	Others	Married	21~50	Unknown	Unknown	Unknown	T2	No	No/Unknown	No/Unknown
≤3	≥40	Male	White	Married	21~50	Grade I	Positive	Unknown	T3	No	No/Unknown	No/Unknown
≤3	≥40	Female	White	Divorced	21~50	Unknown	Positive	Unknown	T4	No	No/Unknown	No/Unknown
≤3	≥40	Male	Black	Unknown	Unknown	Unknown	Unknown	Unknown	T1	No	No/Unknown	No/Unknown
≤3	≥40	Male	White	Unmarried	Unknown	Unknown	Positive	Unknown	T1	No	No/Unknown	No/Unknown
≤3	≥40	Male	White	Unmarried	51~100	Unknown	Positive	Unknown	TX	No	No/Unknown	No/Unknown
＞3	≥40	Male	White	Unknown	21~50	Unknown	Unknown	Unknown	T2	No	No/Unknown	No/Unknown
≤3	≥40	Male	White	Married	Unknown	Grade III	Positive	Unknown	T3	No	No/Unknown	No/Unknown
＞3	≥40	Male	Others	Married	51~100	Unknown	Positive	Unknown	T1	No	Yes	No/Unknown
＞3	≥40	Male	Black	Divorced	＞100	Unknown	Positive	Unknown	T1	No	No/Unknown	No/Unknown
＞3	≥40	Female	White	Married	21~50	Unknown	Unknown	Unknown	TX	No	No/Unknown	No/Unknown
＞3	≥40	Male	White	Separated	51~100	Grade I	Positive	Unknown	T3	No	No/Unknown	Yes
＞3	≥40	Male	White	Married	51~100	Grade I	Positive	Unknown	T3	No	No/Unknown	Yes
＞3	≥40	Male	White	Divorced	≤20	Unknown	Positive	Unknown	T1	No	No/Unknown	Yes
＞3	≥40	Male	White	Married	Unknown	Unknown	Unknown	Unknown	TX	No	No/Unknown	Yes
＞3	≥40	Male	White	Widowed	21~50	Unknown	Positive	Unknown	TX	No	No/Unknown	No/Unknown
＞3	≥40	Male	White	Married	51~100	Unknown	Positive	Unknown	T3	Wedge resection	No/Unknown	Yes
≤3	≥40	Male	White	Unmarried	51~100	Unknown	Unknown	Ishak 5-6	T1	No	No/Unknown	No/Unknown
≤3	≥40	Female	White	Widowed	51~100	Grade III	Unknown	Unknown	TX	No	No/Unknown	No/Unknown
＞3	≥40	Male	White	Unmarried	51~100	Grade I	Positive	Unknown	T3	No	No/Unknown	Yes
≤3	＜40	Male	White	Unmarried	＞100	Unknown	Positive	Unknown	T3	No	No/Unknown	No/Unknown
≤3	≥40	Male	Others	Married	Unknown	Grade III	Unknown	Unknown	T4	Wedge resection	No/Unknown	No/Unknown
＞3	≥40	Male	White	Unmarried	＞100	Grade II	Positive	Unknown	T3	No	Yes	No/Unknown
≤3	≥40	Male	Others	Married	＞100	Unknown	Positive	Unknown	T3	No	No/Unknown	No/Unknown
≤3	≥40	Male	Black	Unmarried	21~50	Grade II	Positive	Unknown	T3	No	No/Unknown	No/Unknown
＞3	≥40	Male	White	Married	＞100	Unknown	Positive	Unknown	T3	No	No/Unknown	Yes
≤3	≥40	Male	White	Unmarried	21~50	Grade II	Positive	Unknown	T3	No	No/Unknown	Yes
≤3	≥40	Male	White	Divorced	Unknown	Grade II	Positive	Unknown	T3	No	No/Unknown	No/Unknown
＞3	≥40	Male	White	Married	＞100	Grade I	Negative	Unknown	T1	No	No/Unknown	Yes
＞3	≥40	Male	White	Unmarried	51~100	Unknown	Positive	Unknown	T2	No	Yes	Yes
≤3	≥40	Male	White	Divorced	＞100	Unknown	Unknown	Unknown	T4	No	No/Unknown	No/Unknown
＞3	≥40	Male	Black	Unmarried	≤20	Unknown	Positive	Unknown	T1	Local tumor destruction	No/Unknown	No/Unknown
＞3	≥40	Male	White	Married	Unknown	Unknown	Positive	Unknown	T3	No	No/Unknown	Yes
≤3	≥40	Male	White	Married	51~100	Grade III	Positive	Unknown	T1	No	No/Unknown	Yes
＞3	≥40	Male	Black	Married	21~50	Unknown	Positive	Unknown	T2	No	No/Unknown	Yes
≤3	≥40	Male	Others	Married	＞100	Grade II	Positive	Unknown	T3	No	No/Unknown	No/Unknown
＞3	≥40	Male	Black	Married	51~100	Grade I	Positive	Unknown	T1	No	No/Unknown	Yes
＞3	≥40	Male	White	Married	51~100	Grade I	Positive	Unknown	T2	Lobectomy	No/Unknown	Yes
≤3	≥40	Male	White	Divorced	Unknown	Unknown	Positive	Unknown	T3	No	No/Unknown	No/Unknown
＞3	≥40	Female	Black	Widowed	＞100	Unknown	Positive	Unknown	T2	No	No/Unknown	Yes
＞3	＜40	Male	White	Unmarried	Unknown	Unknown	Unknown	Unknown	T3	No	No/Unknown	No/Unknown
≤3	≥40	Male	White	Married	51~100	Grade II	Positive	Unknown	T1	No	No/Unknown	No/Unknown
≤3	≥40	Female	White	Unmarried	51~100	Unknown	Positive	Unknown	T3	No	No/Unknown	No/Unknown
≤3	≥40	Male	White	Married	21~50	Unknown	Positive	Unknown	T1	No	No/Unknown	No/Unknown
≤3	＜40	Male	White	Unmarried	Unknown	Unknown	Unknown	Unknown	TX	No	No/Unknown	No/Unknown
＞3	≥40	Male	White	Married	＞100	Unknown	Positive	Unknown	T3	No	Yes	Yes
＞3	≥40	Male	White	Divorced	21~50	Unknown	Positive	Unknown	TX	No	No/Unknown	No/Unknown
＞3	≥40	Male	White	Married	51~100	Unknown	Negative	Unknown	T3	No	Yes	No/Unknown
＞3	≥40	Male	White	Married	Unknown	Unknown	Unknown	Unknown	TX	No	No/Unknown	No/Unknown
≤3	≥40	Male	White	Married	Unknown	Unknown	Positive	Unknown	T4	No	No/Unknown	No/Unknown
≤3	≥40	Male	White	Unknown	51~100	Unknown	Positive	Unknown	T3	No	No/Unknown	Yes
＞3	≥40	Male	White	Unknown	＞100	Unknown	Unknown	Unknown	T3	No	Yes	Yes
＞3	≥40	Male	White	Married	51~100	Unknown	Positive	Unknown	T2	No	No/Unknown	Yes
≤3	≥40	Male	White	Divorced	＞100	Grade III	Unknown	Unknown	T3	No	Yes	No/Unknown
＞3	≥40	Male	White	Unknown	21~50	Grade I	Unknown	Unknown	T3	No	No/Unknown	Yes
≤3	≥40	Male	White	Unmarried	51~100	Grade I	Unknown	Unknown	T3	No	No/Unknown	No/Unknown
＞3	≥40	Male	Black	Married	21~50	Unknown	Positive	Unknown	T2	No	No/Unknown	Yes
≤3	≥40	Male	White	Married	21~50	Grade III	Positive	Unknown	T4	No	No/Unknown	No/Unknown
＞3	≥40	Male	White	Unknown	21~50	Unknown	Positive	Unknown	T3	No	Yes	Yes
≤3	≥40	Male	Black	Unmarried	＞100	Grade II	Positive	Unknown	T3	No	No/Unknown	No/Unknown
≤3	≥40	Male	White	Separated	＞100	Unknown	Positive	Unknown	T3	No	Yes	No/Unknown
＞3	≥40	Male	White	Married	21~50	Unknown	Unknown	Unknown	T1	No	No/Unknown	No/Unknown
≤3	≥40	Male	White	Married	51~100	Unknown	Positive	Unknown	T3	No	Yes	No/Unknown
＞3	≥40	Male	White	Married	＞100	Grade II	Positive	Ishak 5-6	T3	No	Yes	Yes
＞3	≥40	Male	White	Married	21~50	Unknown	Positive	Unknown	T2	No	No/Unknown	No/Unknown
≤3	≥40	Male	White	Unmarried	21~50	Unknown	Positive	Unknown	T3	No	No/Unknown	No/Unknown
≤3	≥40	Male	White	Divorced	Unknown	Unknown	Unknown	Unknown	TX	No	No/Unknown	No/Unknown
＞3	≥40	Female	White	Widowed	21~50	Grade I	Positive	Ishak 5-6	T2	No	No/Unknown	No/Unknown
＞3	≥40	Male	Black	Unmarried	51~100	Unknown	Positive	Unknown	T3	No	No/Unknown	Yes
＞3	≥40	Male	White	Married	51~100	Unknown	Positive	Ishak 5-6	T1	No	No/Unknown	Yes
＞3	≥40	Male	White	Married	51~100	Grade III	Positive	Unknown	T2	No	No/Unknown	Yes
≤3	≥40	Male	White	Married	21~50	Unknown	Negative	Unknown	T1	No	No/Unknown	No/Unknown
≤3	≥40	Male	White	Married	51~100	Grade III	Positive	Unknown	T2	No	No/Unknown	Yes
≤3	≥40	Male	White	Unmarried	21~50	Unknown	Positive	Unknown	TX	No	No/Unknown	No/Unknown
≤3	≥40	Male	White	Unknown	Unknown	Unknown	Unknown	Unknown	T1	No	No/Unknown	No/Unknown
≤3	≥40	Male	White	Unknown	51~100	Unknown	Positive	Unknown	T3	No	No/Unknown	No/Unknown
＞3	≥40	Male	Black	Unmarried	21~50	Unknown	Positive	Unknown	T3	No	No/Unknown	Yes
＞3	＜40	Female	Black	Unmarried	＞100	Unknown	Positive	Unknown	T4	No	Yes	Yes
＞3	≥40	Female	White	Married	21~50	Unknown	Positive	Unknown	T2	No	No/Unknown	Yes
≤3	≥40	Female	Black	Unmarried	＞100	Unknown	Positive	Unknown	T3	No	No/Unknown	No/Unknown
＞3	≥40	Male	White	Married	21~50	Unknown	Positive	Unknown	T4	No	No/Unknown	Yes
≤3	≥40	Male	White	Widowed	51~100	Unknown	Positive	Unknown	T4	No	No/Unknown	No/Unknown
≤3	≥40	Male	White	Divorced	＞100	Unknown	Positive	Unknown	T3	No	No/Unknown	No/Unknown
≤3	≥40	Male	White	Unknown	51~100	Unknown	Positive	Unknown	T3	No	No/Unknown	Yes
＞3	≥40	Female	White	Unmarried	51~100	Unknown	Positive	Unknown	T3	No	No/Unknown	Yes
＞3	≥40	Male	White	Married	21~50	Grade III	Unknown	Unknown	T1	Local tumor destruction	No/Unknown	Yes
＞3	≥40	Male	White	Married	51~100	Unknown	Unknown	Unknown	T3	No	No/Unknown	No/Unknown
≤3	≥40	Male	White	Married	51~100	Grade I	Positive	Unknown	T3	No	No/Unknown	Yes
＞3	≥40	Male	Others	Married	＞100	Unknown	Positive	Unknown	T1	No	No/Unknown	Yes
≤3	≥40	Male	White	Married	51~100	Grade I	Negative	Unknown	T3	No	No/Unknown	No/Unknown
＞3	≥40	Male	White	Widowed	51~100	Grade II	Positive	Unknown	T3	No	No/Unknown	No/Unknown
＞3	≥40	Male	White	Unmarried	51~100	Unknown	Positive	Unknown	T3	No	Yes	No/Unknown
≤3	≥40	Male	Black	Unmarried	＞100	Grade II	Positive	Unknown	T3	No	No/Unknown	No/Unknown
≤3	≥40	Male	White	Unmarried	Unknown	Grade III	Positive	Unknown	T1	No	No/Unknown	No/Unknown
＞3	≥40	Male	Black	Married	21~50	Unknown	Unknown	Unknown	T2	No	No/Unknown	Yes
＞3	≥40	Male	White	Divorced	21~50	Grade III	Positive	Unknown	T1	No	No/Unknown	No/Unknown
≤3	≥40	Male	White	Unmarried	21~50	Unknown	Positive	Unknown	T3	No	No/Unknown	No/Unknown
＞3	≥40	Male	White	Divorced	Unknown	Grade I	Positive	Unknown	TX	No	Yes	Yes
≤3	≥40	Male	White	Married	＞100	Unknown	Positive	Unknown	T4	No	No/Unknown	Yes
＞3	≥40	Female	White	Unknown	＞100	Unknown	Positive	Unknown	T3	No	No/Unknown	Yes
＞3	≥40	Female	White	Divorced	51~100	Unknown	Positive	Unknown	T1	No	Yes	Yes
＞3	≥40	Male	White	Divorced	21~50	Grade III	Positive	Unknown	T4	No	Yes	Yes
＞3	≥40	Female	White	Married	Unknown	Grade III	Negative	Unknown	T3	No	No/Unknown	Yes
≤3	≥40	Male	White	Married	Unknown	Grade III	Positive	Unknown	T3	No	No/Unknown	No/Unknown
＞3	≥40	Female	White	Unknown	51~100	Unknown	Unknown	Unknown	T3	No	No/Unknown	Yes
≤3	≥40	Male	White	Unknown	Unknown	Unknown	Unknown	Unknown	T3	No	No/Unknown	No/Unknown
≤3	≥40	Male	Black	Married	＞100	Grade I	Positive	Unknown	T3	No	No/Unknown	Yes
＞3	≥40	Female	White	Married	51~100	Unknown	Positive	Unknown	T1	No	No/Unknown	Yes
＞3	≥40	Male	Black	Married	＞100	Unknown	Negative	Unknown	T1	No	Yes	No/Unknown
＞3	≥40	Male	White	Married	51~100	Unknown	Negative	Unknown	T3	No	No/Unknown	Yes
≤3	≥40	Male	Black	Married	＞100	Unknown	Positive	Ishak 5-6	T1	No	No/Unknown	No/Unknown
＞3	≥40	Male	White	Unmarried	51~100	Unknown	Negative	Unknown	T1	No	No/Unknown	No/Unknown
≤3	≥40	Male	Black	Unmarried	＞100	Grade II	Positive	Unknown	TX	No	No/Unknown	No/Unknown
≤3	≥40	Male	White	Married	51~100	Grade III	Unknown	Unknown	T3	No	No/Unknown	No/Unknown
≤3	≥40	Female	Black	Married	51~100	Unknown	Positive	Unknown	T1	No	No/Unknown	Yes
＞3	≥40	Male	White	Married	21~50	Unknown	Positive	Ishak 5-6	T3	No	No/Unknown	Yes
≤3	≥40	Male	White	Married	Unknown	Unknown	Positive	Unknown	T3	No	No/Unknown	No/Unknown
＞3	≥40	Male	White	Married	21~50	Grade II	Positive	Ishak 5-6	T3	No	No/Unknown	Yes
≤3	≥40	Male	White	Married	＞100	Grade III	Positive	Ishak 0-4	T3	No	No/Unknown	Yes
＞3	≥40	Male	White	Married	21~50	Unknown	Positive	Ishak 5-6	T2	No	No/Unknown	Yes
＞3	≥40	Male	White	Married	Unknown	Grade III	Positive	Unknown	T2	No	No/Unknown	No/Unknown
≤3	≥40	Male	White	Divorced	51~100	Grade III	Positive	Unknown	T1	No	No/Unknown	No/Unknown
≤3	≥40	Female	White	Married	＞100	Unknown	Unknown	Unknown	TX	No	No/Unknown	No/Unknown
＞3	≥40	Male	White	Married	Unknown	Unknown	Positive	Unknown	T3	No	No/Unknown	No/Unknown
＞3	≥40	Male	White	Married	51~100	Unknown	Positive	Unknown	T3	No	No/Unknown	No/Unknown
＞3	≥40	Male	Black	Widowed	51~100	Grade II	Unknown	Unknown	T1	No	No/Unknown	No/Unknown
≤3	≥40	Male	White	Married	51~100	Grade III	Positive	Unknown	T4	No	No/Unknown	Yes
＞3	＜40	Female	Black	Unmarried	51~100	Unknown	Positive	Unknown	T1	Wedge resection	No/Unknown	Yes
≤3	≥40	Female	White	Married	Unknown	Grade III	Negative	Unknown	T3	No	No/Unknown	No/Unknown
＞3	≥40	Female	White	Married	＞100	Unknown	Positive	Unknown	T3	No	No/Unknown	Yes
≤3	≥40	Male	White	Unknown	51~100	Unknown	Positive	Ishak 5-6	T3	No	No/Unknown	No/Unknown
＞3	≥40	Male	White	Married	21~50	Grade III	Positive	Unknown	T2	No	No/Unknown	Yes
＞3	≥40	Male	Black	Unmarried	Unknown	Unknown	Positive	Ishak 5-6	TX	No	No/Unknown	No/Unknown
≤3	≥40	Male	White	Married	Unknown	Unknown	Negative	Ishak 5-6	TX	No	No/Unknown	No/Unknown
≤3	≥40	Male	White	Married	51~100	Grade II	Positive	Unknown	T3	No	No/Unknown	Yes
＞3	≥40	Male	White	Married	＞100	Grade I	Unknown	Unknown	T3	No	Yes	No/Unknown
＞3	≥40	Male	White	Unknown	51~100	Unknown	Negative	Unknown	T3	No	No/Unknown	Yes
＞3	≥40	Male	White	Married	＞100	Grade I	Unknown	Unknown	T3	No	No/Unknown	No/Unknown
≤3	≥40	Male	White	Married	Unknown	Unknown	Negative	Ishak 5-6	TX	No	No/Unknown	No/Unknown
≤3	≥40	Male	Black	Unmarried	Unknown	Grade II	Positive	Unknown	T4	No	No/Unknown	No/Unknown
＞3	≥40	Male	White	Unmarried	21~50	Grade III	Positive	Unknown	T3	No	No/Unknown	Yes
≤3	≥40	Male	White	Unmarried	Unknown	Unknown	Unknown	Unknown	TX	No	No/Unknown	No/Unknown
＞3	≥40	Male	Black	Unmarried	21~50	Grade III	Unknown	Unknown	T1	No	No/Unknown	No/Unknown
＞3	≥40	Female	Black	Unmarried	21~50	Unknown	Positive	Unknown	T3	No	No/Unknown	Yes
≤3	≥40	Male	Black	Married	＞100	Unknown	Positive	Unknown	T3	No	No/Unknown	Yes
≤3	≥40	Male	Others	Married	51~100	Unknown	Positive	Unknown	T1	No	No/Unknown	No/Unknown
＞3	≥40	Male	White	Unmarried	51~100	Unknown	Positive	Unknown	T4	No	No/Unknown	Yes
＞3	≥40	Female	Black	Unmarried	51~100	Unknown	Positive	Unknown	T4	No	No/Unknown	Yes
≤3	≥40	Female	White	Married	Unknown	Unknown	Positive	Unknown	T3	No	No/Unknown	No/Unknown
≤3	≥40	Male	Black	Unmarried	≤20	Grade II	Positive	Unknown	T2	No	No/Unknown	No/Unknown
≤3	≥40	Male	White	Unmarried	51~100	Unknown	Negative	Unknown	T3	No	No/Unknown	No/Unknown
≤3	≥40	Male	Black	Married	＞100	Unknown	Positive	Unknown	T4	No	Yes	No/Unknown
≤3	≥40	Male	White	Married	Unknown	Grade III	Positive	Unknown	TX	No	No/Unknown	Yes
≤3	≥40	Male	Black	Unmarried	＞100	Grade III	Positive	Ishak 5-6	T3	No	No/Unknown	No/Unknown
≤3	≥40	Male	White	Married	51~100	Unknown	Positive	Unknown	T2	No	No/Unknown	No/Unknown
＞3	≥40	Male	White	Married	51~100	Unknown	Positive	Ishak 5-6	T1	No	Yes	Yes
≤3	≥40	Male	White	Married	51~100	Grade II	Positive	Unknown	T3	No	Yes	Yes
＞3	≥40	Female	White	Married	＞100	Grade III	Positive	Ishak 0-4	T3	Lobectomy	No/Unknown	No/Unknown
＞3	≥40	Female	White	Married	51~100	Grade III	Positive	Unknown	T1	No	No/Unknown	Yes
＞3	≥40	Male	White	Divorced	21~50	Unknown	Unknown	Unknown	T1	No	No/Unknown	Yes
≤3	≥40	Male	White	Married	21~50	Grade III	Positive	Unknown	T3	No	No/Unknown	Yes
＞3	≥40	Male	White	Married	21~50	Unknown	Positive	Unknown	T3	No	No/Unknown	Yes
≤3	≥40	Male	White	Married	51~100	Grade I	Negative	Unknown	T3	No	No/Unknown	No/Unknown
＞3	≥40	Male	White	Married	21~50	Grade I	Positive	Unknown	T3	No	No/Unknown	Yes
＞3	≥40	Female	Black	Separated	21~50	Unknown	Positive	Unknown	T2	No	No/Unknown	Yes
≤3	≥40	Male	White	Married	21~50	Unknown	Positive	Unknown	T2	No	No/Unknown	No/Unknown
≤3	≥40	Male	White	Unmarried	＞100	Unknown	Positive	Unknown	T4	No	No/Unknown	No/Unknown
＞3	≥40	Male	Black	Married	＞100	Unknown	Negative	Unknown	T2	No	No/Unknown	Yes
≤3	≥40	Female	White	Unknown	21~50	Unknown	Positive	Unknown	T3	No	No/Unknown	Yes
≤3	≥40	Male	Black	Unknown	51~100	Grade III	Positive	Unknown	T3	No	No/Unknown	Yes
≤3	≥40	Male	White	Unmarried	51~100	Unknown	Positive	Unknown	T3	No	No/Unknown	No/Unknown
＞3	≥40	Female	White	Married	≤20	Grade III	Positive	Unknown	T3	Lobectomy	No/Unknown	No/Unknown
≤3	≥40	Male	White	Married	＞100	Unknown	Negative	Unknown	T3	No	Yes	No/Unknown
＞3	≥40	Male	White	Unmarried	21~50	Unknown	Positive	Unknown	T2	No	Yes	Yes
≤3	≥40	Male	White	Divorced	51~100	Unknown	Positive	Ishak 5-6	T4	No	No/Unknown	No/Unknown
＞3	≥40	Male	White	Unknown	≤20	Unknown	Positive	Unknown	T2	No	No/Unknown	No/Unknown
≤3	≥40	Male	White	Widowed	51~100	Unknown	Positive	Unknown	T3	No	Yes	No/Unknown
≤3	≥40	Male	Black	Unmarried	51~100	Unknown	Positive	Unknown	T4	No	No/Unknown	Yes
≤3	≥40	Male	White	Married	＞100	Unknown	Positive	Unknown	T3	No	No/Unknown	No/Unknown
≤3	≥40	Male	Black	Unmarried	Unknown	Unknown	Unknown	Ishak 5-6	TX	No	No/Unknown	No/Unknown
≤3	≥40	Female	White	Widowed	51~100	Grade II	Positive	Unknown	T1	No	No/Unknown	Yes
≤3	≥40	Male	Black	Married	Unknown	Grade III	Positive	Unknown	T3	No	No/Unknown	Yes
≤3	≥40	Female	White	Widowed	21~50	Unknown	Positive	Ishak 5-6	T2	No	No/Unknown	Yes
＞3	≥40	Male	White	Married	51~100	Unknown	Positive	Unknown	T1	No	No/Unknown	Yes
＞3	≥40	Male	Black	Divorced	51~100	Unknown	Positive	Unknown	T3	No	No/Unknown	No/Unknown
≤3	≥40	Male	Black	Divorced	51~100	Grade II	Positive	Ishak 5-6	T3	No	No/Unknown	Yes
≤3	≥40	Male	White	Married	51~100	Grade III	Positive	Unknown	T1	No	No/Unknown	No/Unknown
＞3	≥40	Male	White	Widowed	51~100	Unknown	Positive	Unknown	T3	No	No/Unknown	No/Unknown
＞3	≥40	Female	Black	Unmarried	51~100	Unknown	Positive	Unknown	T1	No	Yes	Yes
＞3	≥40	Male	White	Unknown	51~100	Grade I	Negative	Ishak 5-6	T1	No	No/Unknown	Yes
≤3	≥40	Male	White	Married	Unknown	Grade II	Positive	Unknown	TX	No	No/Unknown	No/Unknown
≤3	≥40	Female	White	Widowed	＞100	Unknown	Unknown	Unknown	T3	No	No/Unknown	No/Unknown
≤3	≥40	Male	White	Unmarried	Unknown	Unknown	Positive	Unknown	T3	No	Yes	No/Unknown
≤3	≥40	Male	Black	Divorced	51~100	Unknown	Positive	Unknown	T3	No	No/Unknown	No/Unknown
≤3	≥40	Male	White	Unmarried	Unknown	Unknown	Unknown	Ishak 5-6	T4	No	No/Unknown	No/Unknown
＞3	≥40	Female	White	Married	＞100	Grade I	Positive	Ishak 0-4	T3	No	No/Unknown	Yes
＞3	≥40	Male	White	Married	Unknown	Unknown	Unknown	Ishak 5-6	T3	No	Yes	Yes
＞3	≥40	Male	White	Married	51~100	Grade III	Unknown	Unknown	T3	No	No/Unknown	Yes
＞3	≥40	Female	White	Widowed	51~100	Unknown	Positive	Ishak 5-6	T3	No	Yes	Yes
＞3	≥40	Male	White	Divorced	51~100	Unknown	Positive	Ishak 5-6	T2	No	No/Unknown	Yes
≤3	≥40	Female	White	Married	＞100	Unknown	Unknown	Unknown	T4	No	No/Unknown	No/Unknown
≤3	≥40	Male	White	Married	51~100	Unknown	Positive	Ishak 5-6	T3	No	No/Unknown	Yes
＞3	≥40	Male	White	Unmarried	51~100	Unknown	Unknown	Unknown	T3	No	No/Unknown	Yes
＞3	≥40	Male	White	Unmarried	51~100	Unknown	Positive	Ishak 5-6	T3	No	No/Unknown	Yes
＞3	≥40	Male	White	Married	51~100	Grade III	Positive	Unknown	T3	No	No/Unknown	Yes
≤3	≥40	Female	White	Married	51~100	Unknown	Positive	Unknown	T3	No	No/Unknown	No/Unknown
＞3	≥40	Male	White	Divorced	21~50	Unknown	Unknown	Ishak 5-6	T2	No	No/Unknown	Yes
≤3	≥40	Male	White	Married	＞100	Unknown	Positive	Ishak 5-6	T3	No	No/Unknown	Yes
≤3	≥40	Male	White	Divorced	51~100	Unknown	Unknown	Ishak 5-6	T1	No	No/Unknown	No/Unknown
